# Supplementary material for: Pre-Cambrian roots of novel Antarctic cryptoendolithic bacterial lineages
Source: PubMed Central journal article supplement (PMC7980648; doi:10.1186/s40168-021-01021-0), 2021-03-19

Bayesian posterior consensus trees of each of the 19 bacterial order datasets. For all nodes we provide the mean estimate (in million of years) and the 95% High Posterior densities of estimates (as bars). Uniquely Antarctic clades or lineages are depicted in red. For each of the orders we show the origin of the Order (OO: the split of the order from the closest order) with a black circle; the origin of the oldest uniquely Antarctic clade or lineage with a green circle (AOO1: the split of the Antarctic clade from a non-Antarctic lineage of the same order); where present, the origin of the second oldest Antarctic clade (AOO2) with a orange circle, and the origin of other eventual only Antarctic clades or lineages (A00n) with grey circle.

# Acetobacterales

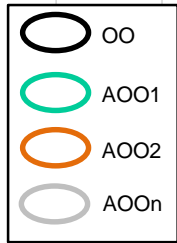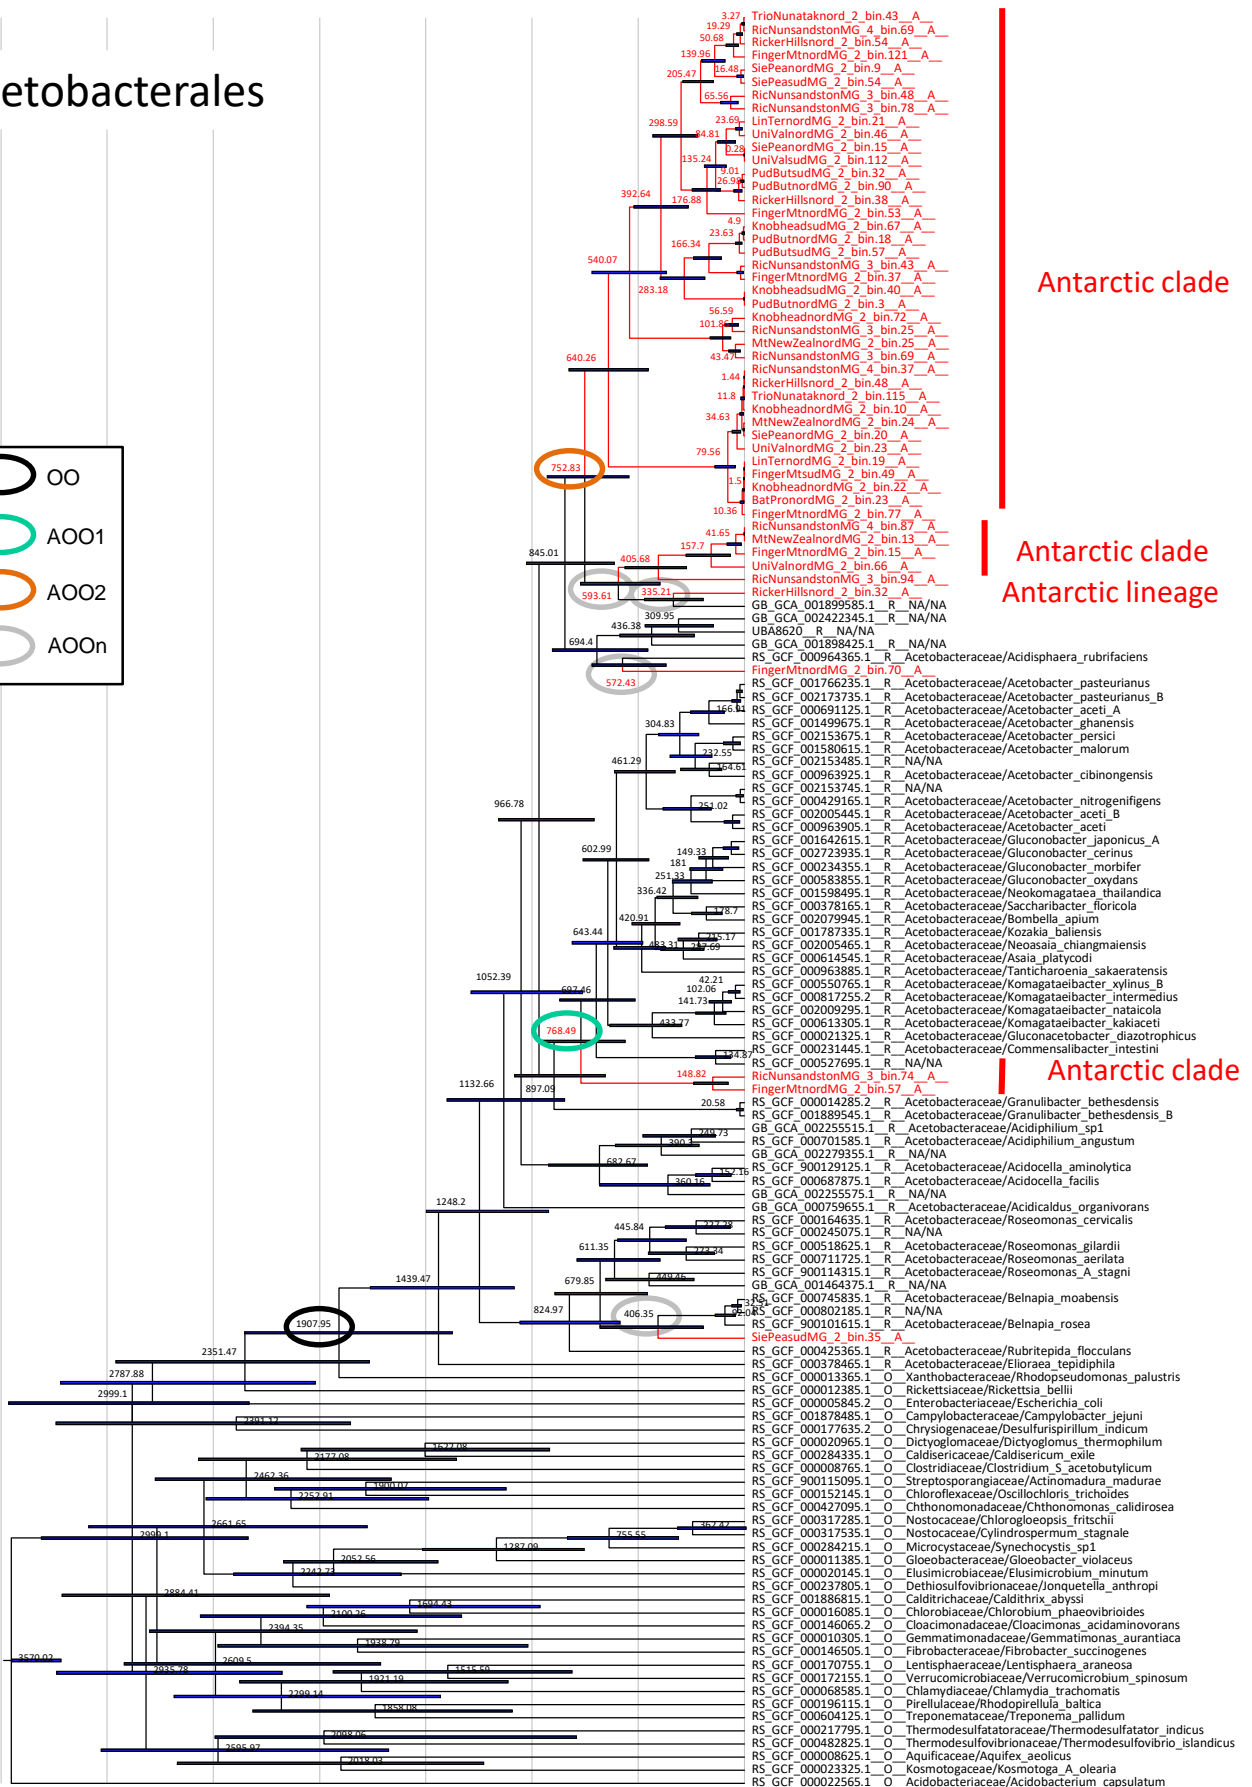

Antarctic clade

Antarctic clade  
Antarctic lineage

Antarctic clade

4000.0 3500.0 3000.0 2500.0 2000.0 1500.0 1000.0 500.0 0.0

# Acidobacteriales

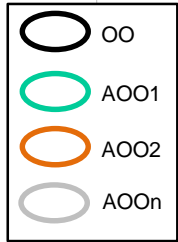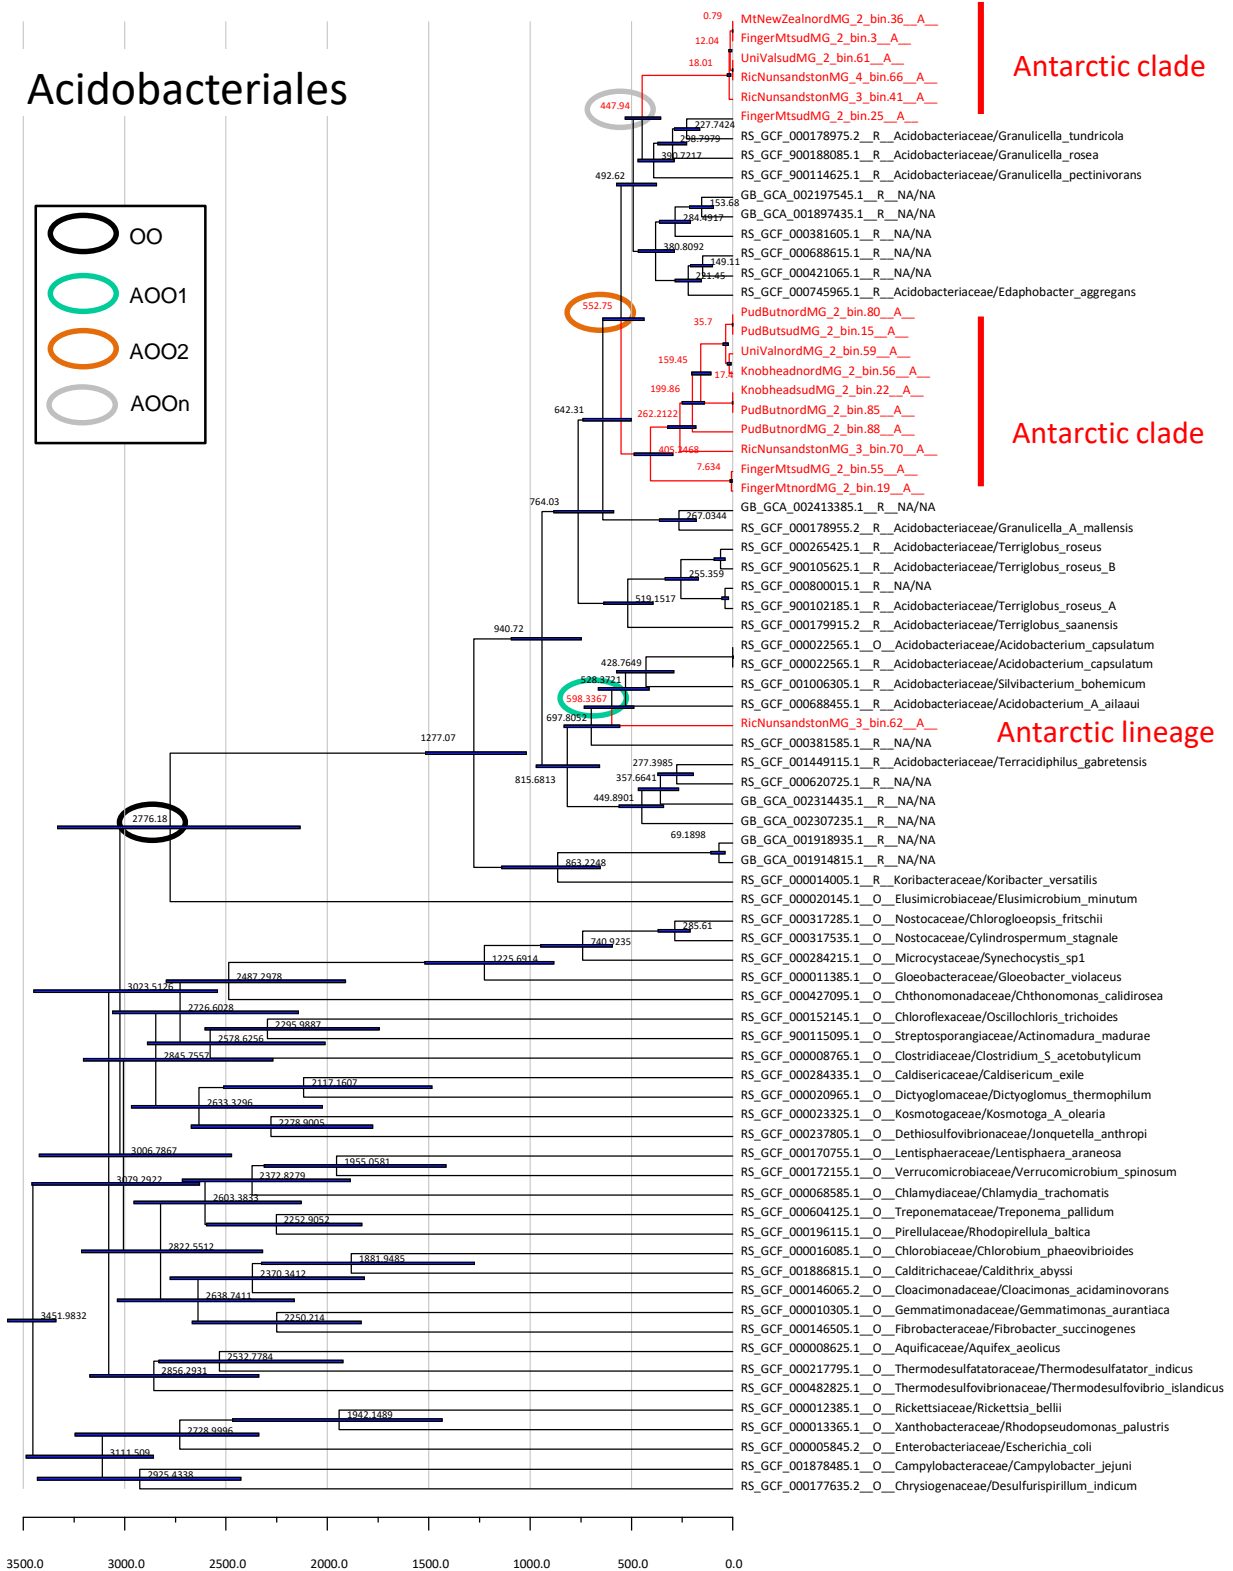

# Actinomycetales

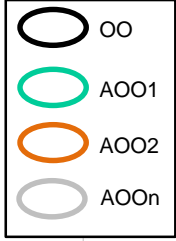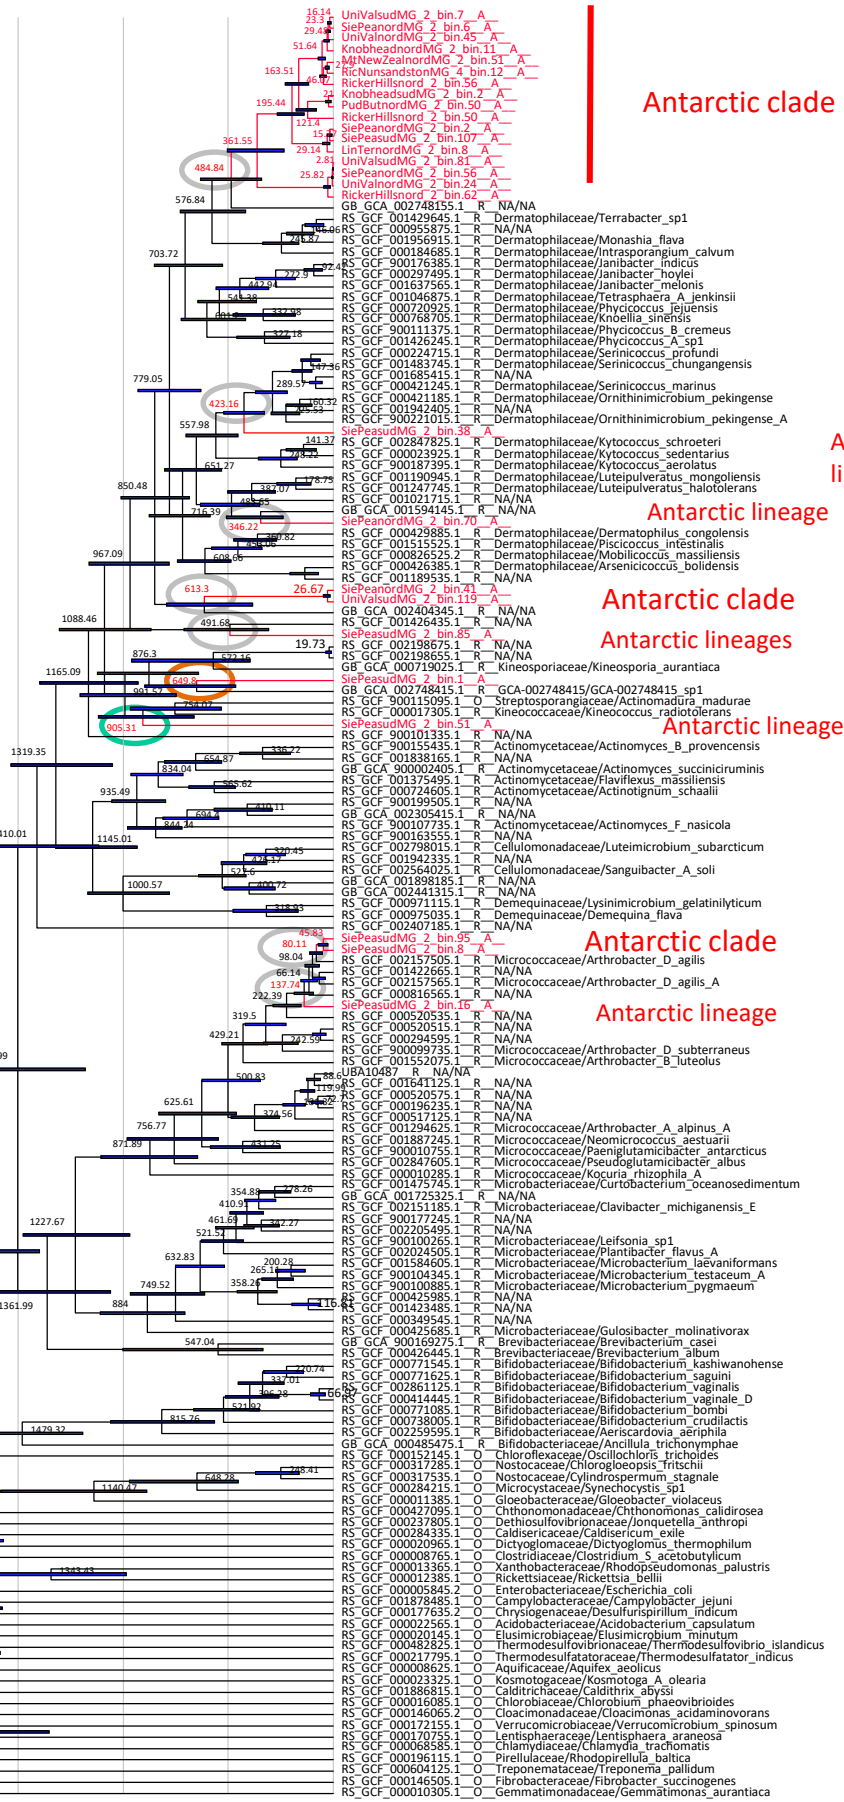

3500.0 3000.0 2500.0 2000.0 1500.0 1000.0 500.0 0.0

# Chitinophagales

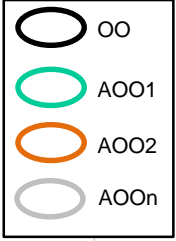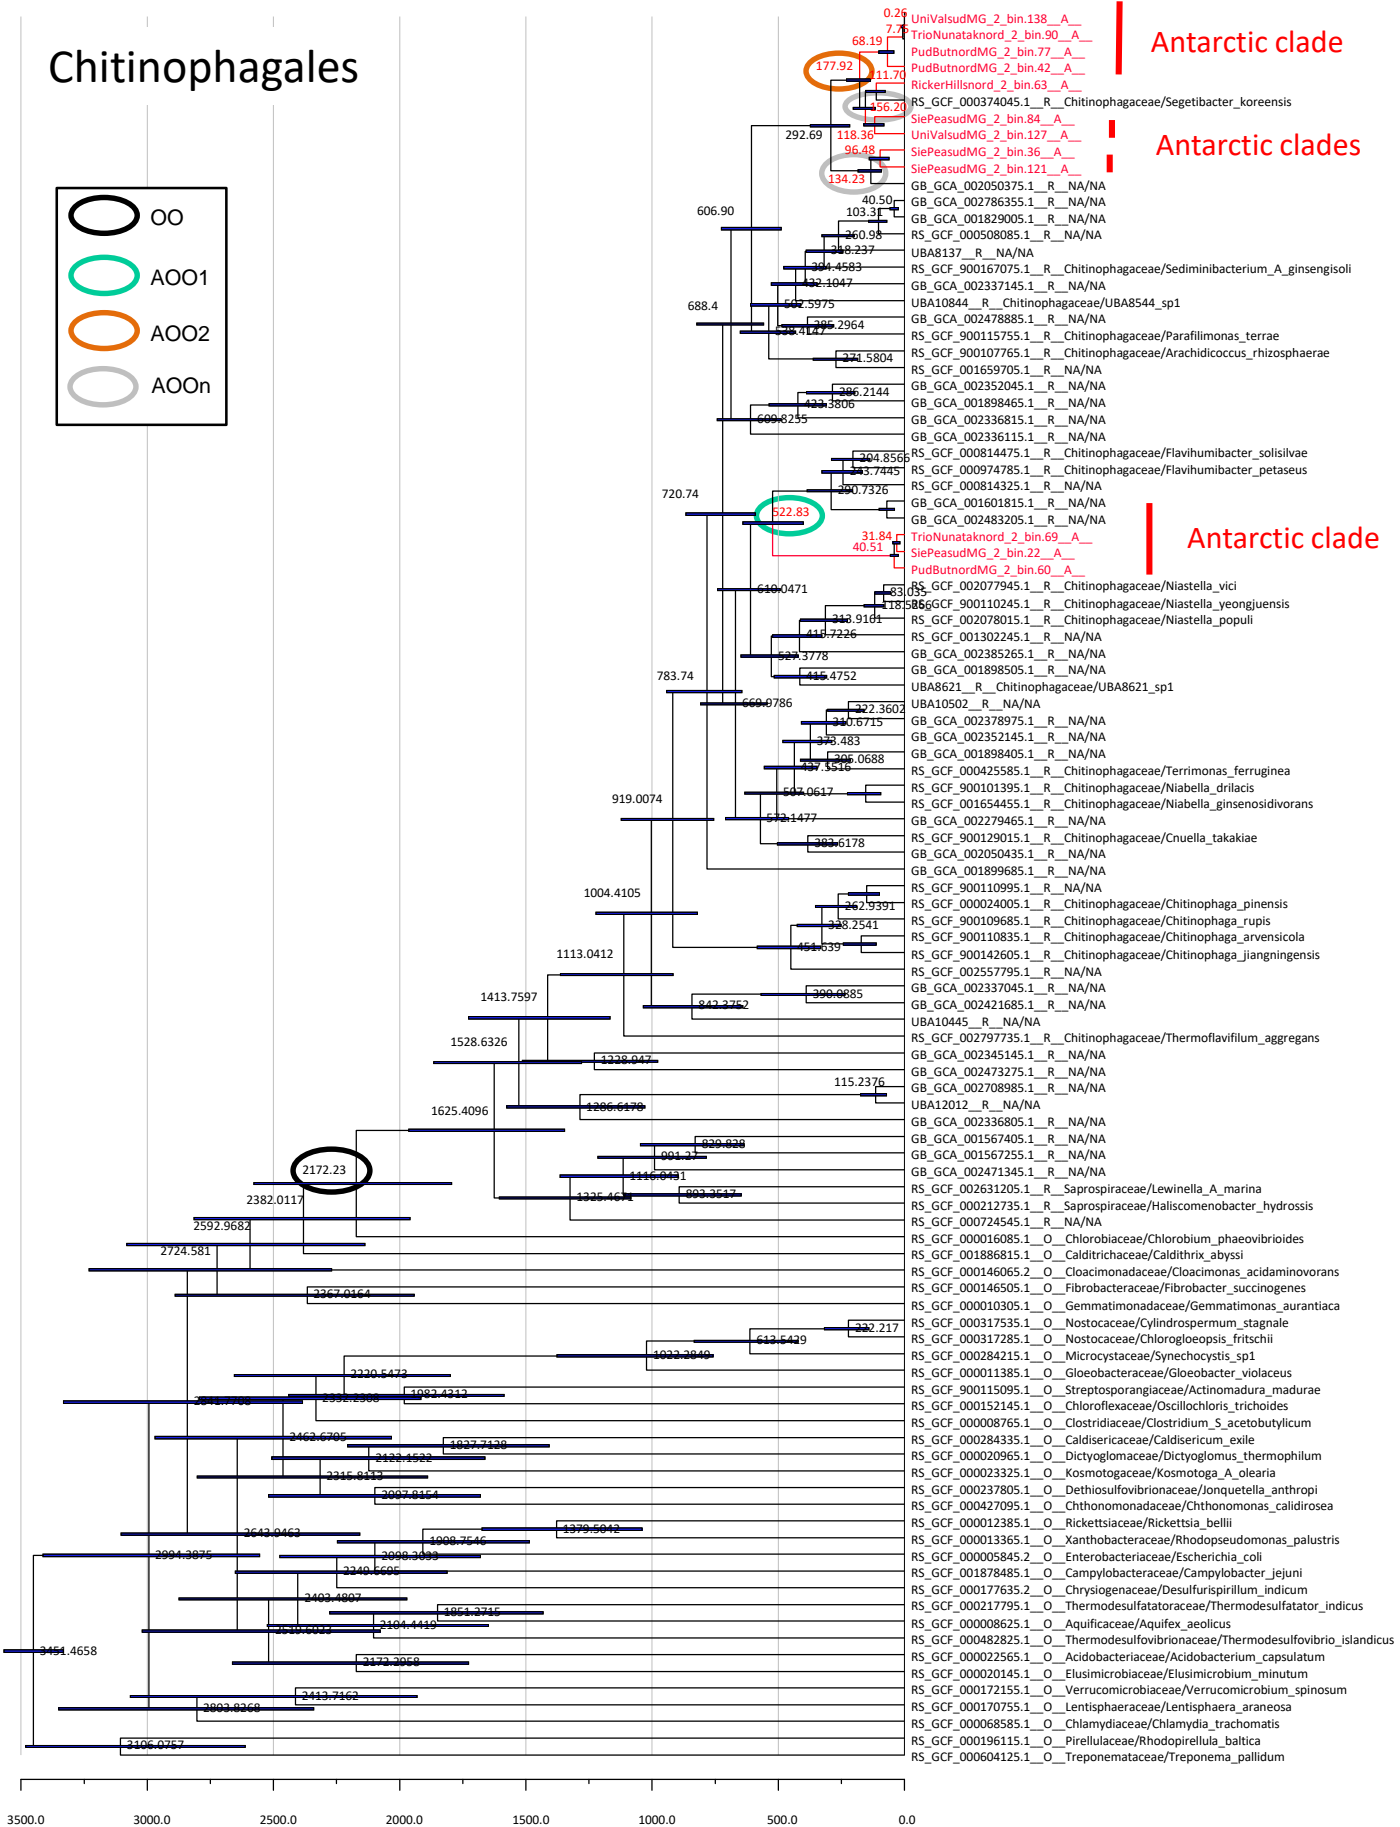



# Corynebacterales

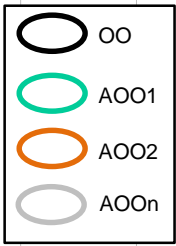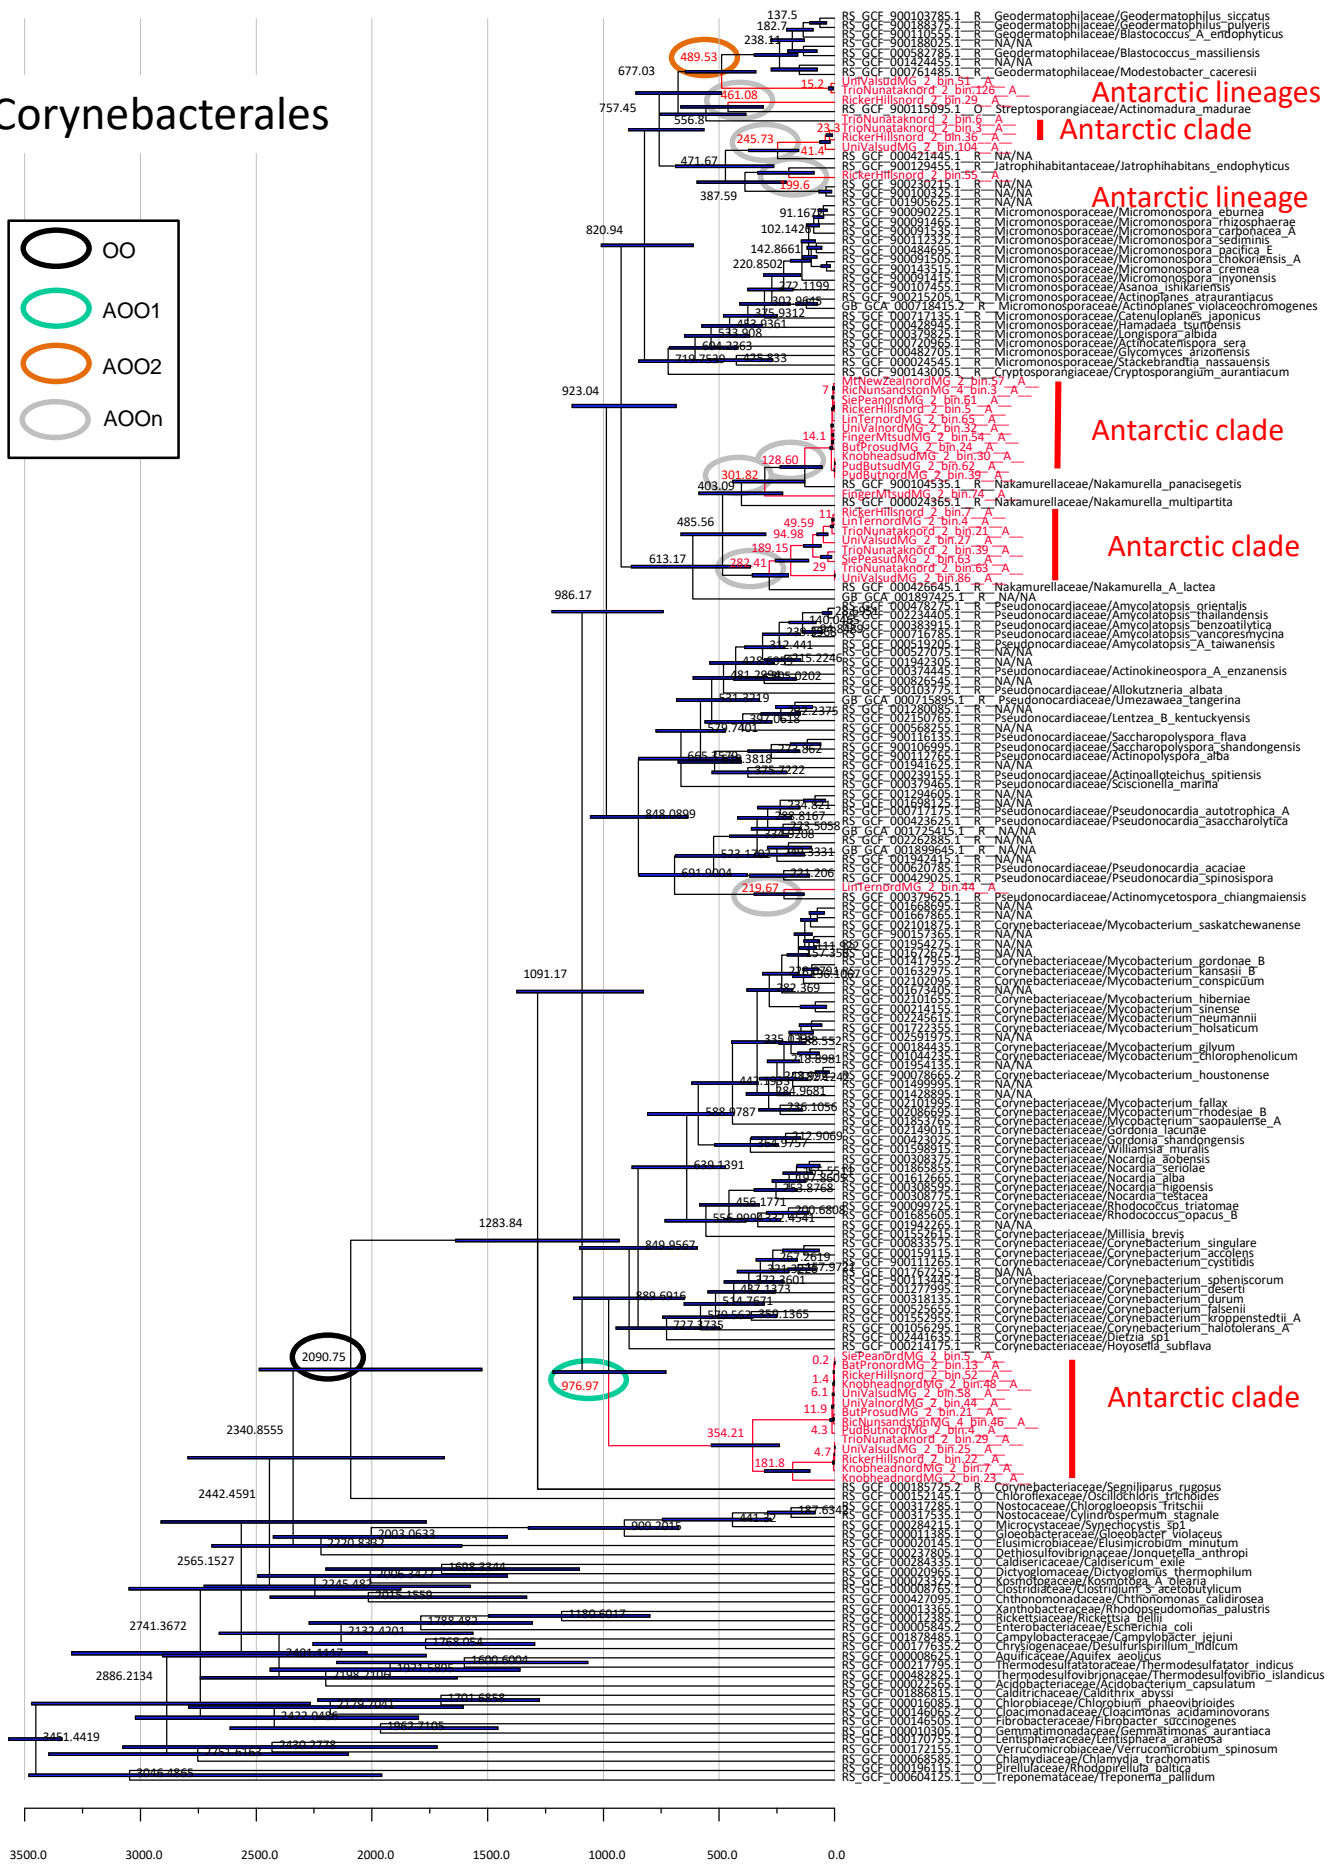

Antarctic lineages

Antarctic clade

Antarctic lineage

Antarctic clade

Antarctic clade

Antarctic clade



# Frankiales

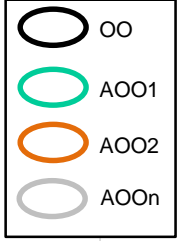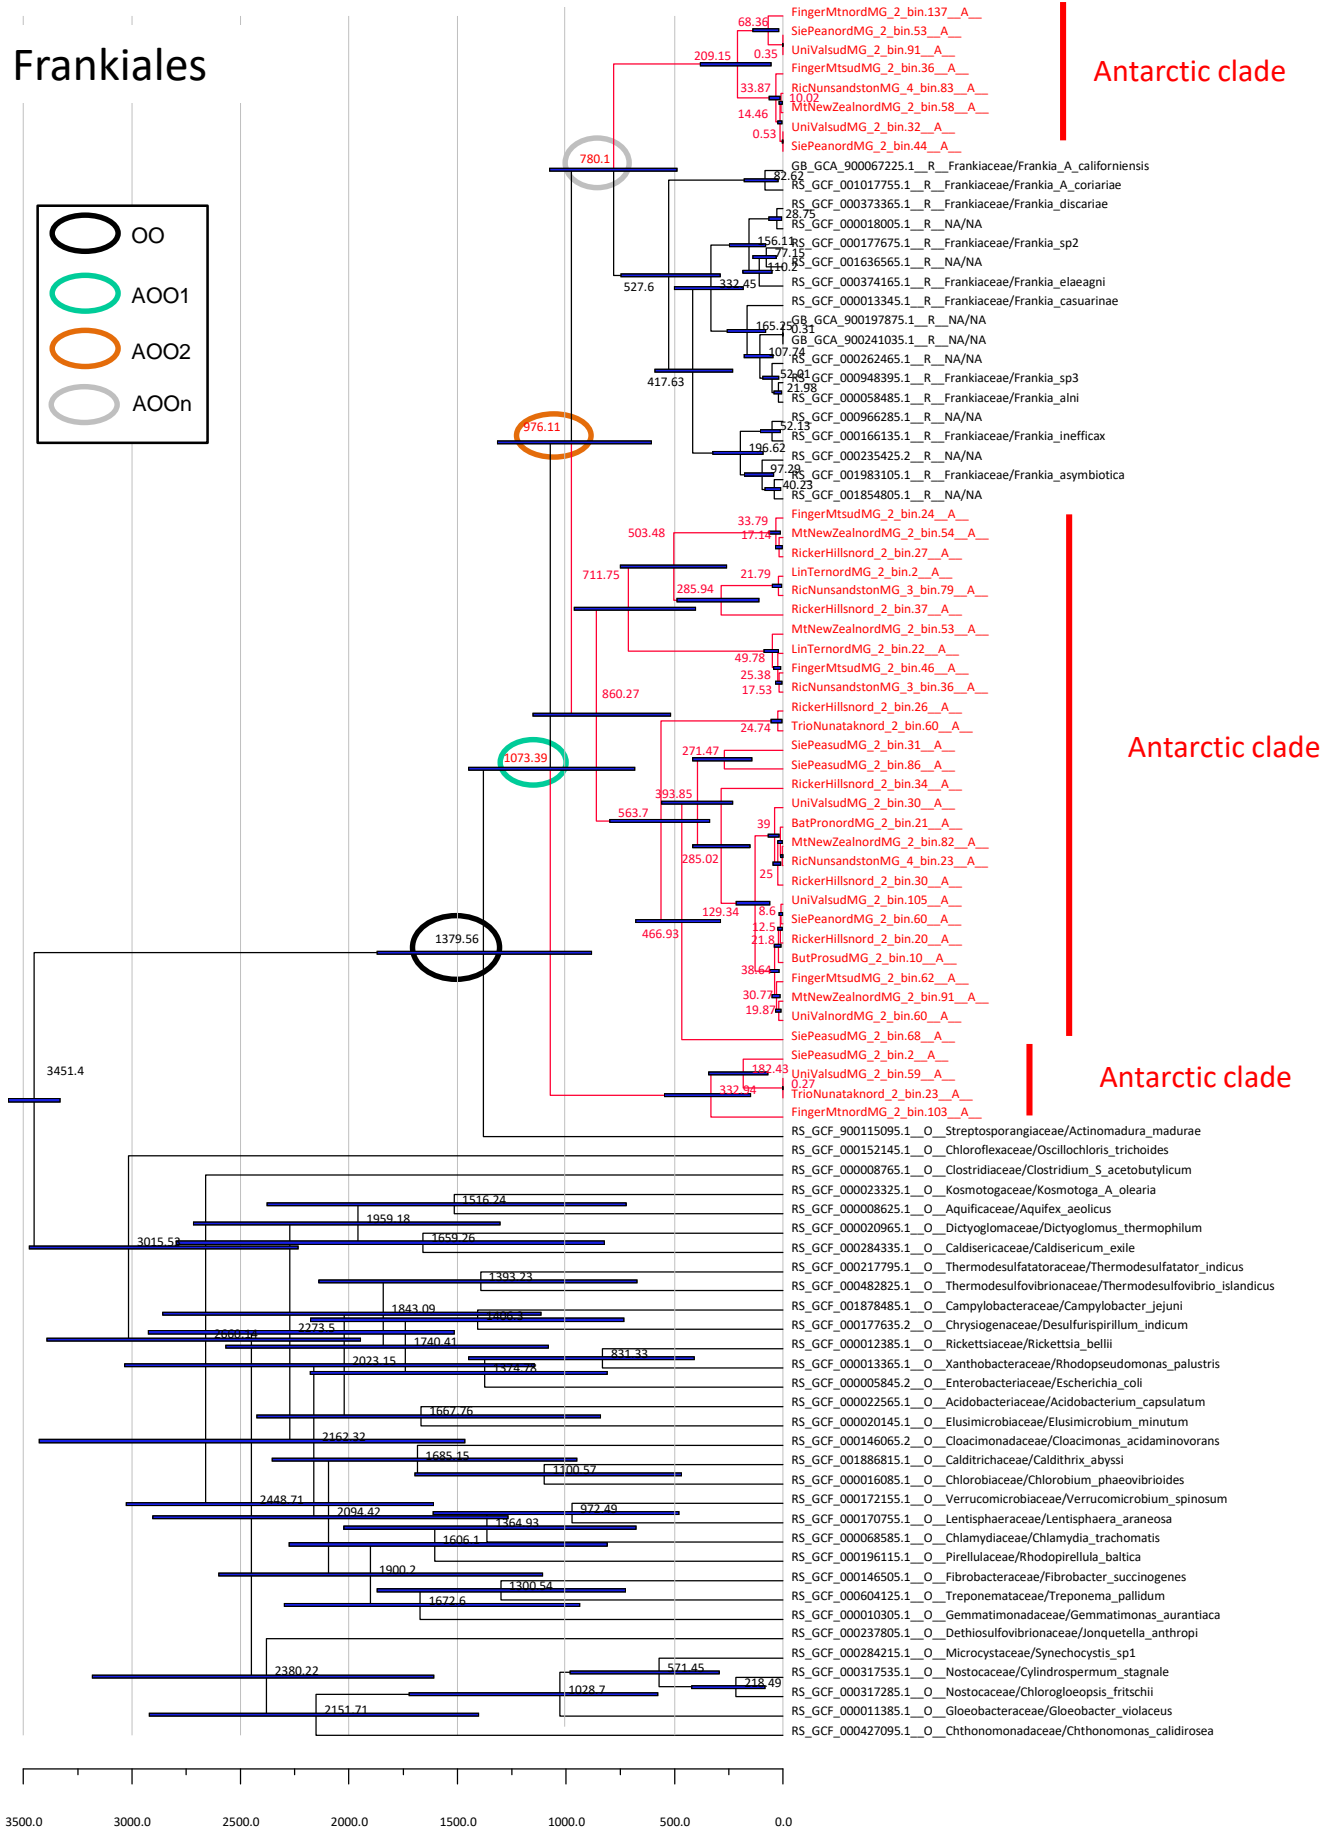



# Isosphaerales

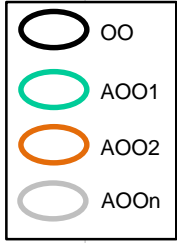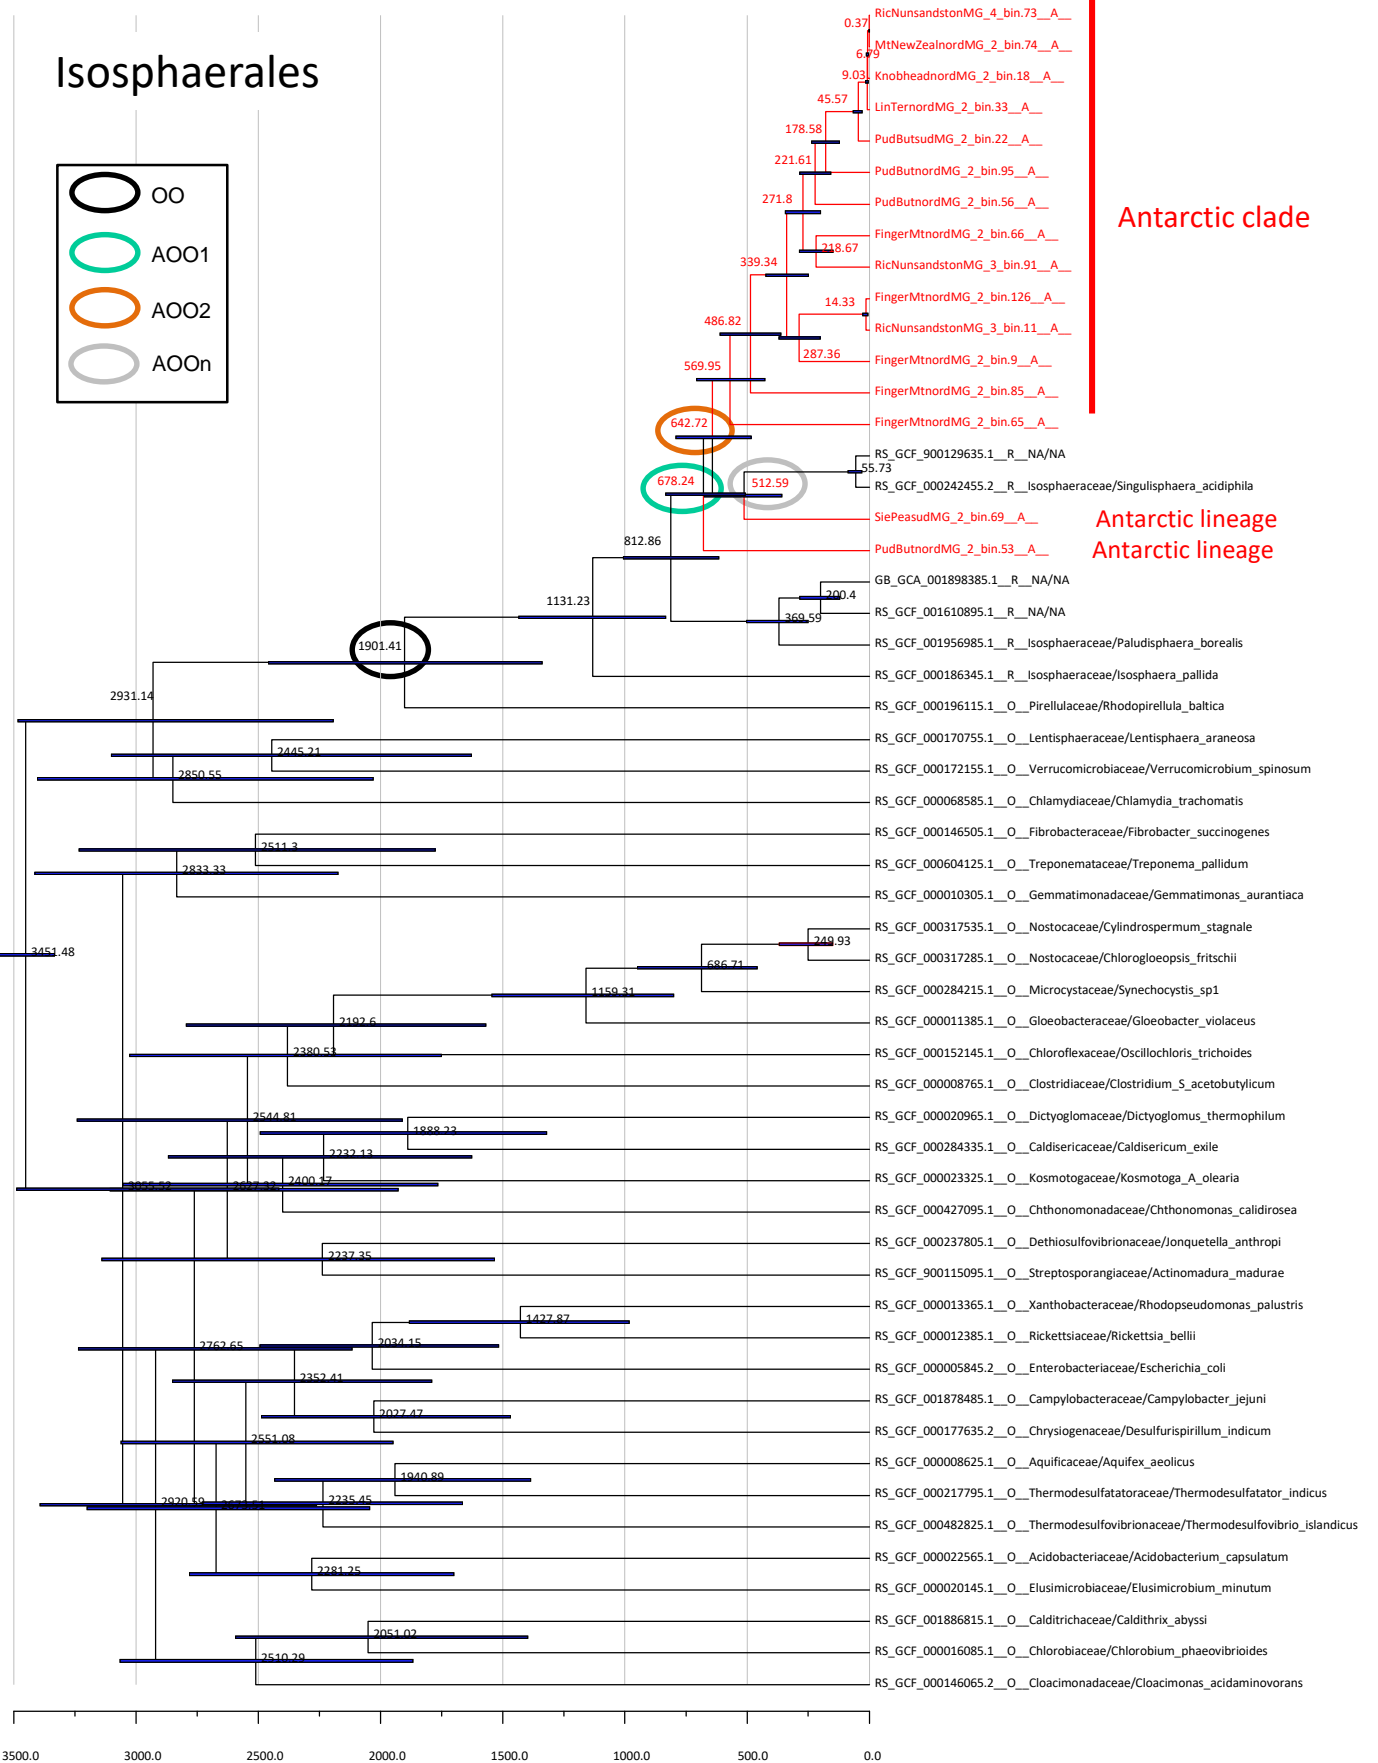

Antarctic clade

Antarctic lineage  
Antarctic lineage

# Jangellales

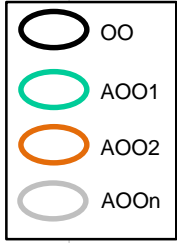

Antarctic clade

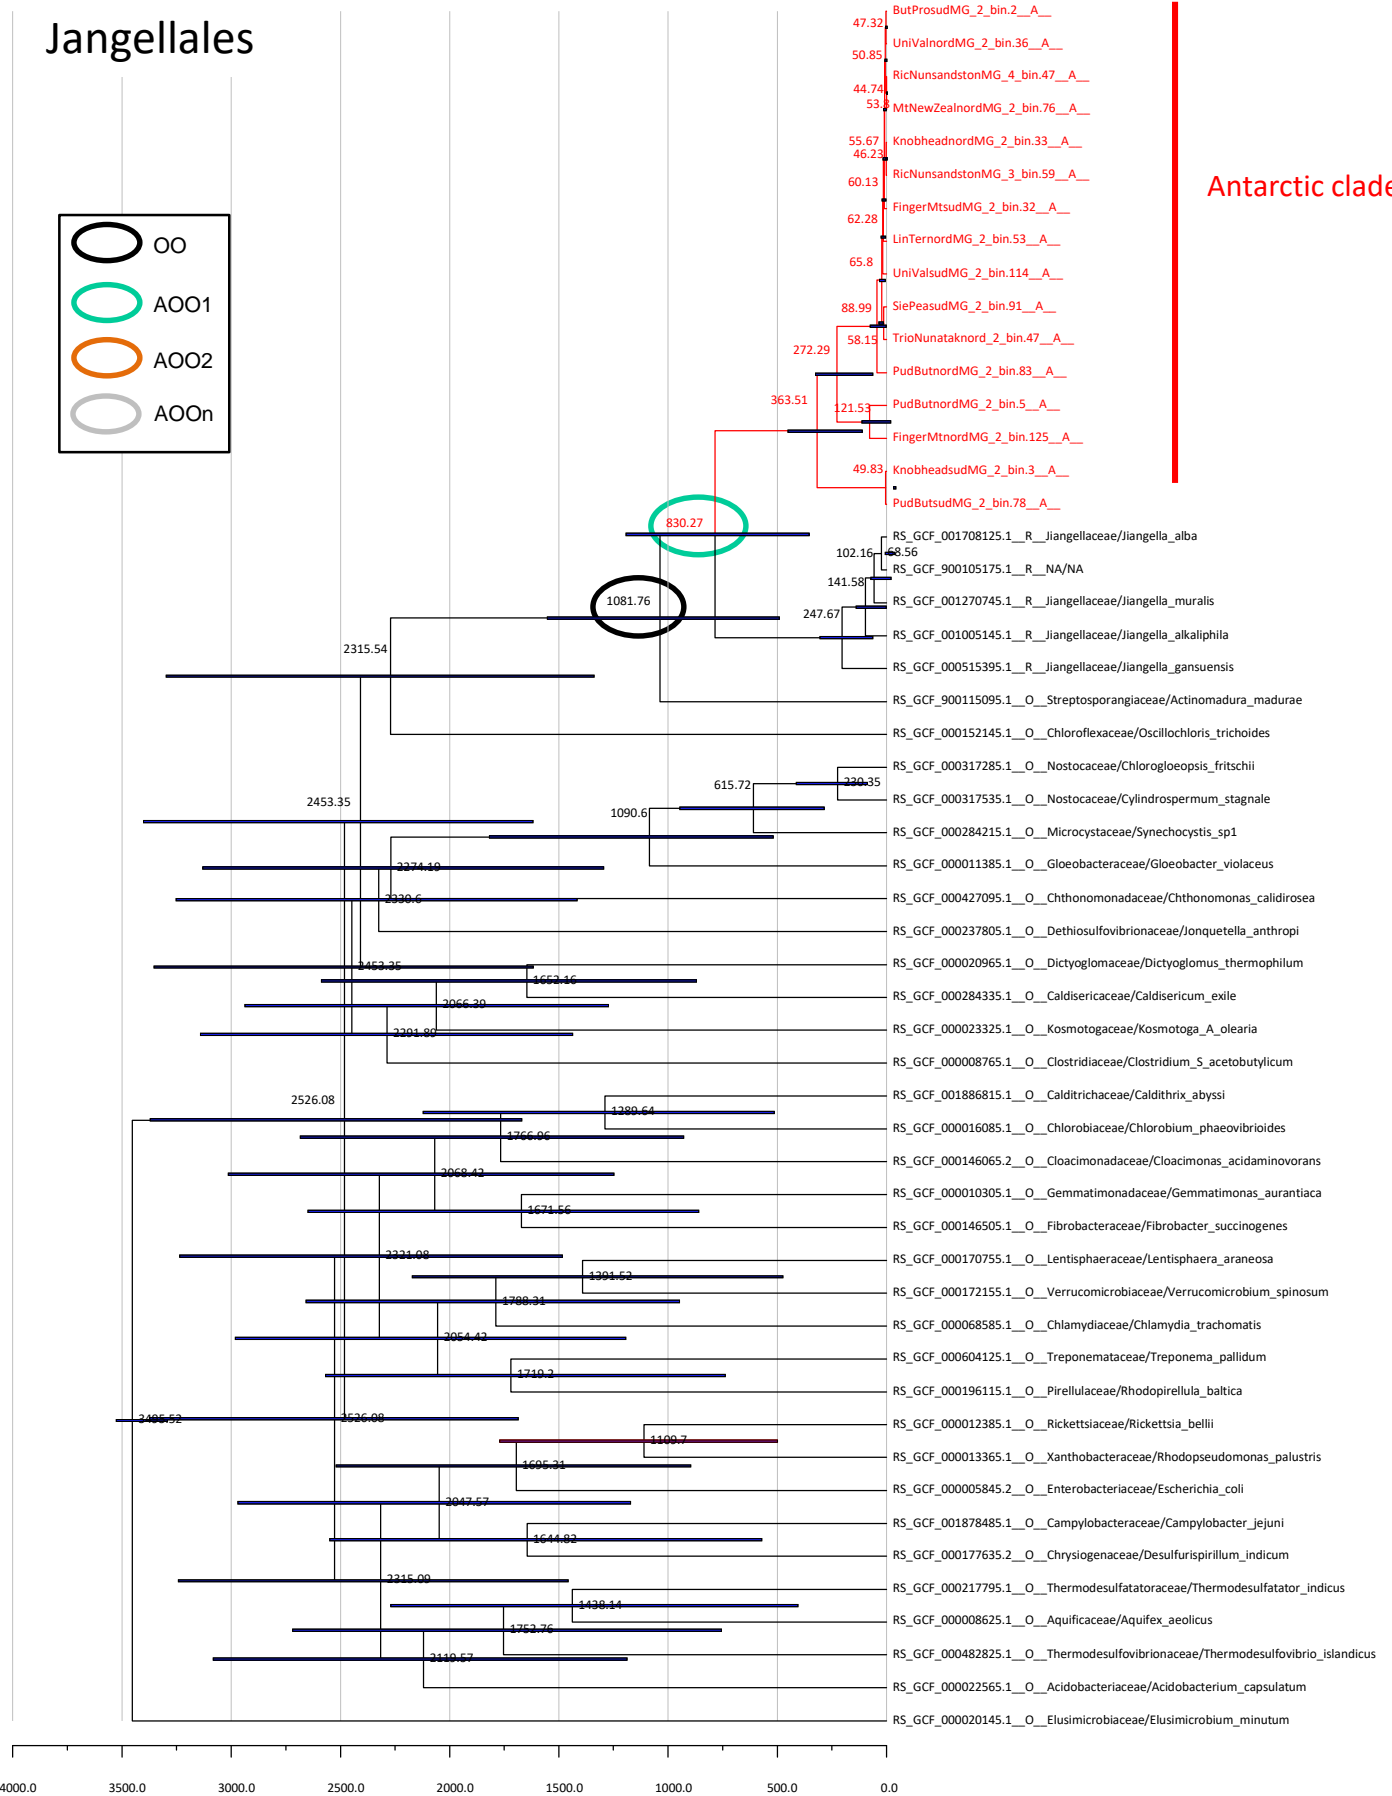

# Ktedonobacterales

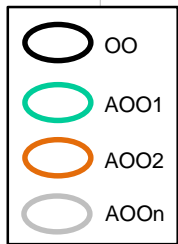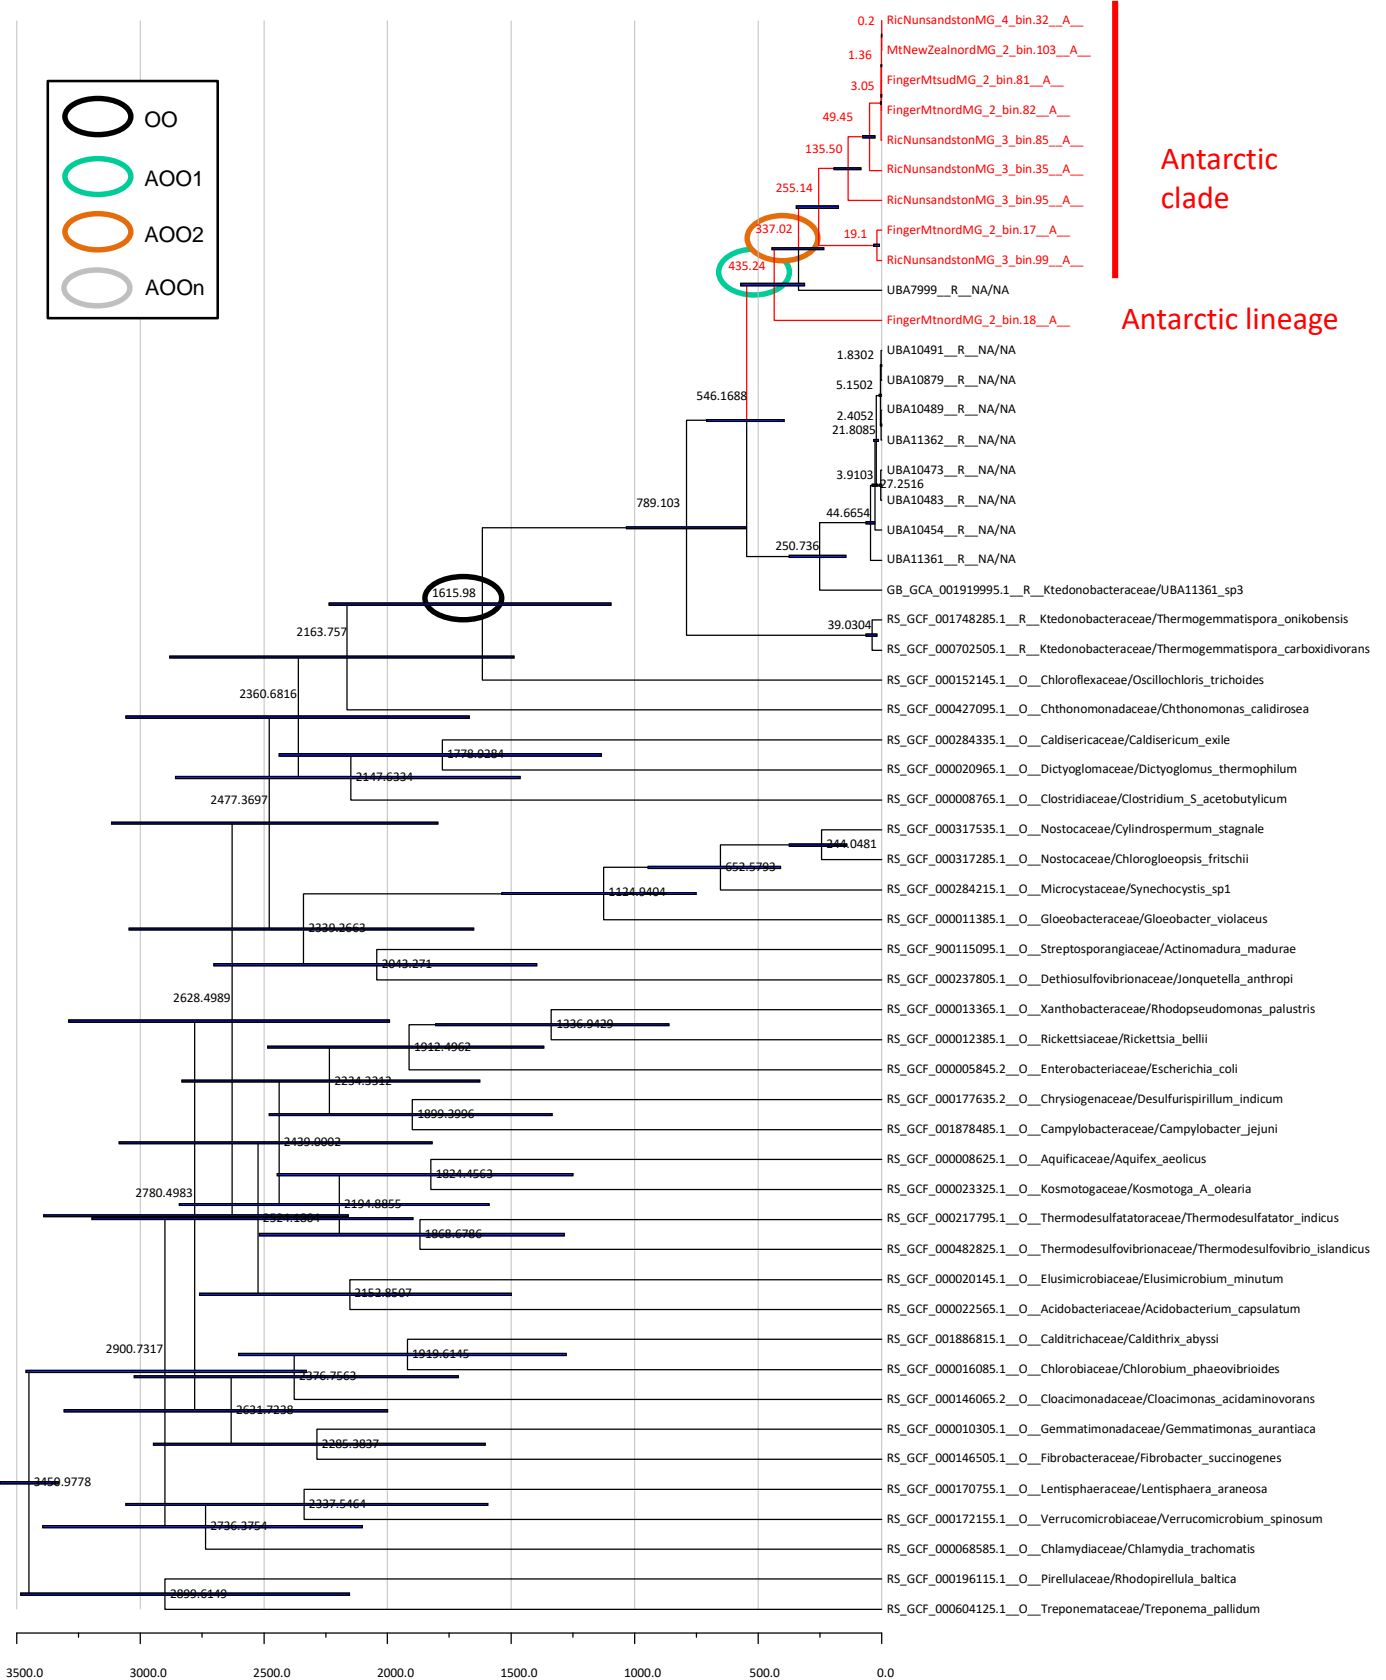

# Microtrichales

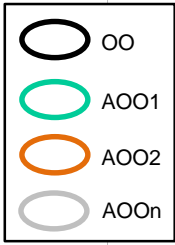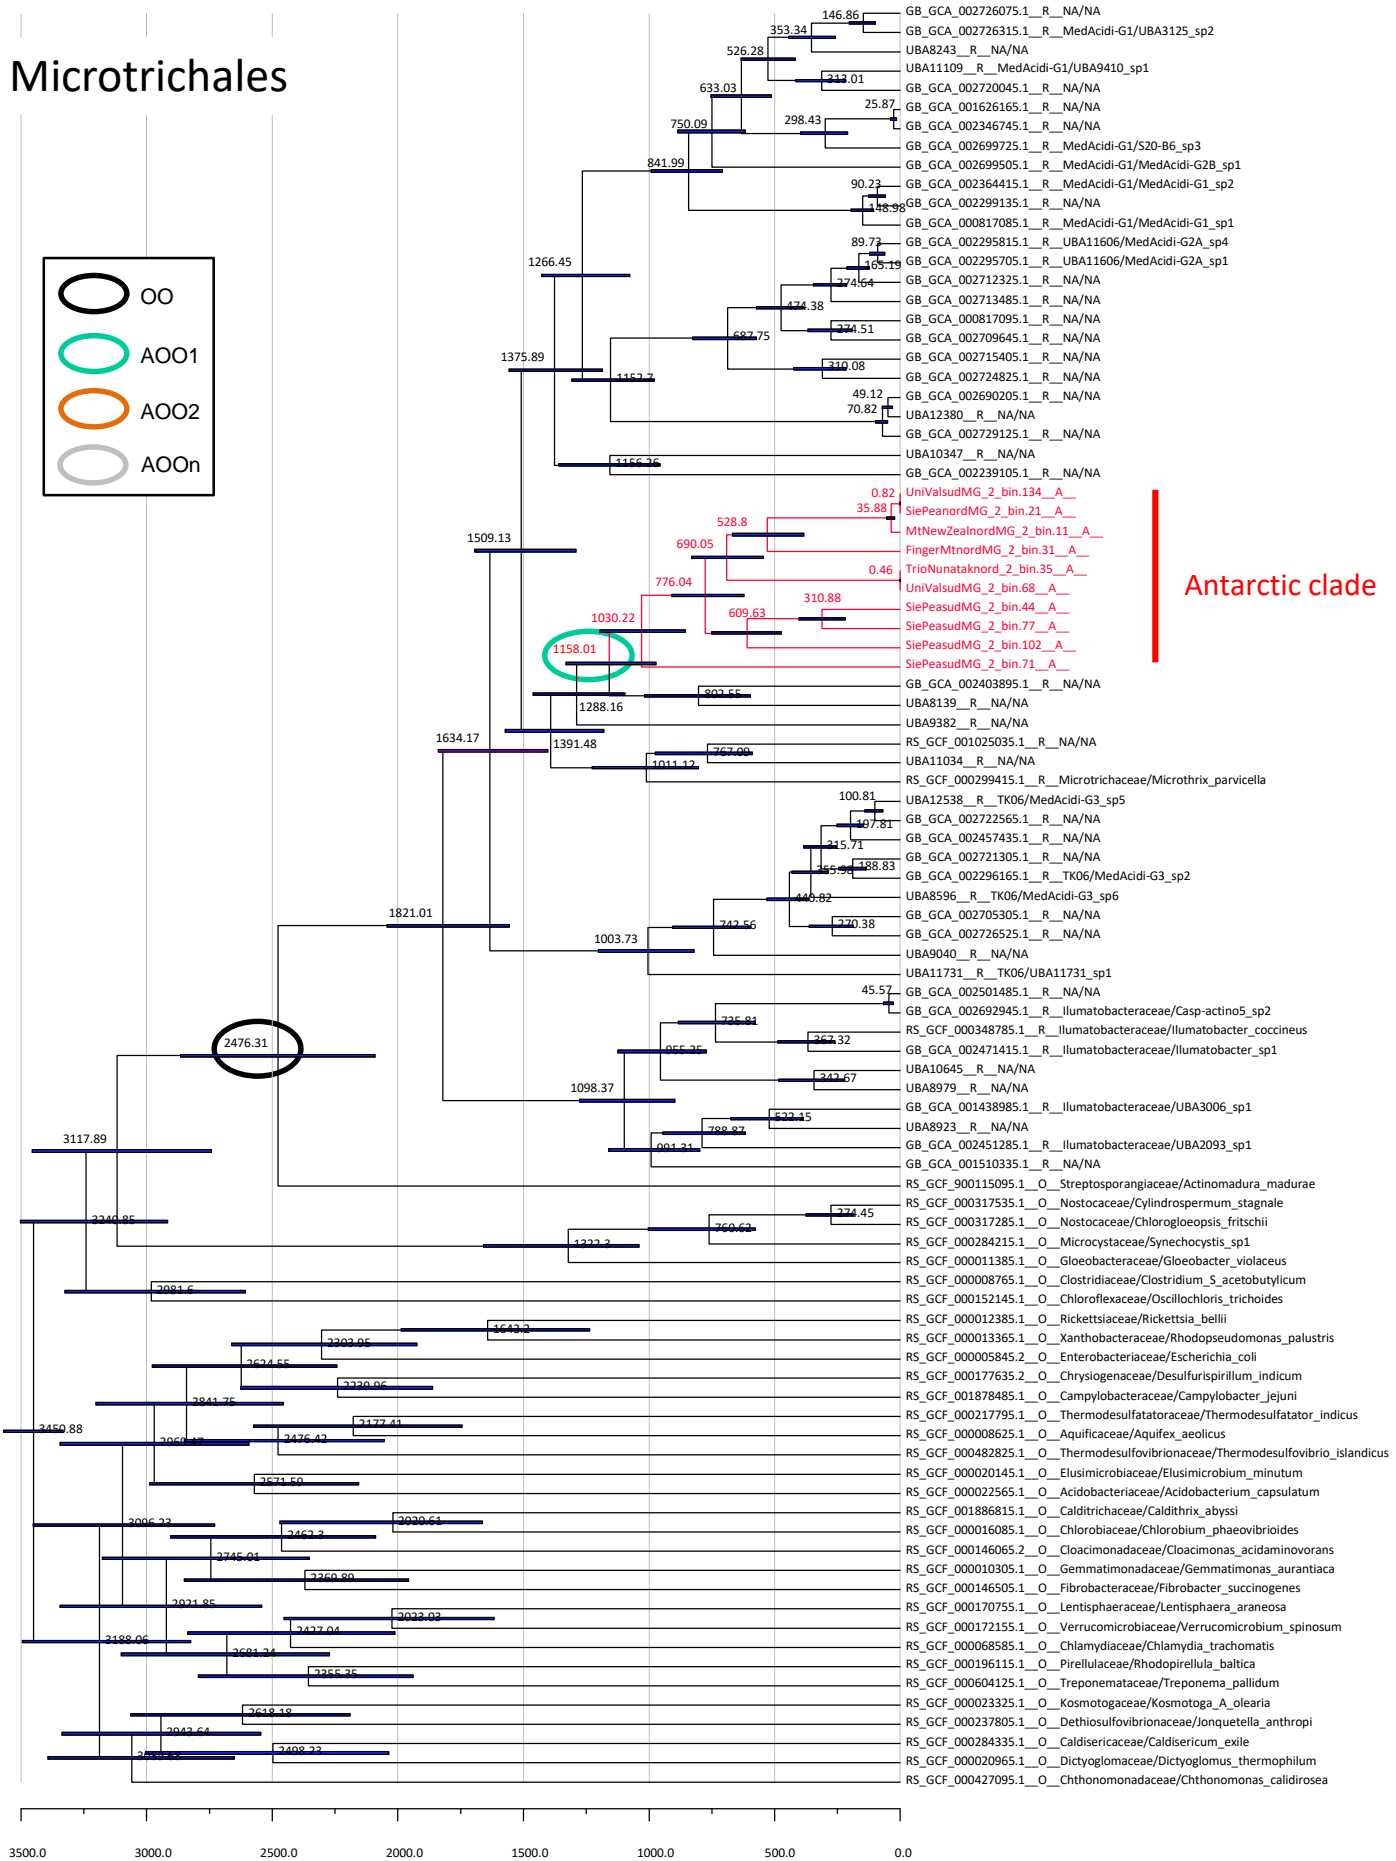

Antarctic clade

# Propionibacteriales

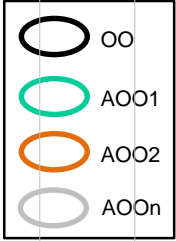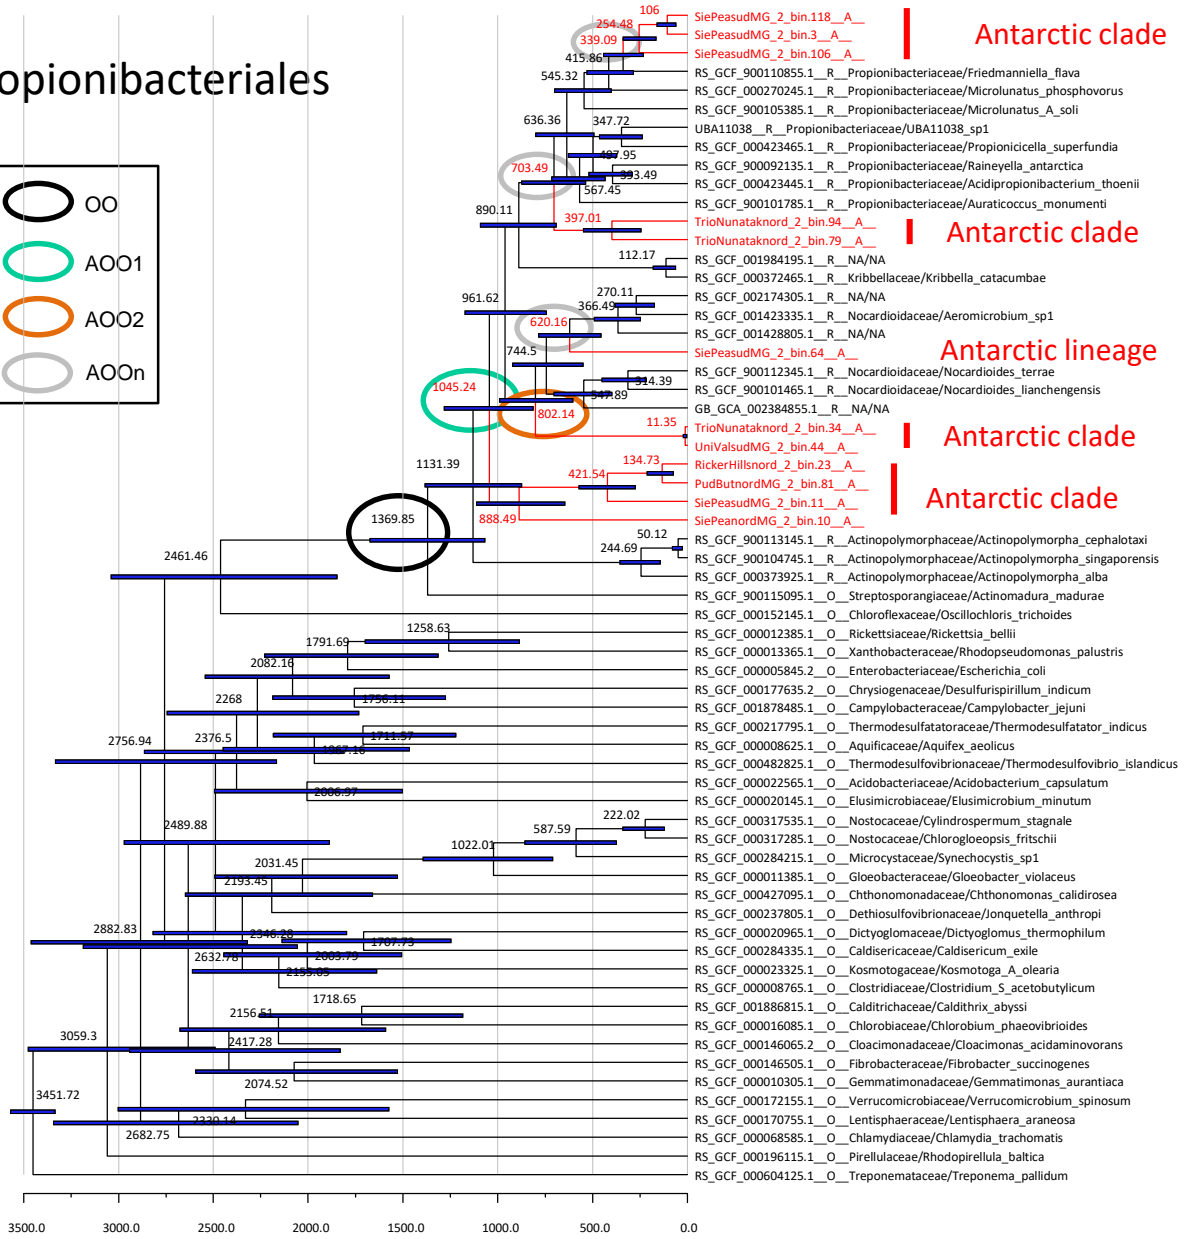



# Pyrinomonadales

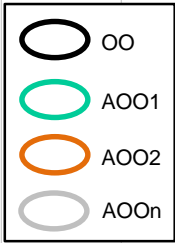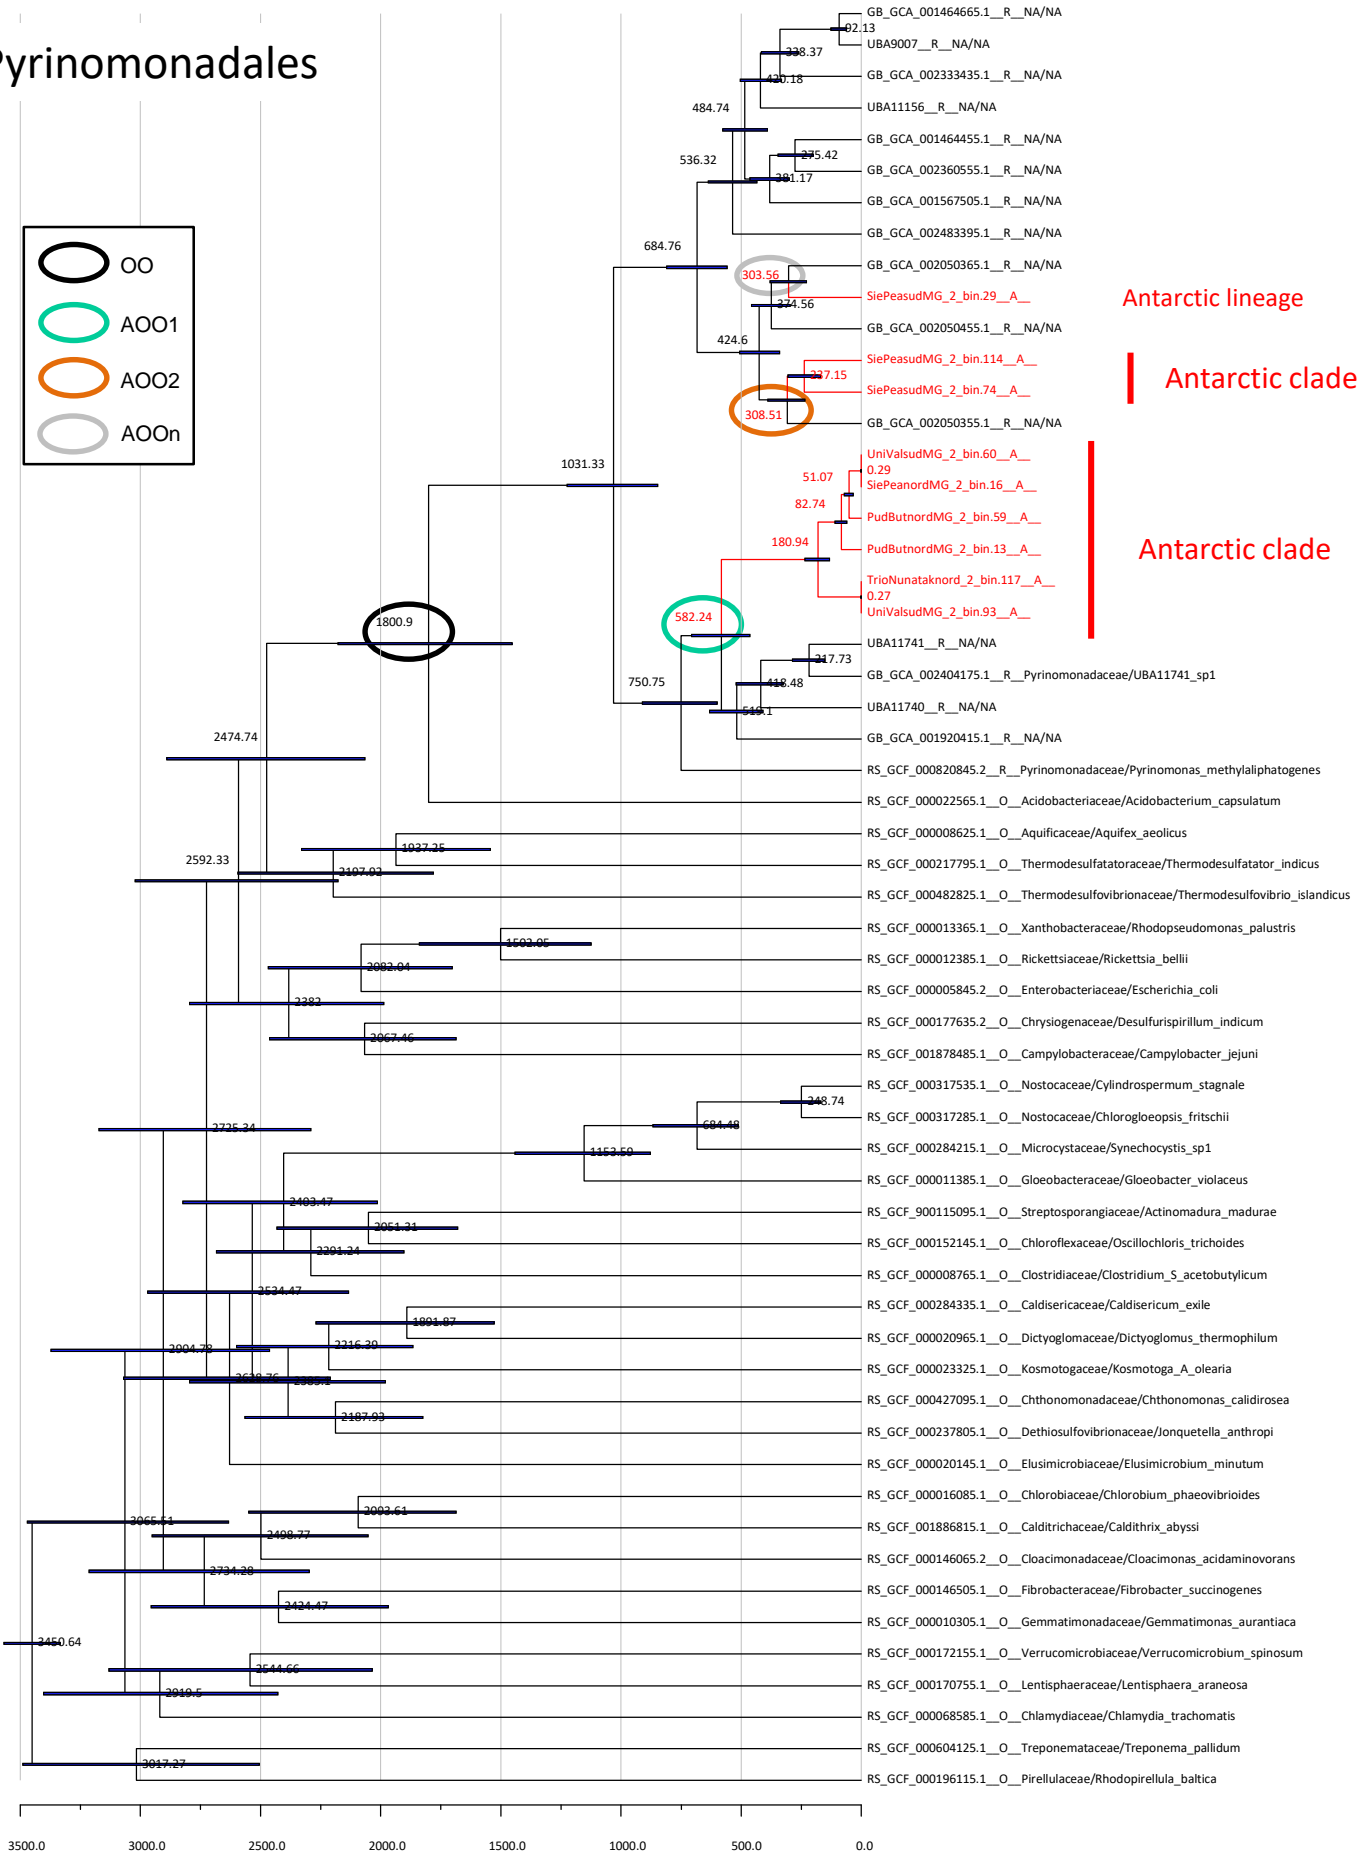

# Solibacterales

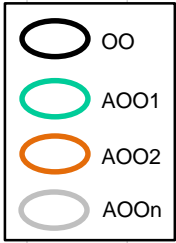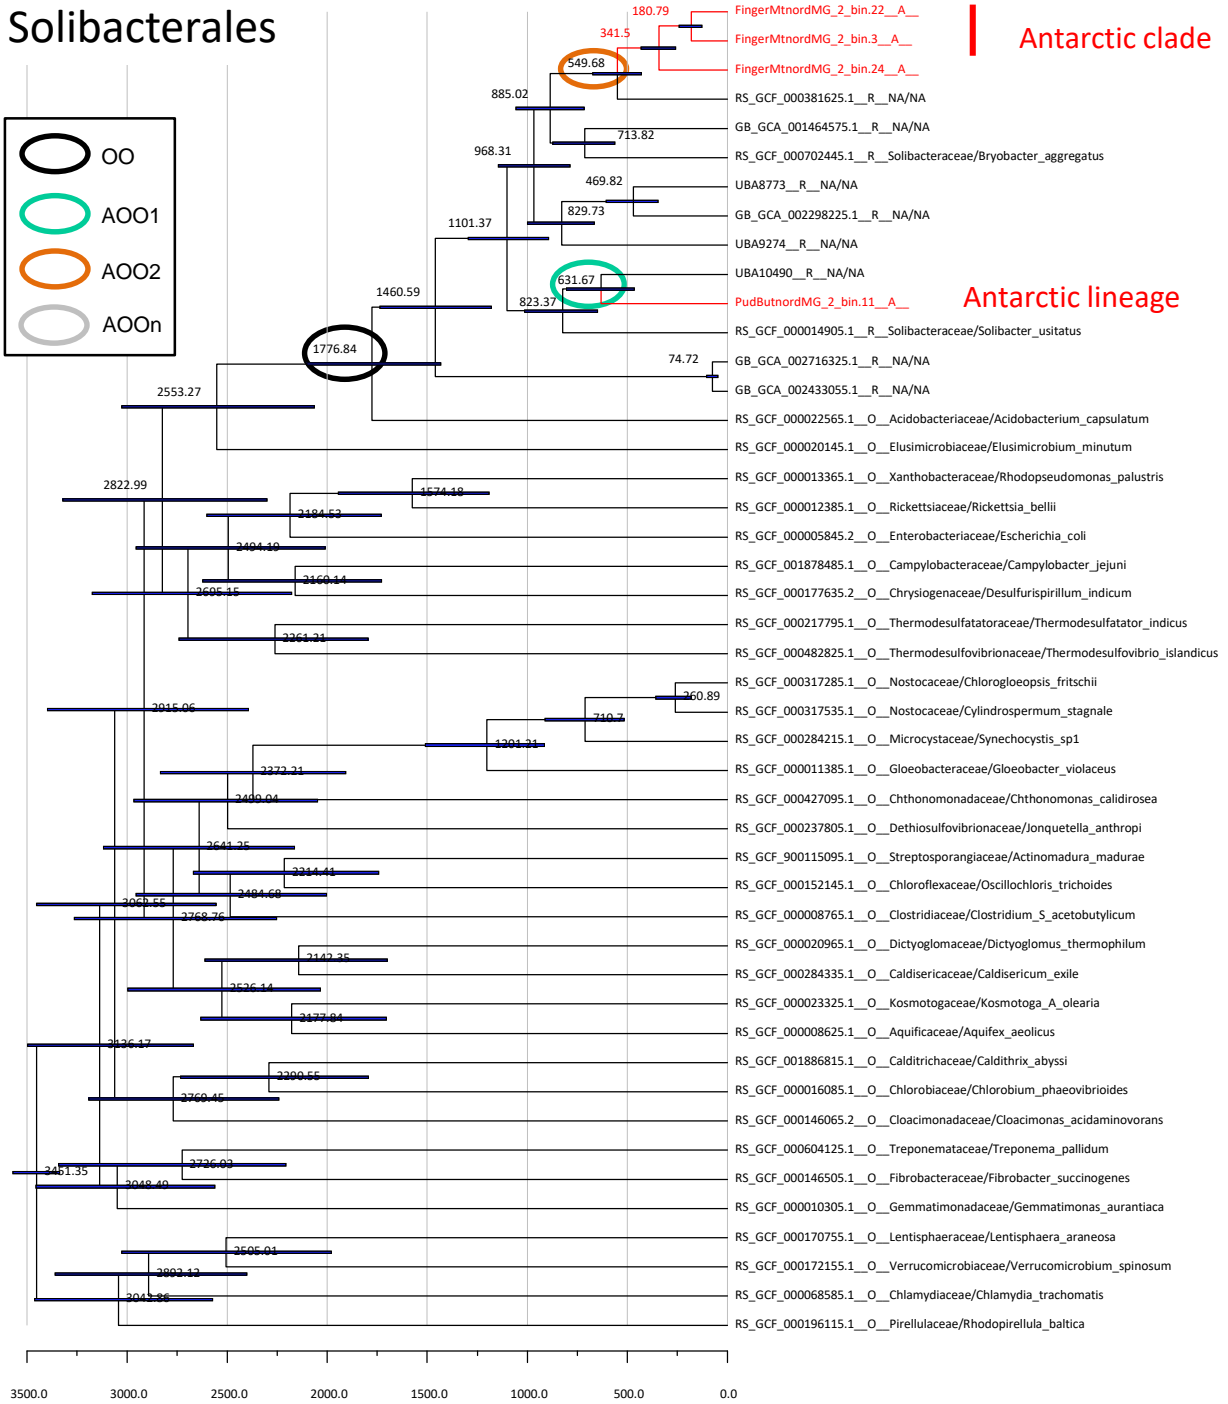

# Solirubrobacterales

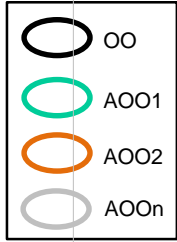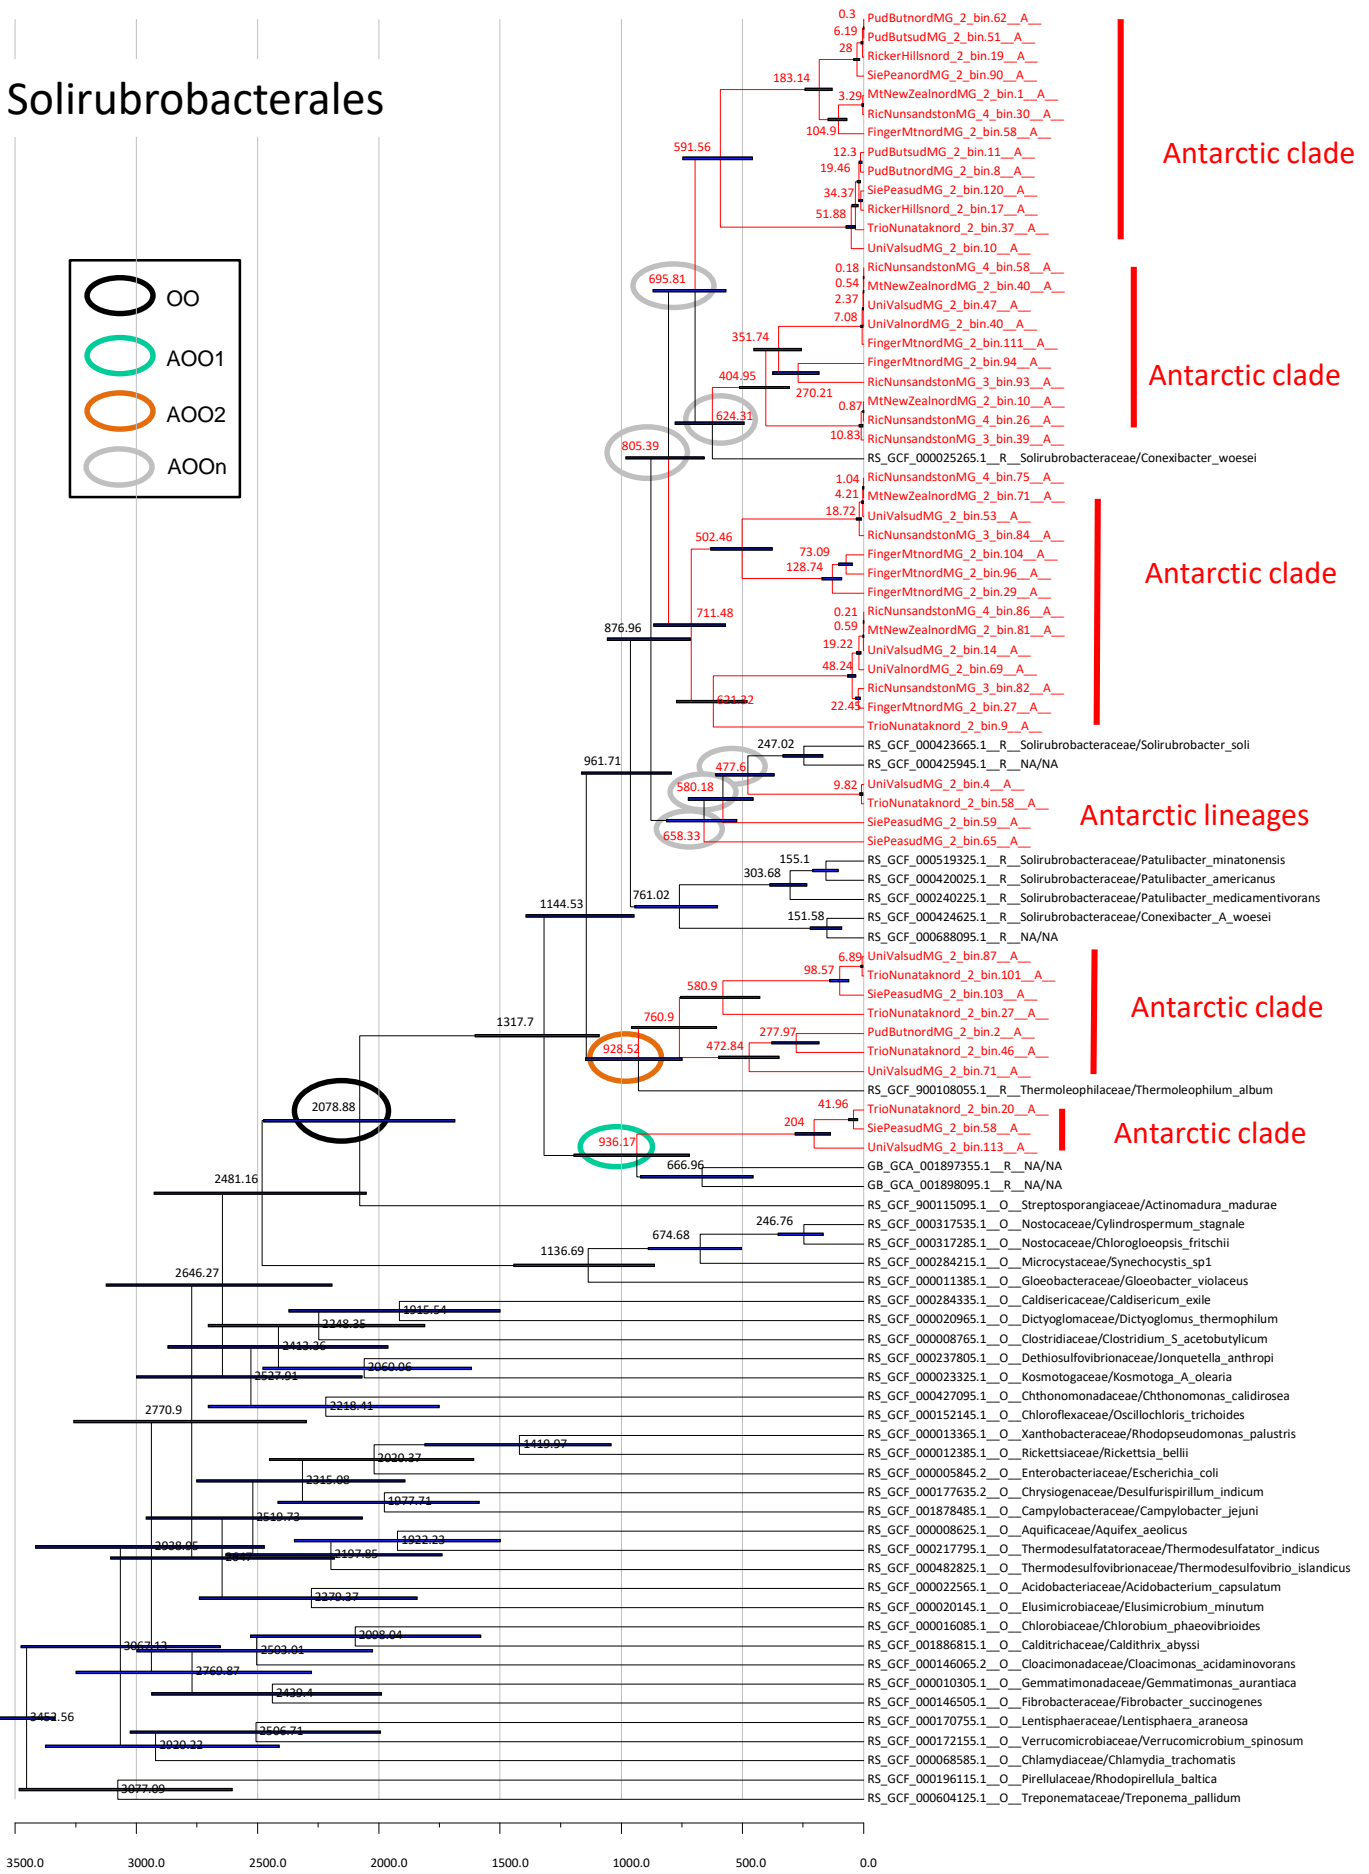

# Sphingobacteriales

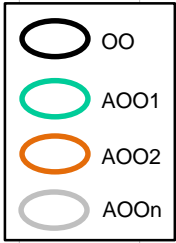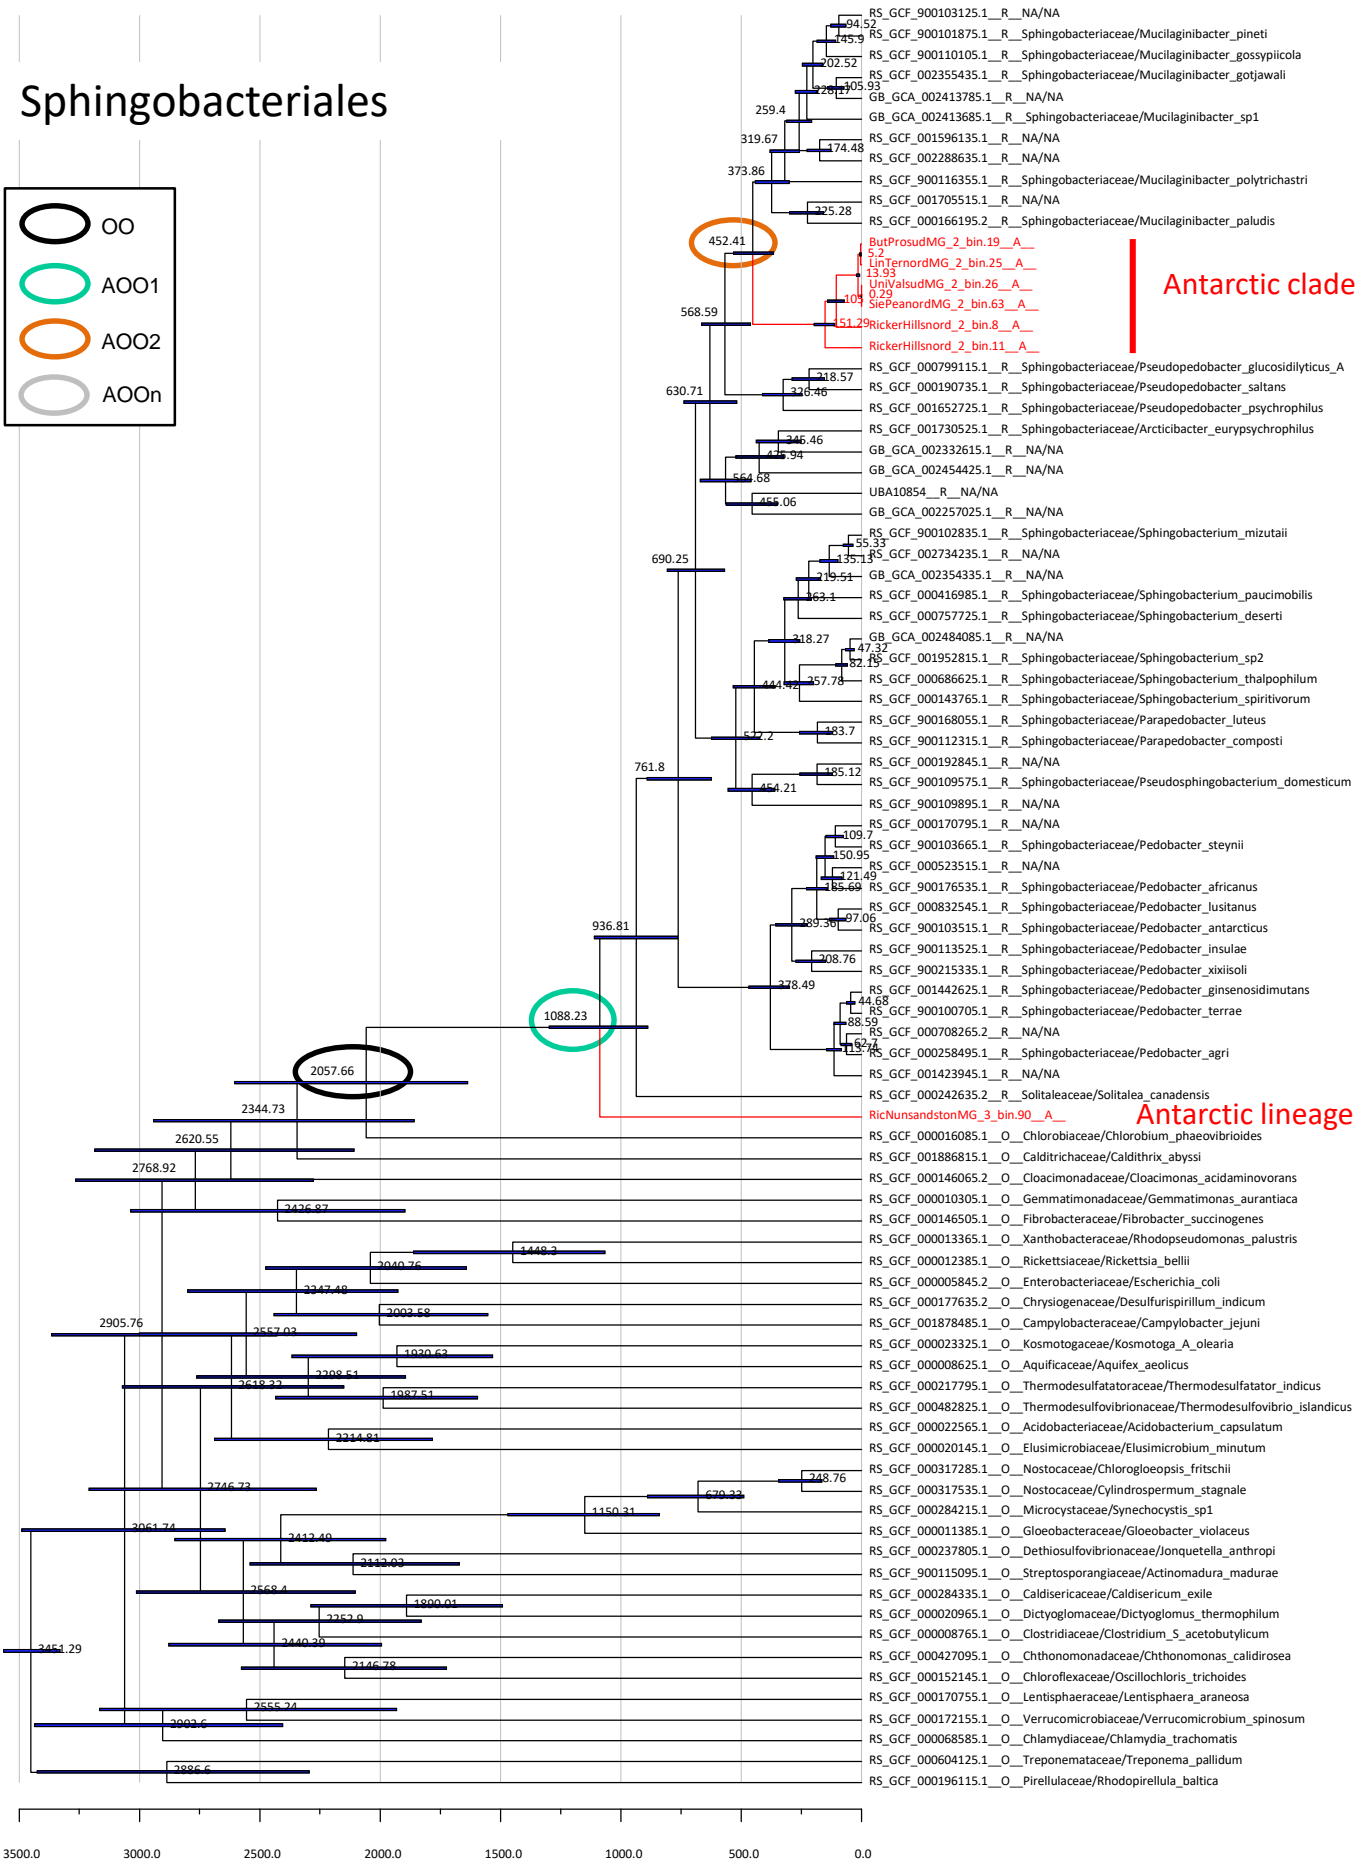

Antarctic clade

Antarctic lineage

3500.0 3000.0 2500.0 2000.0 1500.0 1000.0 500.0 0.0

# Sphingomonadales

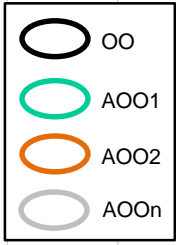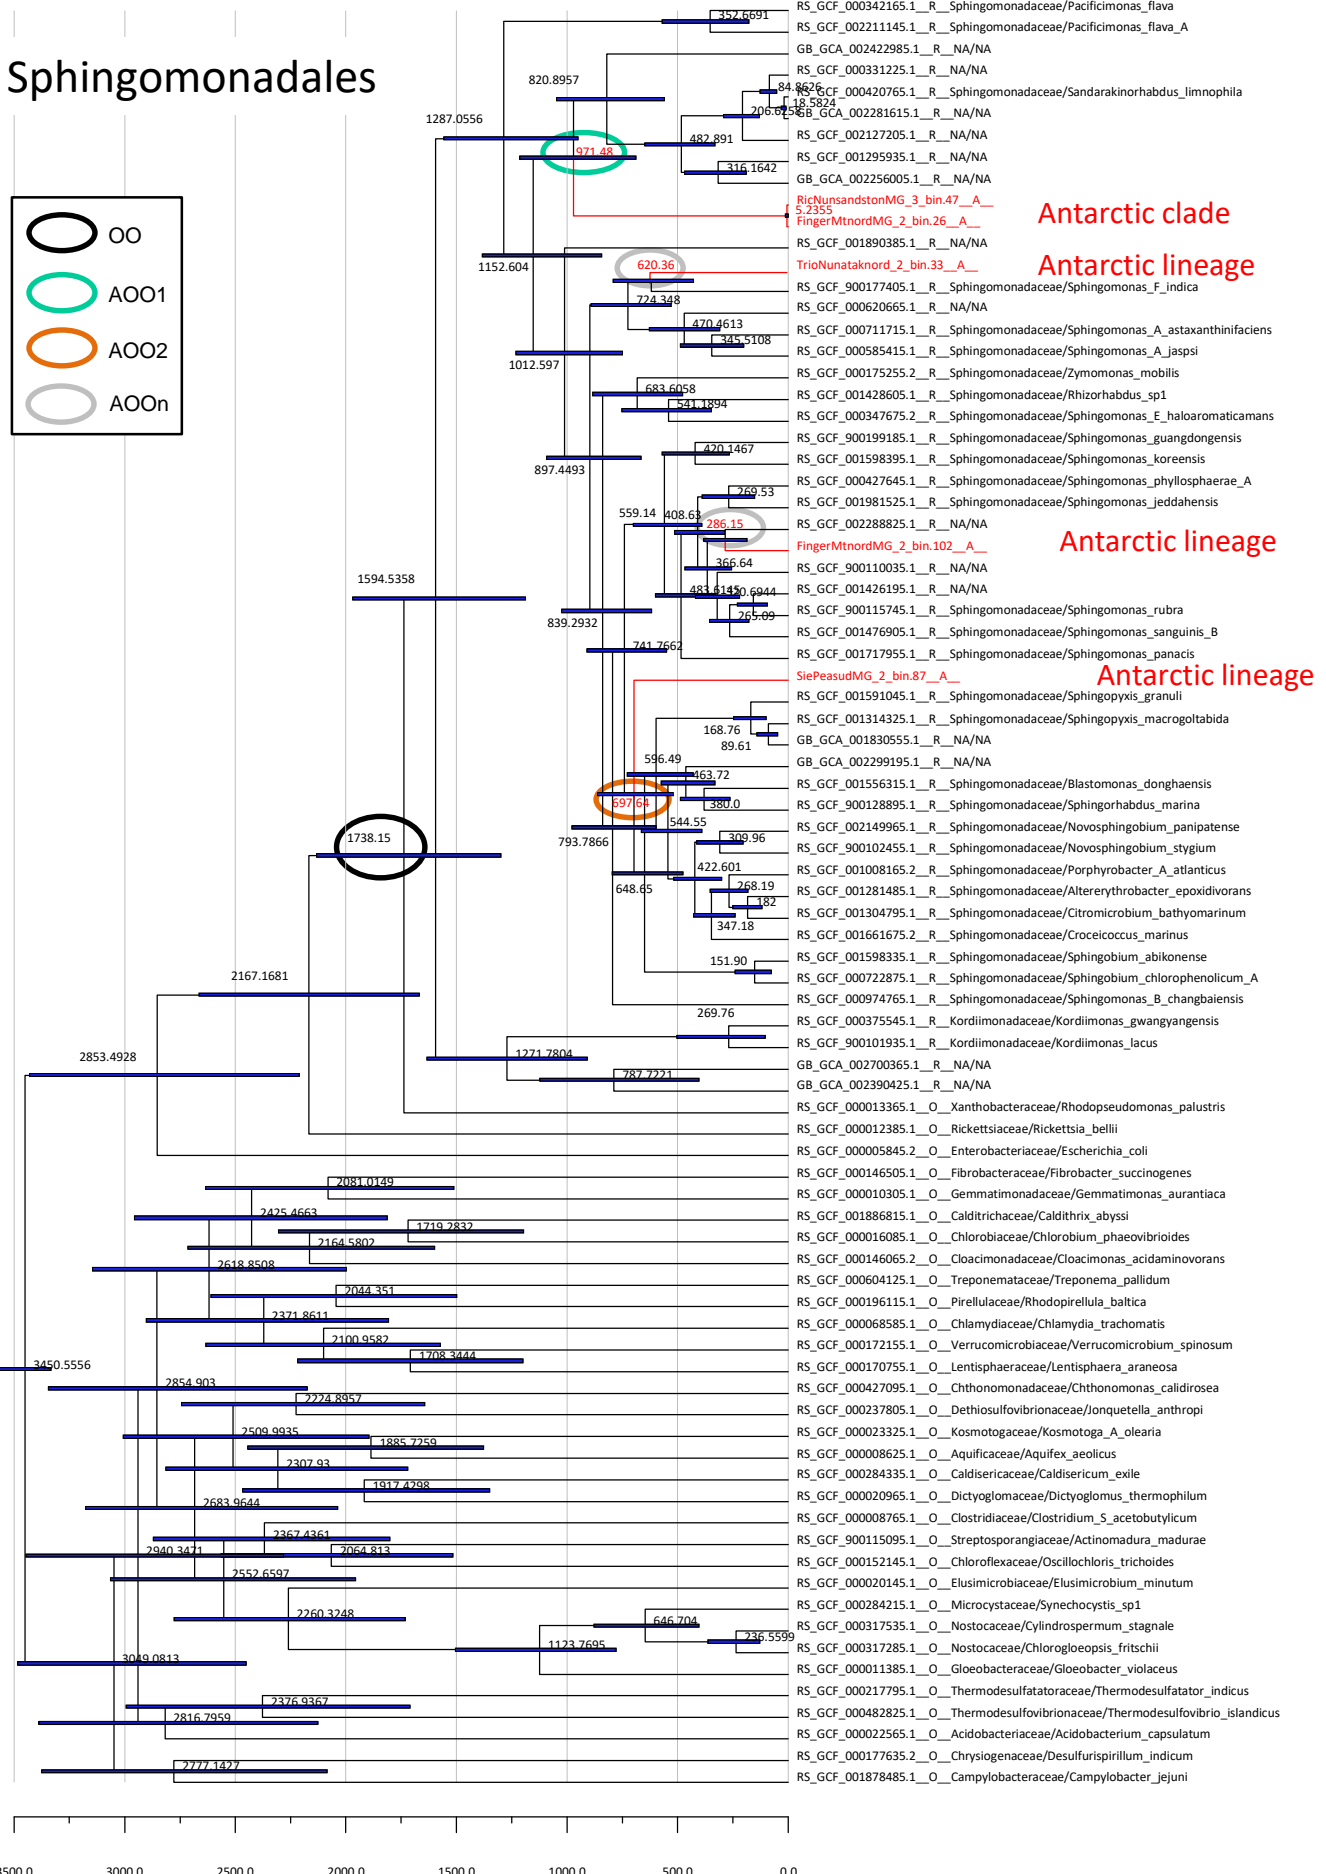

3500.0 3000.0 2500.0 2000.0 1500.0 1000.0 500.0 0.0



# Thermomicrobiales

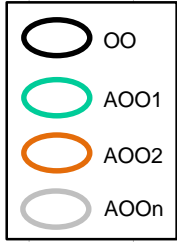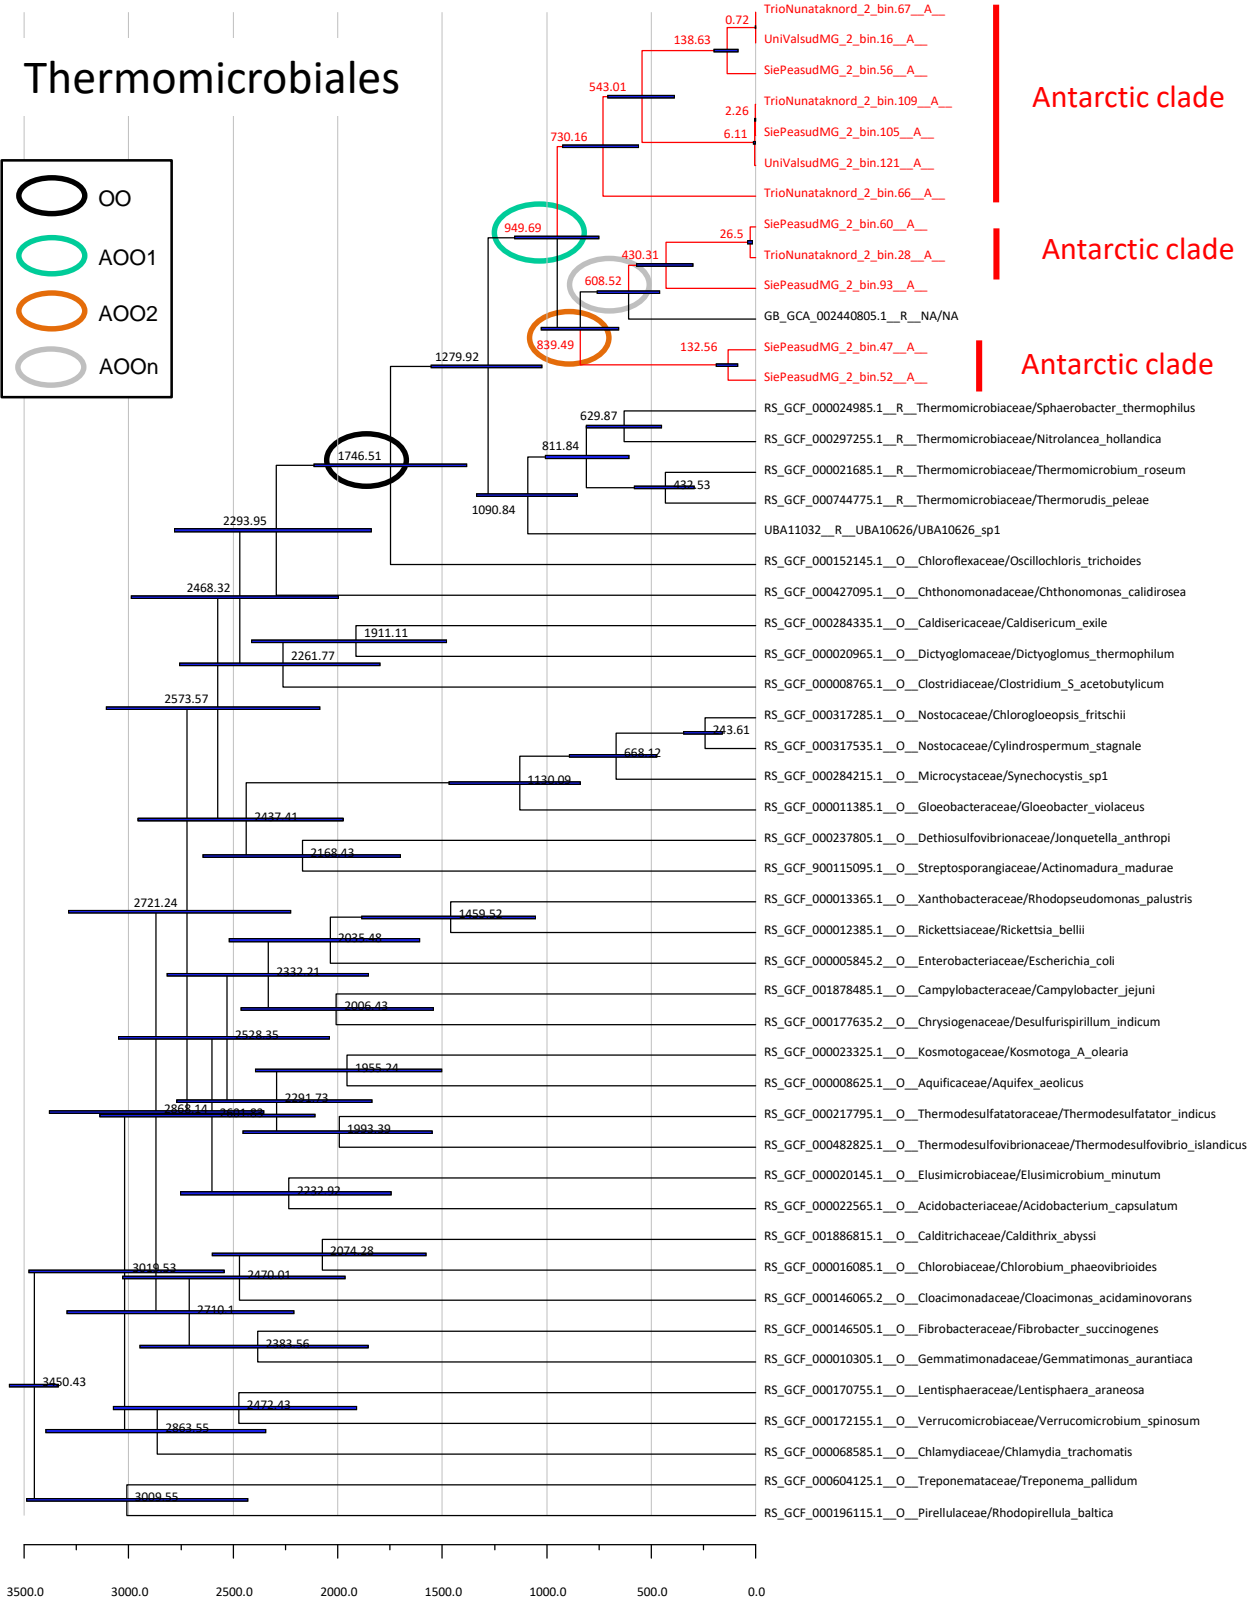

# Uba5184

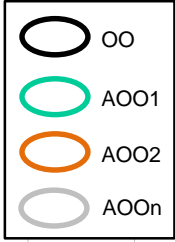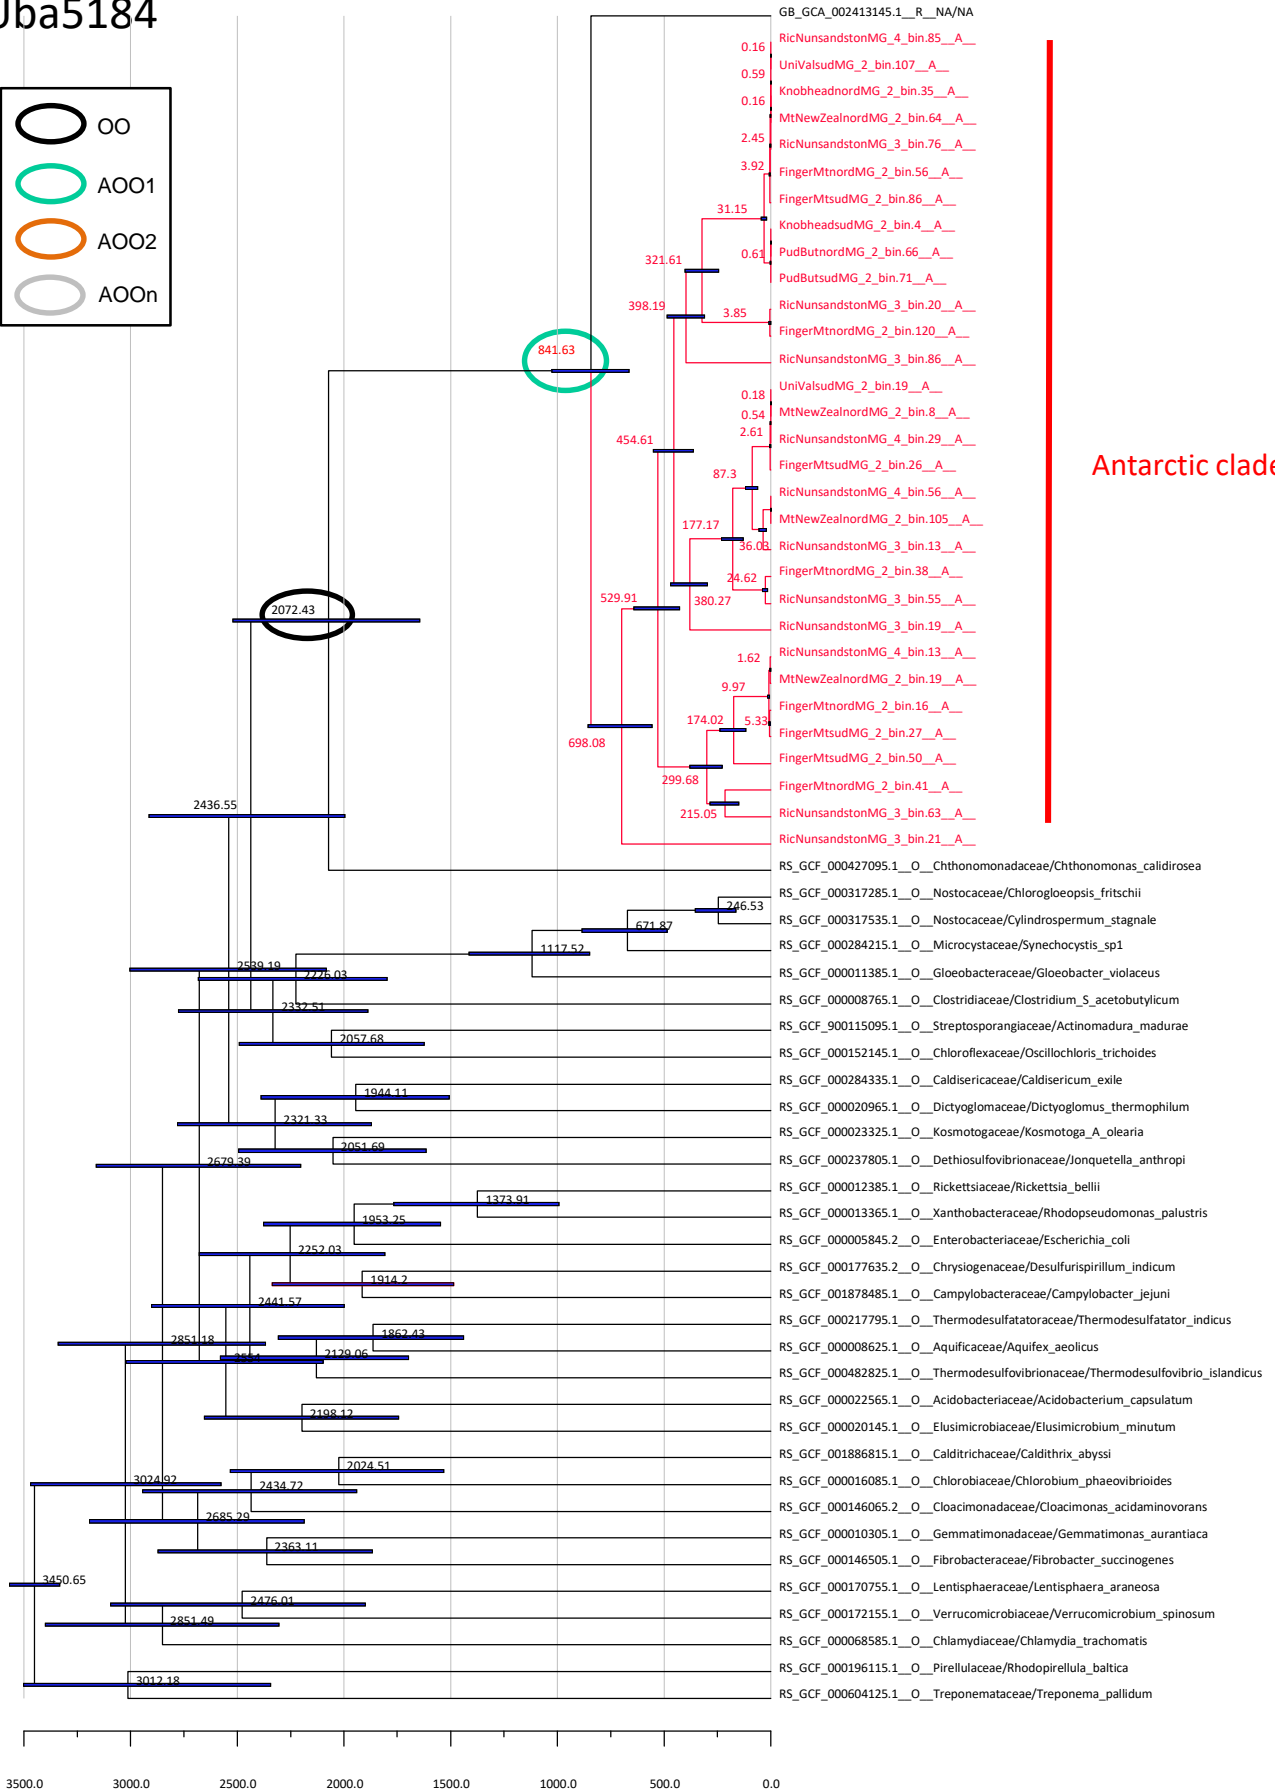

Supplement: 40168_2021_1021_MOESM3_ESM.pdf [file 40168_2021_1021_MOESM3_ESM.pdf]
