# Supplementary material for: Pre-Cambrian roots of novel Antarctic cryptoendolithic bacterial lineages
Source: Microbiome. 2021 Mar 19;9:63. doi: 10.1186/s40168-021-01021-0 (PMC7980648; doi:10.1186/s40168-021-01021-0)
Supplement: Supplementary file 3 — Additional file 2: Supplementary Table 1. Results of the CBS detection procedure and the validation using Mash Screen. Each row reports: CBS ID (i.e. the CBS MAG representative), metagenomic sample, estimated depth of coverage (mean, standard deviation, first quartile, median third quartile), number of mapped reads, ANI between the consensus sequences and the CBS representative, coverage breadths at depths from 1 to 5, Mash Screen containment score, number of shared hashes, median multiplicity and containment score p-value. Supplementary Table 2. Assembly statistics and taxonomic classification of the MAGs. Supplementary Table 3. Abundance of CBS at phylum level, expressed as percentage of reads that could be mapped to the representative CBS. Median: median; Q1 and Q3: first and third quartile; IQR: interquartile range; Mean: mean; SD: standard deviation; #CBS: number of candidate bacterial species belonging to the phylum. Supplementary Table 4. Increase in the number of bacterial species for each taxonomic Order provided by the data in the present study, compared to the data available in the GTDB database. Supplementary Table 5. Sample metadata. Geographic coordinates of the sampling sites, accession numbers of the raw sequences, accession numbers and N50 of the assembled metagenomes on the JGI IMG/M portal. Supplementary Table 6. Prevalence and taxonomic classification for each CBS representative. Supplementary Table 7. Summary of Bayesian divergence estimates. For each order we report the mean age of its origin (OO: the split of the order from the closest order) and the 95% CI (OO max and OO min), the origin of the oldest uniquely Antarctic clade (AOO1, the split of the Antarctic clade from a non-Antarctic lineage of the same order), and, where present, the origin of the second oldest antarctic clade (AOO2). See Supplementary Data 1. Supplementary Table 8. Number of predicted proteins (NProts) and of proteins that had a match in the EggNOG database (NHitsOG) and [file 40168_2021_1021_MOESM2_ESM.xlsx]

## Sheet: S1
CBS	Sample	CovDepthMean	CovDepthStd	CovDepthQ1	CovDepthMedian	CovDepthQ3	Mapped	ANI	CovBreadth1	CovBreadth2	CovBreadth3	CovBreadth4	CovBreadth5	Containment	SharedHashes	MultiplicityMedian	PValue
BatPronordMG_2_bin.40	BatPronordMG_2	15.65	5.654	12	15	19	553739	99.9996	1	1	0.999	0.998	0.996	1	10000/10000	13	0
BatPronordMG_2_bin.42	BatPronordMG_2	31.92	13.402	26	31	36	1093794	99.9987	1	1	1	1	0.999	1	10000/10000	26	0
ButProsudMG_2_bin.21	BatPronordMG_2	79.734	50.598	41	91	107	2770394	98.8148	0.975	0.962	0.951	0.941	0.932	0.996652	9320/10000	63	0
FingerMtnordMG_2_bin.101	BatPronordMG_2	0.395	1.787	0	0	0	11959	91.6645	0.084	0.064	0.05	0.04	0.032	0.854379	367/10000	13	0
FingerMtnordMG_2_bin.102	BatPronordMG_2	0.057	3.251	0	0	0	1264	0	0.006	0.005	0.003	0.003	0.002	0.836094	233/10000	6	0
FingerMtnordMG_2_bin.103	BatPronordMG_2	0.262	2.646	0	0	0	2516	91.3144	0.034	0.025	0.02	0.016	0.013	0.869385	529/10000	4	0
FingerMtnordMG_2_bin.104	BatPronordMG_2	0.105	1.486	0	0	0	2513	91.1533	0.029	0.018	0.012	0.008	0.005	0.86037	425/10000	3	0
FingerMtnordMG_2_bin.109	BatPronordMG_2	0	0	0	0	0	0	0	0	0	0	0	0	0.738102	17/10000	1	1.13602e-08
FingerMtnordMG_2_bin.118	BatPronordMG_2	0.073	0.868	0	0	0	1946	89.9126	0.019	0.012	0.008	0.006	0.005	0.819769	154/10000	12	1.87302e-203
FingerMtnordMG_2_bin.120	BatPronordMG_2	0.001	0.083	0	0	0	24	0	0	0	0	0	0	0.804587	104/10000	5	1.38028e-120
FingerMtnordMG_2_bin.121	BatPronordMG_2	1.231	14.781	0	0	0	71328	92.529	0.153	0.063	0.038	0.03	0.027	0.885987	787/10000	1	0
FingerMtnordMG_2_bin.125	BatPronordMG_2	0.586	6.904	0	0	0	14483	91.7544	0.093	0.056	0.036	0.024	0.018	0.877761	647/10000	3	0
FingerMtnordMG_2_bin.130	BatPronordMG_2	0.026	0.633	0	0	0	714	89.3538	0.005	0.003	0.002	0.002	0.001	0.803466	101/10000	11	6.5839e-116
FingerMtnordMG_2_bin.137	BatPronordMG_2	0.606	6.74	0	0	0	17402	91.7799	0.078	0.055	0.041	0.031	0.024	0.878909	665/10000	3	0
FingerMtnordMG_2_bin.15	BatPronordMG_2	0.919	9.077	0	0	0	26076	91.5268	0.053	0.044	0.039	0.035	0.031	0.86008	422/10000	14	0
FingerMtnordMG_2_bin.17	BatPronordMG_2	0.001	0.099	0	0	0	37	0	0	0	0	0	0	0.738102	17/10000	3	1.13602e-08
FingerMtnordMG_2_bin.18	BatPronordMG_2	0.003	0.174	0	0	0	156	0	0.001	0	0	0	0	0.759523	31/10000	7	1.13144e-21
FingerMtnordMG_2_bin.19	BatPronordMG_2	0.164	1.818	0	0	0	4019	91.118	0.031	0.022	0.017	0.013	0.011	0.831205	206/10000	7	2.59074e-297
FingerMtnordMG_2_bin.22	BatPronordMG_2	0.009	0.646	0	0	0	351	0	0.001	0.001	0	0	0	0.758338	30/10000	3	1.22963e-20
FingerMtnordMG_2_bin.24	BatPronordMG_2	0.012	0.564	0	0	0	491	0	0.001	0.001	0.001	0.001	0.001	0.764951	36/10000	5	4.72814e-27
FingerMtnordMG_2_bin.29	BatPronordMG_2	0.176	1.626	0	0	0	5031	91.5284	0.042	0.029	0.02	0.015	0.011	0.866723	496/10000	3	0
FingerMtnordMG_2_bin.3	BatPronordMG_2	0.001	0.068	0	0	0	31	0	0	0	0	0	0	0.762871	34/10000	6	7.31745e-25
FingerMtnordMG_2_bin.31	BatPronordMG_2	0.075	1.863	0	0	0	1749	0	0.007	0.005	0.004	0.003	0.003	0.833811	220/10000	4	0
FingerMtnordMG_2_bin.33	BatPronordMG_2	0.062	1.844	0	0	0	1832	90.2279	0.016	0.009	0.006	0.004	0.003	0.814066	133/10000	10	1.2795e-167
FingerMtnordMG_2_bin.35	BatPronordMG_2	0.001	0.128	0	0	0	54	0	0	0	0	0	0	0.740114	18/10000	1	1.79093e-09
FingerMtnordMG_2_bin.38	BatPronordMG_2	0.013	1.186	0	0	0	334	0	0.001	0.001	0.001	0	0	0.799903	92/10000	4	4.13006e-102
FingerMtnordMG_2_bin.41	BatPronordMG_2	0.002	0.138	0	0	0	38	0	0	0	0	0	0	0.816608	142/10000	5	8.2282e-183
FingerMtnordMG_2_bin.53	BatPronordMG_2	0.332	3.424	0	0	0	10351	91.1819	0.041	0.03	0.025	0.021	0.019	0.860562	427/10000	7	0
FingerMtnordMG_2_bin.57	BatPronordMG_2	0.97	12.979	0	0	0	29302	91.5204	0.061	0.046	0.04	0.035	0.032	0.859885	420/10000	10	0
FingerMtnordMG_2_bin.58	BatPronordMG_2	0.716	1.522	0	0	1	12050	94.6067	0.288	0.175	0.105	0.061	0.037	0.898962	1068/10000	3	0
FingerMtnordMG_2_bin.61	BatPronordMG_2	0.328	10.478	0	0	0	10002	91.0006	0.015	0.012	0.01	0.008	0.007	0.839062	251/10000	8	0
FingerMtnordMG_2_bin.63	BatPronordMG_2	0.045	2.43	0	0	0	2033	0	0.003	0.002	0.002	0.001	0.001	0.825882	180/10000	7	1.49233e-249
FingerMtnordMG_2_bin.65	BatPronordMG_2	0.004	0.245	0	0	0	216	0	0.001	0.001	0	0	0	0.820522	157/10000	4	1.11262e-208
FingerMtnordMG_2_bin.66	BatPronordMG_2	0.007	1.586	0	0	0	955	0	0.001	0	0	0	0	0.828218	191/10000	4	1.4358e-269
FingerMtnordMG_2_bin.70	BatPronordMG_2	0.283	2.561	0	0	0	9141	91.1891	0.028	0.023	0.019	0.017	0.016	0.847799	312/10000	11	0
FingerMtnordMG_2_bin.85	BatPronordMG_2	0.012	1.341	0	0	0	1001	0	0.001	0	0	0	0	0.820771	158/10000	5	1.98911e-210
FingerMtnordMG_2_bin.86	BatPronordMG_2	0.063	1.685	0	0	0	2779	0	0.004	0.003	0.003	0.003	0.002	0.800723	94/10000	4	3.81736e-105
FingerMtnordMG_2_bin.89	BatPronordMG_2	0.138	1.841	0	0	0	2907	0	0.01	0.009	0.008	0.007	0.007	0.824998	176/10000	5	2.39936e-242
FingerMtnordMG_2_bin.9	BatPronordMG_2	0.001	0.065	0	0	0	57	0	0.001	0	0	0	0	0.824323	173/10000	3	5.73481e-237
FingerMtnordMG_2_bin.94	BatPronordMG_2	0.264	1.648	0	0	0	6101	92.7058	0.079	0.056	0.039	0.026	0.017	0.886573	798/10000	3	0
FingerMtnordMG_2_bin.96	BatPronordMG_2	0.155	1.382	0	0	0	3072	91.8395	0.038	0.026	0.019	0.014	0.009	0.870543	544/10000	4	0
FingerMtnordMG_2_bin.98	BatPronordMG_2	0.11	1.884	0	0	0	1988	0	0.01	0.008	0.007	0.006	0.005	0.844294	286/10000	5	0
FingerMtnordMG_2_bin.99	BatPronordMG_2	0.036	2.173	0	0	0	1233	0	0.004	0.003	0.002	0.001	0.001	0.810726	122/10000	3	2.0418e-149
FingerMtsudMG_2_bin.2	BatPronordMG_2	12.691	17.902	0	6	23	654290	96.4436	0.603	0.574	0.553	0.537	0.522	0.941851	2842/10000	18	0
FingerMtsudMG_2_bin.24	BatPronordMG_2	0.45	7.741	0	0	0	10062	91.4304	0.043	0.032	0.024	0.02	0.017	0.876913	634/10000	4	0
FingerMtsudMG_2_bin.25	BatPronordMG_2	8.419	5.481	6	8	11	173431	99.9019	0.976	0.967	0.949	0.913	0.855	0.998536	9697/10000	7	0
FingerMtsudMG_2_bin.3	BatPronordMG_2	0.594	4.445	0	0	0	20012	93.5874	0.054	0.047	0.042	0.037	0.034	0.856435	386/10000	8	0
FingerMtsudMG_2_bin.49	BatPronordMG_2	46.098	38.411	37	45	52	1342234	99.81	0.978	0.977	0.975	0.975	0.974	0.997989	9586/10000	38	0
FingerMtsudMG_2_bin.5	BatPronordMG_2	0.042	2.328	0	0	0	883	0	0.004	0.003	0.002	0.002	0.001	0.796446	84/10000	11	3.6229e-90
FingerMtsudMG_2_bin.50	BatPronordMG_2	0.001	0.038	0	0	0	10	0	0	0	0	0	0	0.811665	125/10000	5	2.43823e-154
FingerMtsudMG_2_bin.66	BatPronordMG_2	0.06	0.673	0	0	0	1105	90.08	0.017	0.011	0.007	0.005	0.004	0.816333	141/10000	12	4.12984e-181
FingerMtsudMG_2_bin.74	BatPronordMG_2	0.311	3.712	0	0	0	7321	91.7709	0.043	0.029	0.022	0.018	0.015	0.858195	403/10000	3	0
FingerMtsudMG_2_bin.9	BatPronordMG_2	7.693	20.833	0	2	10	445519	96.6233	0.587	0.525	0.479	0.44	0.406	0.935688	2476/10000	9	0
KnobheadnordMG_2_bin.23	BatPronordMG_2	7.927	25.888	1	3	5	236027	98.3263	0.834	0.702	0.543	0.4	0.294	0.982282	6870/10000	3	0
KnobheadnordMG_2_bin.34	BatPronordMG_2	0.332	1.606	0	0	0	9065	91.7936	0.078	0.058	0.044	0.034	0.027	0.857065	392/10000	12	0
KnobheadnordMG_2_bin.72	BatPronordMG_2	1	6.997	0	0	0	23341	92.0306	0.066	0.056	0.051	0.046	0.042	0.869228	527/10000	8	0
KnobheadsudMG_2_bin.2	BatPronordMG_2	2.463	8.637	0	0	2	61943	95.6447	0.405	0.304	0.239	0.19	0.151	0.916841	1615/10000	5	0
KnobheadsudMG_2_bin.4	BatPronordMG_2	0.07	5.809	0	0	0	1451	0	0.002	0.001	0.001	0.001	0	0.829438	197/10000	4	1.31796e-280
KnobheadsudMG_2_bin.48	BatPronordMG_2	0.065	0.648	0	0	0	1828	90.3287	0.019	0.013	0.009	0.006	0.004	0.813479	131/10000	11	2.8011e-164
KnobheadsudMG_2_bin.80	BatPronordMG_2	8.747	18.875	0	5	12	384192	96.6459	0.707	0.653	0.609	0.571	0.534	0.957984	4060/10000	8	0
LinTernordMG_2_bin.2	BatPronordMG_2	2.432	7.753	0	2	3	75266	97.0812	0.682	0.501	0.326	0.195	0.111	0.963778	4608/10000	2	0
LinTernordMG_2_bin.21	BatPronordMG_2	3.652	25.65	0	0	0	211992	93.133	0.122	0.097	0.086	0.08	0.077	0.895332	981/10000	18	0
LinTernordMG_2_bin.22	BatPronordMG_2	1.604	11.143	0	0	1	48233	94.6357	0.315	0.126	0.059	0.038	0.031	0.93567	2475/10000	1	0
LinTernordMG_2_bin.4	BatPronordMG_2	0.219	2.653	0	0	0	6249	91.4991	0.03	0.021	0.016	0.013	0.011	0.853483	359/10000	5	0
LinTernordMG_2_bin.44	BatPronordMG_2	0.273	3.673	0	0	0	7338	90.9156	0.02	0.015	0.013	0.011	0.01	0.865967	487/10000	5	0
LinTernordMG_2_bin.8	BatPronordMG_2	2.378	11.097	0	0	1	75334	94.8752	0.28	0.209	0.163	0.13	0.105	0.904712	1221/10000	6	0
MtNewZealnordMG_2_bin.1	BatPronordMG_2	0.788	3.493	0	0	1	17147	94.3236	0.264	0.161	0.102	0.064	0.041	0.903132	1177/10000	3	0
MtNewZealnordMG_2_bin.10	BatPronordMG_2	0.181	2.226	0	0	0	6732	90.9488	0.042	0.022	0.014	0.01	0.007	0.860944	431/10000	3	0
MtNewZealnordMG_2_bin.105	BatPronordMG_2	0.009	1.183	0	0	0	220	0	0.001	0	0	0	0	0.794122	79/10000	4	7.19386e-83
MtNewZealnordMG_2_bin.16	BatPronordMG_2	0.349	3.112	0	0	0	9915	91.6323	0.075	0.055	0.042	0.033	0.026	0.85337	358/10000	13	0
MtNewZealnordMG_2_bin.19	BatPronordMG_2	0.038	5.097	0	0	0	896	0	0.001	0	0	0	0	0.800315	93/10000	6	1.26242e-103
MtNewZealnordMG_2_bin.25	BatPronordMG_2	1.333	20.997	0	0	0	44753	91.6251	0.054	0.045	0.039	0.035	0.033	0.857582	397/10000	13	0
MtNewZealnordMG_2_bin.27	BatPronordMG_2	0.964	8.22	0	0	0	36622	94.0959	0.088	0.068	0.055	0.046	0.039	0.890179	869/10000	4	0
MtNewZealnordMG_2_bin.7	BatPronordMG_2	16.632	14.617	3	17	27	487079	96.3516	0.804	0.779	0.754	0.731	0.71	0.946276	3136/10000	20	0
MtNewZealnordMG_2_bin.74	BatPronordMG_2	0.003	0.305	0	0	0	253	0	0.001	0	0	0	0	0.817152	144/10000	4	3.1974e-186
MtNewZealnordMG_2_bin.9	BatPronordMG_2	13.628	10.737	10	14	18	215241	99.2372	0.904	0.893	0.886	0.88	0.874	0.99107	8283/10000	13	0
PudButnordMG_2_bin.11	BatPronordMG_2	0.021	0.81	0	0	0	734	0	0.002	0.002	0.001	0.001	0.001	0.760672	32/10000	5	1.00864e-22
PudButnordMG_2_bin.13	BatPronordMG_2	0.009	1.207	0	0	0	294	0	0	0	0	0	0	0.761788	33/10000	3	8.72002e-24
PudButnordMG_2_bin.2	BatPronordMG_2	0.235	3.143	0	0	0	4719	91.1366	0.026	0.019	0.014	0.011	0.009	0.856435	386/10000	4	0
PudButnordMG_2_bin.22	BatPronordMG_2	4.652	8.746	0	0	8	249897	95.469	0.421	0.384	0.357	0.332	0.31	0.905377	1240/10000	16	0
PudButnordMG_2_bin.3	BatPronordMG_2	1.351	10.77	0	0	0	77425	92.756	0.09	0.071	0.062	0.057	0.053	0.878909	665/10000	9	0
PudButnordMG_2_bin.36	BatPronordMG_2	0.001	0.036	0	0	0	23	0	0	0	0	0	0	0.807773	113/10000	3	7.61777e-135
PudButnordMG_2_bin.42	BatPronordMG_2	0.021	0.386	0	0	0	755	0	0.005	0.004	0.003	0.002	0.002	0.782522	58/10000	3	7.75802e-54
PudButnordMG_2_bin.5	BatPronordMG_2	0.498	3.808	0	0	0	6945	91.659	0.096	0.059	0.039	0.027	0.02	0.887773	821/10000	3	0
PudButnordMG_2_bin.53	BatPronordMG_2	0.004	0.18	0	0	0	170	0	0.002	0	0	0	0	0.827383	187/10000	3	2.94537e-262
PudButnordMG_2_bin.56	BatPronordMG_2	0.002	0.094	0	0	0	104	0	0.001	0	0	0	0	0.818482	149/10000	3	8.42424e-195
PudButnordMG_2_bin.59	BatPronordMG_2	0	0.018	0	0	0	5	0	0	0	0	0	0	0.763925	35/10000	5	5.96533e-26
PudButnordMG_2_bin.60	BatPronordMG_2	0.016	0.331	0	0	0	635	0	0.003	0.003	0.002	0.002	0.001	0.759523	31/10000	3	1.13144e-21
PudButnordMG_2_bin.67	BatPronordMG_2	0.014	1.201	0	0	0	365	0	0.001	0	0	0	0	0.822229	164/10000	10	5.68402e-221
PudButnordMG_2_bin.81	BatPronordMG_2	0.688	12.312	0	0	0	17922	91.5717	0.031	0.024	0.02	0.018	0.016	0.854268	366/10000	5	0
PudButnordMG_2_bin.85	BatPronordMG_2	1.262	4.994	0	0	0	38804	93.9792	0.194	0.152	0.123	0.102	0.084	0.881476	707/10000	9	0
PudButnordMG_2_bin.88	BatPronordMG_2	0.627	1.962	0	0	0	15405	93.5808	0.162	0.119	0.09	0.068	0.05	0.86622	490/10000	6	0
PudButnordMG_2_bin.90	BatPronordMG_2	0.92	14.067	0	0	0	47815	91.9841	0.06	0.04	0.032	0.028	0.026	0.86037	425/10000	5	0
PudButnordMG_2_bin.95	BatPronordMG_2	0.006	0.934	0	0	0	676	0	0.002	0.001	0	0	0	0.820022	155/10000	4	3.41436e-205
PudButsudMG_2_bin.15	BatPronordMG_2	7.83	4.091	5	8	10	214850	99.8301	0.958	0.95	0.93	0.889	0.823	0.99728	9444/10000	7	0
PudButsudMG_2_bin.38	BatPronordMG_2	20.048	17.594	3	23	31	636678	96.0675	0.789	0.771	0.757	0.743	0.731	0.953758	3700/10000	25	0
PudButsudMG_2_bin.44	BatPronordMG_2	3.224	5.214	0	0	5	113796	96.1553	0.434	0.385	0.344	0.308	0.276	0.894939	972/10000	13	0
PudButsudMG_2_bin.46	BatPronordMG_2	0.02	0.591	0	0	0	536	0	0.003	0.002	0.002	0.001	0.001	0.803466	101/10000	9	6.5839e-116
PudButsudMG_2_bin.57	BatPronordMG_2	0.485	4.762	0	0	0	12320	91.0479	0.039	0.032	0.028	0.025	0.022	0.860562	427/10000	9	0
PudButsudMG_2_bin.59	BatPronordMG_2	14.195	18.609	7	12	17	858142	99.6013	0.958	0.944	0.929	0.909	0.881	0.99652	9294/10000	9	0
PudButsudMG_2_bin.62	BatPronordMG_2	2.199	3.793	0	2	3	78366	98.0741	0.744	0.534	0.34	0.197	0.108	0.977283	6172/10000	2	0
PudButsudMG_2_bin.78	BatPronordMG_2	1.017	10.141	0	0	0	25341	91.6876	0.06	0.042	0.032	0.027	0.023	0.872844	575/10000	4	0
RickerHillsnord_2_bin.11	BatPronordMG_2	5.593	3.571	3	5	8	155813	98.1286	0.903	0.866	0.807	0.719	0.609	0.981748	6792/10000	5	0
RickerHillsnord_2_bin.17	BatPronordMG_2	0.205	3.81	0	0	0	4388	91.2759	0.042	0.026	0.017	0.012	0.008	0.867872	510/10000	4	0
RickerHillsnord_2_bin.19	BatPronordMG_2	3.407	7.576	1	3	5	67378	97.2487	0.818	0.714	0.574	0.421	0.288	0.969065	5169/10000	3	0
RickerHillsnord_2_bin.23	BatPronordMG_2	0.638	9.142	0	0	0	20421	92.4907	0.033	0.026	0.021	0.018	0.015	0.855904	381/10000	4	0
RickerHillsnord_2_bin.25	BatPronordMG_2	0.138	2.378	0	0	0	4811	90.8968	0.045	0.022	0.012	0.008	0.006	0.849449	325/10000	2	0
RickerHillsnord_2_bin.26	BatPronordMG_2	0.76	4.139	0	0	0	17654	92.4564	0.105	0.081	0.066	0.055	0.046	0.887722	820/10000	6	0
RickerHillsnord_2_bin.29	BatPronordMG_2	0.684	6.25	0	0	0	10969	91.3815	0.047	0.037	0.031	0.027	0.024	0.870771	547/10000	5	0
RickerHillsnord_2_bin.30	BatPronordMG_2	18.96	11.384	14	19	24	425154	98.7186	0.931	0.921	0.912	0.904	0.895	0.99041	8168/10000	15	0
RickerHillsnord_2_bin.32	BatPronordMG_2	0.315	4.025	0	0	0	8751	90.7449	0.032	0.026	0.022	0.019	0.017	0.856011	382/10000	10	0
RickerHillsnord_2_bin.34	BatPronordMG_2	4.41	19.418	0	0	2	265558	95.4259	0.367	0.257	0.196	0.163	0.141	0.931433	2250/10000	3	0
RickerHillsnord_2_bin.36	BatPronordMG_2	1.074	10.842	0	0	0	42579	91.7461	0.07	0.052	0.041	0.034	0.029	0.879035	667/10000	3	0
RickerHillsnord_2_bin.37	BatPronordMG_2	0.509	4.589	0	0	0	12797	91.7284	0.055	0.04	0.032	0.027	0.023	0.875508	613/10000	5	0
RickerHillsnord_2_bin.48	BatPronordMG_2	21.849	21.232	4	16	37	556649	99.0422	0.969	0.93	0.873	0.81	0.75	0.996683	9326/10000	4	0
RickerHillsnord_2_bin.50	BatPronordMG_2	1.612	3.656	0	0	2	33432	96.1901	0.44	0.29	0.21	0.158	0.118	0.935308	2455/10000	2	0
RickerHillsnord_2_bin.54	BatPronordMG_2	0.949	13.831	0	0	0	33175	93.6312	0.233	0.076	0.034	0.023	0.019	0.927097	2040/10000	1	0
RickerHillsnord_2_bin.55	BatPronordMG_2	1.182	8.192	0	0	0	35555	92.3228	0.069	0.057	0.049	0.044	0.04	0.881357	705/10000	6	0
RickerHillsnord_2_bin.63	BatPronordMG_2	0.034	0.715	0	0	0	1369	0	0.006	0.004	0.004	0.003	0.003	0.779864	54/10000	3	1.19489e-48
RickerHillsnord_2_bin.8	BatPronordMG_2	0.678	1.888	0	0	0	16683	93.1709	0.186	0.134	0.1	0.076	0.057	0.883902	749/10000	5	0
RicNunsandstonMG_3_bin.1	BatPronordMG_2	1.039	9.693	0	0	0	16148	0	0.03	0.026	0.022	0.019	0.017	0.865542	482/10000	5	0
RicNunsandstonMG_3_bin.11	BatPronordMG_2	0.008	0.779	0	0	0	593	0	0.001	0	0	0	0	0.796446	84/10000	4	3.6229e-90
RicNunsandstonMG_3_bin.12	BatPronordMG_2	7.261	12.231	1	4	11	178658	98.4623	0.813	0.703	0.611	0.543	0.489	0.979967	6538/10000	2	0
RicNunsandstonMG_3_bin.13	BatPronordMG_2	0.002	0.06	0	0	0	16	0	0.001	0	0	0	0	0.807431	112/10000	4	3.03394e-133
RicNunsandstonMG_3_bin.19	BatPronordMG_2	0.007	0.314	0	0	0	181	0	0.001	0.001	0.001	0.001	0	0.804587	104/10000	9	1.38028e-120
RicNunsandstonMG_3_bin.21	BatPronordMG_2	0.023	2.636	0	0	0	555	0	0.001	0.001	0.001	0	0	0.827593	188/10000	4	4.41203e-264
RicNunsandstonMG_3_bin.25	BatPronordMG_2	0.378	3.331	0	0	0	11013	91.0703	0.043	0.033	0.028	0.024	0.021	0.853028	355/10000	9	0
RicNunsandstonMG_3_bin.26	BatPronordMG_2	0.144	2.426	0	0	0	1984	0	0.013	0.009	0.007	0.006	0.005	0.834527	224/10000	3	0
RicNunsandstonMG_3_bin.35	BatPronordMG_2	0	0.02	0	0	0	7	0	0	0	0	0	0	0.750323	24/10000	2	9.79342e-15
RicNunsandstonMG_3_bin.43	BatPronordMG_2	0.426	3.801	0	0	0	9042	91.1731	0.036	0.029	0.025	0.022	0.02	0.856751	389/10000	10	0
RicNunsandstonMG_3_bin.47	BatPronordMG_2	0.03	0.747	0	0	0	503	0	0.003	0.003	0.002	0.002	0.002	0.828424	192/10000	7	2.1051e-271
RicNunsandstonMG_3_bin.48	BatPronordMG_2	0.961	15.634	0	0	0	39314	91.6345	0.056	0.038	0.031	0.027	0.024	0.857272	394/10000	6	0
RicNunsandstonMG_3_bin.58	BatPronordMG_2	0.044	0.486	0	0	0	899	89.3776	0.015	0.01	0.006	0.004	0.003	0.816057	140/10000	12	2.05802e-179
RicNunsandstonMG_3_bin.62	BatPronordMG_2	0.038	0.804	0	0	0	930	0	0.006	0.004	0.003	0.003	0.002	0.803843	102/10000	5	1.83334e-117
RicNunsandstonMG_3_bin.63	BatPronordMG_2	0.001	0.066	0	0	0	21	0	0	0	0	0	0	0.802701	99/10000	6	8.24066e-113
RicNunsandstonMG_3_bin.67	BatPronordMG_2	0	0	0	0	0	0	0	0	0	0	0	0	0.73131	14/10000	1	2.04402e-06
RicNunsandstonMG_3_bin.7	BatPronordMG_2	0.053	7.821	0	0	0	1518	0	0	0	0	0	0	0.725961	12/10000	2	4.68922e-05
RicNunsandstonMG_3_bin.70	BatPronordMG_2	0.574	3.931	0	0	0	14862	93.1065	0.135	0.097	0.072	0.054	0.04	0.864151	466/10000	6	0
RicNunsandstonMG_3_bin.74	BatPronordMG_2	0.671	6.309	0	0	0	17775	91.5107	0.047	0.038	0.034	0.03	0.028	0.856856	390/10000	15	0
RicNunsandstonMG_3_bin.78	BatPronordMG_2	0.825	10.213	0	0	0	36310	91.5565	0.057	0.037	0.03	0.026	0.024	0.859098	412/10000	7	0
RicNunsandstonMG_3_bin.85	BatPronordMG_2	0.001	0.068	0	0	0	29	0	0	0	0	0	0	0.745567	21/10000	2	5.15354e-12
RicNunsandstonMG_3_bin.86	BatPronordMG_2	0.007	0.264	0	0	0	163	0	0.001	0.001	0.001	0.001	0	0.789561	70/10000	4	4.36785e-70
RicNunsandstonMG_3_bin.88	BatPronordMG_2	1.792	4.08	0	0	1	68095	95.0314	0.296	0.245	0.21	0.18	0.155	0.88305	734/10000	13	0
RicNunsandstonMG_3_bin.89	BatPronordMG_2	0.215	4.95	0	0	0	7222	91.1849	0.013	0.01	0.008	0.007	0.006	0.848441	317/10000	4	0
RicNunsandstonMG_3_bin.90	BatPronordMG_2	0.013	0.477	0	0	0	271	0	0.001	0.001	0.001	0.001	0.001	0.740114	18/10000	13	1.79093e-09
RicNunsandstonMG_3_bin.91	BatPronordMG_2	0.004	0.155	0	0	0	155	0	0.002	0.001	0	0	0	0.836094	233/10000	3	0
RicNunsandstonMG_3_bin.93	BatPronordMG_2	0.213	1.466	0	0	0	7754	91.8969	0.07	0.04	0.025	0.016	0.011	0.877567	644/10000	2	0
RicNunsandstonMG_3_bin.94	BatPronordMG_2	0.339	3.5	0	0	0	8615	90.879	0.036	0.03	0.025	0.022	0.019	0.858498	406/10000	9	0
RicNunsandstonMG_3_bin.95	BatPronordMG_2	0	0	0	0	0	0	0	0	0	0	0	0	0.712079	8/10000	1	0.00930684
RicNunsandstonMG_4_bin.33	BatPronordMG_2	1.036	1.663	0	1	2	36087	96.2794	0.512	0.27	0.123	0.053	0.023	0.94874	3312/10000	2	0
RicNunsandstonMG_4_bin.58	BatPronordMG_2	0.898	2.404	0	0	1	26775	96.0084	0.421	0.197	0.097	0.052	0.031	0.95073	3461/10000	1	0
RicNunsandstonMG_4_bin.63	BatPronordMG_2	0.036	2.396	0	0	0	723	0	0.003	0.002	0.002	0.001	0.001	0.805317	106/10000	10	9.99765e-124
RicNunsandstonMG_4_bin.75	BatPronordMG_2	0.053	0.621	0	0	0	909	89.6486	0.024	0.009	0.005	0.003	0.002	0.855797	380/10000	3	0
RicNunsandstonMG_4_bin.86	BatPronordMG_2	2.788	8.696	1	2	4	51782	97.8301	0.78	0.632	0.462	0.309	0.188	0.975014	5878/10000	3	0
RicNunsandstonMG_4_bin.87	BatPronordMG_2	0.916	14.614	0	0	0	24489	91.8515	0.053	0.043	0.038	0.034	0.031	0.861792	440/10000	10	0
RicNunsandstonMG_4_bin.94	BatPronordMG_2	14.635	14.391	2	16	21	770256	97.8002	0.781	0.761	0.749	0.74	0.732	0.977381	6185/10000	16	0
SiePeanordMG_2_bin.15	BatPronordMG_2	0.573	8.69	0	0	0	24062	91.2437	0.037	0.026	0.021	0.019	0.017	0.844991	291/10000	6	0
SiePeanordMG_2_bin.16	BatPronordMG_2	0.01	1.246	0	0	0	276	0	0	0	0	0	0	0.774725	47/10000	3	6.94185e-40
SiePeanordMG_2_bin.21	BatPronordMG_2	0.206	5.903	0	0	0	5027	91.2317	0.013	0.01	0.008	0.007	0.006	0.844012	284/10000	5	0
SiePeanordMG_2_bin.24	BatPronordMG_2	0.002	0.083	0	0	0	51	0	0.001	0	0	0	0	0.789561	70/10000	10	4.36785e-70
SiePeanordMG_2_bin.38	BatPronordMG_2	0.001	0.074	0	0	0	31	0	0	0	0	0	0	0.772295	44/10000	10	2.90795e-36
SiePeanordMG_2_bin.41	BatPronordMG_2	2.095	13.775	0	0	0	64386	92.7068	0.117	0.096	0.083	0.075	0.068	0.899202	1074/10000	6	0
SiePeanordMG_2_bin.44	BatPronordMG_2	1.563	11.669	0	0	0	39899	92.0485	0.057	0.047	0.041	0.037	0.035	0.880394	689/10000	13	0
SiePeanordMG_2_bin.53	BatPronordMG_2	0.271	3.062	0	0	0	7301	90.3072	0.039	0.022	0.016	0.013	0.012	0.864415	469/10000	5	0
SiePeanordMG_2_bin.56	BatPronordMG_2	0.343	2.724	0	0	0	9070	91.9197	0.07	0.047	0.033	0.024	0.018	0.867791	509/10000	6	0
SiePeanordMG_2_bin.60	BatPronordMG_2	7.661	12.203	2	4	9	220543	98.49	0.865	0.788	0.689	0.584	0.489	0.985356	7336/10000	3	0
SiePeanordMG_2_bin.70	BatPronordMG_2	1.081	7.715	0	0	0	30028	94.3183	0.093	0.07	0.055	0.046	0.04	0.889042	846/10000	3	0
SiePeanordMG_2_bin.71	BatPronordMG_2	0	0	0	0	0	0	0	0	0	0	0	0	0.786199	64/10000	6	7.70889e-62
SiePeanordMG_2_bin.9	BatPronordMG_2	0.496	6.252	0	0	0	16786	91.1002	0.059	0.032	0.024	0.021	0.019	0.864939	475/10000	4	0
SiePeasudMG_2_bin.1	BatPronordMG_2	0.159	2.073	0	0	0	3845	90.8547	0.021	0.015	0.011	0.009	0.008	0.858999	411/10000	4	0
SiePeasudMG_2_bin.102	BatPronordMG_2	0.148	5.816	0	0	0	3517	0	0.007	0.006	0.005	0.004	0.004	0.832342	212/10000	7	0
SiePeasudMG_2_bin.103	BatPronordMG_2	0.032	0.485	0	0	0	627	90.0293	0.011	0.006	0.004	0.002	0.002	0.843009	277/10000	3	0
SiePeasudMG_2_bin.105	BatPronordMG_2	0.059	1.724	0	0	0	2163	0	0.003	0.003	0.002	0.002	0.002	0.812883	129/10000	6	5.94612e-161
SiePeasudMG_2_bin.106	BatPronordMG_2	0.192	2.823	0	0	0	4948	90.8185	0.017	0.012	0.01	0.009	0.008	0.841684	268/10000	6	0
SiePeasudMG_2_bin.11	BatPronordMG_2	0.084	1.381	0	0	0	1046	90.3504	0.013	0.009	0.007	0.006	0.005	0.857065	392/10000	5	0
SiePeasudMG_2_bin.112	BatPronordMG_2	0.003	0.385	0	0	0	86	0	0	0	0	0	0	0.786779	65/10000	5	3.37969e-63
SiePeasudMG_2_bin.114	BatPronordMG_2	0.001	0.122	0	0	0	35	0	0	0	0	0	0	0.764951	36/10000	2	4.72814e-27
SiePeasudMG_2_bin.118	BatPronordMG_2	0.23	2.445	0	0	0	6082	91.4691	0.03	0.024	0.019	0.017	0.014	0.858799	409/10000	4	0
SiePeasudMG_2_bin.12	BatPronordMG_2	0.003	0.389	0	0	0	85	0	0	0	0	0	0	0.777744	51/10000	5	7.66478e-45
SiePeasudMG_2_bin.121	BatPronordMG_2	0.001	0.042	0	0	0	25	0	0	0	0	0	0	0.755851	28/10000	1	1.31531e-18
SiePeasudMG_2_bin.16	BatPronordMG_2	0.039	1.477	0	0	0	823	0	0.004	0.003	0.002	0.002	0.001	0.824774	175/10000	5	1.49771e-240
SiePeasudMG_2_bin.2	BatPronordMG_2	0.507	7.509	0	0	0	10347	91.1965	0.035	0.025	0.02	0.018	0.016	0.867791	509/10000	5	0
SiePeasudMG_2_bin.22	BatPronordMG_2	0.011	0.234	0	0	0	466	0	0.003	0.002	0.002	0.001	0.001	0.769703	41/10000	3	9.94671e-33
SiePeasudMG_2_bin.25	BatPronordMG_2	0.022	0.982	0	0	0	423	0	0.002	0.001	0.001	0.001	0.001	0.777011	50/10000	7	1.37042e-43
SiePeasudMG_2_bin.29	BatPronordMG_2	0	0	0	0	0	0	0	0	0	0	0	0	0.754543	27/10000	1	1.29168e-17
SiePeasudMG_2_bin.3	BatPronordMG_2	0.117	1.612	0	0	0	2625	91.0748	0.015	0.011	0.009	0.007	0.006	0.852336	349/10000	4	0
SiePeasudMG_2_bin.31	BatPronordMG_2	0.314	2.346	0	0	0	6352	91.3471	0.055	0.039	0.03	0.024	0.02	0.871374	555/10000	5	0
SiePeasudMG_2_bin.35	BatPronordMG_2	0.1	1.28	0	0	0	2764	89.9884	0.014	0.011	0.009	0.007	0.006	0.858093	402/10000	6	0
SiePeasudMG_2_bin.36	BatPronordMG_2	0.002	0.106	0	0	0	92	0	0.001	0.001	0	0	0	0.759523	31/10000	2	1.13144e-21
SiePeasudMG_2_bin.38	BatPronordMG_2	0.214	2.645	0	0	0	4457	90.6239	0.024	0.018	0.014	0.012	0.01	0.852219	348/10000	6	0
SiePeasudMG_2_bin.40	BatPronordMG_2	1.061	7.513	0	0	0	58827	92.4455	0.112	0.091	0.077	0.068	0.06	0.86771	508/10000	14	0
SiePeasudMG_2_bin.41	BatPronordMG_2	0	0.009	0	0	0	2	0	0	0	0	0	0	0.787352	66/10000	5	1.45914e-64
SiePeasudMG_2_bin.44	BatPronordMG_2	0.058	1.596	0	0	0	1411	0	0.005	0.004	0.003	0.002	0.002	0.835578	230/10000	5	0
SiePeasudMG_2_bin.47	BatPronordMG_2	0.004	0.194	0	0	0	121	0	0.001	0.001	0	0	0	0.804587	104/10000	8	1.38028e-120
SiePeasudMG_2_bin.50	BatPronordMG_2	0.168	6.469	0	0	0	5850	89.9035	0.012	0.009	0.007	0.006	0.005	0.830819	204/10000	14	1.38443e-293
SiePeasudMG_2_bin.51	BatPronordMG_2	0.166	2.367	0	0	0	4794	91.2015	0.02	0.015	0.012	0.01	0.009	0.857787	399/10000	4	0
SiePeasudMG_2_bin.52	BatPronordMG_2	0.019	0.524	0	0	0	522	0	0.003	0.003	0.002	0.001	0.001	0.822939	167/10000	5	2.79385e-226
SiePeasudMG_2_bin.55	BatPronordMG_2	0.048	6.371	0	0	0	1123	0	0	0	0	0	0	0.735975	16/10000	2	6.81322e-08
SiePeasudMG_2_bin.56	BatPronordMG_2	0.027	1.095	0	0	0	857	0	0.002	0.001	0.001	0.001	0.001	0.80944	118/10000	5	6.66133e-143
SiePeasudMG_2_bin.58	BatPronordMG_2	0.021	0.405	0	0	0	366	0	0.007	0.003	0.002	0.002	0.001	0.847799	312/10000	4	0
SiePeasudMG_2_bin.59	BatPronordMG_2	0.148	5.179	0	0	0	2978	90.364	0.018	0.012	0.008	0.006	0.005	0.854157	365/10000	4	0
SiePeasudMG_2_bin.62	BatPronordMG_2	0.468	2.403	0	0	0	19952	91.7635	0.073	0.058	0.047	0.04	0.034	0.845677	296/10000	14	0
SiePeasudMG_2_bin.63	BatPronordMG_2	0.132	2.357	0	0	0	2356	90.6152	0.015	0.01	0.008	0.006	0.005	0.843585	281/10000	3	0
SiePeasudMG_2_bin.64	BatPronordMG_2	0.617	9.086	0	0	0	14009	91.4643	0.037	0.028	0.023	0.02	0.017	0.865882	486/10000	5	0
SiePeasudMG_2_bin.65	BatPronordMG_2	0.139	5.277	0	0	0	2959	90.4709	0.013	0.008	0.006	0.005	0.004	0.843728	282/10000	4	0
SiePeasudMG_2_bin.67	BatPronordMG_2	0.012	1.542	0	0	0	870	0	0.002	0.001	0.001	0	0	0.821989	163/10000	3	3.30213e-219
SiePeasudMG_2_bin.68	BatPronordMG_2	0.569	3.654	0	0	0	14437	92.2173	0.074	0.057	0.047	0.039	0.034	0.886361	794/10000	5	0
SiePeasudMG_2_bin.69	BatPronordMG_2	0.016	2.082	0	0	0	988	0	0.001	0	0	0	0	0.817689	146/10000	4	1.20808e-189
SiePeasudMG_2_bin.7	BatPronordMG_2	0.02	0.684	0	0	0	311	0	0.001	0.001	0.001	0.001	0.001	0.823867	171/10000	6	2.14499e-233
SiePeasudMG_2_bin.71	BatPronordMG_2	0.145	5.017	0	0	0	3748	0	0.007	0.005	0.004	0.003	0.003	0.848822	320/10000	4	0
SiePeasudMG_2_bin.73	BatPronordMG_2	5.554	8.496	0	0	10	275262	95.9799	0.493	0.457	0.428	0.403	0.379	0.909273	1357/10000	16	0
SiePeasudMG_2_bin.74	BatPronordMG_2	0	0	0	0	0	0	0	0	0	0	0	0	0.767872	39/10000	1	2.0034e-30
SiePeasudMG_2_bin.76	BatPronordMG_2	0	0.009	0	0	0	2	0	0	0	0	0	0	0.777011	50/10000	4	1.37042e-43
SiePeasudMG_2_bin.77	BatPronordMG_2	0.052	1.09	0	0	0	430	0	0.007	0.005	0.004	0.003	0.003	0.845813	297/10000	4	0
SiePeasudMG_2_bin.79	BatPronordMG_2	0	0	0	0	0	0	0	0	0	0	0	0	0.728733	13/10000	1	1.01467e-05
SiePeasudMG_2_bin.8	BatPronordMG_2	0.052	0.719	0	0	0	888	0	0.01	0.008	0.006	0.005	0.004	0.835751	231/10000	4	0
SiePeasudMG_2_bin.82	BatPronordMG_2	0.007	0.373	0	0	0	245	0	0.001	0.001	0.001	0	0	0.820022	155/10000	5	3.41436e-205
SiePeasudMG_2_bin.83	BatPronordMG_2	0	0	0	0	0	0	0	0	0	0	0	0	0.787916	67/10000	6	6.20512e-66
SiePeasudMG_2_bin.84	BatPronordMG_2	0.002	0.082	0	0	0	84	0	0.001	0	0	0	0	0.774725	47/10000	2	6.94185e-40
SiePeasudMG_2_bin.85	BatPronordMG_2	0.24	2.833	0	0	0	4141	90.6999	0.031	0.021	0.016	0.013	0.011	0.867547	506/10000	4	0
SiePeasudMG_2_bin.86	BatPronordMG_2	0.511	5.221	0	0	0	13058	91.5232	0.052	0.039	0.031	0.026	0.022	0.874196	594/10000	6	0
SiePeasudMG_2_bin.87	BatPronordMG_2	0.076	2.012	0	0	0	1314	0	0.007	0.005	0.004	0.004	0.003	0.842131	271/10000	6	0
SiePeasudMG_2_bin.89	BatPronordMG_2	0.065	1.439	0	0	0	749	0	0.008	0.006	0.004	0.004	0.003	0.837604	242/10000	6	0
SiePeasudMG_2_bin.92	BatPronordMG_2	0.003	0.454	0	0	0	114	0	0	0	0	0	0	0.82696	185/10000	4	1.29137e-258
SiePeasudMG_2_bin.93	BatPronordMG_2	0.02	0.87	0	0	0	582	0	0.003	0.002	0.001	0.001	0.001	0.808448	115/10000	6	4.67624e-138
SiePeasudMG_2_bin.95	BatPronordMG_2	0.087	1.384	0	0	0	957	0	0.011	0.008	0.006	0.005	0.005	0.830035	200/10000	5	3.72281e-286
TrioNunataknord_2_bin.100	BatPronordMG_2	0.126	7.249	0	0	0	780	0	0.002	0.001	0.001	0.001	0.001	0.801526	96/10000	8	3.38082e-108
TrioNunataknord_2_bin.101	BatPronordMG_2	0.081	4.478	0	0	0	1909	90.6848	0.012	0.007	0.005	0.003	0.003	0.844153	285/10000	3	0
TrioNunataknord_2_bin.117	BatPronordMG_2	0.012	1.624	0	0	0	342	0	0	0	0	0	0	0.766923	38/10000	3	2.73812e-29
TrioNunataknord_2_bin.126	BatPronordMG_2	0.174	2.55	0	0	0	4141	90.1867	0.017	0.012	0.01	0.009	0.008	0.840316	259/10000	6	0
TrioNunataknord_2_bin.24	BatPronordMG_2	0.041	3.177	0	0	0	1040	0	0.001	0.001	0.001	0.001	0.001	0.794122	79/10000	5	7.19386e-83
TrioNunataknord_2_bin.27	BatPronordMG_2	0.026	0.396	0	0	0	292	0	0.01	0.005	0.003	0.002	0.001	0.854046	364/10000	5	0
TrioNunataknord_2_bin.28	BatPronordMG_2	0.034	1.198	0	0	0	1146	0	0.002	0.002	0.002	0.002	0.002	0.773122	45/10000	10	1.84378e-37
TrioNunataknord_2_bin.29	BatPronordMG_2	3.127	19.642	0	0	0	83455	92.9619	0.155	0.121	0.101	0.088	0.079	0.889341	852/10000	4	0
TrioNunataknord_2_bin.33	BatPronordMG_2	0.213	8.791	0	0	0	2958	0	0.005	0.004	0.004	0.003	0.003	0.821506	161/10000	7	1.09384e-215
TrioNunataknord_2_bin.44	BatPronordMG_2	0.083	2.282	0	0	0	2705	90.3043	0.032	0.012	0.006	0.003	0.002	0.848441	317/10000	2	0
TrioNunataknord_2_bin.46	BatPronordMG_2	0.15	7.777	0	0	0	2988	90.2887	0.012	0.006	0.004	0.003	0.003	0.843442	280/10000	4	0
TrioNunataknord_2_bin.58	BatPronordMG_2	0.074	0.861	0	0	0	1436	90.8583	0.023	0.013	0.008	0.005	0.004	0.871448	556/10000	5	0
TrioNunataknord_2_bin.6	BatPronordMG_2	0.404	4.478	0	0	0	11482	91.0655	0.031	0.023	0.018	0.015	0.013	0.871374	555/10000	4	0
TrioNunataknord_2_bin.63	BatPronordMG_2	0.199	3.128	0	0	0	6414	91.1985	0.02	0.014	0.011	0.009	0.008	0.840624	261/10000	5	0
TrioNunataknord_2_bin.66	BatPronordMG_2	0.011	0.283	0	0	0	225	0	0.003	0.002	0.001	0.001	0.001	0.840777	262/10000	5	0
TrioNunataknord_2_bin.69	BatPronordMG_2	0.019	0.384	0	0	0	856	0	0.004	0.003	0.003	0.002	0.002	0.770586	42/10000	2	6.75771e-34
TrioNunataknord_2_bin.79	BatPronordMG_2	0.529	5.833	0	0	0	7119	0	0.034	0.028	0.024	0.02	0.018	0.869385	529/10000	5	0
TrioNunataknord_2_bin.83	BatPronordMG_2	0.113	7.153	0	0	0	2738	0	0.004	0.003	0.002	0.002	0.002	0.830429	202/10000	5	7.25185e-290
TrioNunataknord_2_bin.9	BatPronordMG_2	0.064	0.67	0	0	0	919	90.5249	0.023	0.013	0.008	0.005	0.003	0.854601	369/10000	3	0
TrioNunataknord_2_bin.90	BatPronordMG_2	0.035	0.493	0	0	0	1164	0	0.007	0.006	0.005	0.004	0.003	0.785609	63/10000	3	1.73117e-60
TrioNunataknord_2_bin.94	BatPronordMG_2	0.157	2.364	0	0	0	2725	0	0.017	0.013	0.01	0.008	0.007	0.847929	313/10000	4	0
TrioNunataknord_2_bin.95	BatPronordMG_2	0.001	0.084	0	0	0	23	0	0	0	0	0	0	0.794597	80/10000	4	2.55928e-84
UniValnordMG_2_bin.12	BatPronordMG_2	10.943	21.768	1	9	15	392723	97.1916	0.791	0.75	0.716	0.685	0.654	0.970333	5313/10000	9	0
UniValnordMG_2_bin.14	BatPronordMG_2	0.579	1.596	0	0	1	16912	94.6294	0.301	0.13	0.053	0.022	0.011	0.899639	1085/10000	2	0
UniValnordMG_2_bin.23	BatPronordMG_2	21.047	28.922	2	14	37	601495	96.6545	0.826	0.781	0.735	0.693	0.656	0.96448	4679/10000	5	0
UniValnordMG_2_bin.36	BatPronordMG_2	3.833	11.04	1	2	4	92710	98.8862	0.839	0.651	0.447	0.278	0.165	0.987023	7601/10000	2	0
UniValnordMG_2_bin.45	BatPronordMG_2	7.59	7.18	5	7	9	153459	99.5499	0.98	0.962	0.927	0.87	0.785	0.997445	9477/10000	6	0
UniValnordMG_2_bin.58	BatPronordMG_2	30.792	21.331	21	34	41	1156922	98.7923	0.9	0.885	0.876	0.871	0.866	0.990138	8121/10000	25	0
UniValnordMG_2_bin.66	BatPronordMG_2	0.468	3.401	0	0	0	11673	91.2477	0.048	0.039	0.034	0.03	0.027	0.863078	454/10000	9	0
UniValsudMG_2_bin.107	BatPronordMG_2	0.069	5.735	0	0	0	1470	0	0.003	0.001	0.001	0.001	0.001	0.831966	210/10000	5	8.55151e-305
UniValsudMG_2_bin.109	BatPronordMG_2	0.012	0.88	0	0	0	85	0	0	0	0	0	0	0.783159	59/10000	6	3.74881e-55
UniValsudMG_2_bin.113	BatPronordMG_2	0.093	3.963	0	0	0	1719	0	0.008	0.005	0.004	0.003	0.002	0.845129	292/10000	4	0
UniValsudMG_2_bin.125	BatPronordMG_2	0.115	2.798	0	0	0	3829	89.8682	0.016	0.007	0.006	0.005	0.004	0.837933	244/10000	4	0
UniValsudMG_2_bin.127	BatPronordMG_2	0	0.017	0	0	0	7	0	0	0	0	0	0	0.765949	37/10000	1	3.64635e-28
UniValsudMG_2_bin.16	BatPronordMG_2	0.058	2.928	0	0	0	1774	0	0.002	0.001	0.001	0.001	0.001	0.808112	114/10000	7	1.89574e-136
UniValsudMG_2_bin.19	BatPronordMG_2	0.001	0.037	0	0	0	23	0	0.001	0	0	0	0	0.803843	102/10000	4	1.83334e-117
UniValsudMG_2_bin.26	BatPronordMG_2	5.599	3.972	3	5	8	170549	98.9154	0.9	0.862	0.802	0.713	0.601	0.989277	7974/10000	5	0
UniValsudMG_2_bin.27	BatPronordMG_2	1.436	9.411	0	0	0	52796	94.1867	0.104	0.082	0.065	0.054	0.047	0.891713	901/10000	4	0
UniValsudMG_2_bin.44	BatPronordMG_2	0.805	6.55	0	0	0	17395	93.2823	0.07	0.054	0.042	0.035	0.03	0.879534	675/10000	4	0
UniValsudMG_2_bin.59	BatPronordMG_2	0.471	7.571	0	0	0	9384	90.8619	0.029	0.021	0.017	0.015	0.013	0.862988	453/10000	5	0
UniValsudMG_2_bin.68	BatPronordMG_2	0.154	6.429	0	0	0	3640	0	0.008	0.006	0.005	0.005	0.004	0.851037	338/10000	4	0
UniValsudMG_2_bin.71	BatPronordMG_2	0.12	1.896	0	0	0	2518	91.8252	0.024	0.017	0.011	0.008	0.006	0.852798	353/10000	3	0
UniValsudMG_2_bin.79	BatPronordMG_2	0.082	4.869	0	0	0	1839	0	0.003	0.002	0.002	0.001	0.001	0.832342	212/10000	4	0
BatPronordMG_2_bin.40	ButProsudMG_2	0.022	2.262	0	0	0	774	0	0.001	0	0	0	0	0.796895	85/10000	2	1.08132e-89
BatPronordMG_2_bin.42	ButProsudMG_2	0.074	2.305	0	0	0	2520	89.4566	0.018	0.005	0.003	0.002	0.002	0.824998	176/10000	1	3.1044e-238
ButProsudMG_2_bin.21	ButProsudMG_2	171.989	68.014	149	165	182	5961057	99.995	1	1	1	1	1	1	10000/10000	138	0
FingerMtnordMG_2_bin.101	ButProsudMG_2	0.001	0.105	0	0	0	45	0	0.001	0	0	0	0	0.796446	84/10000	3	3.05897e-88
FingerMtnordMG_2_bin.102	ButProsudMG_2	0.047	3.629	0	0	0	1031	0	0.005	0.004	0.003	0.002	0.002	0.814645	135/10000	4	7.78864e-168
FingerMtnordMG_2_bin.103	ButProsudMG_2	0.78	7.207	0	0	0	7478	91.4448	0.042	0.034	0.03	0.027	0.025	0.856856	390/10000	14	0
FingerMtnordMG_2_bin.104	ButProsudMG_2	0.072	5.619	0	0	0	1712	0	0.004	0.002	0.001	0.001	0.001	0.808448	115/10000	4	2.15133e-135
FingerMtnordMG_2_bin.109	ButProsudMG_2	0.002	0.055	0	0	0	56	0	0.002	0	0	0	0	0.761788	33/10000	1	4.53656e-23
FingerMtnordMG_2_bin.118	ButProsudMG_2	0.008	0.635	0	0	0	235	0	0	0	0	0	0	0.777744	51/10000	3	1.06549e-43
FingerMtnordMG_2_bin.120	ButProsudMG_2	0.003	0.134	0	0	0	50	0	0.001	0	0	0	0	0.791653	74/10000	2	5.08502e-74
FingerMtnordMG_2_bin.121	ButProsudMG_2	0.187	2.163	0	0	0	10811	90.8835	0.036	0.022	0.016	0.013	0.01	0.843728	282/10000	3	0
FingerMtnordMG_2_bin.125	ButProsudMG_2	2.482	16.983	0	0	0	61226	92.995	0.156	0.134	0.119	0.108	0.098	0.873347	582/10000	19	0
FingerMtnordMG_2_bin.130	ButProsudMG_2	0	0.019	0	0	0	6	0	0	0	0	0	0	0.77145	43/10000	3	4.02667e-34
FingerMtnordMG_2_bin.137	ButProsudMG_2	1.458	16.973	0	0	0	41781	92.7046	0.152	0.08	0.05	0.037	0.031	0.881297	704/10000	2	0
FingerMtnordMG_2_bin.15	ButProsudMG_2	0.622	5.696	0	0	1	17632	94.3968	0.295	0.132	0.058	0.029	0.016	0.905551	1245/10000	2	0
FingerMtnordMG_2_bin.17	ButProsudMG_2	0.001	0.045	0	0	0	59	0	0.001	0	0	0	0	0.753188	26/10000	1	4.34628e-16
FingerMtnordMG_2_bin.18	ButProsudMG_2	0.001	0.146	0	0	0	76	0	0	0	0	0	0	0.73131	14/10000	3	3.79007e-06
FingerMtnordMG_2_bin.19	ButProsudMG_2	0.004	0.168	0	0	0	115	0	0.002	0.001	0	0	0	0.786199	64/10000	2	2.18077e-60
FingerMtnordMG_2_bin.22	ButProsudMG_2	0.002	0.177	0	0	0	63	0	0	0	0	0	0	0.742022	19/10000	2	6.50224e-10
FingerMtnordMG_2_bin.24	ButProsudMG_2	0.001	0.052	0	0	0	29	0	0	0	0	0	0	0.74722	22/10000	3	1.90527e-12
FingerMtnordMG_2_bin.29	ButProsudMG_2	0.065	3.554	0	0	0	1865	89.7739	0.007	0.004	0.002	0.002	0.002	0.819769	154/10000	2	7.27426e-200
FingerMtnordMG_2_bin.3	ButProsudMG_2	0	0.023	0	0	0	13	0	0	0	0	0	0	0.763925	35/10000	1	3.4612e-25
FingerMtnordMG_2_bin.31	ButProsudMG_2	0.111	3.179	0	0	0	2625	0	0.004	0.004	0.003	0.003	0.003	0.807773	113/10000	2	3.14146e-132
FingerMtnordMG_2_bin.33	ButProsudMG_2	0.01	1.564	0	0	0	299	0	0	0	0	0	0	0.774725	47/10000	2	7.75561e-39
FingerMtnordMG_2_bin.35	ButProsudMG_2	0.001	0.295	0	0	0	127	0	0	0	0	0	0	0.748804	23/10000	1	2.49021e-13
FingerMtnordMG_2_bin.38	ButProsudMG_2	0.013	1.374	0	0	0	320	0	0.001	0.001	0	0	0	0.776264	49/10000	2	2.99347e-41
FingerMtnordMG_2_bin.41	ButProsudMG_2	0.002	0.17	0	0	0	40	0	0	0	0	0	0	0.796446	84/10000	3	3.05897e-88
FingerMtnordMG_2_bin.53	ButProsudMG_2	0.061	0.69	0	0	0	1905	90.8357	0.023	0.012	0.008	0.005	0.003	0.845677	296/10000	3	0
FingerMtnordMG_2_bin.57	ButProsudMG_2	0.158	1.899	0	0	0	4762	91.2798	0.036	0.023	0.016	0.012	0.009	0.845677	296/10000	5	0
FingerMtnordMG_2_bin.58	ButProsudMG_2	0.04	0.726	0	0	0	673	89.3046	0.019	0.005	0.002	0.001	0.001	0.834704	225/10000	2	0
FingerMtnordMG_2_bin.61	ButProsudMG_2	0.392	16.791	0	0	0	13036	0	0.006	0.006	0.005	0.004	0.004	0.819515	153/10000	5	3.7533e-198
FingerMtnordMG_2_bin.63	ButProsudMG_2	0.048	2.743	0	0	0	2174	0	0.001	0.001	0.001	0.001	0.001	0.806388	109/10000	3	6.01565e-126
FingerMtnordMG_2_bin.65	ButProsudMG_2	0.004	0.459	0	0	0	299	0	0	0	0	0	0	0.792159	75/10000	3	2.03899e-75
FingerMtnordMG_2_bin.66	ButProsudMG_2	0.01	2.672	0	0	0	1515	0	0	0	0	0	0	0.808112	114/10000	3	8.25727e-134
FingerMtnordMG_2_bin.70	ButProsudMG_2	0.053	0.548	0	0	0	1696	90.8991	0.017	0.01	0.007	0.005	0.003	0.836434	235/10000	3	0
FingerMtnordMG_2_bin.85	ButProsudMG_2	0.011	1.736	0	0	0	1213	0	0.001	0	0	0	0	0.806388	109/10000	2	6.01565e-126
FingerMtnordMG_2_bin.86	ButProsudMG_2	0.054	2.663	0	0	0	2393	0	0.003	0.002	0.002	0.001	0.001	0.775502	48/10000	2	4.86836e-40
FingerMtnordMG_2_bin.89	ButProsudMG_2	0.022	1.197	0	0	0	465	0	0.002	0.001	0.001	0.001	0.001	0.798212	88/10000	3	4.4526e-94
FingerMtnordMG_2_bin.9	ButProsudMG_2	0.001	0.121	0	0	0	65	0	0	0	0	0	0	0.804587	104/10000	2	3.47933e-118
FingerMtnordMG_2_bin.94	ButProsudMG_2	0.058	1.954	0	0	0	1344	0	0.007	0.004	0.003	0.002	0.002	0.825882	180/10000	3	2.40311e-245
FingerMtnordMG_2_bin.96	ButProsudMG_2	0.048	1.504	0	0	0	1058	0	0.006	0.004	0.003	0.003	0.002	0.821748	162/10000	4	1.1469e-213
FingerMtnordMG_2_bin.98	ButProsudMG_2	0.026	0.438	0	0	0	463	0	0.006	0.004	0.003	0.003	0.002	0.828011	190/10000	3	2.71069e-263
FingerMtnordMG_2_bin.99	ButProsudMG_2	0.014	1.722	0	0	0	470	0	0.001	0.001	0	0	0	0.779864	54/10000	3	1.95691e-47
FingerMtsudMG_2_bin.2	ButProsudMG_2	2.022	3.705	0	0	3	103982	96.2475	0.434	0.367	0.302	0.24	0.184	0.920152	1742/10000	5	0
FingerMtsudMG_2_bin.24	ButProsudMG_2	0.817	12.386	0	0	0	18201	90.55	0.031	0.026	0.024	0.022	0.02	0.853821	362/10000	10	0
FingerMtsudMG_2_bin.25	ButProsudMG_2	0.676	1.043	0	0	1	13860	96.0886	0.409	0.168	0.063	0.022	0.007	0.954064	3725/10000	1	0
FingerMtsudMG_2_bin.3	ButProsudMG_2	0.036	0.43	0	0	0	1212	93.0687	0.015	0.008	0.004	0.002	0.002	0.813773	132/10000	2	7.00606e-163
FingerMtsudMG_2_bin.49	ButProsudMG_2	6.575	7.323	4	6	9	190885	99.6809	0.958	0.924	0.863	0.775	0.667	0.996248	9241/10000	5	0
FingerMtsudMG_2_bin.5	ButProsudMG_2	0.02	2.288	0	0	0	414	0	0	0	0	0	0	0.755851	28/10000	3	5.21035e-18
FingerMtsudMG_2_bin.50	ButProsudMG_2	0.001	0.04	0	0	0	10	0	0	0	0	0	0	0.776264	49/10000	3	2.99347e-41
FingerMtsudMG_2_bin.66	ButProsudMG_2	0	0	0	0	0	0	0	0	0	0	0	0	0.77145	43/10000	2	4.02667e-34
FingerMtsudMG_2_bin.74	ButProsudMG_2	1.481	12.105	0	0	0	34794	91.7811	0.063	0.053	0.046	0.042	0.039	0.857685	398/10000	13	0
FingerMtsudMG_2_bin.9	ButProsudMG_2	0.257	2.692	0	0	0	15775	92.0034	0.087	0.049	0.03	0.019	0.013	0.859098	412/10000	2	0
KnobheadnordMG_2_bin.23	ButProsudMG_2	10.185	46.942	0	0	2	302234	96.0132	0.497	0.308	0.214	0.17	0.148	0.953438	3674/10000	2	0
KnobheadnordMG_2_bin.34	ButProsudMG_2	0.005	0.543	0	0	0	143	0	0.001	0	0	0	0	0.80944	118/10000	3	3.61103e-140
KnobheadnordMG_2_bin.72	ButProsudMG_2	0.19	2.513	0	0	0	4440	91.2586	0.047	0.032	0.023	0.017	0.012	0.85696	391/10000	4	0
KnobheadsudMG_2_bin.2	ButProsudMG_2	1.78	12.699	0	0	0	44685	91.3284	0.106	0.059	0.044	0.039	0.036	0.876049	621/10000	5	0
KnobheadsudMG_2_bin.4	ButProsudMG_2	0.085	7.584	0	0	0	1774	89.2092	0.004	0.001	0.001	0	0	0.808112	114/10000	1	8.25727e-134
KnobheadsudMG_2_bin.48	ButProsudMG_2	0	0.047	0	0	0	12	0	0	0	0	0	0	0.769703	41/10000	2	8.00762e-32
KnobheadsudMG_2_bin.80	ButProsudMG_2	0.161	1.264	0	0	0	7409	91.5619	0.066	0.035	0.019	0.012	0.007	0.85493	372/10000	2	0
LinTernordMG_2_bin.2	ButProsudMG_2	1.282	14.092	0	0	0	39473	91.7262	0.048	0.041	0.036	0.033	0.03	0.86037	425/10000	13	0
LinTernordMG_2_bin.21	ButProsudMG_2	0.635	6.113	0	0	0	36779	92.286	0.074	0.058	0.049	0.042	0.035	0.874196	594/10000	5	0
LinTernordMG_2_bin.22	ButProsudMG_2	2.531	25.687	0	0	0	76049	91.9101	0.05	0.044	0.04	0.038	0.036	0.859197	413/10000	17	0
LinTernordMG_2_bin.4	ButProsudMG_2	0.748	7.016	0	0	0	21297	91.041	0.038	0.032	0.028	0.025	0.023	0.841233	265/10000	10	0
LinTernordMG_2_bin.44	ButProsudMG_2	0.499	6.905	0	0	0	13370	90.6821	0.02	0.017	0.015	0.014	0.013	0.851276	340/10000	6	0
LinTernordMG_2_bin.8	ButProsudMG_2	3.055	22.108	0	0	0	96640	91.9705	0.106	0.075	0.063	0.057	0.053	0.885556	779/10000	5	0
MtNewZealnordMG_2_bin.1	ButProsudMG_2	0.353	11.922	0	0	0	7657	89.9024	0.021	0.007	0.003	0.003	0.003	0.834527	224/10000	1	0
MtNewZealnordMG_2_bin.10	ButProsudMG_2	0.062	2.077	0	0	0	2290	89.6945	0.009	0.004	0.003	0.002	0.002	0.822229	164/10000	2	3.81471e-217
MtNewZealnordMG_2_bin.105	ButProsudMG_2	0.011	1.409	0	0	0	257	0	0.001	0	0	0	0	0.77145	43/10000	2	4.02667e-34
MtNewZealnordMG_2_bin.16	ButProsudMG_2	0.026	2.591	0	0	0	742	0	0.001	0	0	0	0	0.798212	88/10000	4	4.4526e-94
MtNewZealnordMG_2_bin.19	ButProsudMG_2	0.048	6.667	0	0	0	1143	0	0.001	0	0	0	0	0.775502	48/10000	2	4.86836e-40
MtNewZealnordMG_2_bin.25	ButProsudMG_2	0.336	8.514	0	0	0	11260	91.0915	0.042	0.029	0.021	0.017	0.014	0.849944	329/10000	4	0
MtNewZealnordMG_2_bin.27	ButProsudMG_2	2.105	20.768	0	0	0	79750	92.2782	0.05	0.04	0.036	0.033	0.031	0.858093	402/10000	8	0
MtNewZealnordMG_2_bin.7	ButProsudMG_2	0.06	2.406	0	0	0	1821	89.6816	0.012	0.003	0.002	0.001	0.001	0.78902	69/10000	1	3.99091e-67
MtNewZealnordMG_2_bin.74	ButProsudMG_2	0.003	0.557	0	0	0	337	0	0	0	0	0	0	0.799903	92/10000	5	5.40097e-100
MtNewZealnordMG_2_bin.9	ButProsudMG_2	0.339	12.558	0	0	0	5384	89.7762	0.024	0.008	0.005	0.004	0.003	0.841384	266/10000	1	0
PudButnordMG_2_bin.11	ButProsudMG_2	0.006	0.222	0	0	0	202	0	0.001	0.001	0.001	0.001	0	0.733716	15/10000	4	7.5351e-07
PudButnordMG_2_bin.13	ButProsudMG_2	0.005	0.7	0	0	0	172	0	0	0	0	0	0	0.750323	24/10000	1	3.12042e-14
PudButnordMG_2_bin.2	ButProsudMG_2	0.23	7.304	0	0	0	4629	0	0.009	0.007	0.005	0.004	0.004	0.828011	190/10000	4	2.71069e-263
PudButnordMG_2_bin.22	ButProsudMG_2	0.886	2.908	0	0	1	47725	94.9761	0.288	0.199	0.132	0.084	0.052	0.894455	961/10000	3	0
PudButnordMG_2_bin.3	ButProsudMG_2	0.251	3.72	0	0	0	14341	91.5551	0.041	0.032	0.025	0.02	0.016	0.849449	325/10000	4	0
PudButnordMG_2_bin.36	ButProsudMG_2	0	0.048	0	0	0	18	0	0	0	0	0	0	0.78902	69/10000	2	3.99091e-67
PudButnordMG_2_bin.42	ButProsudMG_2	0.03	0.571	0	0	0	1088	0	0.004	0.004	0.003	0.003	0.002	0.778463	52/10000	1	6.17262e-45
PudButnordMG_2_bin.5	ButProsudMG_2	1.721	8.621	0	0	0	23974	92.4085	0.146	0.125	0.11	0.099	0.09	0.881058	700/10000	16	0
PudButnordMG_2_bin.53	ButProsudMG_2	0.003	0.362	0	0	0	212	0	0	0	0	0	0	0.803466	101/10000	2	1.4085e-113
PudButnordMG_2_bin.56	ButProsudMG_2	0.001	0.088	0	0	0	64	0	0	0	0	0	0	0.801526	96/10000	2	5.50224e-106
PudButnordMG_2_bin.59	ButProsudMG_2	0.001	0.028	0	0	0	15	0	0	0	0	0	0	0.748804	23/10000	1	2.49021e-13
PudButnordMG_2_bin.60	ButProsudMG_2	0.017	0.587	0	0	0	705	0	0.001	0.001	0.001	0.001	0.001	0.760672	32/10000	2	4.96893e-22
PudButnordMG_2_bin.67	ButProsudMG_2	0.017	1.555	0	0	0	455	0	0.001	0	0	0	0	0.795532	82/10000	4	2.36166e-85
PudButnordMG_2_bin.81	ButProsudMG_2	1.12	17.009	0	0	0	29082	91.5026	0.034	0.027	0.023	0.02	0.018	0.844294	286/10000	6	0
PudButnordMG_2_bin.85	ButProsudMG_2	0.012	0.195	0	0	0	382	90.3256	0.007	0.003	0.001	0.001	0	0.794122	79/10000	2	4.62107e-81
PudButnordMG_2_bin.88	ButProsudMG_2	0.002	0.066	0	0	0	52	0	0.001	0	0	0	0	0.787916	67/10000	2	2.0682e-64
PudButnordMG_2_bin.90	ButProsudMG_2	0.16	2.236	0	0	0	8279	91.2002	0.031	0.02	0.014	0.01	0.008	0.839062	251/10000	3	0
PudButnordMG_2_bin.95	ButProsudMG_2	0.007	1.562	0	0	0	998	0	0	0	0	0	0	0.800315	93/10000	2	1.74368e-101
PudButsudMG_2_bin.15	ButProsudMG_2	0.009	0.259	0	0	0	239	0	0.004	0.002	0.001	0	0	0.78902	69/10000	2	3.99091e-67
PudButsudMG_2_bin.38	ButProsudMG_2	0.185	11.267	0	0	0	8307	89.6084	0.018	0.008	0.005	0.004	0.003	0.814066	133/10000	2	1.57552e-164
PudButsudMG_2_bin.44	ButProsudMG_2	0.013	1.11	0	0	0	591	0	0.002	0	0	0	0	0.801526	96/10000	2	5.50224e-106
PudButsudMG_2_bin.46	ButProsudMG_2	0	0.009	0	0	0	3	0	0	0	0	0	0	0.762871	34/10000	3	4.0203e-24
PudButsudMG_2_bin.57	ButProsudMG_2	0.141	3.9	0	0	0	4533	90.4335	0.025	0.016	0.011	0.008	0.006	0.846083	299/10000	5	0
PudButsudMG_2_bin.59	ButProsudMG_2	0.224	1.324	0	0	0	13462	91.8763	0.083	0.046	0.027	0.017	0.011	0.864852	474/10000	2	0
PudButsudMG_2_bin.62	ButProsudMG_2	48.89	31.871	39	52	61	1737110	98.9896	0.929	0.916	0.907	0.9	0.893	0.992601	8556/10000	43	0
PudButsudMG_2_bin.78	ButProsudMG_2	3.242	27.983	0	0	0	80499	92.4767	0.103	0.088	0.078	0.071	0.065	0.869463	530/10000	19	0
RickerHillsnord_2_bin.11	ButProsudMG_2	1.766	4.968	0	0	0	48875	93.3017	0.204	0.172	0.152	0.135	0.122	0.887099	808/10000	13	0
RickerHillsnord_2_bin.17	ButProsudMG_2	0.147	4.808	0	0	0	3125	0	0.006	0.003	0.003	0.002	0.002	0.83363	219/10000	3	0
RickerHillsnord_2_bin.19	ButProsudMG_2	0.477	13.495	0	0	0	9380	89.9096	0.087	0.025	0.008	0.005	0.004	0.87853	659/10000	1	0
RickerHillsnord_2_bin.23	ButProsudMG_2	1.27	20.151	0	0	0	40607	91.9385	0.027	0.024	0.021	0.02	0.018	0.836603	236/10000	11	0
RickerHillsnord_2_bin.25	ButProsudMG_2	0.024	1.873	0	0	0	831	0	0.004	0.002	0.001	0.001	0.001	0.797339	86/10000	3	3.7776e-91
RickerHillsnord_2_bin.26	ButProsudMG_2	2.645	12.459	0	0	0	61303	92.5733	0.12	0.105	0.095	0.088	0.082	0.871746	560/10000	28	0
RickerHillsnord_2_bin.29	ButProsudMG_2	1.826	14.567	0	0	0	29206	91.2443	0.049	0.043	0.039	0.036	0.033	0.851514	342/10000	17	0
RickerHillsnord_2_bin.30	ButProsudMG_2	91.167	49.928	76	98	113	2038208	98.6973	0.914	0.911	0.909	0.907	0.906	0.98746	7672/10000	70	0
RickerHillsnord_2_bin.32	ButProsudMG_2	0.064	0.926	0	0	0	1767	90.6887	0.021	0.012	0.008	0.005	0.004	0.843009	277/10000	4	0
RickerHillsnord_2_bin.34	ButProsudMG_2	10.011	57.606	0	0	0	600980	93.5645	0.195	0.171	0.157	0.147	0.139	0.901947	1145/10000	14	0
RickerHillsnord_2_bin.36	ButProsudMG_2	2.581	20.095	0	0	0	102121	92.0257	0.066	0.058	0.053	0.049	0.046	0.867054	500/10000	16	0
RickerHillsnord_2_bin.37	ButProsudMG_2	1.723	17.122	0	0	0	42924	91.6318	0.04	0.034	0.03	0.027	0.025	0.858498	406/10000	12	0
RickerHillsnord_2_bin.48	ButProsudMG_2	4.54	7.683	2	4	6	115537	99.2634	0.901	0.777	0.645	0.521	0.415	0.989642	8036/10000	3	0
RickerHillsnord_2_bin.50	ButProsudMG_2	0.542	5.303	0	0	0	11211	90.9502	0.109	0.039	0.018	0.013	0.011	0.89176	902/10000	1	0
RickerHillsnord_2_bin.54	ButProsudMG_2	0.123	2.467	0	0	0	4305	89.9088	0.027	0.014	0.009	0.007	0.005	0.842718	275/10000	2	0
RickerHillsnord_2_bin.55	ButProsudMG_2	1.847	17.535	0	0	0	55350	92.0667	0.053	0.045	0.04	0.037	0.035	0.862623	449/10000	9	0
RickerHillsnord_2_bin.63	ButProsudMG_2	0.045	0.819	0	0	0	1789	0	0.005	0.004	0.004	0.004	0.003	0.778463	52/10000	1	6.17262e-45
RickerHillsnord_2_bin.8	ButProsudMG_2	2.066	5.211	0	0	0	50633	93.7935	0.238	0.204	0.18	0.161	0.145	0.885448	777/10000	14	0
RicNunsandstonMG_3_bin.1	ButProsudMG_2	1.66	19.417	0	0	0	25732	0	0.024	0.02	0.018	0.017	0.016	0.846352	301/10000	9	0
RicNunsandstonMG_3_bin.11	ButProsudMG_2	0.006	1.203	0	0	0	687	0	0	0	0	0	0	0.77917	53/10000	2	3.50826e-46
RicNunsandstonMG_3_bin.12	ButProsudMG_2	0.156	0.89	0	0	0	3837	91.0961	0.068	0.034	0.018	0.011	0.006	0.861885	441/10000	2	0
RicNunsandstonMG_3_bin.13	ButProsudMG_2	0.002	0.056	0	0	0	19	0	0.001	0	0	0	0	0.77917	53/10000	2	3.50826e-46
RicNunsandstonMG_3_bin.19	ButProsudMG_2	0.006	0.158	0	0	0	175	88.9669	0.004	0.001	0	0	0	0.793153	77/10000	2	3.15038e-78
RicNunsandstonMG_3_bin.21	ButProsudMG_2	0.031	3.574	0	0	0	755	0	0.002	0.001	0	0	0	0.801127	95/10000	2	1.75976e-104
RicNunsandstonMG_3_bin.25	ButProsudMG_2	0.071	0.641	0	0	0	2060	90.4301	0.026	0.015	0.009	0.006	0.004	0.84093	263/10000	4	0
RicNunsandstonMG_3_bin.26	ButProsudMG_2	0.086	2.954	0	0	0	1174	0	0.004	0.003	0.002	0.002	0.002	0.802701	99/10000	3	1.58028e-110
RicNunsandstonMG_3_bin.35	ButProsudMG_2	0.001	0.038	0	0	0	54	0	0.001	0	0	0	0	0.742022	19/10000	1	6.50224e-10
RicNunsandstonMG_3_bin.43	ButProsudMG_2	0.076	0.796	0	0	0	1629	91.121	0.021	0.014	0.01	0.007	0.005	0.841535	267/10000	4	0
RicNunsandstonMG_3_bin.47	ButProsudMG_2	0.006	0.155	0	0	0	103	0	0.002	0.002	0.001	0.001	0	0.809766	119/10000	3	9.08832e-142
RicNunsandstonMG_3_bin.48	ButProsudMG_2	0.152	2.083	0	0	0	6208	91.0092	0.03	0.018	0.013	0.01	0.007	0.841384	266/10000	4	0
RicNunsandstonMG_3_bin.58	ButProsudMG_2	0	0	0	0	0	0	0	0	0	0	0	0	0.768798	40/10000	9	1.08943e-30
RicNunsandstonMG_3_bin.62	ButProsudMG_2	0.004	0.135	0	0	0	93	0	0.002	0.001	0	0	0	0.777011	50/10000	1	1.80374e-42
RicNunsandstonMG_3_bin.63	ButProsudMG_2	0.001	0.126	0	0	0	25	0	0	0	0	0	0	0.784403	61/10000	2	1.9985e-56
RicNunsandstonMG_3_bin.67	ButProsudMG_2	0.001	0.029	0	0	0	33	0	0.001	0	0	0	0	0.748804	23/10000	1	2.49021e-13
RicNunsandstonMG_3_bin.7	ButProsudMG_2	0.071	10.007	0	0	0	2047	0	0	0	0	0	0	0.733716	15/10000	1	7.5351e-07
RicNunsandstonMG_3_bin.70	ButProsudMG_2	0.026	4.463	0	0	0	1921	0	0.003	0.001	0	0	0	0.795532	82/10000	1	2.36166e-85
RicNunsandstonMG_3_bin.74	ButProsudMG_2	0.096	0.8	0	0	0	2528	91.3785	0.029	0.019	0.013	0.009	0.006	0.843585	281/10000	5	0
RicNunsandstonMG_3_bin.78	ButProsudMG_2	0.122	1.35	0	0	0	5373	91.0766	0.029	0.018	0.012	0.009	0.007	0.841535	267/10000	4	0
RicNunsandstonMG_3_bin.85	ButProsudMG_2	0.002	0.043	0	0	0	75	0	0.002	0	0	0	0	0.748804	23/10000	1	2.49021e-13
RicNunsandstonMG_3_bin.86	ButProsudMG_2	0.009	0.194	0	0	0	215	0	0.004	0.001	0.001	0.001	0.001	0.781874	57/10000	2	3.0451e-51
RicNunsandstonMG_3_bin.88	ButProsudMG_2	0.012	1.704	0	0	0	462	0	0.002	0	0	0	0	0.797778	87/10000	2	1.30442e-92
RicNunsandstonMG_3_bin.89	ButProsudMG_2	0.485	10.24	0	0	0	16284	90.8315	0.015	0.011	0.01	0.009	0.008	0.834527	224/10000	4	0
RicNunsandstonMG_3_bin.90	ButProsudMG_2	0.025	0.948	0	0	0	536	0	0.002	0.001	0.001	0.001	0.001	0.754543	27/10000	4	4.84554e-17
RicNunsandstonMG_3_bin.91	ButProsudMG_2	0.001	0.077	0	0	0	56	0	0	0	0	0	0	0.815215	137/10000	2	3.73686e-171
RicNunsandstonMG_3_bin.93	ButProsudMG_2	0.04	1.09	0	0	0	1468	89.8025	0.012	0.004	0.002	0.002	0.001	0.818482	149/10000	1	2.48885e-191
RicNunsandstonMG_3_bin.94	ButProsudMG_2	0.098	2.274	0	0	0	2490	90.51	0.029	0.017	0.011	0.007	0.005	0.851868	345/10000	4	0
RicNunsandstonMG_3_bin.95	ButProsudMG_2	0	0.01	0	0	0	2	0	0	0	0	0	0	0.707565	7/10000	1	0.0350472
RicNunsandstonMG_4_bin.33	ButProsudMG_2	0.022	0.409	0	0	0	755	89.0321	0.011	0.004	0.002	0.001	0.001	0.802701	99/10000	2	1.58028e-110
RicNunsandstonMG_4_bin.58	ButProsudMG_2	0.188	3.117	0	0	0	5580	91.0736	0.087	0.025	0.007	0.003	0.002	0.886467	796/10000	1	0
RicNunsandstonMG_4_bin.63	ButProsudMG_2	0.02	2.393	0	0	0	407	0	0	0	0	0	0	0.768798	40/10000	2	1.08943e-30
RicNunsandstonMG_4_bin.75	ButProsudMG_2	0.021	1.036	0	0	0	353	0	0.003	0.001	0.001	0.001	0.001	0.819769	154/10000	3	7.27426e-200
RicNunsandstonMG_4_bin.86	ButProsudMG_2	0.965	17.407	0	0	0	17824	0	0.011	0.007	0.006	0.005	0.005	0.83488	226/10000	3	0
RicNunsandstonMG_4_bin.87	ButProsudMG_2	0.827	5.322	0	0	1	22124	95.1396	0.416	0.19	0.082	0.038	0.018	0.941295	2807/10000	1	0
RicNunsandstonMG_4_bin.94	ButProsudMG_2	2.612	3.532	0	2	4	137658	97.51	0.678	0.565	0.436	0.314	0.212	0.97049	5331/10000	3	0
SiePeanordMG_2_bin.15	ButProsudMG_2	0.1	1.247	0	0	0	4181	90.8469	0.026	0.015	0.01	0.007	0.005	0.834349	223/10000	3	0
SiePeanordMG_2_bin.16	ButProsudMG_2	0.006	0.717	0	0	0	164	0	0.001	0	0	0	0	0.766923	38/10000	1	1.87132e-28
SiePeanordMG_2_bin.21	ButProsudMG_2	0.356	9.796	0	0	0	8686	0	0.008	0.007	0.006	0.006	0.005	0.822467	165/10000	5	6.8928e-219
SiePeanordMG_2_bin.24	ButProsudMG_2	0.001	0.027	0	0	0	19	0	0.001	0	0	0	0	0.763925	35/10000	2	3.4612e-25
SiePeanordMG_2_bin.38	ButProsudMG_2	0.001	0.099	0	0	0	44	0	0	0	0	0	0	0.751783	25/10000	4	3.75505e-15
SiePeanordMG_2_bin.41	ButProsudMG_2	4.307	28.52	0	0	0	132034	92.701	0.097	0.085	0.077	0.072	0.067	0.883845	748/10000	10	0
SiePeanordMG_2_bin.44	ButProsudMG_2	1.866	18.712	0	0	0	47572	91.8102	0.09	0.058	0.044	0.037	0.033	0.877955	650/10000	3	0
SiePeanordMG_2_bin.53	ButProsudMG_2	1.235	8.016	0	0	1	33297	94.172	0.322	0.145	0.068	0.039	0.027	0.918225	1667/10000	1	0
SiePeanordMG_2_bin.56	ButProsudMG_2	0.382	7.49	0	0	0	10069	90.7682	0.021	0.014	0.011	0.01	0.009	0.845267	293/10000	4	0
SiePeanordMG_2_bin.60	ButProsudMG_2	37.053	44.626	14	21	46	1063909	99.4474	0.935	0.929	0.924	0.918	0.912	0.995836	9161/10000	15	0
SiePeanordMG_2_bin.70	ButProsudMG_2	2.063	18.349	0	0	0	57103	93.2772	0.054	0.046	0.042	0.039	0.037	0.862256	445/10000	14	0
SiePeanordMG_2_bin.71	ButProsudMG_2	0	0	0	0	0	0	0	0	0	0	0	0	0.766923	38/10000	2	1.87132e-28
SiePeanordMG_2_bin.9	ButProsudMG_2	0.084	1.107	0	0	0	2847	90.7529	0.022	0.013	0.009	0.007	0.005	0.840624	261/10000	4	0
SiePeasudMG_2_bin.1	ButProsudMG_2	0.503	6.801	0	0	0	12120	90.7615	0.019	0.016	0.014	0.013	0.012	0.842718	275/10000	13	0
SiePeasudMG_2_bin.102	ButProsudMG_2	0.221	8.838	0	0	0	5258	0	0.005	0.004	0.003	0.003	0.003	0.815778	139/10000	4	1.74078e-174
SiePeasudMG_2_bin.103	ButProsudMG_2	0.018	0.602	0	0	0	350	0	0.003	0.002	0.001	0.001	0.001	0.812278	127/10000	3	1.08495e-154
SiePeasudMG_2_bin.105	ButProsudMG_2	0.044	2.289	0	0	0	1593	0	0.002	0.001	0.001	0.001	0.001	0.792159	75/10000	2	2.03899e-75
SiePeasudMG_2_bin.106	ButProsudMG_2	0.282	5.807	0	0	0	7242	91.0457	0.013	0.01	0.008	0.008	0.007	0.824549	174/10000	6	1.07797e-234
SiePeasudMG_2_bin.11	ButProsudMG_2	0.275	4.135	0	0	0	3442	90.1539	0.015	0.013	0.011	0.01	0.009	0.842131	271/10000	7	0
SiePeasudMG_2_bin.112	ButProsudMG_2	0.003	0.498	0	0	0	111	0	0	0	0	0	0	0.760672	32/10000	2	4.96893e-22
SiePeasudMG_2_bin.114	ButProsudMG_2	0.001	0.107	0	0	0	21	0	0	0	0	0	0	0.748804	23/10000	1	2.49021e-13
SiePeasudMG_2_bin.118	ButProsudMG_2	0.344	6.595	0	0	0	9070	90.7966	0.021	0.016	0.013	0.012	0.011	0.837107	239/10000	6	0
SiePeasudMG_2_bin.12	ButProsudMG_2	0.003	0.392	0	0	0	80	0	0	0	0	0	0	0.754543	27/10000	1	4.84554e-17
SiePeasudMG_2_bin.121	ButProsudMG_2	0	0.028	0	0	0	12	0	0	0	0	0	0	0.757115	29/10000	1	5.41045e-19
SiePeasudMG_2_bin.16	ButProsudMG_2	0.061	1.857	0	0	0	1279	0	0.004	0.003	0.003	0.003	0.002	0.810726	122/10000	8	1.37753e-146
SiePeasudMG_2_bin.2	ButProsudMG_2	1.089	14.404	0	0	0	22183	91.1312	0.035	0.029	0.025	0.023	0.021	0.848822	320/10000	10	0
SiePeasudMG_2_bin.22	ButProsudMG_2	0.011	0.323	0	0	0	474	0	0.002	0.001	0.001	0.001	0.001	0.775502	48/10000	2	4.86836e-40
SiePeasudMG_2_bin.25	ButProsudMG_2	0.032	1.68	0	0	0	615	0	0.001	0.001	0.001	0.001	0.001	0.762871	34/10000	2	4.0203e-24
SiePeasudMG_2_bin.29	ButProsudMG_2	0	0	0	0	0	0	0	0	0	0	0	0	0.755851	28/10000	1	5.21035e-18
SiePeasudMG_2_bin.3	ButProsudMG_2	0.252	4.732	0	0	0	5618	91.1224	0.015	0.012	0.01	0.009	0.008	0.832899	215/10000	9	0
SiePeasudMG_2_bin.31	ButProsudMG_2	1.303	9.155	0	0	0	26294	91.8848	0.067	0.057	0.051	0.047	0.043	0.856541	387/10000	15	0
SiePeasudMG_2_bin.35	ButProsudMG_2	0.02	0.313	0	0	0	542	89.7893	0.008	0.005	0.003	0.002	0.001	0.840777	262/10000	3	0
SiePeasudMG_2_bin.36	ButProsudMG_2	0.003	0.128	0	0	0	101	0	0.001	0.001	0	0	0	0.754543	27/10000	2	4.84554e-17
SiePeasudMG_2_bin.38	ButProsudMG_2	0.392	5.645	0	0	0	8142	91.1139	0.018	0.014	0.012	0.011	0.01	0.836264	234/10000	9	0
SiePeasudMG_2_bin.40	ButProsudMG_2	0.186	1.481	0	0	0	10573	91.563	0.059	0.037	0.024	0.016	0.011	0.851514	342/10000	3	0
SiePeasudMG_2_bin.41	ButProsudMG_2	0	0.011	0	0	0	2	0	0	0	0	0	0	0.768798	40/10000	4	1.08943e-30
SiePeasudMG_2_bin.44	ButProsudMG_2	0.097	2.66	0	0	0	2369	0	0.004	0.003	0.003	0.003	0.002	0.816881	143/10000	4	3.46354e-181
SiePeasudMG_2_bin.47	ButProsudMG_2	0.004	0.269	0	0	0	123	0	0.001	0	0	0	0	0.784403	61/10000	2	1.9985e-56
SiePeasudMG_2_bin.50	ButProsudMG_2	0.066	6.33	0	0	0	2280	90.5827	0.005	0.003	0.002	0.002	0.001	0.811665	125/10000	4	1.93831e-151
SiePeasudMG_2_bin.51	ButProsudMG_2	0.337	4.863	0	0	0	9708	90.5338	0.018	0.014	0.013	0.011	0.01	0.83985	256/10000	8	0
SiePeasudMG_2_bin.52	ButProsudMG_2	0.007	0.219	0	0	0	192	0	0.002	0.001	0.001	0.001	0.001	0.804954	105/10000	3	9.93785e-120
SiePeasudMG_2_bin.55	ButProsudMG_2	0.068	9.103	0	0	0	1600	0	0	0	0	0	0	0.74722	22/10000	1	1.90527e-12
SiePeasudMG_2_bin.56	ButProsudMG_2	0.021	1.272	0	0	0	659	0	0.001	0.001	0.001	0	0	0.784403	61/10000	3	1.9985e-56
SiePeasudMG_2_bin.58	ButProsudMG_2	0.011	0.521	0	0	0	187	0	0.001	0.001	0.001	0.001	0.001	0.819769	154/10000	4	7.27426e-200
SiePeasudMG_2_bin.59	ButProsudMG_2	0.168	6.29	0	0	0	3392	0	0.005	0.004	0.003	0.003	0.003	0.821262	160/10000	3	3.36299e-210
SiePeasudMG_2_bin.62	ButProsudMG_2	0.079	0.547	0	0	0	3454	90.9936	0.036	0.019	0.01	0.006	0.003	0.833991	221/10000	3	0
SiePeasudMG_2_bin.63	ButProsudMG_2	0.448	5.801	0	0	0	8012	90.4647	0.024	0.02	0.017	0.015	0.014	0.834349	223/10000	15	0
SiePeasudMG_2_bin.64	ButProsudMG_2	1.322	20.463	0	0	0	29926	91.031	0.031	0.026	0.023	0.021	0.019	0.849697	327/10000	10	0
SiePeasudMG_2_bin.65	ButProsudMG_2	0.244	9.546	0	0	0	5181	0	0.005	0.004	0.003	0.003	0.003	0.816881	143/10000	3	3.46354e-181
SiePeasudMG_2_bin.67	ButProsudMG_2	0.012	2.577	0	0	0	1217	0	0.001	0	0	0	0	0.801127	95/10000	4	1.75976e-104
SiePeasudMG_2_bin.68	ButProsudMG_2	2.182	11.722	0	0	0	55276	92.243	0.089	0.079	0.073	0.067	0.063	0.870696	546/10000	16	0
SiePeasudMG_2_bin.69	ButProsudMG_2	0.016	3.088	0	0	0	1353	0	0	0	0	0	0	0.787352	66/10000	3	4.60465e-63
SiePeasudMG_2_bin.7	ButProsudMG_2	0.002	0.117	0	0	0	35	0	0.001	0	0	0	0	0.797778	87/10000	3	1.30442e-92
SiePeasudMG_2_bin.71	ButProsudMG_2	0.213	7.477	0	0	0	5501	0	0.004	0.004	0.003	0.003	0.003	0.824323	173/10000	5	6.29697e-233
SiePeasudMG_2_bin.73	ButProsudMG_2	1.015	2.152	0	0	1	50515	95.5831	0.35	0.243	0.16	0.101	0.061	0.899914	1092/10000	3	0
SiePeasudMG_2_bin.74	ButProsudMG_2	0	0.009	0	0	0	2	0	0	0	0	0	0	0.759523	31/10000	1	5.27805e-21
SiePeasudMG_2_bin.76	ButProsudMG_2	0	0	0	0	0	0	0	0	0	0	0	0	0.751783	25/10000	4	3.75505e-15
SiePeasudMG_2_bin.77	ButProsudMG_2	0.081	1.654	0	0	0	668	0	0.005	0.004	0.004	0.004	0.003	0.825221	177/10000	3	5.22274e-240
SiePeasudMG_2_bin.79	ButProsudMG_2	0	0.012	0	0	0	3	0	0	0	0	0	0	0.742022	19/10000	1	6.50224e-10
SiePeasudMG_2_bin.8	ButProsudMG_2	0.158	2.684	0	0	0	2658	0	0.007	0.006	0.005	0.005	0.004	0.821262	160/10000	16	3.36299e-210
SiePeasudMG_2_bin.82	ButProsudMG_2	0.002	0.22	0	0	0	83	0	0	0	0	0	0	0.785609	63/10000	3	4.63678e-59
SiePeasudMG_2_bin.83	ButProsudMG_2	0	0	0	0	0	0	0	0	0	0	0	0	0.777011	50/10000	4	1.80374e-42
SiePeasudMG_2_bin.84	ButProsudMG_2	0	0.057	0	0	0	21	0	0	0	0	0	0	0.770586	42/10000	1	5.74564e-33
SiePeasudMG_2_bin.85	ButProsudMG_2	0.553	7.293	0	0	0	9514	90.3026	0.027	0.022	0.019	0.018	0.016	0.850067	330/10000	11	0
SiePeasudMG_2_bin.86	ButProsudMG_2	1.757	16.18	0	0	0	44793	91.6345	0.06	0.053	0.048	0.044	0.041	0.85696	391/10000	19	0
SiePeasudMG_2_bin.87	ButProsudMG_2	0.033	1.064	0	0	0	564	0	0.004	0.002	0.002	0.001	0.001	0.824096	172/10000	4	3.65686e-231
SiePeasudMG_2_bin.89	ButProsudMG_2	0.066	2.326	0	0	0	754	0	0.004	0.003	0.002	0.002	0.002	0.817955	147/10000	4	6.15427e-188
SiePeasudMG_2_bin.92	ButProsudMG_2	0.001	0.104	0	0	0	27	0	0	0	0	0	0	0.812278	127/10000	2	1.08495e-154
SiePeasudMG_2_bin.93	ButProsudMG_2	0.018	1.18	0	0	0	523	0	0.002	0.001	0.001	0.001	0	0.797339	86/10000	2	3.7776e-91
SiePeasudMG_2_bin.95	ButProsudMG_2	0.105	2.297	0	0	0	1148	0	0.008	0.006	0.005	0.004	0.004	0.816057	140/10000	10	3.71636e-176
TrioNunataknord_2_bin.100	ButProsudMG_2	0.172	10.225	0	0	0	1060	0	0.001	0.001	0.001	0.001	0.001	0.785011	62/10000	5	9.70401e-58
TrioNunataknord_2_bin.101	ButProsudMG_2	0.058	4.899	0	0	0	1376	0	0.003	0.002	0.001	0.001	0.001	0.811354	124/10000	3	8.09448e-150
TrioNunataknord_2_bin.117	ButProsudMG_2	0.006	0.805	0	0	0	160	0	0	0	0	0	0	0.74722	22/10000	1	1.90527e-12
TrioNunataknord_2_bin.126	ButProsudMG_2	0.347	4.818	0	0	0	8230	90.3616	0.016	0.014	0.012	0.011	0.01	0.824774	175/10000	16	1.83464e-236
TrioNunataknord_2_bin.24	ButProsudMG_2	0.046	3.926	0	0	0	1153	0	0.001	0.001	0	0	0	0.767872	39/10000	4	1.44601e-29
TrioNunataknord_2_bin.27	ButProsudMG_2	0.01	0.442	0	0	0	116	0	0.002	0.001	0.001	0	0	0.821989	163/10000	3	2.09818e-215
TrioNunataknord_2_bin.28	ButProsudMG_2	0.027	1.639	0	0	0	908	0	0.002	0.001	0.001	0.001	0.001	0.743837	20/10000	5	9.75596e-11
TrioNunataknord_2_bin.29	ButProsudMG_2	4.67	32.437	0	0	0	124306	92.2994	0.115	0.093	0.082	0.075	0.07	0.868516	518/10000	5	0
TrioNunataknord_2_bin.33	ButProsudMG_2	0.106	9.757	0	0	0	1466	0	0.003	0.002	0.002	0.001	0.001	0.797339	86/10000	3	3.7776e-91
TrioNunataknord_2_bin.44	ButProsudMG_2	0.019	1.903	0	0	0	618	0	0.002	0.001	0.001	0	0	0.802313	98/10000	3	5.21355e-109
TrioNunataknord_2_bin.46	ButProsudMG_2	0.171	9.879	0	0	0	3405	0	0.003	0.002	0.002	0.002	0.002	0.808782	116/10000	2	5.55616e-137
TrioNunataknord_2_bin.58	ButProsudMG_2	0.055	1.74	0	0	0	1073	0	0.004	0.003	0.002	0.002	0.002	0.841535	267/10000	4	0
TrioNunataknord_2_bin.6	ButProsudMG_2	0.762	7.983	0	0	0	21603	91.1259	0.033	0.028	0.025	0.023	0.021	0.858397	405/10000	6	0
TrioNunataknord_2_bin.63	ButProsudMG_2	0.723	12.195	0	0	0	23341	90.9387	0.029	0.023	0.02	0.018	0.017	0.832528	213/10000	10	1.94865e-305
TrioNunataknord_2_bin.66	ButProsudMG_2	0.003	0.101	0	0	0	54	0	0.001	0.001	0	0	0	0.822703	166/10000	2	1.23783e-220
TrioNunataknord_2_bin.69	ButProsudMG_2	0.015	0.472	0	0	0	680	0	0.002	0.002	0.001	0.001	0.001	0.762871	34/10000	1	4.0203e-24
TrioNunataknord_2_bin.79	ButProsudMG_2	1.23	15.359	0	0	0	16509	0	0.031	0.024	0.021	0.019	0.017	0.854821	371/10000	9	0
TrioNunataknord_2_bin.83	ButProsudMG_2	0.162	9.185	0	0	0	3925	0	0.002	0.002	0.002	0.002	0.001	0.808112	114/10000	3	8.25727e-134
TrioNunataknord_2_bin.9	ButProsudMG_2	0.027	1.108	0	0	0	383	0	0.003	0.002	0.001	0.001	0.001	0.820273	156/10000	2	2.67914e-203
TrioNunataknord_2_bin.90	ButProsudMG_2	0.027	0.564	0	0	0	915	0	0.004	0.003	0.003	0.003	0.002	0.766923	38/10000	2	1.87132e-28
TrioNunataknord_2_bin.94	ButProsudMG_2	0.354	4.833	0	0	0	6143	0	0.015	0.013	0.012	0.011	0.01	0.835923	232/10000	15	0
TrioNunataknord_2_bin.95	ButProsudMG_2	0	0.007	0	0	0	1	0	0	0	0	0	0	0.773932	46/10000	2	1.20973e-37
UniValnordMG_2_bin.12	ButProsudMG_2	0.158	0.806	0	0	0	5651	90.9971	0.073	0.036	0.019	0.011	0.006	0.859493	416/10000	2	0
UniValnordMG_2_bin.14	ButProsudMG_2	0.021	0.285	0	0	0	620	89.4458	0.01	0.005	0.003	0.002	0.001	0.804954	105/10000	2	9.93785e-120
UniValnordMG_2_bin.23	ButProsudMG_2	3.995	4.91	1	3	6	114016	97.1753	0.757	0.653	0.551	0.456	0.37	0.958141	4074/10000	3	0
UniValnordMG_2_bin.36	ButProsudMG_2	26.67	25.307	19	25	30	643583	99.677	0.967	0.963	0.96	0.958	0.956	0.99728	9444/10000	21	0
UniValnordMG_2_bin.45	ButProsudMG_2	1.353	13.916	0	0	0	27573	92.2381	0.167	0.066	0.032	0.024	0.021	0.909113	1352/10000	1	0
UniValnordMG_2_bin.58	ButProsudMG_2	5.035	4.143	2	5	7	188674	98.4702	0.829	0.792	0.727	0.639	0.534	0.981926	6818/10000	5	0
UniValnordMG_2_bin.66	ButProsudMG_2	0.164	0.779	0	0	0	4075	91.5382	0.079	0.036	0.018	0.01	0.006	0.863886	463/10000	2	0
UniValsudMG_2_bin.107	ButProsudMG_2	0.083	7.494	0	0	0	1781	88.9708	0.006	0.001	0.001	0	0	0.817152	144/10000	1	7.186e-183
UniValsudMG_2_bin.109	ButProsudMG_2	0.009	0.71	0	0	0	64	0	0	0	0	0	0	0.766923	38/10000	3	1.87132e-28
UniValsudMG_2_bin.113	ButProsudMG_2	0.101	5.132	0	0	0	1877	0	0.003	0.002	0.002	0.002	0.002	0.817152	144/10000	3	7.186e-183
UniValsudMG_2_bin.125	ButProsudMG_2	0.014	0.382	0	0	0	459	89.5152	0.007	0.003	0.001	0	0	0.801127	95/10000	2	1.75976e-104
UniValsudMG_2_bin.127	ButProsudMG_2	0.002	0.122	0	0	0	54	0	0	0	0	0	0	0.763925	35/10000	2	3.4612e-25
UniValsudMG_2_bin.16	ButProsudMG_2	0.06	3.29	0	0	0	1841	0	0.001	0.001	0.001	0.001	0.001	0.788472	68/10000	2	9.15208e-66
UniValsudMG_2_bin.19	ButProsudMG_2	0.002	0.065	0	0	0	33	0	0.001	0	0	0	0	0.779864	54/10000	2	1.95691e-47
UniValsudMG_2_bin.26	ButProsudMG_2	19.63	10.466	14	21	26	595041	99.0266	0.917	0.912	0.907	0.903	0.898	0.991647	8385/10000	18	0
UniValsudMG_2_bin.27	ButProsudMG_2	5.293	27.929	0	0	0	194184	93.8416	0.122	0.108	0.099	0.093	0.088	0.896278	1003/10000	20	0
UniValsudMG_2_bin.44	ButProsudMG_2	1.997	16.951	0	0	0	43049	92.3374	0.055	0.046	0.04	0.037	0.035	0.863078	454/10000	20	0
UniValsudMG_2_bin.59	ButProsudMG_2	1.015	14.593	0	0	0	20195	91.1604	0.029	0.025	0.022	0.02	0.018	0.84554	295/10000	16	0
UniValsudMG_2_bin.68	ButProsudMG_2	0.253	9.684	0	0	0	5951	0	0.005	0.004	0.003	0.003	0.003	0.82696	185/10000	3	2.73365e-254
UniValsudMG_2_bin.71	ButProsudMG_2	0.14	3.53	0	0	0	2988	0	0.006	0.005	0.004	0.004	0.003	0.813773	132/10000	4	7.00606e-163
UniValsudMG_2_bin.79	ButProsudMG_2	0.08	6.019	0	0	0	1795	0	0.002	0.001	0.001	0.001	0.001	0.810409	121/10000	3	5.61291e-145
BatPronordMG_2_bin.40	FingerMtnordMG_2	22.804	44.494	0	1	27	800237	97.1006	0.6	0.496	0.443	0.414	0.396	0.949498	3368/10000	3	0
BatPronordMG_2_bin.42	FingerMtnordMG_2	11.949	11.112	3	11	19	407252	96.83	0.816	0.783	0.755	0.729	0.703	0.960437	4284/10000	9	0
ButProsudMG_2_bin.21	FingerMtnordMG_2	0.518	2.85	0	0	0	17949	93.123	0.242	0.095	0.038	0.019	0.012	0.923894	1897/10000	1	0
FingerMtnordMG_2_bin.101	FingerMtnordMG_2	26.542	23.589	16	21	27	806390	99.9919	1	1	0.999	0.999	0.998	0.99999	9998/10000	17	0
FingerMtnordMG_2_bin.102	FingerMtnordMG_2	19.448	10.503	15	18	23	430270	99.9962	1	1	0.999	0.998	0.997	1	10000/10000	15	0
FingerMtnordMG_2_bin.103	FingerMtnordMG_2	13.284	7.299	9	13	16	128043	99.9028	0.999	0.997	0.991	0.981	0.965	0.999986	9997/10000	10	0
FingerMtnordMG_2_bin.104	FingerMtnordMG_2	46.047	17.136	36	44	53	1098588	99.9967	1	1	1	1	1	1	10000/10000	34	0
FingerMtnordMG_2_bin.109	FingerMtnordMG_2	513.059	202.202	468	507	542	13553511	99.9937	1	1	1	1	1	0.999995	9999/10000	411	0
FingerMtnordMG_2_bin.118	FingerMtnordMG_2	20.755	12.744	15	19	24	550512	99.9711	0.999	0.998	0.996	0.993	0.99	0.999995	9999/10000	15	0
FingerMtnordMG_2_bin.120	FingerMtnordMG_2	186.395	39.758	168	184	201	3463116	99.9979	1	1	1	1	1	1	10000/10000	155	0
FingerMtnordMG_2_bin.121	FingerMtnordMG_2	101.623	175.482	55	68	91	5887962	99.9702	1	1	1	1	1	1	10000/10000	52	0
FingerMtnordMG_2_bin.125	FingerMtnordMG_2	30.699	23.322	25	30	35	759831	99.9968	1	1	1	0.999	0.999	1	10000/10000	25	0
FingerMtnordMG_2_bin.130	FingerMtnordMG_2	20.053	13.737	12	17	23	550257	99.9888	1	0.999	0.998	0.997	0.993	0.99999	9998/10000	13	0
FingerMtnordMG_2_bin.137	FingerMtnordMG_2	13.736	8.967	9	12	16	394611	99.9534	0.999	0.997	0.992	0.983	0.967	0.999976	9995/10000	10	0
FingerMtnordMG_2_bin.15	FingerMtnordMG_2	24.292	90.83	9	12	17	687981	99.9528	1	0.998	0.994	0.986	0.971	0.99999	9998/10000	10	0
FingerMtnordMG_2_bin.17	FingerMtnordMG_2	249.326	46.493	228	246	266	10297600	99.9995	1	1	1	1	1	1	10000/10000	212	0
FingerMtnordMG_2_bin.18	FingerMtnordMG_2	89.515	20.628	79	88	98	4523409	99.9996	1	1	1	1	1	1	10000/10000	76	0
FingerMtnordMG_2_bin.19	FingerMtnordMG_2	23.59	9.615	19	23	28	575950	99.9986	1	1	1	1	0.999	1	10000/10000	20	0
FingerMtnordMG_2_bin.22	FingerMtnordMG_2	38.4	18.078	31	37	43	1457647	99.9981	1	1	1	1	1	1	10000/10000	31	0
FingerMtnordMG_2_bin.24	FingerMtnordMG_2	13.106	8.452	9	12	15	521088	99.994	1	0.999	0.996	0.99	0.978	1	10000/10000	10	0
FingerMtnordMG_2_bin.29	FingerMtnordMG_2	28.147	21.774	17	23	33	801846	99.9899	1	1	0.999	0.999	0.998	1	10000/10000	17	0
FingerMtnordMG_2_bin.3	FingerMtnordMG_2	80.093	22.845	70	80	89	2136964	99.9948	1	1	1	1	1	1	10000/10000	66	0
FingerMtnordMG_2_bin.31	FingerMtnordMG_2	11.854	6.816	8	11	14	271484	99.9801	1	0.997	0.991	0.981	0.962	0.999971	9994/10000	10	0
FingerMtnordMG_2_bin.33	FingerMtnordMG_2	43.847	13.223	37	43	49	1296385	99.9994	1	1	1	1	1	1	10000/10000	37	0
FingerMtnordMG_2_bin.35	FingerMtnordMG_2	16.968	56.341	8	11	15	428731	99.9922	1	0.998	0.995	0.986	0.969	0.99999	9998/10000	9	0
FingerMtnordMG_2_bin.38	FingerMtnordMG_2	144.045	59.06	124	138	153	3616644	99.9964	1	1	1	1	1	1	10000/10000	116	0
FingerMtnordMG_2_bin.41	FingerMtnordMG_2	136.783	40.453	118	131	144	2628831	99.9999	1	1	1	1	1	1	10000/10000	112	0
FingerMtnordMG_2_bin.53	FingerMtnordMG_2	62.319	64.03	37	54	71	1946703	99.9509	1	1	1	0.999	0.999	1	10000/10000	26	0
FingerMtnordMG_2_bin.57	FingerMtnordMG_2	52.768	101.884	37	44	51	1593053	99.991	1	1	1	1	0.999	1	10000/10000	38	0
FingerMtnordMG_2_bin.58	FingerMtnordMG_2	18.232	9.213	13	17	21	307356	99.9871	1	0.999	0.998	0.997	0.994	0.999995	9999/10000	14	0
FingerMtnordMG_2_bin.61	FingerMtnordMG_2	15.274	21.409	11	14	18	357523	99.9955	1	0.999	0.997	0.994	0.988	0.99999	9998/10000	12	0
FingerMtnordMG_2_bin.63	FingerMtnordMG_2	91.662	32.657	80	90	101	4160034	99.998	1	1	1	1	1	1	10000/10000	77	0
FingerMtnordMG_2_bin.65	FingerMtnordMG_2	14.014	8.233	10	13	17	550272	99.9975	1	0.999	0.997	0.993	0.983	1	10000/10000	11	0
FingerMtnordMG_2_bin.66	FingerMtnordMG_2	25.579	12.989	19	23	29	1125891	99.9985	1	1	1	0.999	0.999	1	10000/10000	19	0
FingerMtnordMG_2_bin.70	FingerMtnordMG_2	178.095	43.529	160	176	192	5763277	99.9993	1	1	1	1	1	1	10000/10000	149	0
FingerMtnordMG_2_bin.85	FingerMtnordMG_2	22.47	13.054	17	21	26	1090178	99.9981	1	1	0.999	0.999	0.998	1	10000/10000	18	0
FingerMtnordMG_2_bin.86	FingerMtnordMG_2	18.039	21.083	12	15	19	798522	99.9708	1	0.999	0.997	0.993	0.988	1	10000/10000	13	0
FingerMtnordMG_2_bin.89	FingerMtnordMG_2	15.709	12.808	10	13	17	329564	99.9872	1	0.998	0.995	0.989	0.977	0.999986	9997/10000	10	0
FingerMtnordMG_2_bin.9	FingerMtnordMG_2	23.67	13.357	16	21	28	1055080	99.9972	1	1	0.999	0.998	0.997	1	10000/10000	17	0
FingerMtnordMG_2_bin.94	FingerMtnordMG_2	13.671	16.961	8	11	15	315805	99.9612	1	0.997	0.991	0.978	0.955	0.99999	9998/10000	9	0
FingerMtnordMG_2_bin.96	FingerMtnordMG_2	30.186	19.857	14	25	44	584722	99.9286	1	0.999	0.998	0.995	0.99	1	10000/10000	11	0
FingerMtnordMG_2_bin.98	FingerMtnordMG_2	10.662	9.858	7	10	13	193107	99.9923	1	0.997	0.989	0.973	0.941	0.99999	9998/10000	9	0
FingerMtnordMG_2_bin.99	FingerMtnordMG_2	24.614	21.299	20	24	28	844384	99.9986	1	1	1	0.999	0.999	1	10000/10000	21	0
FingerMtsudMG_2_bin.2	FingerMtnordMG_2	51.426	51.979	23	38	78	2646517	99.6164	0.96	0.944	0.927	0.913	0.901	0.997345	9457/10000	25	0
FingerMtsudMG_2_bin.24	FingerMtnordMG_2	1.213	15.424	0	0	0	27086	91.399	0.093	0.064	0.052	0.046	0.042	0.912476	1461/10000	5	0
FingerMtsudMG_2_bin.25	FingerMtnordMG_2	0.661	5.253	0	0	0	13572	91.3893	0.033	0.028	0.025	0.024	0.023	0.860177	423/10000	18	0
FingerMtsudMG_2_bin.3	FingerMtnordMG_2	3.839	9.792	1	2	4	129085	98.9873	0.794	0.634	0.463	0.317	0.209	0.985777	7402/10000	3	0
FingerMtsudMG_2_bin.49	FingerMtnordMG_2	29.003	70.129	16	21	27	840591	99.9014	0.993	0.99	0.988	0.986	0.983	0.999101	9813/10000	17	0
FingerMtsudMG_2_bin.5	FingerMtnordMG_2	6.676	25.606	1	3	6	140506	98.6677	0.842	0.684	0.534	0.417	0.332	0.983466	7046/10000	2	0
FingerMtsudMG_2_bin.50	FingerMtnordMG_2	13.816	64.852	0	0	0	256662	93.9543	0.246	0.223	0.209	0.199	0.19	0.910438	1394/10000	56	0
FingerMtsudMG_2_bin.66	FingerMtnordMG_2	5.321	11.709	1	2	5	98509	98.6133	0.756	0.559	0.417	0.323	0.264	0.977934	6259/10000	2	0
FingerMtsudMG_2_bin.74	FingerMtnordMG_2	0.118	1.789	0	0	0	2773	90.2014	0.02	0.011	0.008	0.006	0.005	0.880333	688/10000	4	0
FingerMtsudMG_2_bin.9	FingerMtnordMG_2	8.827	24.223	0	2	7	509438	97.5651	0.72	0.594	0.494	0.417	0.357	0.965422	4776/10000	3	0
KnobheadnordMG_2_bin.23	FingerMtnordMG_2	0.491	5.976	0	0	0	14547	91.2382	0.054	0.033	0.024	0.019	0.016	0.889737	860/10000	4	0
KnobheadnordMG_2_bin.34	FingerMtnordMG_2	17.102	25.984	2	12	22	466993	96.4942	0.785	0.75	0.722	0.696	0.671	0.958443	4101/10000	15	0
KnobheadnordMG_2_bin.72	FingerMtnordMG_2	10.703	57.879	0	1	5	248975	96.5744	0.526	0.432	0.359	0.303	0.26	0.940197	2739/10000	6	0
KnobheadsudMG_2_bin.2	FingerMtnordMG_2	0.876	20.579	0	0	0	21957	92.9363	0.161	0.085	0.046	0.028	0.019	0.900266	1101/10000	2	0
KnobheadsudMG_2_bin.4	FingerMtnordMG_2	50.66	62.485	36	51	62	1054763	95.4174	0.906	0.898	0.892	0.887	0.882	0.962791	4510/10000	48	0
KnobheadsudMG_2_bin.48	FingerMtnordMG_2	1.287	9.277	0	0	0	36379	91.3543	0.077	0.063	0.055	0.049	0.045	0.87916	669/10000	12	0
KnobheadsudMG_2_bin.80	FingerMtnordMG_2	7.006	30.447	0	2	6	306380	96.9946	0.625	0.525	0.442	0.375	0.32	0.9509	3474/10000	4	0
LinTernordMG_2_bin.2	FingerMtnordMG_2	30.319	26.261	23	31	38	936774	99.681	0.959	0.95	0.944	0.939	0.936	0.99745	9478/10000	24	0
LinTernordMG_2_bin.21	FingerMtnordMG_2	74.502	207.74	20	40	64	4306175	98.0047	0.926	0.907	0.893	0.883	0.874	0.988808	7895/10000	22	0
LinTernordMG_2_bin.22	FingerMtnordMG_2	0.997	24.442	0	0	0	29880	92.4448	0.186	0.075	0.036	0.022	0.017	0.920602	1760/10000	1	0
LinTernordMG_2_bin.4	FingerMtnordMG_2	1.982	3.143	0	1	3	56593	98.3065	0.734	0.498	0.302	0.17	0.09	0.980458	6607/10000	2	0
LinTernordMG_2_bin.44	FingerMtnordMG_2	3.604	5.874	2	3	5	97440	98.913	0.884	0.753	0.586	0.423	0.286	0.989354	7987/10000	3	0
LinTernordMG_2_bin.8	FingerMtnordMG_2	1.967	21.439	0	1	2	62208	97.2892	0.623	0.408	0.243	0.138	0.077	0.969879	5261/10000	2	0
MtNewZealnordMG_2_bin.1	FingerMtnordMG_2	7.379	12.807	0	3	11	160401	96.734	0.663	0.578	0.523	0.482	0.447	0.94619	3130/10000	8	0
MtNewZealnordMG_2_bin.10	FingerMtnordMG_2	6.492	20.567	0	2	7	241438	96.9863	0.653	0.546	0.474	0.417	0.367	0.954886	3793/10000	3	0
MtNewZealnordMG_2_bin.105	FingerMtnordMG_2	18.307	74.073	0	1	4	432491	96.4826	0.592	0.444	0.343	0.281	0.244	0.948232	3275/10000	2	0
MtNewZealnordMG_2_bin.16	FingerMtnordMG_2	16.769	32.347	1	12	21	476525	96.5568	0.768	0.731	0.703	0.678	0.656	0.957657	4031/10000	15	0
MtNewZealnordMG_2_bin.19	FingerMtnordMG_2	83.54	67.556	68	80	92	1997315	98.1612	0.935	0.933	0.932	0.931	0.929	0.983948	7119/10000	68	0
MtNewZealnordMG_2_bin.25	FingerMtnordMG_2	24.654	136.61	0	2	6	824748	96.9904	0.659	0.52	0.419	0.349	0.296	0.950547	3447/10000	5	0
MtNewZealnordMG_2_bin.27	FingerMtnordMG_2	0.717	8.57	0	0	0	27169	92.3735	0.101	0.065	0.045	0.035	0.028	0.900344	1103/10000	3	0
MtNewZealnordMG_2_bin.7	FingerMtnordMG_2	11.334	12.24	2	10	18	331072	97.1251	0.811	0.773	0.739	0.708	0.678	0.947761	3241/10000	10	0
MtNewZealnordMG_2_bin.74	FingerMtnordMG_2	4.189	12.13	0	0	1	174982	94.5303	0.271	0.235	0.211	0.192	0.176	0.914625	1535/10000	14	0
MtNewZealnordMG_2_bin.9	FingerMtnordMG_2	2.509	29.707	0	1	3	39512	98.283	0.712	0.497	0.308	0.179	0.099	0.977823	6244/10000	2	0
PudButnordMG_2_bin.11	FingerMtnordMG_2	0.377	7.065	0	0	0	12962	91.7393	0.029	0.022	0.018	0.016	0.014	0.839062	251/10000	5	9.40935e-293
PudButnordMG_2_bin.13	FingerMtnordMG_2	0.387	9.679	0	0	0	12135	93.227	0.197	0.074	0.026	0.009	0.003	0.889688	859/10000	1	0
PudButnordMG_2_bin.2	FingerMtnordMG_2	1.017	8.696	0	0	0	20394	91.805	0.049	0.04	0.035	0.032	0.029	0.88803	826/10000	9	0
PudButnordMG_2_bin.22	FingerMtnordMG_2	0.236	3.357	0	0	0	12677	89.9896	0.025	0.014	0.01	0.009	0.008	0.880576	692/10000	5	0
PudButnordMG_2_bin.3	FingerMtnordMG_2	20.252	122.214	0	0	6	1156575	95.0458	0.362	0.323	0.297	0.278	0.263	0.936983	2549/10000	18	0
PudButnordMG_2_bin.36	FingerMtnordMG_2	0.015	0.252	0	0	0	540	88.4772	0.009	0.003	0.001	0	0	0.854379	367/10000	2	0
PudButnordMG_2_bin.42	FingerMtnordMG_2	0.054	0.96	0	0	0	1975	90.3032	0.009	0.005	0.004	0.003	0.003	0.78902	69/10000	3	5.61823e-45
PudButnordMG_2_bin.5	FingerMtnordMG_2	4.998	11.41	0	0	6	69514	95.1116	0.398	0.353	0.319	0.293	0.27	0.919314	1709/10000	12	0
PudButnordMG_2_bin.53	FingerMtnordMG_2	1.363	5.55	0	0	0	42098	93.3233	0.222	0.151	0.112	0.086	0.07	0.912802	1472/10000	5	0
PudButnordMG_2_bin.56	FingerMtnordMG_2	3.165	12.086	0	0	0	136357	93.7061	0.197	0.169	0.15	0.136	0.125	0.909273	1357/10000	14	0
PudButnordMG_2_bin.59	FingerMtnordMG_2	0.568	0.969	0	0	1	14375	94.6498	0.345	0.143	0.052	0.019	0.006	0.933326	2348/10000	1	0
PudButnordMG_2_bin.60	FingerMtnordMG_2	0.074	1.036	0	0	0	3030	88.9362	0.024	0.008	0.004	0.003	0.003	0.819001	151/10000	1	2.01864e-144
PudButnordMG_2_bin.67	FingerMtnordMG_2	0.146	12.268	0	0	0	3933	0	0.004	0.003	0.002	0.002	0.001	0.867791	509/10000	5	0
PudButnordMG_2_bin.81	FingerMtnordMG_2	0.212	2.293	0	0	0	5503	91.2238	0.023	0.017	0.014	0.012	0.01	0.874196	594/10000	4	0
PudButnordMG_2_bin.85	FingerMtnordMG_2	2.411	9.14	0	0	1	73916	94.6822	0.292	0.224	0.18	0.149	0.128	0.903351	1183/10000	4	0
PudButnordMG_2_bin.88	FingerMtnordMG_2	1.477	4.461	0	0	0	36253	93.907	0.208	0.166	0.139	0.119	0.104	0.890032	866/10000	9	0
PudButnordMG_2_bin.90	FingerMtnordMG_2	43.17	172.233	1	4	27	2241000	97.4801	0.761	0.656	0.573	0.514	0.473	0.968036	5055/10000	4	0
PudButnordMG_2_bin.95	FingerMtnordMG_2	3.911	13.233	0	0	0	188851	94.3708	0.244	0.21	0.187	0.17	0.156	0.914455	1529/10000	13	0
PudButsudMG_2_bin.15	FingerMtnordMG_2	1.617	8.405	0	0	0	44043	94.0343	0.215	0.169	0.139	0.118	0.102	0.893059	930/10000	8	0
PudButsudMG_2_bin.38	FingerMtnordMG_2	11.787	31.109	1	11	18	372697	96.5985	0.774	0.744	0.719	0.695	0.67	0.952527	3601/10000	9	0
PudButsudMG_2_bin.44	FingerMtnordMG_2	24.076	44.022	0	0	30	846862	96.1937	0.499	0.454	0.426	0.406	0.392	0.927571	2062/10000	22	0
PudButsudMG_2_bin.46	FingerMtnordMG_2	5.578	12.508	0	0	6	150879	96.2174	0.424	0.367	0.327	0.299	0.275	0.915552	1568/10000	15	0
PudButsudMG_2_bin.57	FingerMtnordMG_2	13.155	81.813	0	1	4	313797	97.2118	0.658	0.464	0.347	0.281	0.24	0.965834	4819/10000	3	0
PudButsudMG_2_bin.59	FingerMtnordMG_2	6.818	17.913	0	1	6	409735	96.8636	0.578	0.486	0.412	0.353	0.304	0.944505	3015/10000	5	0
PudButsudMG_2_bin.62	FingerMtnordMG_2	0.125	2.515	0	0	0	4422	89.7646	0.019	0.01	0.006	0.005	0.004	0.860849	430/10000	3	0
PudButsudMG_2_bin.78	FingerMtnordMG_2	0.866	5.349	0	0	0	21490	91.9678	0.098	0.076	0.063	0.054	0.047	0.895158	977/10000	5	0
RickerHillsnord_2_bin.11	FingerMtnordMG_2	22.485	10.4	17	23	28	623933	98.2992	0.959	0.947	0.936	0.928	0.921	0.990144	8122/10000	19	0
RickerHillsnord_2_bin.17	FingerMtnordMG_2	1.942	28.639	0	0	0	41450	91.4984	0.098	0.072	0.063	0.056	0.051	0.906544	1274/10000	7	0
RickerHillsnord_2_bin.19	FingerMtnordMG_2	4.958	35.977	0	0	4	97445	95.5655	0.399	0.346	0.308	0.275	0.247	0.920602	1760/10000	12	0
RickerHillsnord_2_bin.23	FingerMtnordMG_2	0.28	14.665	0	0	0	8900	90.9869	0.017	0.012	0.009	0.007	0.006	0.873132	579/10000	6	0
RickerHillsnord_2_bin.25	FingerMtnordMG_2	3.636	25.898	0	0	0	126143	93.7808	0.239	0.198	0.174	0.156	0.142	0.906815	1282/10000	10	0
RickerHillsnord_2_bin.26	FingerMtnordMG_2	0.649	7.707	0	0	0	15023	91.417	0.061	0.043	0.034	0.029	0.025	0.90705	1289/10000	6	0
RickerHillsnord_2_bin.29	FingerMtnordMG_2	0.634	6.78	0	0	0	10143	91.6632	0.056	0.043	0.037	0.033	0.029	0.89733	1028/10000	7	0
RickerHillsnord_2_bin.30	FingerMtnordMG_2	0.809	5.345	0	0	0	18044	93.5954	0.207	0.112	0.063	0.041	0.03	0.911484	1428/10000	3	0
RickerHillsnord_2_bin.32	FingerMtnordMG_2	5.07	45.192	0	0	0	140613	92.6515	0.133	0.112	0.1	0.091	0.084	0.915301	1559/10000	14	0
RickerHillsnord_2_bin.34	FingerMtnordMG_2	0.567	3.91	0	0	0	33997	92.4159	0.106	0.065	0.044	0.032	0.026	0.900188	1099/10000	2	0
RickerHillsnord_2_bin.36	FingerMtnordMG_2	0.734	14.753	0	0	0	29050	91.123	0.093	0.049	0.034	0.028	0.025	0.899914	1092/10000	2	0
RickerHillsnord_2_bin.37	FingerMtnordMG_2	1.585	11.723	0	0	1	39239	93.79	0.269	0.136	0.082	0.062	0.051	0.934908	2433/10000	2	0
RickerHillsnord_2_bin.48	FingerMtnordMG_2	21.04	87.634	6	12	22	534506	98.9488	0.98	0.949	0.905	0.855	0.804	0.996274	9246/10000	5	0
RickerHillsnord_2_bin.50	FingerMtnordMG_2	0.427	3.754	0	0	0	8829	92.6322	0.161	0.072	0.033	0.018	0.011	0.904144	1205/10000	2	0
RickerHillsnord_2_bin.54	FingerMtnordMG_2	70.447	163.51	35	58	78	2458217	95.5853	0.913	0.903	0.894	0.887	0.88	0.967329	4978/10000	48	0
RickerHillsnord_2_bin.55	FingerMtnordMG_2	0.417	6.442	0	0	0	12480	91.3772	0.036	0.023	0.018	0.015	0.012	0.886148	790/10000	5	0
RickerHillsnord_2_bin.63	FingerMtnordMG_2	0.098	3.635	0	0	0	3871	89.5278	0.014	0.007	0.005	0.004	0.003	0.807773	113/10000	1	5.70605e-95
RickerHillsnord_2_bin.8	FingerMtnordMG_2	4.079	6.754	0	2	4	100080	96.8296	0.674	0.516	0.389	0.3	0.242	0.945377	3074/10000	3	0
RicNunsandstonMG_3_bin.1	FingerMtnordMG_2	1.642	4.489	0	1	2	25505	96.8849	0.552	0.312	0.166	0.094	0.056	0.966262	4864/10000	2	0
RicNunsandstonMG_3_bin.11	FingerMtnordMG_2	10.856	7.638	7	10	13	426215	99.118	0.988	0.969	0.943	0.91	0.869	0.997565	9501/10000	7	0
RicNunsandstonMG_3_bin.12	FingerMtnordMG_2	10.244	18.762	3	5	9	251635	99.3909	0.938	0.861	0.763	0.654	0.548	0.994124	8836/10000	4	0
RicNunsandstonMG_3_bin.13	FingerMtnordMG_2	10.444	29.743	0	2	5	94001	98.3418	0.75	0.551	0.405	0.314	0.261	0.978128	6285/10000	2	0
RicNunsandstonMG_3_bin.19	FingerMtnordMG_2	236.272	78.885	222	247	269	6281372	99.6123	0.982	0.98	0.978	0.977	0.976	0.997845	9557/10000	208	0
RicNunsandstonMG_3_bin.21	FingerMtnordMG_2	37.757	37.133	28	34	41	918061	99.3332	0.974	0.973	0.972	0.971	0.97	0.996223	9236/10000	28	0
RicNunsandstonMG_3_bin.25	FingerMtnordMG_2	15.647	46.561	0	1	12	456654	97.0722	0.584	0.494	0.428	0.381	0.345	0.954658	3774/10000	26	0
RicNunsandstonMG_3_bin.26	FingerMtnordMG_2	74.055	29.489	66	79	89	1018188	99.4683	0.966	0.963	0.96	0.957	0.955	0.996744	9338/10000	66	0
RicNunsandstonMG_3_bin.35	FingerMtnordMG_2	23.62	36.182	0	18	34	833281	95.57	0.72	0.701	0.686	0.672	0.659	0.92549	1967/10000	36	0
RicNunsandstonMG_3_bin.43	FingerMtnordMG_2	44.215	31.805	34	42	50	939480	99.3734	0.975	0.97	0.965	0.96	0.954	0.998265	9642/10000	34	0
RicNunsandstonMG_3_bin.47	FingerMtnordMG_2	12.377	16.748	6	9	13	207543	99.7876	0.988	0.977	0.957	0.924	0.874	0.998182	9625/10000	7	0
RicNunsandstonMG_3_bin.48	FingerMtnordMG_2	62.689	144.163	15	42	64	2564810	98.5996	0.988	0.979	0.966	0.949	0.929	0.99882	9755/10000	8	0
RicNunsandstonMG_3_bin.58	FingerMtnordMG_2	4.561	10.5	0	1	4	92526	96.8389	0.55	0.422	0.333	0.276	0.239	0.940311	2746/10000	3	0
RicNunsandstonMG_3_bin.62	FingerMtnordMG_2	0.387	5.431	0	0	0	9450	91.6845	0.019	0.017	0.014	0.013	0.012	0.852452	350/10000	7	0
RicNunsandstonMG_3_bin.63	FingerMtnordMG_2	11.689	59.999	0	1	6	244131	97.1601	0.6	0.496	0.423	0.365	0.317	0.935417	2461/10000	6	0
RicNunsandstonMG_3_bin.67	FingerMtnordMG_2	74.12	909.873	30	37	47	2805130	99.9608	1	1	0.999	0.999	0.999	0.999881	9975/10000	29	0
RicNunsandstonMG_3_bin.7	FingerMtnordMG_2	57.326	401.962	30	37	46	1650999	99.8933	0.99	0.986	0.983	0.979	0.977	0.999131	9819/10000	30	0
RicNunsandstonMG_3_bin.70	FingerMtnordMG_2	1.903	6.177	0	0	1	46846	93.9498	0.253	0.199	0.165	0.142	0.124	0.90593	1256/10000	5	0
RicNunsandstonMG_3_bin.74	FingerMtnordMG_2	11.174	37.98	0	0	10	294847	95.4708	0.402	0.373	0.351	0.334	0.318	0.918617	1682/10000	32	0
RicNunsandstonMG_3_bin.78	FingerMtnordMG_2	62.312	170.544	12	36	62	2742207	99.0374	0.969	0.959	0.949	0.936	0.921	0.997405	9469/10000	10	0
RicNunsandstonMG_3_bin.85	FingerMtnordMG_2	45.555	35.751	35	42	49	1722669	99.7616	0.963	0.959	0.958	0.956	0.955	0.997969	9582/10000	36	0
RicNunsandstonMG_3_bin.86	FingerMtnordMG_2	230.129	73.117	216	237	258	5497124	99.5489	0.985	0.984	0.983	0.982	0.982	0.997244	9437/10000	202	0
RicNunsandstonMG_3_bin.88	FingerMtnordMG_2	128.545	58.37	88	147	171	4903894	99.5757	0.999	0.999	0.998	0.998	0.998	0.999905	9980/10000	108	0
RicNunsandstonMG_3_bin.89	FingerMtnordMG_2	3.827	19.867	1	3	5	128881	96.9799	0.756	0.672	0.562	0.442	0.329	0.965844	4820/10000	4	0
RicNunsandstonMG_3_bin.90	FingerMtnordMG_2	2.938	2.958	1	3	4	63249	98.7894	0.864	0.694	0.507	0.341	0.213	0.985388	7341/10000	2	0
RicNunsandstonMG_3_bin.91	FingerMtnordMG_2	12.176	15.418	5	7	12	532211	99.7472	0.983	0.959	0.913	0.847	0.763	0.998448	9679/10000	6	0
RicNunsandstonMG_3_bin.93	FingerMtnordMG_2	8.383	24.267	0	0	2	304840	94.5867	0.304	0.269	0.245	0.228	0.215	0.931314	2244/10000	26	0
RicNunsandstonMG_3_bin.94	FingerMtnordMG_2	4.695	28.453	0	0	1	119175	93.6822	0.253	0.153	0.114	0.098	0.089	0.936755	2536/10000	3	0
RicNunsandstonMG_3_bin.95	FingerMtnordMG_2	5.091	31.914	0	0	0	94912	91.6598	0.096	0.084	0.076	0.071	0.067	0.857787	399/10000	42	0
RicNunsandstonMG_4_bin.33	FingerMtnordMG_2	19.347	21.801	1	14	33	670069	97.1955	0.777	0.728	0.695	0.67	0.649	0.954003	3720/10000	9	0
RicNunsandstonMG_4_bin.58	FingerMtnordMG_2	39.082	35.863	9	44	55	1162115	98.3134	0.807	0.792	0.783	0.776	0.77	0.982574	6913/10000	43	0
RicNunsandstonMG_4_bin.63	FingerMtnordMG_2	30.679	28.066	22	31	39	625365	98.5922	0.987	0.98	0.974	0.967	0.96	0.996845	9358/10000	15	0
RicNunsandstonMG_4_bin.75	FingerMtnordMG_2	1.486	7.257	0	0	1	25500	94.7548	0.338	0.161	0.088	0.06	0.047	0.940587	2763/10000	2	0
RicNunsandstonMG_4_bin.86	FingerMtnordMG_2	46.538	42.908	38	51	60	863006	98.2077	0.923	0.91	0.899	0.891	0.884	0.989642	8036/10000	43	0
RicNunsandstonMG_4_bin.87	FingerMtnordMG_2	19.913	104.438	5	10	14	531852	96.3365	0.916	0.883	0.854	0.825	0.79	0.970316	5311/10000	8	0
RicNunsandstonMG_4_bin.94	FingerMtnordMG_2	0.359	5.411	0	0	0	18905	89.9764	0.037	0.018	0.013	0.011	0.01	0.885176	772/10000	4	0
SiePeanordMG_2_bin.15	FingerMtnordMG_2	35.164	144.662	0	4	27	1475442	96.867	0.625	0.564	0.528	0.502	0.48	0.943035	2918/10000	18	0
SiePeanordMG_2_bin.16	FingerMtnordMG_2	0.581	10.015	0	0	1	16931	94.0666	0.31	0.126	0.045	0.016	0.005	0.915774	1576/10000	1	0
SiePeanordMG_2_bin.21	FingerMtnordMG_2	0.607	21.712	0	0	0	14802	91.3604	0.052	0.037	0.028	0.022	0.018	0.887099	808/10000	6	0
SiePeanordMG_2_bin.24	FingerMtnordMG_2	0.005	0.174	0	0	0	161	0	0.002	0.001	0.001	0	0	0.83985	256/10000	7	1.04719e-300
SiePeanordMG_2_bin.38	FingerMtnordMG_2	0.181	1.174	0	0	0	5373	90.87	0.088	0.035	0.017	0.01	0.006	0.885176	772/10000	2	0
SiePeanordMG_2_bin.41	FingerMtnordMG_2	0.485	4.142	0	0	0	14849	91.8332	0.065	0.045	0.035	0.029	0.025	0.893469	939/10000	5	0
SiePeanordMG_2_bin.44	FingerMtnordMG_2	1.248	5.577	0	0	0	31699	93.7585	0.23	0.168	0.127	0.101	0.082	0.916023	1585/10000	4	0
SiePeanordMG_2_bin.53	FingerMtnordMG_2	3.891	7.097	0	1	6	104854	96.7348	0.591	0.484	0.413	0.359	0.313	0.939638	2705/10000	4	0
SiePeanordMG_2_bin.56	FingerMtnordMG_2	0.22	3.495	0	0	0	5805	91.1913	0.041	0.023	0.014	0.01	0.008	0.890952	885/10000	4	0
SiePeanordMG_2_bin.60	FingerMtnordMG_2	2.118	21.578	0	1	2	60829	97.8814	0.632	0.387	0.22	0.124	0.072	0.974959	5871/10000	2	0
SiePeanordMG_2_bin.70	FingerMtnordMG_2	0.181	2.658	0	0	0	4993	91.1538	0.023	0.013	0.009	0.006	0.005	0.861978	442/10000	3	0
SiePeanordMG_2_bin.71	FingerMtnordMG_2	0.126	0.701	0	0	0	2145	90.584	0.054	0.028	0.016	0.01	0.006	0.872626	572/10000	3	0
SiePeanordMG_2_bin.9	FingerMtnordMG_2	53.235	73.532	17	43	67	1802531	96.9569	0.873	0.858	0.847	0.838	0.83	0.973588	5700/10000	36	0
SiePeasudMG_2_bin.1	FingerMtnordMG_2	0.239	2.517	0	0	0	5765	90.5274	0.054	0.023	0.013	0.009	0.008	0.896321	1004/10000	2	0
SiePeasudMG_2_bin.102	FingerMtnordMG_2	0.495	22.051	0	0	0	11780	90.6508	0.047	0.025	0.018	0.013	0.011	0.883902	749/10000	3	0
SiePeasudMG_2_bin.103	FingerMtnordMG_2	0.495	5.803	0	0	0	9668	90.2613	0.036	0.026	0.022	0.019	0.017	0.886942	805/10000	8	0
SiePeasudMG_2_bin.105	FingerMtnordMG_2	0.225	6.18	0	0	0	8264	89.6567	0.012	0.006	0.004	0.003	0.003	0.862532	448/10000	3	0
SiePeasudMG_2_bin.106	FingerMtnordMG_2	0.12	1.619	0	0	0	3084	89.8041	0.027	0.014	0.009	0.007	0.006	0.869228	527/10000	3	0
SiePeasudMG_2_bin.11	FingerMtnordMG_2	0.172	3.725	0	0	0	2156	90.5272	0.018	0.012	0.009	0.007	0.006	0.889092	847/10000	5	0
SiePeasudMG_2_bin.112	FingerMtnordMG_2	0.063	2.899	0	0	0	2057	89.9995	0.027	0.008	0.003	0.002	0.001	0.860177	423/10000	2	0
SiePeasudMG_2_bin.114	FingerMtnordMG_2	0.103	0.906	0	0	0	2938	90.6266	0.071	0.017	0.004	0.001	0	0.881535	708/10000	1	0
SiePeasudMG_2_bin.118	FingerMtnordMG_2	0.253	3.172	0	0	0	6677	90.8474	0.082	0.03	0.014	0.009	0.007	0.901	1120/10000	2	0
SiePeasudMG_2_bin.12	FingerMtnordMG_2	0.029	1.421	0	0	0	790	89.4134	0.011	0.004	0.002	0.001	0	0.847147	307/10000	2	0
SiePeasudMG_2_bin.121	FingerMtnordMG_2	0.021	0.543	0	0	0	702	89.4182	0.011	0.003	0.001	0	0	0.810088	120/10000	1	1.04596e-103
SiePeasudMG_2_bin.16	FingerMtnordMG_2	0.067	0.785	0	0	0	1401	89.9664	0.036	0.01	0.004	0.002	0.001	0.875303	610/10000	2	0
SiePeasudMG_2_bin.2	FingerMtnordMG_2	1.889	29.606	0	0	1	38485	95.3995	0.378	0.193	0.117	0.084	0.066	0.950151	3417/10000	1	0
SiePeasudMG_2_bin.22	FingerMtnordMG_2	0.055	0.475	0	0	0	2389	90.0389	0.035	0.009	0.003	0.002	0.001	0.851157	339/10000	1	0
SiePeasudMG_2_bin.25	FingerMtnordMG_2	0.078	2.458	0	0	0	1484	88.8888	0.017	0.006	0.002	0.002	0.001	0.842864	276/10000	1	0
SiePeasudMG_2_bin.29	FingerMtnordMG_2	0.019	0.172	0	0	0	475	89.476	0.015	0.003	0.001	0	0	0.832714	214/10000	1	2.46682e-235
SiePeasudMG_2_bin.3	FingerMtnordMG_2	0.134	1.98	0	0	0	2930	90.0081	0.029	0.013	0.009	0.007	0.005	0.885121	771/10000	4	0
SiePeasudMG_2_bin.31	FingerMtnordMG_2	0.207	1.996	0	0	0	4181	90.556	0.044	0.025	0.017	0.014	0.012	0.899082	1071/10000	4	0
SiePeasudMG_2_bin.35	FingerMtnordMG_2	1.387	12.652	0	0	0	38258	91.1649	0.067	0.046	0.038	0.035	0.032	0.911026	1413/10000	8	0
SiePeasudMG_2_bin.36	FingerMtnordMG_2	0.029	0.413	0	0	0	1080	89.3866	0.018	0.005	0.001	0.001	0	0.831012	205/10000	1	8.85773e-222
SiePeasudMG_2_bin.38	FingerMtnordMG_2	0.152	1.668	0	0	0	3157	90.0659	0.056	0.021	0.01	0.006	0.005	0.893333	936/10000	2	0
SiePeasudMG_2_bin.40	FingerMtnordMG_2	0.109	1.589	0	0	0	6059	89.9012	0.035	0.013	0.006	0.004	0.003	0.889142	848/10000	2	0
SiePeasudMG_2_bin.41	FingerMtnordMG_2	0.175	0.517	0	0	0	4233	91.6299	0.129	0.035	0.008	0.002	0.001	0.903242	1180/10000	1	0
SiePeasudMG_2_bin.44	FingerMtnordMG_2	0.216	3.946	0	0	0	5274	90.6326	0.034	0.019	0.013	0.009	0.007	0.886041	788/10000	4	0
SiePeasudMG_2_bin.47	FingerMtnordMG_2	0.041	1.191	0	0	0	1233	89.2731	0.016	0.005	0.002	0.001	0.001	0.861699	439/10000	2	0
SiePeasudMG_2_bin.50	FingerMtnordMG_2	0.963	28.062	0	0	0	33502	90.4244	0.039	0.023	0.018	0.016	0.014	0.883336	739/10000	6	0
SiePeasudMG_2_bin.51	FingerMtnordMG_2	0.198	3.471	0	0	0	5712	90.1565	0.037	0.015	0.01	0.007	0.006	0.894054	952/10000	4	0
SiePeasudMG_2_bin.52	FingerMtnordMG_2	0.104	1.462	0	0	0	2846	90.1275	0.043	0.014	0.006	0.004	0.003	0.887876	823/10000	2	0
SiePeasudMG_2_bin.55	FingerMtnordMG_2	0.582	12.373	0	0	1	13717	94.116	0.26	0.083	0.026	0.01	0.004	0.934466	2409/10000	1	0
SiePeasudMG_2_bin.56	FingerMtnordMG_2	0.146	4.506	0	0	0	4682	89.7578	0.016	0.005	0.003	0.003	0.002	0.860944	431/10000	2	0
SiePeasudMG_2_bin.58	FingerMtnordMG_2	0.345	5.444	0	0	0	5980	89.9778	0.029	0.019	0.015	0.013	0.012	0.891191	890/10000	7	0
SiePeasudMG_2_bin.59	FingerMtnordMG_2	1.252	32.675	0	0	0	25152	91.2186	0.051	0.035	0.028	0.025	0.022	0.898357	1053/10000	6	0
SiePeasudMG_2_bin.62	FingerMtnordMG_2	0.078	1.864	0	0	0	3309	89.77	0.016	0.006	0.004	0.003	0.002	0.864503	470/10000	3	0
SiePeasudMG_2_bin.63	FingerMtnordMG_2	0.619	3.339	0	0	1	11077	93.9958	0.261	0.131	0.065	0.032	0.016	0.909145	1353/10000	2	0
SiePeasudMG_2_bin.64	FingerMtnordMG_2	0.786	24.483	0	0	0	17749	91.7979	0.133	0.049	0.024	0.016	0.013	0.919468	1715/10000	2	0
SiePeasudMG_2_bin.65	FingerMtnordMG_2	0.724	14.568	0	0	0	15383	90.7726	0.043	0.029	0.023	0.019	0.017	0.883845	748/10000	5	0
SiePeasudMG_2_bin.67	FingerMtnordMG_2	0.173	1.89	0	0	0	6192	90.4547	0.036	0.022	0.016	0.013	0.01	0.879223	670/10000	5	0
SiePeasudMG_2_bin.68	FingerMtnordMG_2	0.498	5.535	0	0	0	12629	91.3152	0.074	0.039	0.026	0.022	0.019	0.918409	1674/10000	4	0
SiePeasudMG_2_bin.69	FingerMtnordMG_2	0.995	11.221	0	0	0	27674	91.7452	0.094	0.072	0.058	0.051	0.044	0.892784	924/10000	10	0
SiePeasudMG_2_bin.7	FingerMtnordMG_2	0.064	2.102	0	0	0	1022	0	0.01	0.003	0.002	0.002	0.002	0.870923	549/10000	4	0
SiePeasudMG_2_bin.71	FingerMtnordMG_2	0.502	23.668	0	0	0	12957	90.3217	0.033	0.016	0.011	0.009	0.007	0.891901	905/10000	4	0
SiePeasudMG_2_bin.73	FingerMtnordMG_2	0.211	14.698	0	0	0	10472	90.1263	0.028	0.01	0.005	0.004	0.003	0.883845	748/10000	3	0
SiePeasudMG_2_bin.74	FingerMtnordMG_2	0.016	0.158	0	0	0	371	89.5204	0.013	0.003	0	0	0	0.830429	202/10000	1	2.67456e-217
SiePeasudMG_2_bin.76	FingerMtnordMG_2	0.033	0.226	0	0	0	819	89.6202	0.026	0.006	0.001	0	0	0.857272	394/10000	1	0
SiePeasudMG_2_bin.77	FingerMtnordMG_2	0.271	2.637	0	0	0	2224	90.2724	0.09	0.034	0.018	0.013	0.01	0.909844	1375/10000	2	0
SiePeasudMG_2_bin.79	FingerMtnordMG_2	0.183	1.682	0	0	0	4985	91.328	0.106	0.031	0.009	0.004	0.002	0.887099	808/10000	1	0
SiePeasudMG_2_bin.8	FingerMtnordMG_2	0.12	0.792	0	0	0	2027	90.5713	0.075	0.021	0.006	0.003	0.002	0.878339	656/10000	2	0
SiePeasudMG_2_bin.82	FingerMtnordMG_2	0.102	3.949	0	0	0	3363	89.4828	0.013	0.006	0.003	0.003	0.002	0.872481	570/10000	4	0
SiePeasudMG_2_bin.83	FingerMtnordMG_2	0.143	0.469	0	0	0	3451	91.2438	0.106	0.029	0.006	0.002	0	0.895289	980/10000	1	0
SiePeasudMG_2_bin.84	FingerMtnordMG_2	0.034	0.34	0	0	0	1540	89.5618	0.023	0.006	0.001	0.001	0.001	0.836264	234/10000	1	4.77604e-266
SiePeasudMG_2_bin.85	FingerMtnordMG_2	0.325	4.582	0	0	0	5585	89.865	0.031	0.022	0.017	0.015	0.013	0.895765	991/10000	5	0
SiePeasudMG_2_bin.86	FingerMtnordMG_2	0.374	5.033	0	0	0	9530	90.8457	0.05	0.03	0.022	0.018	0.016	0.905308	1238/10000	4	0
SiePeasudMG_2_bin.87	FingerMtnordMG_2	0.81	22.645	0	0	0	14058	90.6428	0.033	0.023	0.019	0.016	0.014	0.893964	950/10000	6	0
SiePeasudMG_2_bin.89	FingerMtnordMG_2	0.259	2.958	0	0	0	2988	91.1055	0.059	0.033	0.021	0.014	0.011	0.891618	899/10000	4	0
SiePeasudMG_2_bin.92	FingerMtnordMG_2	0.076	5.453	0	0	0	2679	89.2709	0.01	0.004	0.002	0.002	0.001	0.879843	680/10000	4	0
SiePeasudMG_2_bin.93	FingerMtnordMG_2	0.31	2.63	0	0	0	8844	92.501	0.167	0.052	0.015	0.006	0.003	0.919468	1715/10000	1	0
SiePeasudMG_2_bin.95	FingerMtnordMG_2	0.232	1.271	0	0	0	2557	91.2894	0.128	0.039	0.012	0.007	0.004	0.91047	1395/10000	1	0
TrioNunataknord_2_bin.100	FingerMtnordMG_2	0.296	14.462	0	0	0	1836	0	0.002	0.001	0.001	0.001	0.001	0.836264	234/10000	7	4.77604e-266
TrioNunataknord_2_bin.101	FingerMtnordMG_2	0.865	30.452	0	0	0	20242	90.9034	0.035	0.027	0.024	0.021	0.019	0.886041	788/10000	10	0
TrioNunataknord_2_bin.117	FingerMtnordMG_2	0.562	13.544	0	0	1	15717	94.2349	0.267	0.116	0.046	0.018	0.006	0.895114	976/10000	1	0
TrioNunataknord_2_bin.126	FingerMtnordMG_2	0.168	3.158	0	0	0	3992	90.9683	0.022	0.014	0.01	0.008	0.007	0.870084	538/10000	4	0
TrioNunataknord_2_bin.24	FingerMtnordMG_2	0.285	23.263	0	0	0	7213	90.5748	0.011	0.005	0.003	0.002	0.002	0.844574	288/10000	2	0
TrioNunataknord_2_bin.27	FingerMtnordMG_2	0.358	4.227	0	0	0	4073	90.3859	0.029	0.022	0.018	0.016	0.014	0.895894	994/10000	8	0
TrioNunataknord_2_bin.28	FingerMtnordMG_2	0.242	4.741	0	0	0	8030	90.4696	0.092	0.025	0.008	0.004	0.002	0.882474	724/10000	1	0
TrioNunataknord_2_bin.29	FingerMtnordMG_2	0.411	6.008	0	0	0	10915	90.9838	0.041	0.027	0.021	0.017	0.015	0.883733	746/10000	4	0
TrioNunataknord_2_bin.33	FingerMtnordMG_2	1.067	23.148	0	0	0	14754	90.5106	0.028	0.023	0.019	0.016	0.015	0.879223	670/10000	10	0
TrioNunataknord_2_bin.44	FingerMtnordMG_2	2.951	24.4	0	0	0	95631	93.5881	0.221	0.182	0.16	0.143	0.131	0.90562	1247/10000	10	0
TrioNunataknord_2_bin.46	FingerMtnordMG_2	1.09	33.16	0	0	0	21719	90.7759	0.036	0.029	0.025	0.022	0.02	0.886784	802/10000	9	0
TrioNunataknord_2_bin.58	FingerMtnordMG_2	0.935	8.269	0	0	0	18262	91.5486	0.059	0.048	0.041	0.036	0.032	0.912088	1448/10000	9	0
TrioNunataknord_2_bin.6	FingerMtnordMG_2	0.248	3.013	0	0	0	7020	90.7251	0.03	0.021	0.017	0.014	0.012	0.901305	1128/10000	5	0
TrioNunataknord_2_bin.63	FingerMtnordMG_2	0.18	1.979	0	0	0	5811	91.456	0.052	0.026	0.014	0.009	0.006	0.879223	670/10000	3	0
TrioNunataknord_2_bin.66	FingerMtnordMG_2	0.104	2.943	0	0	0	2158	0	0.008	0.006	0.004	0.004	0.003	0.885556	779/10000	5	0
TrioNunataknord_2_bin.69	FingerMtnordMG_2	0.08	1.223	0	0	0	3501	89.4478	0.023	0.009	0.004	0.003	0.003	0.811354	124/10000	1	8.83443e-109
TrioNunataknord_2_bin.79	FingerMtnordMG_2	0.199	3.6	0	0	0	2666	90.3741	0.022	0.014	0.011	0.008	0.007	0.887825	822/10000	5	0
TrioNunataknord_2_bin.83	FingerMtnordMG_2	0.538	26.917	0	0	0	13062	90.7625	0.01	0.008	0.007	0.006	0.005	0.87496	605/10000	5	0
TrioNunataknord_2_bin.9	FingerMtnordMG_2	1.058	8.145	0	0	0	15083	91.677	0.058	0.048	0.042	0.037	0.034	0.894054	952/10000	9	0
TrioNunataknord_2_bin.90	FingerMtnordMG_2	0.147	1.905	0	0	0	4955	90.8783	0.012	0.009	0.008	0.007	0.007	0.799487	91/10000	4	8.34402e-69
TrioNunataknord_2_bin.94	FingerMtnordMG_2	0.233	4.893	0	0	0	4020	90.8178	0.015	0.01	0.008	0.007	0.006	0.872408	569/10000	4	0
TrioNunataknord_2_bin.95	FingerMtnordMG_2	0.009	0.452	0	0	0	185	0	0.002	0.001	0.001	0	0	0.838902	250/10000	6	3.62227e-291
UniValnordMG_2_bin.12	FingerMtnordMG_2	6.722	17.166	0	2	6	240155	96.87	0.637	0.537	0.453	0.383	0.324	0.947215	3202/10000	4	0
UniValnordMG_2_bin.14	FingerMtnordMG_2	15.201	19.476	0	8	27	442609	97.2809	0.697	0.654	0.621	0.595	0.572	0.938295	2625/10000	12	0
UniValnordMG_2_bin.23	FingerMtnordMG_2	21.641	58.419	6	12	23	616863	99.209	0.975	0.947	0.907	0.858	0.806	0.996525	9295/10000	5	0
UniValnordMG_2_bin.36	FingerMtnordMG_2	5.318	23.552	1	3	5	128126	98.8852	0.874	0.744	0.589	0.445	0.328	0.989489	8010/10000	3	0
UniValnordMG_2_bin.45	FingerMtnordMG_2	0.674	8.365	0	0	0	13612	92.8278	0.171	0.086	0.044	0.025	0.016	0.902655	1164/10000	3	0
UniValnordMG_2_bin.58	FingerMtnordMG_2	81.121	60.748	41	92	114	3038033	98.3351	0.95	0.939	0.929	0.92	0.912	0.992596	8555/10000	54	0
UniValnordMG_2_bin.66	FingerMtnordMG_2	7.68	37.676	0	1	3	191045	97.1653	0.549	0.376	0.286	0.236	0.203	0.959543	4201/10000	2	0
UniValsudMG_2_bin.107	FingerMtnordMG_2	64.8	60.015	51	59	69	1383222	99.6221	0.995	0.994	0.992	0.991	0.989	0.998741	9739/10000	49	0
UniValsudMG_2_bin.109	FingerMtnordMG_2	0.136	10.171	0	0	0	933	0	0.001	0	0	0	0	0.827172	186/10000	4	9.55718e-194
UniValsudMG_2_bin.113	FingerMtnordMG_2	0.796	31.208	0	0	0	14721	90.7734	0.02	0.016	0.014	0.012	0.011	0.884626	762/10000	7	0
UniValsudMG_2_bin.125	FingerMtnordMG_2	0.882	3.87	0	0	1	29321	94.1997	0.349	0.158	0.073	0.039	0.023	0.933041	2333/10000	1	0
UniValsudMG_2_bin.127	FingerMtnordMG_2	0.005	0.129	0	0	0	172	0	0.003	0.001	0	0	0	0.790094	71/10000	1	4.97176e-47
UniValsudMG_2_bin.16	FingerMtnordMG_2	0.329	21.229	0	0	0	10065	89.4849	0.008	0.004	0.002	0.002	0.002	0.856435	386/10000	4	0
UniValsudMG_2_bin.19	FingerMtnordMG_2	12.424	57.096	0	0	3	259060	95.7656	0.426	0.319	0.257	0.224	0.204	0.917512	1640/10000	3	0
UniValsudMG_2_bin.26	FingerMtnordMG_2	20.46	17.51	13	21	28	620195	98.6142	0.927	0.903	0.884	0.867	0.853	0.991121	8292/10000	18	0
UniValsudMG_2_bin.27	FingerMtnordMG_2	1.243	4.777	0	0	2	45556	95.8337	0.426	0.268	0.156	0.087	0.047	0.930778	2217/10000	2	0
UniValsudMG_2_bin.44	FingerMtnordMG_2	0.353	7.056	0	0	0	7586	89.6366	0.053	0.025	0.016	0.012	0.009	0.880998	699/10000	2	0
UniValsudMG_2_bin.59	FingerMtnordMG_2	1.375	29.76	0	0	0	27320	92.4542	0.135	0.095	0.075	0.061	0.05	0.902949	1172/10000	7	0
UniValsudMG_2_bin.68	FingerMtnordMG_2	0.564	22.91	0	0	0	13266	91.3159	0.041	0.029	0.022	0.017	0.014	0.894543	963/10000	6	0
UniValsudMG_2_bin.71	FingerMtnordMG_2	1.236	9.678	0	0	0	25223	91.6581	0.052	0.044	0.038	0.035	0.032	0.889737	860/10000	12	0
UniValsudMG_2_bin.79	FingerMtnordMG_2	0.505	23.559	0	0	0	11252	0	0.005	0.004	0.004	0.004	0.003	0.877437	642/10000	5	0
BatPronordMG_2_bin.40	FingerMtsudMG_2	21.042	39.55	0	0	24	738267	95.8611	0.462	0.413	0.386	0.37	0.358	0.916406	1599/10000	15	0
BatPronordMG_2_bin.42	FingerMtsudMG_2	8.927	9.05	4	8	13	304423	99.2442	0.943	0.893	0.832	0.768	0.703	0.99413	8837/10000	4	0
ButProsudMG_2_bin.21	FingerMtsudMG_2	132.455	81.263	82	149	174	4588696	99.1726	0.973	0.967	0.961	0.957	0.953	0.996228	9237/10000	94	0
FingerMtnordMG_2_bin.101	FingerMtsudMG_2	14.171	34.033	0	6	12	429951	96.6023	0.718	0.669	0.629	0.592	0.554	0.950389	3435/10000	9	0
FingerMtnordMG_2_bin.102	FingerMtsudMG_2	0.228	3.09	0	0	0	5030	91.5502	0.021	0.017	0.015	0.013	0.012	0.869697	533/10000	6	0
FingerMtnordMG_2_bin.103	FingerMtsudMG_2	2.267	14.995	0	0	0	21775	91.9598	0.076	0.064	0.057	0.053	0.049	0.897867	1041/10000	11	0
FingerMtnordMG_2_bin.104	FingerMtsudMG_2	0.312	3.166	0	0	0	7442	91.468	0.058	0.039	0.027	0.021	0.016	0.882183	719/10000	5	0
FingerMtnordMG_2_bin.109	FingerMtsudMG_2	0.049	0.266	0	0	0	1286	89.5116	0.039	0.008	0.001	0	0	0.847147	307/10000	1	0
FingerMtnordMG_2_bin.118	FingerMtsudMG_2	20.595	16.421	13	19	26	545782	98.7734	0.925	0.916	0.908	0.9	0.892	0.987911	7746/10000	16	0
FingerMtnordMG_2_bin.120	FingerMtsudMG_2	2.055	25.125	0	0	0	38083	90.8285	0.08	0.045	0.034	0.031	0.029	0.880272	687/10000	2	0
FingerMtnordMG_2_bin.121	FingerMtsudMG_2	5.91	18.846	0	2	5	341893	98.2139	0.725	0.564	0.427	0.327	0.258	0.976904	6122/10000	3	0
FingerMtnordMG_2_bin.125	FingerMtsudMG_2	4.199	22.331	0	0	0	103575	93.248	0.193	0.171	0.156	0.145	0.136	0.897661	1036/10000	13	0
FingerMtnordMG_2_bin.130	FingerMtsudMG_2	1.486	5.564	0	0	1	40634	95.3774	0.337	0.229	0.163	0.12	0.09	0.911514	1429/10000	4	0
FingerMtnordMG_2_bin.137	FingerMtsudMG_2	17.872	40.309	0	5	22	512318	96.6173	0.628	0.583	0.55	0.524	0.5	0.941598	2826/10000	19	0
FingerMtnordMG_2_bin.15	FingerMtsudMG_2	10.562	14.136	5	10	14	299282	98.9086	0.883	0.862	0.84	0.813	0.779	0.991659	8387/10000	6	0
FingerMtnordMG_2_bin.17	FingerMtsudMG_2	0.371	4.427	0	0	0	15255	90.1904	0.025	0.018	0.015	0.014	0.013	0.817422	145/10000	6	2.47679e-155
FingerMtnordMG_2_bin.18	FingerMtsudMG_2	0.357	5.734	0	0	0	17970	90.2771	0.011	0.008	0.007	0.007	0.007	0.803843	102/10000	4	8.71366e-95
FingerMtnordMG_2_bin.19	FingerMtsudMG_2	25.727	13.889	21	25	30	627982	99.8212	0.968	0.965	0.964	0.963	0.962	0.997495	9487/10000	22	0
FingerMtnordMG_2_bin.22	FingerMtsudMG_2	0.072	2.216	0	0	0	2724	90.5806	0.011	0.004	0.002	0.002	0.002	0.815215	137/10000	2	1.38024e-143
FingerMtnordMG_2_bin.24	FingerMtsudMG_2	0.179	1.259	0	0	0	7120	91.8026	0.119	0.03	0.007	0.003	0.001	0.900499	1107/10000	1	0
FingerMtnordMG_2_bin.29	FingerMtsudMG_2	0.489	3.529	0	0	0	13926	92.0198	0.075	0.054	0.043	0.035	0.03	0.886041	788/10000	6	0
FingerMtnordMG_2_bin.3	FingerMtsudMG_2	0.021	0.779	0	0	0	554	0	0.005	0.002	0.001	0.001	0.001	0.809766	119/10000	2	6.30989e-118
FingerMtnordMG_2_bin.31	FingerMtsudMG_2	0.222	4.144	0	0	0	5109	90.477	0.022	0.014	0.01	0.008	0.007	0.869228	527/10000	4	0
FingerMtnordMG_2_bin.33	FingerMtsudMG_2	2.029	9.452	0	0	0	59622	93.0956	0.174	0.143	0.122	0.107	0.095	0.888285	831/10000	12	0
FingerMtnordMG_2_bin.35	FingerMtsudMG_2	0.003	0.181	0	0	0	135	0	0.002	0	0	0	0	0.775502	48/10000	1	6.90983e-31
FingerMtnordMG_2_bin.38	FingerMtsudMG_2	5.966	69.41	0	0	0	149400	92.8048	0.147	0.114	0.096	0.082	0.072	0.875303	610/10000	13	0
FingerMtnordMG_2_bin.41	FingerMtsudMG_2	2.111	17.092	0	0	0	40378	91.4553	0.085	0.067	0.057	0.051	0.046	0.871074	551/10000	10	0
FingerMtnordMG_2_bin.53	FingerMtsudMG_2	1.724	6.997	0	0	1	53688	94.7691	0.282	0.214	0.169	0.135	0.11	0.915552	1568/10000	6	0
FingerMtnordMG_2_bin.57	FingerMtsudMG_2	4.608	10.433	1	3	5	139044	99.3105	0.882	0.736	0.567	0.414	0.293	0.991433	8347/10000	3	0
FingerMtnordMG_2_bin.58	FingerMtsudMG_2	3.245	4.207	0	2	5	54486	96.9193	0.616	0.53	0.452	0.378	0.308	0.926989	2035/10000	6	0
FingerMtnordMG_2_bin.61	FingerMtsudMG_2	1.456	15.569	0	0	1	36279	95.4489	0.446	0.245	0.124	0.062	0.033	0.931669	2262/10000	2	0
FingerMtnordMG_2_bin.63	FingerMtsudMG_2	0.13	8.056	0	0	0	5867	89.835	0.007	0.004	0.003	0.003	0.002	0.857582	397/10000	5	0
FingerMtnordMG_2_bin.65	FingerMtsudMG_2	0.048	0.805	0	0	0	1960	90.4609	0.02	0.01	0.005	0.003	0.002	0.861978	442/10000	3	0
FingerMtnordMG_2_bin.66	FingerMtsudMG_2	0.269	2.916	0	0	0	12377	91.9238	0.096	0.052	0.029	0.017	0.01	0.887463	815/10000	3	0
FingerMtnordMG_2_bin.70	FingerMtsudMG_2	2.951	4.968	0	2	4	95188	96.9057	0.598	0.501	0.409	0.324	0.249	0.925512	1968/10000	6	0
FingerMtnordMG_2_bin.85	FingerMtsudMG_2	0.093	2.13	0	0	0	4885	91.0464	0.036	0.018	0.009	0.005	0.003	0.874545	599/10000	3	0
FingerMtnordMG_2_bin.86	FingerMtsudMG_2	0.218	5.069	0	0	0	9661	91.5638	0.01	0.007	0.006	0.006	0.005	0.832528	213/10000	3	3.89543e-262
FingerMtnordMG_2_bin.89	FingerMtsudMG_2	0.244	5.561	0	0	0	5121	91.7103	0.02	0.015	0.012	0.01	0.009	0.856541	387/10000	4	0
FingerMtnordMG_2_bin.9	FingerMtsudMG_2	0.173	0.774	0	0	0	7691	91.6745	0.081	0.042	0.022	0.012	0.007	0.881594	709/10000	3	0
FingerMtnordMG_2_bin.94	FingerMtsudMG_2	0.621	4.79	0	0	0	14319	92.443	0.118	0.08	0.059	0.046	0.037	0.89708	1022/10000	4	0
FingerMtnordMG_2_bin.96	FingerMtsudMG_2	0.674	5.976	0	0	0	13156	91.4212	0.06	0.043	0.034	0.029	0.025	0.887099	808/10000	6	0
FingerMtnordMG_2_bin.98	FingerMtsudMG_2	4.14	3.68	2	4	6	75028	99.6493	0.937	0.834	0.689	0.525	0.373	0.996253	9242/10000	4	0
FingerMtnordMG_2_bin.99	FingerMtsudMG_2	5.38	8.876	3	5	7	184554	99.2523	0.937	0.892	0.81	0.695	0.562	0.992163	8477/10000	5	0
FingerMtsudMG_2_bin.2	FingerMtsudMG_2	31.127	20.026	17	25	42	1602194	99.9558	1	0.999	0.999	0.997	0.995	0.99999	9998/10000	17	0
FingerMtsudMG_2_bin.24	FingerMtsudMG_2	19.528	18.898	14	18	22	437111	99.9937	1	1	0.999	0.999	0.998	1	10000/10000	16	0
FingerMtsudMG_2_bin.25	FingerMtsudMG_2	30.292	14.249	25	29	35	621637	99.9935	1	1	0.999	0.999	0.998	1	10000/10000	24	0
FingerMtsudMG_2_bin.3	FingerMtsudMG_2	48.4	19.469	41	47	54	1628075	99.9993	1	1	1	1	1	1	10000/10000	40	0
FingerMtsudMG_2_bin.49	FingerMtsudMG_2	25.539	18.272	19	24	29	741230	99.9968	1	1	0.999	0.999	0.998	0.999995	9999/10000	20	0
FingerMtsudMG_2_bin.5	FingerMtsudMG_2	11.063	11.102	8	10	13	233383	99.9976	1	0.998	0.993	0.982	0.959	0.999995	9999/10000	9	0
FingerMtsudMG_2_bin.50	FingerMtsudMG_2	14.44	32.023	8	11	14	268674	99.9893	1	0.998	0.993	0.98	0.956	1	10000/10000	9	0
FingerMtsudMG_2_bin.66	FingerMtsudMG_2	14.022	11.206	8	11	16	260232	99.9906	1	0.997	0.99	0.976	0.95	0.999995	9999/10000	8	0
FingerMtsudMG_2_bin.74	FingerMtsudMG_2	10.735	12.362	7	9	12	253151	99.9838	1	0.996	0.985	0.961	0.917	0.999976	9995/10000	8	0
FingerMtsudMG_2_bin.9	FingerMtsudMG_2	54.394	47.475	37	47	59	3149724	99.9896	1	1	1	0.999	0.999	1	10000/10000	35	0
KnobheadnordMG_2_bin.23	FingerMtsudMG_2	9.92	38.08	0	0	0	294493	93.3023	0.244	0.206	0.189	0.179	0.171	0.923428	1877/10000	16	0
KnobheadnordMG_2_bin.34	FingerMtsudMG_2	12.889	19.474	4	9	14	352083	96.902	0.843	0.815	0.788	0.761	0.729	0.967078	4951/10000	9	0
KnobheadnordMG_2_bin.72	FingerMtsudMG_2	6.574	13.818	0	3	11	153013	96.393	0.599	0.547	0.506	0.47	0.435	0.93626	2508/10000	10	0
KnobheadsudMG_2_bin.2	FingerMtsudMG_2	3.836	18.294	0	1	3	96239	96.5674	0.516	0.381	0.281	0.207	0.154	0.933759	2371/10000	3	0
KnobheadsudMG_2_bin.4	FingerMtsudMG_2	377.549	229.746	306	431	493	7863583	95.5236	0.911	0.907	0.905	0.903	0.902	0.963468	4577/10000	381	0
KnobheadsudMG_2_bin.48	FingerMtsudMG_2	1.132	7.705	0	0	0	31999	91.2466	0.071	0.058	0.05	0.045	0.041	0.867137	501/10000	11	0
KnobheadsudMG_2_bin.80	FingerMtsudMG_2	29.005	41.949	4	18	44	1270246	97.4955	0.857	0.821	0.789	0.76	0.733	0.978724	6366/10000	9	0
LinTernordMG_2_bin.2	FingerMtsudMG_2	8.816	21.461	3	7	10	272198	97.4792	0.853	0.82	0.785	0.741	0.681	0.978504	6336/10000	7	0
LinTernordMG_2_bin.21	FingerMtsudMG_2	6.395	23.984	0	0	4	369437	95.492	0.43	0.346	0.295	0.257	0.228	0.933853	2376/10000	8	0
LinTernordMG_2_bin.22	FingerMtsudMG_2	12.892	22.409	6	12	16	387121	98.7923	0.877	0.848	0.824	0.803	0.783	0.98966	8039/10000	10	0
LinTernordMG_2_bin.4	FingerMtsudMG_2	0.997	8.463	0	0	0	28386	91.8699	0.056	0.046	0.04	0.035	0.032	0.872626	572/10000	8	0
LinTernordMG_2_bin.44	FingerMtsudMG_2	1.655	8.925	0	1	2	44579	97.0452	0.554	0.276	0.128	0.062	0.034	0.968426	5098/10000	2	0
LinTernordMG_2_bin.8	FingerMtsudMG_2	5.535	24.102	0	1	3	174997	97.1957	0.594	0.398	0.275	0.201	0.156	0.96166	4400/10000	2	0
MtNewZealnordMG_2_bin.1	FingerMtsudMG_2	7.116	6.2	4	7	10	155105	99.1051	0.877	0.851	0.817	0.771	0.709	0.991698	8394/10000	6	0
MtNewZealnordMG_2_bin.10	FingerMtsudMG_2	1.561	4.234	0	1	2	58164	97.059	0.549	0.324	0.18	0.104	0.065	0.963996	4630/10000	2	0
MtNewZealnordMG_2_bin.105	FingerMtsudMG_2	11.753	74.767	0	1	9	277875	96.3319	0.52	0.476	0.441	0.408	0.377	0.914169	1519/10000	14	0
MtNewZealnordMG_2_bin.16	FingerMtsudMG_2	15.438	21.011	8	11	15	439373	99.8095	0.972	0.966	0.959	0.947	0.927	0.998265	9642/10000	9	0
MtNewZealnordMG_2_bin.19	FingerMtsudMG_2	49.039	53.789	39	47	54	1172742	98.1784	0.928	0.926	0.925	0.924	0.922	0.9857	7390/10000	40	0
MtNewZealnordMG_2_bin.25	FingerMtsudMG_2	14.584	23.065	7	13	17	488793	98.3172	0.903	0.886	0.868	0.848	0.825	0.990312	8151/10000	8	0
MtNewZealnordMG_2_bin.27	FingerMtsudMG_2	2.43	19.955	0	0	0	92142	94.5757	0.222	0.161	0.121	0.094	0.077	0.923638	1886/10000	3	0
MtNewZealnordMG_2_bin.7	FingerMtsudMG_2	11.349	7.972	7	11	15	332224	99.2441	0.931	0.918	0.903	0.886	0.863	0.992794	8591/10000	8	0
MtNewZealnordMG_2_bin.74	FingerMtsudMG_2	2.678	2.17	1	2	4	112701	98.7698	0.852	0.671	0.471	0.3	0.178	0.986706	7550/10000	2	0
MtNewZealnordMG_2_bin.9	FingerMtsudMG_2	8.347	18.309	5	8	11	131453	99.2631	0.899	0.888	0.87	0.84	0.791	0.990824	8240/10000	7	0
PudButnordMG_2_bin.11	FingerMtsudMG_2	0.057	2.789	0	0	0	1953	0	0.003	0.002	0.002	0.002	0.002	0.786199	64/10000	7	6.29219e-48
PudButnordMG_2_bin.13	FingerMtsudMG_2	0.036	4.28	0	0	0	1134	0	0	0	0	0	0	0.786779	65/10000	6	4.69098e-49
PudButnordMG_2_bin.2	FingerMtsudMG_2	0.461	6.722	0	0	0	9256	91.3349	0.03	0.022	0.018	0.016	0.014	0.874545	599/10000	5	0
PudButnordMG_2_bin.22	FingerMtsudMG_2	2.164	4.861	0	0	3	116062	95.5942	0.398	0.333	0.277	0.23	0.187	0.915552	1568/10000	6	0
PudButnordMG_2_bin.3	FingerMtsudMG_2	3.682	15.583	0	0	1	210471	94.3674	0.264	0.223	0.194	0.172	0.152	0.924425	1920/10000	6	0
PudButnordMG_2_bin.36	FingerMtsudMG_2	0.001	0.058	0	0	0	43	0	0.001	0	0	0	0	0.836264	234/10000	4	3.12387e-297
PudButnordMG_2_bin.42	FingerMtsudMG_2	0.012	0.224	0	0	0	444	0	0.005	0.003	0.002	0.001	0.001	0.790094	71/10000	2	5.88277e-56
PudButnordMG_2_bin.5	FingerMtsudMG_2	3.67	13.825	0	0	0	51124	93.2732	0.185	0.16	0.145	0.132	0.123	0.905273	1237/10000	16	0
PudButnordMG_2_bin.53	FingerMtsudMG_2	0.057	0.523	0	0	0	1825	90.3947	0.03	0.012	0.005	0.003	0.002	0.872988	577/10000	2	0
PudButnordMG_2_bin.56	FingerMtsudMG_2	0.169	0.906	0	0	0	7294	91.6799	0.074	0.039	0.021	0.012	0.007	0.87789	649/10000	3	0
PudButnordMG_2_bin.59	FingerMtsudMG_2	0	0.018	0	0	0	6	0	0	0	0	0	0	0.799903	92/10000	5	9.67937e-82
PudButnordMG_2_bin.60	FingerMtsudMG_2	0.009	0.204	0	0	0	348	0	0.003	0.002	0.001	0.001	0	0.772295	44/10000	1	5.83684e-27
PudButnordMG_2_bin.67	FingerMtsudMG_2	0.062	5.013	0	0	0	1677	0	0.002	0.001	0.001	0.001	0.001	0.852798	353/10000	4	0
PudButnordMG_2_bin.81	FingerMtsudMG_2	1.36	26.841	0	0	0	35340	91.2565	0.058	0.045	0.038	0.034	0.031	0.882299	721/10000	5	0
PudButnordMG_2_bin.85	FingerMtsudMG_2	3.412	14.292	0	0	1	104546	94.7063	0.271	0.228	0.199	0.177	0.16	0.907583	1305/10000	7	0
PudButnordMG_2_bin.88	FingerMtsudMG_2	1.884	6.245	0	0	0	46173	94.0564	0.211	0.173	0.148	0.129	0.114	0.890179	869/10000	10	0
PudButnordMG_2_bin.90	FingerMtsudMG_2	8.666	22.11	1	6	10	450312	97.4842	0.778	0.739	0.701	0.655	0.597	0.973056	5635/10000	6	0
PudButnordMG_2_bin.95	FingerMtsudMG_2	0.305	2.654	0	0	0	15087	92.4085	0.115	0.062	0.034	0.019	0.011	0.884902	767/10000	3	0
PudButsudMG_2_bin.15	FingerMtsudMG_2	2.808	9.176	0	0	2	76449	95.8822	0.436	0.27	0.201	0.166	0.144	0.945068	3053/10000	1	0
PudButsudMG_2_bin.38	FingerMtsudMG_2	7.892	15.795	1	7	12	250601	97.2632	0.805	0.749	0.697	0.645	0.596	0.961598	4394/10000	5	0
PudButsudMG_2_bin.44	FingerMtsudMG_2	23.737	40.515	1	3	28	835095	98.6315	0.817	0.652	0.527	0.452	0.406	0.982173	6854/10000	2	0
PudButsudMG_2_bin.46	FingerMtsudMG_2	1.162	5.2	0	0	1	31425	94.8309	0.282	0.187	0.131	0.095	0.071	0.903351	1183/10000	4	0
PudButsudMG_2_bin.57	FingerMtsudMG_2	6.854	11.463	3	6	8	164660	98.0211	0.915	0.878	0.818	0.731	0.623	0.982661	6926/10000	5	0
PudButsudMG_2_bin.59	FingerMtsudMG_2	28.812	47.626	3	15	41	1733374	98.2869	0.901	0.828	0.773	0.731	0.697	0.987048	7605/10000	5	0
PudButsudMG_2_bin.62	FingerMtsudMG_2	52.349	32.328	44	56	65	1859888	98.7775	0.923	0.913	0.905	0.898	0.891	0.991308	8325/10000	48	0
PudButsudMG_2_bin.78	FingerMtsudMG_2	3.567	24.569	0	0	0	88629	92.4629	0.116	0.101	0.091	0.084	0.078	0.889836	862/10000	19	0
RickerHillsnord_2_bin.11	FingerMtsudMG_2	1.923	2.396	0	1	3	53298	97.4302	0.701	0.459	0.279	0.169	0.104	0.969038	5166/10000	2	0
RickerHillsnord_2_bin.17	FingerMtsudMG_2	0.464	11.693	0	0	0	9911	91.3043	0.048	0.033	0.025	0.019	0.016	0.887411	814/10000	5	0
RickerHillsnord_2_bin.19	FingerMtsudMG_2	1.942	15.593	0	0	2	38153	94.9057	0.341	0.26	0.206	0.164	0.13	0.911937	1443/10000	6	0
RickerHillsnord_2_bin.23	FingerMtsudMG_2	1.697	20.272	0	0	0	54214	92.5785	0.051	0.042	0.037	0.034	0.032	0.880211	686/10000	9	0
RickerHillsnord_2_bin.25	FingerMtsudMG_2	1.067	10.178	0	0	0	37035	92.6817	0.15	0.113	0.09	0.073	0.06	0.887825	822/10000	6	0
RickerHillsnord_2_bin.26	FingerMtsudMG_2	1.28	9.058	0	0	0	29674	92.1038	0.106	0.082	0.066	0.056	0.049	0.901722	1139/10000	8	0
RickerHillsnord_2_bin.29	FingerMtsudMG_2	1.812	13.001	0	0	0	29011	92.8375	0.093	0.081	0.072	0.065	0.06	0.901076	1122/10000	9	0
RickerHillsnord_2_bin.30	FingerMtsudMG_2	6.881	14.957	1	3	8	153545	97.9538	0.788	0.636	0.515	0.43	0.374	0.974089	5762/10000	2	0
RickerHillsnord_2_bin.32	FingerMtsudMG_2	0.898	7.097	0	0	0	24934	92.173	0.095	0.075	0.063	0.055	0.049	0.903096	1176/10000	7	0
RickerHillsnord_2_bin.34	FingerMtsudMG_2	7.781	34.186	0	0	2	467218	94.7629	0.348	0.256	0.211	0.185	0.167	0.937558	2582/10000	4	0
RickerHillsnord_2_bin.36	FingerMtsudMG_2	12.544	24.017	1	11	16	496246	98.3644	0.752	0.739	0.726	0.713	0.699	0.980627	6631/10000	11	0
RickerHillsnord_2_bin.37	FingerMtsudMG_2	1.596	13.037	0	0	0	39628	92.3687	0.09	0.072	0.06	0.052	0.045	0.898962	1068/10000	7	0
RickerHillsnord_2_bin.48	FingerMtsudMG_2	12.062	14.744	2	8	19	306448	98.6048	0.918	0.82	0.733	0.664	0.613	0.988814	7896/10000	3	0
RickerHillsnord_2_bin.50	FingerMtsudMG_2	3.062	5.811	0	2	4	63424	98.3883	0.745	0.598	0.444	0.313	0.211	0.98011	6558/10000	2	0
RickerHillsnord_2_bin.54	FingerMtsudMG_2	3.518	14.326	0	1	3	122650	96.8594	0.684	0.493	0.338	0.232	0.164	0.949053	3335/10000	2	0
RickerHillsnord_2_bin.55	FingerMtsudMG_2	2.743	16.666	0	0	0	82243	92.8742	0.111	0.094	0.082	0.073	0.066	0.900846	1116/10000	9	0
RickerHillsnord_2_bin.63	FingerMtsudMG_2	0.022	0.818	0	0	0	867	0	0.006	0.004	0.003	0.002	0.001	0.788472	68/10000	1	1.77457e-52
RickerHillsnord_2_bin.8	FingerMtsudMG_2	1.046	1.92	0	0	1	25649	95.1415	0.412	0.227	0.133	0.088	0.061	0.923848	1895/10000	2	0
RicNunsandstonMG_3_bin.1	FingerMtsudMG_2	2.329	14.117	0	0	0	36113	94.9449	0.093	0.083	0.075	0.068	0.063	0.905238	1236/10000	7	0
RicNunsandstonMG_3_bin.11	FingerMtsudMG_2	0.126	0.947	0	0	0	5191	91.0099	0.062	0.03	0.015	0.007	0.004	0.864328	468/10000	3	0
RicNunsandstonMG_3_bin.12	FingerMtsudMG_2	30.918	29.79	12	24	46	759917	99.3862	0.963	0.951	0.94	0.93	0.917	0.995602	9116/10000	12	0
RicNunsandstonMG_3_bin.13	FingerMtsudMG_2	11.156	75.01	0	4	10	100472	96.8854	0.654	0.598	0.551	0.506	0.465	0.918539	1679/10000	14	0
RicNunsandstonMG_3_bin.19	FingerMtsudMG_2	3.216	36.092	0	0	0	85293	91.3517	0.067	0.05	0.043	0.038	0.036	0.870161	539/10000	9	0
RicNunsandstonMG_3_bin.21	FingerMtsudMG_2	7.597	60.847	0	0	0	184389	91.4475	0.059	0.053	0.05	0.048	0.046	0.880455	690/10000	14	0
RicNunsandstonMG_3_bin.25	FingerMtsudMG_2	5.203	8.237	0	1	9	151586	96.3334	0.541	0.489	0.447	0.41	0.376	0.932965	2329/10000	8	0
RicNunsandstonMG_3_bin.26	FingerMtsudMG_2	0.278	4.604	0	0	0	3818	0	0.026	0.02	0.017	0.016	0.014	0.867219	502/10000	4	0
RicNunsandstonMG_3_bin.35	FingerMtsudMG_2	39.047	35.679	0	36	71	1377311	95.408	0.725	0.697	0.685	0.677	0.67	0.932137	2286/10000	71	0
RicNunsandstonMG_3_bin.43	FingerMtsudMG_2	1.538	8.426	0	0	0	32594	92.9572	0.158	0.123	0.1	0.084	0.072	0.90863	1337/10000	7	0
RicNunsandstonMG_3_bin.47	FingerMtsudMG_2	0.051	0.825	0	0	0	850	89.1967	0.012	0.006	0.004	0.003	0.003	0.866889	498/10000	4	0
RicNunsandstonMG_3_bin.48	FingerMtsudMG_2	6.421	17.211	1	4	7	262639	96.5571	0.751	0.671	0.595	0.515	0.433	0.954404	3753/10000	5	0
RicNunsandstonMG_3_bin.58	FingerMtsudMG_2	8.43	10.784	0	6	12	171150	97.0773	0.723	0.684	0.645	0.604	0.563	0.950678	3457/10000	10	0
RicNunsandstonMG_3_bin.62	FingerMtsudMG_2	0.387	4.742	0	0	0	9463	91.2218	0.021	0.017	0.016	0.014	0.012	0.841082	264/10000	10	0
RicNunsandstonMG_3_bin.63	FingerMtsudMG_2	3.781	36.354	0	0	0	78914	91.6318	0.088	0.074	0.065	0.058	0.054	0.872844	575/10000	12	0
RicNunsandstonMG_3_bin.67	FingerMtsudMG_2	0.02	0.195	0	0	0	761	89.6428	0.015	0.004	0.001	0	0	0.811042	123/10000	1	1.56646e-123
RicNunsandstonMG_3_bin.7	FingerMtsudMG_2	0.188	7.255	0	0	0	5419	91.2504	0.105	0.023	0.005	0.001	0	0.893919	949/10000	1	0
RicNunsandstonMG_3_bin.70	FingerMtsudMG_2	7.125	11.777	2	4	7	175707	98.0778	0.889	0.821	0.722	0.606	0.489	0.980866	6665/10000	4	0
RicNunsandstonMG_3_bin.74	FingerMtsudMG_2	4.256	8.407	2	3	5	112580	99.4961	0.917	0.774	0.598	0.433	0.3	0.993845	8784/10000	3	0
RicNunsandstonMG_3_bin.78	FingerMtsudMG_2	6.119	17.224	0	3	7	269201	96.7132	0.68	0.6	0.526	0.453	0.382	0.950362	3433/10000	6	0
RicNunsandstonMG_3_bin.85	FingerMtsudMG_2	85.651	27.889	79	90	100	3240048	99.7939	0.968	0.965	0.964	0.963	0.962	0.998256	9640/10000	78	0
RicNunsandstonMG_3_bin.86	FingerMtsudMG_2	18.196	133.864	0	0	0	434538	90.8449	0.092	0.06	0.051	0.047	0.046	0.885121	771/10000	6	0
RicNunsandstonMG_3_bin.88	FingerMtsudMG_2	153.383	33.031	137	156	173	5851416	99.9694	0.991	0.991	0.991	0.991	0.991	0.999584	9913/10000	133	0
RicNunsandstonMG_3_bin.89	FingerMtsudMG_2	0.657	14.191	0	0	0	22014	91.4147	0.023	0.018	0.016	0.014	0.012	0.873204	580/10000	8	0
RicNunsandstonMG_3_bin.90	FingerMtsudMG_2	0.009	0.39	0	0	0	196	0	0.001	0.001	0.001	0.001	0.001	0.757115	29/10000	9	9.20844e-14
RicNunsandstonMG_3_bin.91	FingerMtsudMG_2	0.287	1.6	0	0	0	12513	92.4228	0.119	0.065	0.035	0.02	0.011	0.891901	905/10000	3	0
RicNunsandstonMG_3_bin.93	FingerMtsudMG_2	1.084	4.767	0	0	0	39420	93.2816	0.23	0.143	0.105	0.084	0.069	0.925423	1964/10000	2	0
RicNunsandstonMG_3_bin.94	FingerMtsudMG_2	0.955	6.649	0	0	0	24252	92.156	0.101	0.079	0.066	0.056	0.049	0.901381	1130/10000	8	0
RicNunsandstonMG_3_bin.95	FingerMtsudMG_2	0.548	4.44	0	0	0	10211	90.7741	0.037	0.031	0.028	0.025	0.023	0.806739	110/10000	76	1.56088e-105
RicNunsandstonMG_4_bin.33	FingerMtsudMG_2	11.822	8.589	6	12	16	410741	98.3607	0.941	0.897	0.86	0.829	0.802	0.99158	8373/10000	8	0
RicNunsandstonMG_4_bin.58	FingerMtsudMG_2	5.636	6.134	1	5	8	167558	98.5353	0.79	0.747	0.702	0.643	0.568	0.984466	7198/10000	6	0
RicNunsandstonMG_4_bin.63	FingerMtsudMG_2	0.918	11.032	0	0	0	18639	93.3727	0.199	0.127	0.088	0.064	0.049	0.89472	967/10000	5	0
RicNunsandstonMG_4_bin.75	FingerMtsudMG_2	9.302	5.076	6	9	12	160205	99.109	0.941	0.926	0.909	0.883	0.845	0.993537	8727/10000	8	0
RicNunsandstonMG_4_bin.86	FingerMtsudMG_2	1.331	17.371	0	0	1	24631	95.0981	0.388	0.178	0.083	0.047	0.032	0.945098	3055/10000	1	0
RicNunsandstonMG_4_bin.87	FingerMtsudMG_2	12.848	15.071	8	11	15	343740	99.7997	0.995	0.991	0.983	0.968	0.943	0.999223	9838/10000	8	0
RicNunsandstonMG_4_bin.94	FingerMtsudMG_2	6.622	10.931	2	6	9	347558	98.0607	0.806	0.764	0.719	0.667	0.604	0.981402	6742/10000	6	0
SiePeanordMG_2_bin.15	FingerMtsudMG_2	3.953	17.512	0	0	2	165885	95.3174	0.348	0.279	0.231	0.194	0.165	0.915441	1564/10000	7	0
SiePeanordMG_2_bin.16	FingerMtsudMG_2	0.035	4.403	0	0	0	1024	0	0.001	0	0	0	0	0.804217	103/10000	3	4.08694e-96
SiePeanordMG_2_bin.21	FingerMtsudMG_2	1.421	15.819	0	1	1	34721	96.7166	0.506	0.234	0.1	0.044	0.021	0.962822	4513/10000	1	0
SiePeanordMG_2_bin.24	FingerMtsudMG_2	0.004	0.182	0	0	0	110	0	0.001	0	0	0	0	0.822939	167/10000	4	1.32443e-188
SiePeanordMG_2_bin.38	FingerMtsudMG_2	0.015	0.497	0	0	0	432	89.8092	0.007	0.002	0.001	0	0	0.824096	172/10000	2	2.37655e-196
SiePeanordMG_2_bin.41	FingerMtsudMG_2	4.891	29.526	0	0	0	149968	93.7643	0.173	0.151	0.137	0.126	0.117	0.916868	1616/10000	8	0
SiePeanordMG_2_bin.44	FingerMtsudMG_2	39.538	31.657	30	40	48	1007991	98.4187	0.933	0.913	0.899	0.889	0.882	0.99185	8421/10000	32	0
SiePeanordMG_2_bin.53	FingerMtsudMG_2	30.814	24.009	19	31	40	831951	97.1972	0.937	0.899	0.874	0.858	0.847	0.987091	7612/10000	20	0
SiePeanordMG_2_bin.56	FingerMtsudMG_2	6.571	7.159	4	6	8	173942	99.4943	0.962	0.931	0.873	0.783	0.671	0.996181	9228/10000	5	0
SiePeanordMG_2_bin.60	FingerMtsudMG_2	18.07	25.56	11	16	21	519486	99.0901	0.944	0.927	0.914	0.902	0.891	0.994253	8860/10000	13	0
SiePeanordMG_2_bin.70	FingerMtsudMG_2	2.478	17.444	0	0	0	68602	94.334	0.118	0.096	0.083	0.075	0.068	0.899993	1094/10000	6	0
SiePeanordMG_2_bin.71	FingerMtsudMG_2	0.011	0.134	0	0	0	180	0	0.008	0.002	0.001	0	0	0.827593	188/10000	2	1.46816e-221
SiePeanordMG_2_bin.9	FingerMtsudMG_2	1.732	7.631	0	0	1	58470	94.8538	0.29	0.212	0.162	0.128	0.104	0.91703	1622/10000	5	0
SiePeasudMG_2_bin.1	FingerMtsudMG_2	0.498	5.642	0	0	0	11989	91.3263	0.029	0.022	0.018	0.016	0.015	0.876649	630/10000	8	0
SiePeasudMG_2_bin.102	FingerMtsudMG_2	0.364	14.909	0	0	0	8666	90.6116	0.017	0.01	0.007	0.006	0.005	0.861511	437/10000	4	0
SiePeasudMG_2_bin.103	FingerMtsudMG_2	0.103	1.819	0	0	0	2010	90.3369	0.017	0.011	0.008	0.006	0.005	0.869929	536/10000	6	0
SiePeasudMG_2_bin.105	FingerMtsudMG_2	0.122	3.767	0	0	0	4484	0	0.004	0.003	0.003	0.003	0.002	0.839537	254/10000	4	0
SiePeasudMG_2_bin.106	FingerMtsudMG_2	0.466	6.052	0	0	0	11989	91.1576	0.027	0.021	0.017	0.015	0.013	0.860849	430/10000	7	0
SiePeasudMG_2_bin.11	FingerMtsudMG_2	0.268	3.628	0	0	0	3353	91.1504	0.021	0.016	0.014	0.012	0.011	0.878147	653/10000	7	0
SiePeasudMG_2_bin.112	FingerMtsudMG_2	0.012	1.182	0	0	0	395	0	0.002	0.001	0	0	0	0.814931	136/10000	6	3.92684e-142
SiePeasudMG_2_bin.114	FingerMtsudMG_2	0.011	0.516	0	0	0	313	88.955	0.004	0.001	0	0	0	0.809766	119/10000	2	6.30989e-118
SiePeasudMG_2_bin.118	FingerMtsudMG_2	0.578	6.878	0	0	0	15229	91.2095	0.043	0.032	0.027	0.023	0.02	0.878275	655/10000	5	0
SiePeasudMG_2_bin.12	FingerMtsudMG_2	0.007	0.618	0	0	0	198	0	0.001	0	0	0	0	0.815215	137/10000	2	1.38024e-143
SiePeasudMG_2_bin.121	FingerMtsudMG_2	0.001	0.048	0	0	0	42	0	0.001	0	0	0	0	0.767872	39/10000	2	2.83942e-22
SiePeasudMG_2_bin.16	FingerMtsudMG_2	0.103	3.365	0	0	0	2159	90.1477	0.008	0.005	0.004	0.003	0.003	0.846884	305/10000	9	0
SiePeasudMG_2_bin.2	FingerMtsudMG_2	1.676	22.447	0	0	0	34154	91.3121	0.071	0.047	0.038	0.033	0.03	0.894587	964/10000	6	0
SiePeasudMG_2_bin.22	FingerMtsudMG_2	0.009	0.179	0	0	0	373	0	0.004	0.002	0.001	0.001	0	0.785011	62/10000	1	1.08018e-45
SiePeasudMG_2_bin.25	FingerMtsudMG_2	0.046	1.979	0	0	0	871	0	0.002	0.001	0.001	0.001	0.001	0.801922	97/10000	6	3.30532e-88
SiePeasudMG_2_bin.29	FingerMtsudMG_2	0.001	0.027	0	0	0	18	0	0.001	0	0	0	0	0.785609	63/10000	3	8.30961e-47
SiePeasudMG_2_bin.3	FingerMtsudMG_2	0.411	5.417	0	0	0	8963	90.884	0.026	0.02	0.017	0.014	0.013	0.872262	567/10000	7	0
SiePeasudMG_2_bin.31	FingerMtsudMG_2	0.613	6.526	0	0	0	12368	91.3604	0.057	0.043	0.035	0.029	0.025	0.889836	862/10000	6	0
SiePeasudMG_2_bin.35	FingerMtsudMG_2	0.22	2.632	0	0	0	6073	90.5013	0.03	0.021	0.016	0.014	0.011	0.891096	888/10000	6	0
SiePeasudMG_2_bin.36	FingerMtsudMG_2	0.003	0.08	0	0	0	93	0	0.002	0.001	0	0	0	0.766923	38/10000	2	2.28447e-21
SiePeasudMG_2_bin.38	FingerMtsudMG_2	0.664	11.326	0	0	0	13794	91.0327	0.031	0.023	0.02	0.017	0.015	0.871672	559/10000	7	0
SiePeasudMG_2_bin.40	FingerMtsudMG_2	0.508	2.547	0	0	0	28207	92.2942	0.104	0.075	0.058	0.045	0.036	0.884792	765/10000	5	0
SiePeasudMG_2_bin.41	FingerMtsudMG_2	0.003	0.071	0	0	0	82	0	0.003	0	0	0	0	0.817422	145/10000	6	2.47679e-155
SiePeasudMG_2_bin.44	FingerMtsudMG_2	0.152	3.735	0	0	0	3725	90.2929	0.012	0.007	0.005	0.004	0.003	0.866971	499/10000	4	0
SiePeasudMG_2_bin.47	FingerMtsudMG_2	0.019	0.862	0	0	0	563	0	0.002	0.001	0.001	0.001	0.001	0.833991	221/10000	4	2.10972e-275
SiePeasudMG_2_bin.50	FingerMtsudMG_2	0.287	8.854	0	0	0	9968	90.6224	0.017	0.013	0.01	0.009	0.007	0.858498	406/10000	7	0
SiePeasudMG_2_bin.51	FingerMtsudMG_2	0.474	5.835	0	0	0	13661	90.8694	0.03	0.024	0.02	0.018	0.016	0.88189	714/10000	6	0
SiePeasudMG_2_bin.52	FingerMtsudMG_2	0.046	1.22	0	0	0	1259	0	0.005	0.004	0.003	0.003	0.002	0.851395	341/10000	6	0
SiePeasudMG_2_bin.55	FingerMtsudMG_2	0.042	5.146	0	0	0	991	0	0.003	0.001	0	0	0	0.779864	54/10000	1	4.82902e-37
SiePeasudMG_2_bin.56	FingerMtsudMG_2	0.049	2.135	0	0	0	1582	0	0.003	0.002	0.002	0.001	0.001	0.830429	202/10000	6	4.10704e-244
SiePeasudMG_2_bin.58	FingerMtsudMG_2	0.087	3.145	0	0	0	1504	90.0081	0.012	0.008	0.006	0.004	0.003	0.873774	588/10000	5	0
SiePeasudMG_2_bin.59	FingerMtsudMG_2	0.442	14.632	0	0	0	8888	91.2552	0.025	0.018	0.013	0.011	0.01	0.87916	669/10000	6	0
SiePeasudMG_2_bin.62	FingerMtsudMG_2	0.236	1.549	0	0	0	10058	91.4407	0.06	0.041	0.03	0.023	0.017	0.86537	480/10000	6	0
SiePeasudMG_2_bin.63	FingerMtsudMG_2	0.531	6.202	0	0	0	9490	90.5817	0.032	0.025	0.021	0.019	0.017	0.868595	519/10000	8	0
SiePeasudMG_2_bin.64	FingerMtsudMG_2	1.515	24.155	0	0	0	34308	91.0176	0.054	0.038	0.031	0.028	0.025	0.886679	800/10000	7	0
SiePeasudMG_2_bin.65	FingerMtsudMG_2	0.29	8.679	0	0	0	6163	90.7309	0.019	0.013	0.01	0.008	0.007	0.865797	485/10000	6	0
SiePeasudMG_2_bin.67	FingerMtsudMG_2	0.051	1.509	0	0	0	2217	89.9855	0.016	0.009	0.005	0.004	0.003	0.860466	426/10000	4	0
SiePeasudMG_2_bin.68	FingerMtsudMG_2	1.1	9.491	0	0	0	27876	92.0035	0.075	0.06	0.051	0.044	0.039	0.904535	1216/10000	8	0
SiePeasudMG_2_bin.69	FingerMtsudMG_2	0.054	2.892	0	0	0	2001	89.5687	0.015	0.006	0.003	0.002	0.001	0.856541	387/10000	4	0
SiePeasudMG_2_bin.7	FingerMtsudMG_2	0.045	1.509	0	0	0	720	0	0.002	0.002	0.001	0.001	0.001	0.852452	350/10000	6	0
SiePeasudMG_2_bin.71	FingerMtsudMG_2	0.376	13.565	0	0	0	9703	90.1805	0.012	0.007	0.006	0.005	0.005	0.87349	584/10000	5	0
SiePeasudMG_2_bin.73	FingerMtsudMG_2	2.447	4.499	0	0	4	121102	96.1513	0.458	0.391	0.331	0.276	0.226	0.917565	1642/10000	6	0
SiePeasudMG_2_bin.74	FingerMtsudMG_2	0	0.023	0	0	0	11	0	0	0	0	0	0	0.795068	81/10000	3	6.11289e-68
SiePeasudMG_2_bin.76	FingerMtsudMG_2	0.006	0.43	0	0	0	147	0	0.002	0	0	0	0	0.812278	127/10000	2	3.41094e-129
SiePeasudMG_2_bin.77	FingerMtsudMG_2	0.138	2.48	0	0	0	1134	0	0.018	0.009	0.006	0.005	0.004	0.877761	647/10000	4	0
SiePeasudMG_2_bin.79	FingerMtsudMG_2	0.001	0.041	0	0	0	38	0	0.001	0	0	0	0	0.767872	39/10000	1	2.83942e-22
SiePeasudMG_2_bin.8	FingerMtsudMG_2	0.116	1.613	0	0	0	1943	90.5674	0.013	0.009	0.008	0.007	0.006	0.854157	365/10000	7	0
SiePeasudMG_2_bin.82	FingerMtsudMG_2	0.062	2.434	0	0	0	2032	89.8068	0.004	0.003	0.002	0.002	0.002	0.852336	349/10000	6	0
SiePeasudMG_2_bin.83	FingerMtsudMG_2	0.002	0.05	0	0	0	51	0	0.002	0	0	0	0	0.823867	171/10000	5	8.51814e-195
SiePeasudMG_2_bin.84	FingerMtsudMG_2	0.001	0.04	0	0	0	53	0	0.001	0	0	0	0	0.780545	55/10000	1	4.25686e-38
SiePeasudMG_2_bin.85	FingerMtsudMG_2	0.818	7.765	0	0	0	14068	91.06	0.047	0.036	0.03	0.026	0.024	0.890952	885/10000	7	0
SiePeasudMG_2_bin.86	FingerMtsudMG_2	1.021	10.513	0	0	0	26038	91.7623	0.057	0.046	0.039	0.034	0.03	0.895722	990/10000	9	0
SiePeasudMG_2_bin.87	FingerMtsudMG_2	0.135	3.832	0	0	0	2341	0	0.011	0.009	0.007	0.006	0.005	0.873418	583/10000	6	0
SiePeasudMG_2_bin.89	FingerMtsudMG_2	0.105	2.906	0	0	0	1218	0	0.01	0.006	0.005	0.004	0.003	0.868675	520/10000	4	0
SiePeasudMG_2_bin.92	FingerMtsudMG_2	0.008	0.862	0	0	0	276	0	0.001	0.001	0	0	0	0.856646	388/10000	4	0
SiePeasudMG_2_bin.93	FingerMtsudMG_2	0.049	1.773	0	0	0	1393	88.9417	0.012	0.004	0.001	0.001	0.001	0.849324	324/10000	2	0
SiePeasudMG_2_bin.95	FingerMtsudMG_2	0.225	3.47	0	0	0	2474	0	0.018	0.012	0.01	0.008	0.007	0.857479	396/10000	6	0
TrioNunataknord_2_bin.100	FingerMtsudMG_2	0.159	6.918	0	0	0	989	0	0.001	0.001	0.001	0.001	0.001	0.823867	171/10000	4	8.51814e-195
TrioNunataknord_2_bin.101	FingerMtsudMG_2	0.23	12.374	0	0	0	5381	90.4003	0.018	0.013	0.01	0.007	0.006	0.87062	545/10000	5	0
TrioNunataknord_2_bin.117	FingerMtsudMG_2	0.042	5.172	0	0	0	1175	0	0.001	0	0	0	0	0.797339	86/10000	4	3.88117e-74
TrioNunataknord_2_bin.126	FingerMtsudMG_2	0.461	5.706	0	0	0	10941	90.8753	0.028	0.022	0.018	0.016	0.014	0.863078	454/10000	10	0
TrioNunataknord_2_bin.24	FingerMtsudMG_2	0.114	10.012	0	0	0	2892	0	0.003	0.002	0.001	0.001	0.001	0.822703	166/10000	6	4.60677e-187
TrioNunataknord_2_bin.27	FingerMtsudMG_2	0.075	1.068	0	0	0	853	89.5131	0.016	0.011	0.008	0.006	0.004	0.879223	670/10000	6	0
TrioNunataknord_2_bin.28	FingerMtsudMG_2	0.071	2.617	0	0	0	2355	89.6687	0.006	0.002	0.002	0.002	0.001	0.809766	119/10000	3	6.30989e-118
TrioNunataknord_2_bin.29	FingerMtsudMG_2	5.427	37.543	0	0	0	144482	92.4061	0.129	0.113	0.103	0.096	0.09	0.890032	866/10000	12	0
TrioNunataknord_2_bin.33	FingerMtsudMG_2	0.319	8.685	0	0	0	4417	0	0.01	0.008	0.007	0.006	0.005	0.856224	384/10000	5	0
TrioNunataknord_2_bin.44	FingerMtsudMG_2	0.679	9.589	0	0	0	21998	92.3844	0.123	0.089	0.067	0.052	0.041	0.882241	720/10000	7	0
TrioNunataknord_2_bin.46	FingerMtsudMG_2	0.365	15.345	0	0	0	7269	90.7749	0.019	0.013	0.01	0.008	0.007	0.869541	531/10000	6	0
TrioNunataknord_2_bin.58	FingerMtsudMG_2	0.231	3.689	0	0	0	4508	91.1859	0.034	0.024	0.017	0.013	0.01	0.895722	990/10000	6	0
TrioNunataknord_2_bin.6	FingerMtsudMG_2	0.837	8.203	0	0	0	23708	91.1379	0.041	0.033	0.028	0.025	0.022	0.892599	920/10000	7	0
TrioNunataknord_2_bin.63	FingerMtsudMG_2	0.878	13.365	0	0	0	28309	91.4704	0.042	0.034	0.029	0.026	0.023	0.863259	456/10000	8	0
TrioNunataknord_2_bin.66	FingerMtsudMG_2	0.034	0.848	0	0	0	702	0	0.005	0.003	0.003	0.002	0.002	0.869619	532/10000	4	0
TrioNunataknord_2_bin.69	FingerMtsudMG_2	0.01	0.235	0	0	0	458	0	0.004	0.002	0.001	0.001	0.001	0.777744	51/10000	1	6.30481e-34
TrioNunataknord_2_bin.79	FingerMtsudMG_2	1.994	33.617	0	0	0	26745	91.9058	0.042	0.035	0.032	0.029	0.026	0.887151	809/10000	8	0
TrioNunataknord_2_bin.83	FingerMtsudMG_2	0.279	13.496	0	0	0	6763	0	0.006	0.004	0.003	0.003	0.002	0.860273	424/10000	6	0
TrioNunataknord_2_bin.9	FingerMtsudMG_2	0.164	1.905	0	0	0	2340	90.5629	0.032	0.021	0.015	0.011	0.009	0.876383	626/10000	5	0
TrioNunataknord_2_bin.90	FingerMtsudMG_2	0.019	0.266	0	0	0	633	0	0.007	0.005	0.003	0.002	0.001	0.793153	77/10000	1	4.4449e-63
TrioNunataknord_2_bin.94	FingerMtsudMG_2	0.456	5.812	0	0	0	7892	91.5067	0.025	0.02	0.017	0.015	0.014	0.869385	529/10000	7	0
TrioNunataknord_2_bin.95	FingerMtsudMG_2	0.009	0.868	0	0	0	184	0	0.001	0	0	0	0	0.818482	149/10000	7	2.80229e-161
UniValnordMG_2_bin.12	FingerMtsudMG_2	30.62	41.474	6	21	46	1095221	98.4573	0.938	0.901	0.863	0.829	0.797	0.991861	8423/10000	6	0
UniValnordMG_2_bin.14	FingerMtsudMG_2	6.976	6.558	2	6	11	203407	97.5377	0.828	0.751	0.677	0.613	0.556	0.970159	5293/10000	3	0
UniValnordMG_2_bin.23	FingerMtsudMG_2	11.991	16.482	1	8	20	341790	97.3467	0.838	0.744	0.672	0.62	0.581	0.973425	5680/10000	3	0
UniValnordMG_2_bin.36	FingerMtsudMG_2	48.855	27.678	41	49	57	1179142	99.5339	0.976	0.973	0.97	0.966	0.963	0.997989	9586/10000	42	0
UniValnordMG_2_bin.45	FingerMtsudMG_2	4.011	15.616	1	2	4	80862	98.348	0.851	0.67	0.495	0.346	0.237	0.982022	6832/10000	2	0
UniValnordMG_2_bin.58	FingerMtsudMG_2	42.219	25.422	23	47	60	1580784	97.8526	0.919	0.896	0.879	0.867	0.858	0.987054	7606/10000	33	0
UniValnordMG_2_bin.66	FingerMtsudMG_2	2.236	6.563	0	0	2	55628	94.9962	0.306	0.25	0.209	0.178	0.153	0.912535	1463/10000	9	0
UniValsudMG_2_bin.107	FingerMtsudMG_2	476.849	167.253	433	486	530	10183877	99.657	0.998	0.998	0.998	0.998	0.997	0.999072	9807/10000	395	0
UniValsudMG_2_bin.109	FingerMtsudMG_2	0.045	3.369	0	0	0	313	0	0.001	0	0	0	0	0.810088	120/10000	4	2.53621e-119
UniValsudMG_2_bin.113	FingerMtsudMG_2	0.285	13.546	0	0	0	5270	90.1231	0.012	0.008	0.007	0.006	0.005	0.866556	494/10000	6	0
UniValsudMG_2_bin.125	FingerMtsudMG_2	6.165	7.682	3	5	8	205152	97.5067	0.861	0.811	0.752	0.677	0.587	0.977139	6153/10000	5	0
UniValsudMG_2_bin.127	FingerMtsudMG_2	0	0.019	0	0	0	7	0	0	0	0	0	0	0.776264	49/10000	1	6.83791e-32
UniValsudMG_2_bin.16	FingerMtsudMG_2	0.168	9.677	0	0	0	5134	0	0.004	0.003	0.003	0.003	0.003	0.837769	243/10000	6	0
UniValsudMG_2_bin.19	FingerMtsudMG_2	16.913	20.7	12	16	20	353450	99.4609	0.94	0.938	0.935	0.933	0.929	0.99453	8912/10000	14	0
UniValsudMG_2_bin.26	FingerMtsudMG_2	5.578	4.621	3	5	8	169134	99.1072	0.93	0.88	0.807	0.713	0.6	0.992051	8457/10000	5	0
UniValsudMG_2_bin.27	FingerMtsudMG_2	6.653	26.99	0	0	0	244128	93.9442	0.154	0.141	0.132	0.125	0.12	0.91081	1406/10000	19	0
UniValsudMG_2_bin.44	FingerMtsudMG_2	3.093	22.985	0	0	0	66627	93.688	0.115	0.096	0.085	0.079	0.073	0.903677	1192/10000	9	0
UniValsudMG_2_bin.59	FingerMtsudMG_2	1.377	22.238	0	0	0	27385	91.2623	0.041	0.033	0.028	0.025	0.023	0.882763	729/10000	9	0
UniValsudMG_2_bin.68	FingerMtsudMG_2	0.391	15.72	0	0	0	9197	90.3294	0.016	0.01	0.007	0.005	0.005	0.879534	675/10000	4	0
UniValsudMG_2_bin.71	FingerMtsudMG_2	0.417	7.285	0	0	0	8561	90.9469	0.03	0.021	0.016	0.013	0.011	0.874684	601/10000	5	0
UniValsudMG_2_bin.79	FingerMtsudMG_2	0.228	9.534	0	0	0	5096	0	0.006	0.005	0.004	0.004	0.004	0.863439	458/10000	6	0
BatPronordMG_2_bin.40	KnobheadnordMG_2	1.325	8.593	0	0	1	46446	95.012	0.319	0.224	0.164	0.123	0.093	0.906409	1270/10000	4	0
BatPronordMG_2_bin.42	KnobheadnordMG_2	0.22	5.688	0	0	0	7502	89.3475	0.016	0.007	0.005	0.004	0.004	0.827593	188/10000	3	1.28818e-222
ButProsudMG_2_bin.21	KnobheadnordMG_2	184.329	114.886	114	210	240	6382413	99.1323	0.983	0.979	0.976	0.974	0.971	0.99749	9486/10000	128	0
FingerMtnordMG_2_bin.101	KnobheadnordMG_2	7.414	7.357	0	6	13	224886	96.1854	0.683	0.642	0.608	0.58	0.551	0.946362	3142/10000	11	0
FingerMtnordMG_2_bin.102	KnobheadnordMG_2	0.29	6.687	0	0	0	6380	0	0.012	0.009	0.008	0.007	0.006	0.864678	472/10000	4	0
FingerMtnordMG_2_bin.103	KnobheadnordMG_2	1.269	11.773	0	0	0	12159	91.8918	0.059	0.049	0.042	0.037	0.034	0.890712	880/10000	7	0
FingerMtnordMG_2_bin.104	KnobheadnordMG_2	0.252	7.622	0	0	0	6000	90.5683	0.018	0.012	0.008	0.007	0.006	0.863974	464/10000	5	0
FingerMtnordMG_2_bin.109	KnobheadnordMG_2	0	0.018	0	0	0	8	0	0	0	0	0	0	0.735975	16/10000	4	4.46497e-05
FingerMtnordMG_2_bin.118	KnobheadnordMG_2	0.26	3.058	0	0	0	6883	90.9373	0.042	0.031	0.025	0.021	0.018	0.856224	384/10000	7	0
FingerMtnordMG_2_bin.120	KnobheadnordMG_2	0.153	2.4	0	0	0	2837	89.872	0.018	0.013	0.011	0.009	0.007	0.837273	240/10000	8	0
FingerMtnordMG_2_bin.121	KnobheadnordMG_2	17.487	149.427	0	4	9	1010398	96.3108	0.708	0.658	0.609	0.555	0.496	0.951598	3528/10000	7	0
FingerMtnordMG_2_bin.125	KnobheadnordMG_2	7.5	35.369	0	0	0	185088	93.5005	0.229	0.197	0.18	0.17	0.161	0.900344	1103/10000	16	0
FingerMtnordMG_2_bin.130	KnobheadnordMG_2	1.228	2.735	0	0	1	33566	94.6003	0.282	0.218	0.171	0.135	0.106	0.902507	1160/10000	6	0
FingerMtnordMG_2_bin.137	KnobheadnordMG_2	3.38	22.925	0	0	2	96793	95.2044	0.35	0.254	0.193	0.152	0.123	0.919365	1711/10000	4	0
FingerMtnordMG_2_bin.15	KnobheadnordMG_2	9.442	54.167	0	1	3	267282	96.4871	0.607	0.417	0.293	0.221	0.182	0.945771	3101/10000	4	0
FingerMtnordMG_2_bin.17	KnobheadnordMG_2	0.007	0.536	0	0	0	270	0	0.001	0	0	0	0	0.765949	37/10000	2	1.16622e-20
FingerMtnordMG_2_bin.18	KnobheadnordMG_2	0.011	0.545	0	0	0	550	0	0.001	0.001	0.001	0.001	0.001	0.777011	50/10000	2	3.63505e-33
FingerMtnordMG_2_bin.19	KnobheadnordMG_2	1.093	8.097	0	0	0	26556	92.1152	0.064	0.054	0.047	0.042	0.038	0.858498	406/10000	12	0
FingerMtnordMG_2_bin.22	KnobheadnordMG_2	0.043	1.915	0	0	0	1622	0	0.003	0.002	0.002	0.002	0.001	0.790094	71/10000	4	2.44076e-56
FingerMtnordMG_2_bin.24	KnobheadnordMG_2	0.029	0.84	0	0	0	1165	0	0.003	0.002	0.002	0.002	0.002	0.79364	78/10000	7	1.04312e-64
FingerMtnordMG_2_bin.29	KnobheadnordMG_2	0.274	5.089	0	0	0	7800	91.1325	0.035	0.025	0.019	0.015	0.012	0.872699	573/10000	4	0
FingerMtnordMG_2_bin.3	KnobheadnordMG_2	0.009	0.317	0	0	0	232	0	0.002	0.001	0.001	0.001	0.001	0.796895	85/10000	3	2.37693e-73
FingerMtnordMG_2_bin.31	KnobheadnordMG_2	0.225	5.736	0	0	0	5158	0	0.008	0.005	0.004	0.004	0.004	0.853483	359/10000	3	0
FingerMtnordMG_2_bin.33	KnobheadnordMG_2	0.107	2.798	0	0	0	3139	90.3498	0.024	0.015	0.01	0.007	0.005	0.844713	289/10000	5	0
FingerMtnordMG_2_bin.35	KnobheadnordMG_2	0	0.097	0	0	0	44	0	0	0	0	0	0	0.74722	22/10000	6	9.37547e-09
FingerMtnordMG_2_bin.38	KnobheadnordMG_2	0.317	6.181	0	0	0	7923	91.2595	0.022	0.018	0.015	0.014	0.012	0.837273	240/10000	7	0
FingerMtnordMG_2_bin.41	KnobheadnordMG_2	0.123	1.252	0	0	0	2359	90.1355	0.022	0.015	0.012	0.01	0.009	0.851395	341/10000	7	0
FingerMtnordMG_2_bin.53	KnobheadnordMG_2	7.864	29.017	0	0	6	244920	95.948	0.431	0.367	0.326	0.296	0.274	0.927421	2055/10000	14	0
FingerMtnordMG_2_bin.57	KnobheadnordMG_2	6.474	68.682	0	0	0	194950	92.6091	0.111	0.097	0.088	0.081	0.076	0.893559	941/10000	10	0
FingerMtnordMG_2_bin.58	KnobheadnordMG_2	1.297	2.84	0	0	2	21756	95.1245	0.333	0.251	0.19	0.141	0.105	0.907781	1311/10000	5	0
FingerMtnordMG_2_bin.61	KnobheadnordMG_2	0.612	17.193	0	0	0	16461	0	0.008	0.007	0.006	0.006	0.005	0.853934	363/10000	4	0
FingerMtnordMG_2_bin.63	KnobheadnordMG_2	0.172	9.45	0	0	0	7795	0	0.004	0.003	0.003	0.003	0.003	0.852219	348/10000	3	0
FingerMtnordMG_2_bin.65	KnobheadnordMG_2	0.159	1.485	0	0	0	6280	90.9259	0.033	0.023	0.017	0.013	0.011	0.865198	478/10000	6	0
FingerMtnordMG_2_bin.66	KnobheadnordMG_2	1.16	11.38	0	0	0	51271	93.3729	0.167	0.132	0.108	0.091	0.077	0.891334	893/10000	8	0
FingerMtnordMG_2_bin.70	KnobheadnordMG_2	1.543	11.781	0	0	0	49654	91.9104	0.066	0.055	0.047	0.042	0.039	0.884237	755/10000	8	0
FingerMtnordMG_2_bin.85	KnobheadnordMG_2	0.35	4.526	0	0	0	17226	91.7191	0.057	0.043	0.034	0.027	0.022	0.874684	601/10000	4	0
FingerMtnordMG_2_bin.86	KnobheadnordMG_2	0.201	5.221	0	0	0	8888	0	0.006	0.005	0.004	0.004	0.004	0.826532	183/10000	3	1.21257e-214
FingerMtnordMG_2_bin.89	KnobheadnordMG_2	0.125	3.599	0	0	0	2616	0	0.004	0.004	0.003	0.003	0.003	0.842131	271/10000	3	0
FingerMtnordMG_2_bin.9	KnobheadnordMG_2	0.836	2.888	0	0	0	37071	93.2212	0.161	0.119	0.095	0.079	0.066	0.890567	877/10000	4	0
FingerMtnordMG_2_bin.94	KnobheadnordMG_2	0.354	4.521	0	0	0	8154	91.1916	0.062	0.039	0.027	0.021	0.016	0.87941	673/10000	4	0
FingerMtnordMG_2_bin.96	KnobheadnordMG_2	1.311	19.572	0	0	0	25492	90.8129	0.033	0.026	0.021	0.018	0.016	0.876183	623/10000	5	0
FingerMtnordMG_2_bin.98	KnobheadnordMG_2	0.449	7.06	0	0	0	8096	90.7263	0.019	0.015	0.013	0.012	0.011	0.876116	622/10000	5	0
FingerMtnordMG_2_bin.99	KnobheadnordMG_2	0.273	9.106	0	0	0	9308	91.5182	0.094	0.033	0.012	0.005	0.003	0.861511	437/10000	1	0
FingerMtsudMG_2_bin.2	KnobheadnordMG_2	11.649	48.121	3	6	10	599390	99.2885	0.885	0.827	0.757	0.68	0.599	0.99204	8455/10000	4	0
FingerMtsudMG_2_bin.24	KnobheadnordMG_2	2.395	28.205	0	0	1	53424	94.7794	0.39	0.184	0.093	0.058	0.043	0.945098	3055/10000	2	0
FingerMtsudMG_2_bin.25	KnobheadnordMG_2	5.758	8.382	3	5	7	118028	99.3484	0.96	0.897	0.799	0.673	0.538	0.99499	8999/10000	4	0
FingerMtsudMG_2_bin.3	KnobheadnordMG_2	10.647	11.473	7	10	14	357675	99.5124	0.887	0.877	0.868	0.854	0.833	0.992734	8580/10000	9	0
FingerMtsudMG_2_bin.49	KnobheadnordMG_2	202.107	141.238	173	197	221	5865915	99.8975	0.993	0.991	0.99	0.989	0.988	0.999121	9817/10000	165	0
FingerMtsudMG_2_bin.5	KnobheadnordMG_2	0.809	10.104	0	0	0	16968	93.0739	0.188	0.135	0.098	0.072	0.053	0.884349	757/10000	6	0
FingerMtsudMG_2_bin.50	KnobheadnordMG_2	0.147	1.937	0	0	0	2730	89.8004	0.026	0.014	0.01	0.008	0.007	0.848696	319/10000	3	0
FingerMtsudMG_2_bin.66	KnobheadnordMG_2	0.085	0.699	0	0	0	1566	90.4496	0.026	0.018	0.011	0.008	0.006	0.850067	330/10000	6	0
FingerMtsudMG_2_bin.74	KnobheadnordMG_2	2.31	16.291	0	0	0	54301	91.8292	0.074	0.065	0.059	0.055	0.051	0.885176	772/10000	7	0
FingerMtsudMG_2_bin.9	KnobheadnordMG_2	137.314	466.498	20	39	210	7927176	99.1627	0.92	0.911	0.904	0.899	0.893	0.994253	8860/10000	21	0
KnobheadnordMG_2_bin.23	KnobheadnordMG_2	44.388	47.727	29	35	43	1317722	99.9862	1	1	1	1	0.999	1	10000/10000	29	0
KnobheadnordMG_2_bin.34	KnobheadnordMG_2	15.206	7.58	12	15	18	416419	99.9972	1	0.999	0.998	0.996	0.992	0.99999	9998/10000	12	0
KnobheadnordMG_2_bin.72	KnobheadnordMG_2	34.849	29.122	25	30	36	812944	99.9929	1	1	1	1	1	1	10000/10000	26	0
KnobheadsudMG_2_bin.2	KnobheadnordMG_2	7.059	21.191	0	0	7	176986	95.9356	0.447	0.398	0.361	0.33	0.304	0.923592	1884/10000	14	0
KnobheadsudMG_2_bin.4	KnobheadnordMG_2	30.516	30.254	22	32	39	635292	96.9361	0.973	0.964	0.951	0.934	0.917	0.99384	8783/10000	6	0
KnobheadsudMG_2_bin.48	KnobheadnordMG_2	0.102	1.019	0	0	0	2890	90.4932	0.029	0.018	0.012	0.008	0.006	0.846217	300/10000	6	0
KnobheadsudMG_2_bin.80	KnobheadnordMG_2	173.474	619.859	4	158	273	7602355	96.7882	0.814	0.792	0.775	0.762	0.749	0.974777	5848/10000	204	0
LinTernordMG_2_bin.2	KnobheadnordMG_2	3.005	27.152	0	0	0	92560	91.3478	0.113	0.073	0.061	0.056	0.053	0.907483	1302/10000	5	0
LinTernordMG_2_bin.21	KnobheadnordMG_2	49.037	140.314	17	30	41	2836377	99.3817	0.959	0.944	0.932	0.922	0.913	0.996723	9334/10000	17	0
LinTernordMG_2_bin.22	KnobheadnordMG_2	4.389	41.276	0	0	0	131655	92.2873	0.066	0.058	0.053	0.049	0.046	0.879285	671/10000	22	0
LinTernordMG_2_bin.4	KnobheadnordMG_2	1.401	12.778	0	0	0	39867	91.2422	0.052	0.043	0.037	0.034	0.032	0.872188	566/10000	7	0
LinTernordMG_2_bin.44	KnobheadnordMG_2	0.968	11.65	0	0	0	25956	91.1773	0.057	0.035	0.026	0.022	0.019	0.893013	929/10000	4	0
LinTernordMG_2_bin.8	KnobheadnordMG_2	8.013	30.866	0	1	4	253192	96.4488	0.536	0.407	0.328	0.281	0.25	0.94523	3064/10000	3	0
MtNewZealnordMG_2_bin.1	KnobheadnordMG_2	1.507	14.127	0	0	1	32732	94.9213	0.285	0.216	0.166	0.125	0.095	0.903242	1180/10000	5	0
MtNewZealnordMG_2_bin.10	KnobheadnordMG_2	0.389	4.915	0	0	0	14450	91.695	0.065	0.044	0.033	0.025	0.019	0.877632	645/10000	4	0
MtNewZealnordMG_2_bin.105	KnobheadnordMG_2	0.37	6.953	0	0	0	8769	91.2528	0.021	0.017	0.014	0.013	0.011	0.83694	238/10000	5	2.33017e-305
MtNewZealnordMG_2_bin.16	KnobheadnordMG_2	11.004	11.623	4	11	16	313257	97.495	0.893	0.839	0.801	0.773	0.749	0.983312	7023/10000	8	0
MtNewZealnordMG_2_bin.19	KnobheadnordMG_2	0.911	5.38	0	0	1	21755	94.7915	0.319	0.127	0.054	0.03	0.021	0.942165	2862/10000	1	0
MtNewZealnordMG_2_bin.25	KnobheadnordMG_2	21.611	150.066	0	3	19	723279	96.829	0.662	0.561	0.508	0.478	0.455	0.956164	3901/10000	3	0
MtNewZealnordMG_2_bin.27	KnobheadnordMG_2	3.049	20.345	0	0	0	115466	94.0182	0.114	0.097	0.085	0.078	0.072	0.902728	1166/10000	7	0
MtNewZealnordMG_2_bin.7	KnobheadnordMG_2	0.243	6.74	0	0	0	7131	89.9396	0.013	0.005	0.004	0.004	0.003	0.821506	161/10000	3	2.68594e-180
MtNewZealnordMG_2_bin.74	KnobheadnordMG_2	14.221	6.99	11	14	18	597383	99.2151	0.96	0.952	0.946	0.94	0.933	0.994827	8968/10000	12	0
MtNewZealnordMG_2_bin.9	KnobheadnordMG_2	0.56	19.596	0	0	0	8804	0	0.007	0.005	0.005	0.004	0.004	0.846618	303/10000	6	0
PudButnordMG_2_bin.11	KnobheadnordMG_2	0.03	2.146	0	0	0	1027	0	0.002	0.002	0.001	0.001	0.001	0.781216	56/10000	3	1.86569e-39
PudButnordMG_2_bin.13	KnobheadnordMG_2	0.031	3.992	0	0	0	980	0	0.001	0	0	0	0	0.789561	70/10000	3	3.62531e-55
PudButnordMG_2_bin.2	KnobheadnordMG_2	0.335	4.651	0	0	0	6729	91.0022	0.027	0.021	0.017	0.015	0.013	0.872335	568/10000	5	0
PudButnordMG_2_bin.22	KnobheadnordMG_2	8.475	14.453	0	1	14	454103	95.4789	0.506	0.443	0.409	0.386	0.369	0.929377	2148/10000	11	0
PudButnordMG_2_bin.3	KnobheadnordMG_2	5.369	52.13	0	0	0	306233	93.8601	0.209	0.171	0.147	0.13	0.116	0.912028	1446/10000	6	0
PudButnordMG_2_bin.36	KnobheadnordMG_2	2.206	2.307	0	2	3	79758	98.0617	0.75	0.554	0.369	0.227	0.13	0.976023	6007/10000	2	0
PudButnordMG_2_bin.42	KnobheadnordMG_2	0.095	1.829	0	0	0	3469	0	0.005	0.004	0.004	0.004	0.004	0.779864	54/10000	3	2.51037e-37
PudButnordMG_2_bin.5	KnobheadnordMG_2	5.804	19.633	0	0	1	80901	93.8112	0.299	0.235	0.205	0.188	0.174	0.921685	1804/10000	7	0
PudButnordMG_2_bin.53	KnobheadnordMG_2	0.135	1.095	0	0	0	4224	90.394	0.031	0.022	0.016	0.013	0.01	0.869697	533/10000	4	0
PudButnordMG_2_bin.56	KnobheadnordMG_2	0.83	4.958	0	0	0	35799	92.8265	0.137	0.106	0.086	0.072	0.06	0.881594	709/10000	9	0
PudButnordMG_2_bin.59	KnobheadnordMG_2	0	0.024	0	0	0	12	0	0	0	0	0	0	0.787352	66/10000	4	1.52694e-50
PudButnordMG_2_bin.60	KnobheadnordMG_2	0.074	2.951	0	0	0	2995	0	0.002	0.001	0.001	0.001	0.001	0.754543	27/10000	2	2.3752e-12
PudButnordMG_2_bin.67	KnobheadnordMG_2	0.053	4.871	0	0	0	1435	0	0.002	0.001	0.001	0.001	0	0.848696	319/10000	6	0
PudButnordMG_2_bin.81	KnobheadnordMG_2	2.131	25.528	0	0	0	55321	92.3562	0.053	0.046	0.042	0.039	0.037	0.875981	620/10000	12	0
PudButnordMG_2_bin.85	KnobheadnordMG_2	11.552	17.768	1	6	15	354083	97.8079	0.834	0.745	0.666	0.604	0.553	0.970194	5297/10000	3	0
PudButnordMG_2_bin.88	KnobheadnordMG_2	4.599	11.772	0	0	2	112740	94.8041	0.287	0.255	0.232	0.215	0.2	0.899162	1073/10000	16	0
PudButnordMG_2_bin.90	KnobheadnordMG_2	14.569	95.617	0	0	9	755332	96.1202	0.492	0.416	0.37	0.341	0.317	0.938668	2647/10000	7	0
PudButnordMG_2_bin.95	KnobheadnordMG_2	1.446	11.868	0	0	0	70118	93.8126	0.197	0.163	0.137	0.118	0.101	0.890373	873/10000	9	0
PudButsudMG_2_bin.15	KnobheadnordMG_2	35.857	16.701	30	37	44	978637	97.7661	0.936	0.93	0.926	0.924	0.921	0.980465	6608/10000	32	0
PudButsudMG_2_bin.38	KnobheadnordMG_2	0.686	15.094	0	0	0	22997	90.5097	0.022	0.014	0.011	0.011	0.01	0.837769	243/10000	5	0
PudButsudMG_2_bin.44	KnobheadnordMG_2	1.356	5.342	0	0	1	47749	95.0642	0.309	0.228	0.172	0.131	0.1	0.902395	1157/10000	5	0
PudButsudMG_2_bin.46	KnobheadnordMG_2	0.74	2.028	0	0	0	19984	93.9057	0.208	0.148	0.106	0.076	0.056	0.88362	744/10000	6	0
PudButsudMG_2_bin.57	KnobheadnordMG_2	3.437	27.555	0	0	0	82370	91.993	0.113	0.093	0.081	0.073	0.066	0.900421	1105/10000	11	0
PudButsudMG_2_bin.59	KnobheadnordMG_2	172.5	332.182	5	121	271	10384246	97.5046	0.896	0.853	0.817	0.789	0.765	0.986961	7591/10000	13	0
PudButsudMG_2_bin.62	KnobheadnordMG_2	70.253	42.149	58	75	86	2494509	99.0584	0.927	0.918	0.911	0.905	0.9	0.992291	8500/10000	63	0
PudButsudMG_2_bin.78	KnobheadnordMG_2	6.26	43.826	0	0	0	155496	92.6931	0.135	0.12	0.111	0.104	0.098	0.89283	925/10000	22	0
RickerHillsnord_2_bin.11	KnobheadnordMG_2	5.828	15.9	0	0	1	161091	94.0206	0.259	0.233	0.216	0.203	0.191	0.898438	1055/10000	33	0
RickerHillsnord_2_bin.17	KnobheadnordMG_2	0.455	13.286	0	0	0	9725	90.9846	0.04	0.028	0.021	0.016	0.013	0.88407	752/10000	4	0
RickerHillsnord_2_bin.19	KnobheadnordMG_2	6.299	19.07	3	6	8	124284	97.1544	0.853	0.816	0.766	0.695	0.609	0.974017	5753/10000	5	0
RickerHillsnord_2_bin.23	KnobheadnordMG_2	2.452	31.661	0	0	0	78275	92.4016	0.043	0.038	0.034	0.032	0.03	0.872115	565/10000	7	0
RickerHillsnord_2_bin.25	KnobheadnordMG_2	0.271	10.296	0	0	0	9405	90.7056	0.011	0.008	0.007	0.006	0.005	0.843585	281/10000	4	0
RickerHillsnord_2_bin.26	KnobheadnordMG_2	3.436	20.391	0	0	0	79583	92.8378	0.137	0.119	0.108	0.1	0.093	0.901191	1125/10000	10	0
RickerHillsnord_2_bin.29	KnobheadnordMG_2	2.628	20.158	0	0	0	42012	91.6293	0.064	0.055	0.049	0.046	0.044	0.886837	803/10000	11	0
RickerHillsnord_2_bin.30	KnobheadnordMG_2	92.037	55.373	77	100	114	2056607	98.6994	0.944	0.939	0.935	0.931	0.927	0.991574	8372/10000	64	0
RickerHillsnord_2_bin.32	KnobheadnordMG_2	2.53	26.13	0	0	0	70136	91.8882	0.097	0.078	0.068	0.06	0.055	0.896151	1000/10000	8	0
RickerHillsnord_2_bin.34	KnobheadnordMG_2	13.848	58.491	0	0	3	831172	94.5691	0.307	0.276	0.256	0.241	0.229	0.930758	2216/10000	14	0
RickerHillsnord_2_bin.36	KnobheadnordMG_2	4.343	28.68	0	0	0	171804	92.3233	0.087	0.075	0.068	0.063	0.059	0.891144	889/10000	16	0
RickerHillsnord_2_bin.37	KnobheadnordMG_2	1.926	18.487	0	0	0	47718	92.4114	0.056	0.047	0.041	0.038	0.036	0.892507	918/10000	7	0
RickerHillsnord_2_bin.48	KnobheadnordMG_2	101.914	85.253	29	79	169	2590001	99.7688	0.998	0.997	0.995	0.994	0.992	0.999608	9918/10000	24	0
RickerHillsnord_2_bin.50	KnobheadnordMG_2	4.067	11.002	0	0	5	84054	95.8539	0.411	0.357	0.316	0.284	0.257	0.917645	1645/10000	11	0
RickerHillsnord_2_bin.54	KnobheadnordMG_2	13.506	70.101	5	7	10	471350	99.7979	0.982	0.96	0.92	0.857	0.774	0.998452	9680/10000	6	0
RickerHillsnord_2_bin.55	KnobheadnordMG_2	3.462	21.829	0	0	0	103699	92.7254	0.093	0.081	0.075	0.07	0.067	0.895851	993/10000	12	0
RickerHillsnord_2_bin.63	KnobheadnordMG_2	0.15	2.736	0	0	0	5952	0	0.006	0.006	0.005	0.005	0.005	0.778463	52/10000	2	3.13831e-35
RickerHillsnord_2_bin.8	KnobheadnordMG_2	6.622	16.381	0	0	2	162161	94.1809	0.298	0.269	0.249	0.234	0.22	0.89666	1012/10000	36	0
RicNunsandstonMG_3_bin.1	KnobheadnordMG_2	1.992	17.396	0	0	0	30896	0	0.04	0.035	0.031	0.029	0.027	0.88259	726/10000	7	0
RicNunsandstonMG_3_bin.11	KnobheadnordMG_2	1.097	2.012	0	1	2	43281	96.1893	0.514	0.267	0.132	0.066	0.036	0.950874	3472/10000	1	0
RicNunsandstonMG_3_bin.12	KnobheadnordMG_2	111.885	160.866	1	60	211	2743861	95.684	0.751	0.727	0.711	0.698	0.688	0.950991	3481/10000	30	0
RicNunsandstonMG_3_bin.13	KnobheadnordMG_2	0.456	6.472	0	0	0	4128	0	0.019	0.016	0.013	0.012	0.011	0.844852	290/10000	13	0
RicNunsandstonMG_3_bin.19	KnobheadnordMG_2	0.305	3.731	0	0	0	8087	90.7664	0.024	0.019	0.016	0.014	0.012	0.847409	309/10000	11	0
RicNunsandstonMG_3_bin.21	KnobheadnordMG_2	0.463	4.372	0	0	0	11222	91.0123	0.034	0.028	0.025	0.022	0.02	0.868436	517/10000	8	0
RicNunsandstonMG_3_bin.25	KnobheadnordMG_2	12.293	30.992	0	2	20	358051	95.5362	0.54	0.503	0.48	0.461	0.445	0.927699	2068/10000	23	0
RicNunsandstonMG_3_bin.26	KnobheadnordMG_2	0.195	5.618	0	0	0	2671	0	0.008	0.005	0.004	0.004	0.003	0.845948	298/10000	3	0
RicNunsandstonMG_3_bin.35	KnobheadnordMG_2	0.027	1.263	0	0	0	941	89.3543	0.004	0.001	0.001	0.001	0.001	0.775502	48/10000	1	3.88945e-31
RicNunsandstonMG_3_bin.43	KnobheadnordMG_2	2.039	18.366	0	0	0	43097	92.4462	0.101	0.084	0.073	0.064	0.057	0.894852	970/10000	7	0
RicNunsandstonMG_3_bin.47	KnobheadnordMG_2	0.14	3.188	0	0	0	2339	0	0.006	0.005	0.004	0.003	0.003	0.857376	395/10000	4	0
RicNunsandstonMG_3_bin.48	KnobheadnordMG_2	9.158	98.773	0	0	1	373693	94.2966	0.257	0.216	0.189	0.169	0.154	0.911087	1415/10000	9	0
RicNunsandstonMG_3_bin.58	KnobheadnordMG_2	0.08	0.733	0	0	0	1626	90.2054	0.024	0.016	0.011	0.008	0.005	0.846352	301/10000	5	0
RicNunsandstonMG_3_bin.62	KnobheadnordMG_2	0.201	4.114	0	0	0	4909	92.23	0.015	0.012	0.01	0.009	0.008	0.836772	237/10000	5	1.17894e-303
RicNunsandstonMG_3_bin.63	KnobheadnordMG_2	0.191	2.283	0	0	0	3992	90.2065	0.026	0.019	0.015	0.013	0.011	0.848569	318/10000	4	0
RicNunsandstonMG_3_bin.67	KnobheadnordMG_2	0	0.013	0	0	0	5	0	0	0	0	0	0	0.743837	20/10000	8	1.91966e-07
RicNunsandstonMG_3_bin.7	KnobheadnordMG_2	0.041	6.122	0	0	0	1173	0	0	0	0	0	0	0.743837	20/10000	18	1.91966e-07
RicNunsandstonMG_3_bin.70	KnobheadnordMG_2	3.567	10.509	0	0	1	87828	94.7149	0.262	0.228	0.206	0.188	0.174	0.904712	1221/10000	11	0
RicNunsandstonMG_3_bin.74	KnobheadnordMG_2	3.225	20.744	0	0	0	85099	92.03	0.084	0.073	0.067	0.062	0.059	0.888691	839/10000	12	0
RicNunsandstonMG_3_bin.78	KnobheadnordMG_2	9.247	75.193	0	0	1	406079	94.25	0.262	0.219	0.191	0.171	0.156	0.914112	1517/10000	9	0
RicNunsandstonMG_3_bin.85	KnobheadnordMG_2	0.009	0.267	0	0	0	325	89.2078	0.004	0.001	0.001	0	0	0.766923	38/10000	1	1.46797e-21
RicNunsandstonMG_3_bin.86	KnobheadnordMG_2	0.88	11.001	0	0	0	21003	91.4845	0.033	0.029	0.027	0.025	0.024	0.847016	306/10000	17	0
RicNunsandstonMG_3_bin.88	KnobheadnordMG_2	5.014	4.71	1	5	8	190986	97.8425	0.779	0.737	0.678	0.602	0.515	0.975806	5979/10000	5	0
RicNunsandstonMG_3_bin.89	KnobheadnordMG_2	0.864	18.342	0	0	0	28963	91.033	0.019	0.016	0.014	0.013	0.012	0.872115	565/10000	6	0
RicNunsandstonMG_3_bin.90	KnobheadnordMG_2	0.077	2.788	0	0	0	1652	0	0.002	0.002	0.002	0.002	0.002	0.754543	27/10000	49	2.3752e-12
RicNunsandstonMG_3_bin.91	KnobheadnordMG_2	1.408	6.64	0	0	0	61280	93.8521	0.211	0.169	0.142	0.121	0.104	0.898153	1048/10000	7	0
RicNunsandstonMG_3_bin.93	KnobheadnordMG_2	0.247	2.848	0	0	0	8958	91.4105	0.056	0.033	0.021	0.016	0.012	0.877045	636/10000	3	0
RicNunsandstonMG_3_bin.94	KnobheadnordMG_2	1.951	13.461	0	0	0	49554	91.7683	0.085	0.068	0.059	0.052	0.048	0.895635	988/10000	7	0
RicNunsandstonMG_3_bin.95	KnobheadnordMG_2	0	0.014	0	0	0	2	0	0	0	0	0	0	0.743837	20/10000	2	1.91966e-07
RicNunsandstonMG_4_bin.33	KnobheadnordMG_2	0.301	6.886	0	0	0	10430	89.7591	0.01	0.007	0.006	0.005	0.005	0.828424	192/10000	4	4.88271e-229
RicNunsandstonMG_4_bin.58	KnobheadnordMG_2	0.692	4.419	0	0	1	20538	94.8745	0.278	0.115	0.05	0.027	0.017	0.939205	2679/10000	1	0
RicNunsandstonMG_4_bin.63	KnobheadnordMG_2	7.38	10.635	5	7	9	150420	99.9566	0.993	0.975	0.934	0.866	0.774	0.99956	9908/10000	6	0
RicNunsandstonMG_4_bin.75	KnobheadnordMG_2	0.091	2.255	0	0	0	1568	89.7664	0.017	0.01	0.007	0.004	0.003	0.867791	509/10000	3	0
RicNunsandstonMG_4_bin.86	KnobheadnordMG_2	0.54	18.469	0	0	0	9971	90.8159	0.033	0.022	0.016	0.012	0.01	0.87916	669/10000	6	0
RicNunsandstonMG_4_bin.87	KnobheadnordMG_2	7.638	62.829	0	1	3	203934	98.4153	0.734	0.493	0.318	0.207	0.145	0.98134	6733/10000	2	0
RicNunsandstonMG_4_bin.94	KnobheadnordMG_2	27.486	45.516	9	29	37	1441123	98.4238	0.89	0.841	0.812	0.795	0.783	0.989147	7952/10000	25	0
SiePeanordMG_2_bin.15	KnobheadnordMG_2	15.33	67.847	0	2	14	642891	97.1602	0.665	0.549	0.479	0.435	0.404	0.955244	3823/10000	2	0
SiePeanordMG_2_bin.16	KnobheadnordMG_2	0.031	4.117	0	0	0	904	0	0.001	0	0	0	0	0.795068	81/10000	2	2.22101e-68
SiePeanordMG_2_bin.21	KnobheadnordMG_2	0.768	18.497	0	0	0	18730	90.0621	0.078	0.03	0.017	0.013	0.011	0.888285	831/10000	1	0
SiePeanordMG_2_bin.24	KnobheadnordMG_2	0.001	0.058	0	0	0	36	0	0.001	0	0	0	0	0.818482	149/10000	2	4.1274e-162
SiePeanordMG_2_bin.38	KnobheadnordMG_2	0.009	0.708	0	0	0	263	0	0.001	0	0	0	0	0.801526	96/10000	5	1.97487e-87
SiePeanordMG_2_bin.41	KnobheadnordMG_2	7.505	39.787	0	0	0	230040	93.4056	0.162	0.147	0.135	0.127	0.12	0.912387	1458/10000	16	0
SiePeanordMG_2_bin.44	KnobheadnordMG_2	8.949	26.922	3	6	9	228046	98.4138	0.884	0.849	0.802	0.736	0.654	0.987674	7707/10000	5	0
SiePeanordMG_2_bin.53	KnobheadnordMG_2	3.213	11.803	0	1	3	86633	96.6231	0.666	0.485	0.336	0.231	0.16	0.955066	3808/10000	2	0
SiePeanordMG_2_bin.56	KnobheadnordMG_2	5.7	10.078	3	5	7	150733	99.224	0.936	0.873	0.771	0.644	0.51	0.99248	8534/10000	4	0
SiePeanordMG_2_bin.60	KnobheadnordMG_2	33.629	60.314	8	14	41	964848	98.3326	0.924	0.909	0.896	0.883	0.866	0.986569	7528/10000	10	0
SiePeanordMG_2_bin.70	KnobheadnordMG_2	3.305	21.396	0	0	0	91468	94.5927	0.119	0.106	0.096	0.088	0.082	0.901267	1127/10000	10	0
SiePeanordMG_2_bin.71	KnobheadnordMG_2	0	0.01	0	0	0	2	0	0	0	0	0	0	0.800723	94/10000	8	7.91417e-85
SiePeanordMG_2_bin.9	KnobheadnordMG_2	4.915	37.446	0	0	2	165964	95.3435	0.327	0.265	0.219	0.185	0.158	0.915774	1576/10000	8	0
SiePeasudMG_2_bin.1	KnobheadnordMG_2	0.88	9.881	0	0	0	21199	91.4501	0.031	0.026	0.023	0.021	0.019	0.876183	623/10000	9	0
SiePeasudMG_2_bin.102	KnobheadnordMG_2	0.47	16.776	0	0	0	11159	0	0.008	0.006	0.005	0.005	0.005	0.854157	365/10000	5	0
SiePeasudMG_2_bin.103	KnobheadnordMG_2	0.08	1.625	0	0	0	1567	90.4023	0.014	0.009	0.006	0.004	0.003	0.861699	439/10000	5	0
SiePeasudMG_2_bin.105	KnobheadnordMG_2	0.289	8.404	0	0	0	10604	0	0.004	0.003	0.003	0.002	0.002	0.838258	246/10000	3	0
SiePeasudMG_2_bin.106	KnobheadnordMG_2	0.536	6.974	0	0	0	13799	90.7987	0.025	0.02	0.018	0.016	0.014	0.859592	417/10000	7	0
SiePeasudMG_2_bin.11	KnobheadnordMG_2	0.428	5.875	0	0	0	5353	91.1437	0.02	0.016	0.015	0.013	0.012	0.878593	660/10000	6	0
SiePeasudMG_2_bin.112	KnobheadnordMG_2	0.006	0.898	0	0	0	209	0	0	0	0	0	0	0.806388	109/10000	3	8.9098e-105
SiePeasudMG_2_bin.114	KnobheadnordMG_2	0.005	0.477	0	0	0	131	0	0	0	0	0	0	0.784403	61/10000	4	6.54631e-45
SiePeasudMG_2_bin.118	KnobheadnordMG_2	1.067	11.759	0	0	0	28139	91.7334	0.043	0.036	0.031	0.029	0.027	0.876383	626/10000	7	0
SiePeasudMG_2_bin.12	KnobheadnordMG_2	0.008	0.86	0	0	0	208	0	0	0	0	0	0	0.800723	94/10000	2	7.91417e-85
SiePeasudMG_2_bin.121	KnobheadnordMG_2	0.002	0.116	0	0	0	56	0	0	0	0	0	0	0.762871	34/10000	1	4.97174e-18
SiePeasudMG_2_bin.16	KnobheadnordMG_2	0.157	5.764	0	0	0	3288	0	0.007	0.005	0.005	0.004	0.004	0.843585	281/10000	8	0
SiePeasudMG_2_bin.2	KnobheadnordMG_2	1.995	28.419	0	0	0	40627	91.3938	0.05	0.041	0.036	0.033	0.031	0.884626	762/10000	8	0
SiePeasudMG_2_bin.22	KnobheadnordMG_2	0.039	1.039	0	0	0	1683	0	0.003	0.002	0.002	0.002	0.002	0.767872	39/10000	8	1.80059e-22
SiePeasudMG_2_bin.25	KnobheadnordMG_2	0.062	2.67	0	0	0	1189	0	0.002	0.001	0.001	0.001	0.001	0.799487	91/10000	5	5.859e-81
SiePeasudMG_2_bin.29	KnobheadnordMG_2	0	0	0	0	0	0	0	0	0	0	0	0	0.776264	49/10000	2	3.79829e-32
SiePeasudMG_2_bin.3	KnobheadnordMG_2	0.55	6.514	0	0	0	11938	91.1713	0.028	0.024	0.021	0.019	0.017	0.874126	593/10000	8	0
SiePeasudMG_2_bin.31	KnobheadnordMG_2	1.656	17.363	0	0	0	33370	91.556	0.077	0.065	0.058	0.052	0.048	0.888842	842/10000	9	0
SiePeasudMG_2_bin.35	KnobheadnordMG_2	0.591	6.194	0	0	0	16281	90.8394	0.032	0.026	0.023	0.02	0.018	0.887927	824/10000	7	0
SiePeasudMG_2_bin.36	KnobheadnordMG_2	0.007	0.408	0	0	0	276	0	0.001	0.001	0.001	0	0	0.761788	33/10000	2	3.53599e-17
SiePeasudMG_2_bin.38	KnobheadnordMG_2	0.626	6.77	0	0	0	13020	91.1839	0.034	0.028	0.024	0.021	0.019	0.870314	541/10000	8	0
SiePeasudMG_2_bin.40	KnobheadnordMG_2	2.028	17.473	0	0	0	112004	92.6119	0.135	0.112	0.098	0.088	0.08	0.887411	814/10000	8	0
SiePeasudMG_2_bin.41	KnobheadnordMG_2	0	0.009	0	0	0	2	0	0	0	0	0	0	0.80944	118/10000	4	3.46052e-117
SiePeasudMG_2_bin.44	KnobheadnordMG_2	0.195	5.181	0	0	0	4773	89.7059	0.007	0.005	0.004	0.004	0.004	0.85789	400/10000	4	0
SiePeasudMG_2_bin.47	KnobheadnordMG_2	0.02	0.841	0	0	0	588	0	0.002	0.002	0.001	0.001	0.001	0.829035	195/10000	3	7.05479e-234
SiePeasudMG_2_bin.50	KnobheadnordMG_2	0.318	11.784	0	0	0	11057	90.134	0.012	0.009	0.007	0.005	0.005	0.852568	351/10000	7	0
SiePeasudMG_2_bin.51	KnobheadnordMG_2	0.718	8.188	0	0	0	20711	91.2467	0.033	0.027	0.024	0.022	0.02	0.878339	656/10000	6	0
SiePeasudMG_2_bin.52	KnobheadnordMG_2	0.066	1.584	0	0	0	1813	0	0.005	0.004	0.004	0.003	0.003	0.845948	298/10000	5	0
SiePeasudMG_2_bin.55	KnobheadnordMG_2	0.04	4.847	0	0	0	924	0	0.003	0.001	0	0	0	0.763925	35/10000	1	6.79192e-19
SiePeasudMG_2_bin.56	KnobheadnordMG_2	0.077	3.037	0	0	0	2479	0	0.002	0.002	0.002	0.001	0.001	0.824323	173/10000	6	7.05859e-199
SiePeasudMG_2_bin.58	KnobheadnordMG_2	0.056	1.321	0	0	0	975	0	0.009	0.006	0.004	0.004	0.003	0.869929	536/10000	5	0
SiePeasudMG_2_bin.59	KnobheadnordMG_2	0.399	14.893	0	0	0	8024	90.7025	0.021	0.015	0.012	0.01	0.008	0.873774	588/10000	5	0
SiePeasudMG_2_bin.62	KnobheadnordMG_2	0.955	5.615	0	0	0	40560	91.7716	0.143	0.084	0.063	0.054	0.048	0.888081	827/10000	2	0
SiePeasudMG_2_bin.63	KnobheadnordMG_2	0.744	9.403	0	0	0	13281	90.728	0.032	0.025	0.021	0.019	0.017	0.865627	483/10000	6	0
SiePeasudMG_2_bin.64	KnobheadnordMG_2	2.435	32.797	0	0	0	55075	91.4209	0.053	0.044	0.038	0.034	0.032	0.883108	735/10000	9	0
SiePeasudMG_2_bin.65	KnobheadnordMG_2	0.356	10.082	0	0	0	7560	90.3495	0.016	0.011	0.009	0.007	0.006	0.862715	450/10000	5	0
SiePeasudMG_2_bin.67	KnobheadnordMG_2	0.032	1.785	0	0	0	1505	0	0.003	0.002	0.001	0.001	0.001	0.843585	281/10000	3	0
SiePeasudMG_2_bin.68	KnobheadnordMG_2	2.528	15.293	0	0	0	64031	92.3171	0.096	0.083	0.076	0.071	0.066	0.903423	1185/10000	7	0
SiePeasudMG_2_bin.69	KnobheadnordMG_2	0.163	4.134	0	0	0	4985	90.5909	0.03	0.02	0.015	0.011	0.009	0.859493	416/10000	5	0
SiePeasudMG_2_bin.7	KnobheadnordMG_2	0.152	5.362	0	0	0	2417	0	0.002	0.002	0.001	0.001	0.001	0.84754	310/10000	6	0
SiePeasudMG_2_bin.71	KnobheadnordMG_2	0.444	15.136	0	0	0	11462	89.8987	0.007	0.006	0.005	0.004	0.004	0.865025	476/10000	5	0
SiePeasudMG_2_bin.73	KnobheadnordMG_2	10.08	26.964	0	1	18	498017	95.7142	0.529	0.495	0.472	0.453	0.436	0.921417	1793/10000	24	0
SiePeasudMG_2_bin.74	KnobheadnordMG_2	0	0.006	0	0	0	1	0	0	0	0	0	0	0.77917	53/10000	2	2.83324e-36
SiePeasudMG_2_bin.76	KnobheadnordMG_2	0	0	0	0	0	0	0	0	0	0	0	0	0.803466	101/10000	3	5.12529e-94
SiePeasudMG_2_bin.77	KnobheadnordMG_2	0.157	3.225	0	0	0	1288	0	0.007	0.006	0.005	0.004	0.004	0.866556	494/10000	4	0
SiePeasudMG_2_bin.79	KnobheadnordMG_2	0.028	0.207	0	0	0	770	89.3869	0.022	0.005	0.001	0	0	0.833449	218/10000	1	1.21487e-271
SiePeasudMG_2_bin.8	KnobheadnordMG_2	0.253	3.354	0	0	0	4262	0	0.014	0.011	0.01	0.009	0.008	0.850311	332/10000	10	0
SiePeasudMG_2_bin.82	KnobheadnordMG_2	0.017	1.004	0	0	0	554	0	0.002	0.001	0.001	0.001	0.001	0.847409	309/10000	3	0
SiePeasudMG_2_bin.83	KnobheadnordMG_2	0	0.04	0	0	0	10	0	0	0	0	0	0	0.815215	137/10000	3	2.38414e-144
SiePeasudMG_2_bin.84	KnobheadnordMG_2	0.002	0.113	0	0	0	73	0	0.001	0	0	0	0	0.761788	33/10000	1	3.53599e-17
SiePeasudMG_2_bin.85	KnobheadnordMG_2	0.998	9.951	0	0	0	17146	91.1099	0.047	0.038	0.033	0.029	0.027	0.885933	786/10000	9	0
SiePeasudMG_2_bin.86	KnobheadnordMG_2	2.278	23.279	0	0	0	58114	91.875	0.068	0.058	0.052	0.047	0.044	0.891477	896/10000	8	0
SiePeasudMG_2_bin.87	KnobheadnordMG_2	0.318	10.513	0	0	0	5510	0	0.012	0.01	0.008	0.008	0.007	0.867219	502/10000	6	0
SiePeasudMG_2_bin.89	KnobheadnordMG_2	0.137	4.321	0	0	0	1581	0	0.005	0.004	0.003	0.003	0.003	0.861323	435/10000	4	0
SiePeasudMG_2_bin.92	KnobheadnordMG_2	0.014	1.656	0	0	0	504	0	0.001	0.001	0	0	0	0.858699	408/10000	3	0
SiePeasudMG_2_bin.93	KnobheadnordMG_2	0.055	2.324	0	0	0	1556	0	0.003	0.002	0.002	0.002	0.002	0.830035	200/10000	5	5.44962e-242
SiePeasudMG_2_bin.95	KnobheadnordMG_2	0.261	4.142	0	0	0	2874	0	0.018	0.013	0.011	0.01	0.009	0.853934	363/10000	6	0
TrioNunataknord_2_bin.100	KnobheadnordMG_2	0.185	8.139	0	0	0	1149	0	0.002	0.002	0.001	0.001	0.001	0.821262	160/10000	5	9.12187e-179
TrioNunataknord_2_bin.101	KnobheadnordMG_2	0.198	12.931	0	0	0	4639	90.6884	0.015	0.01	0.007	0.006	0.004	0.86537	480/10000	4	0
TrioNunataknord_2_bin.117	KnobheadnordMG_2	0.043	5.514	0	0	0	1185	0	0.001	0	0	0	0	0.78902	69/10000	2	5.30853e-54
TrioNunataknord_2_bin.126	KnobheadnordMG_2	0.608	7.853	0	0	0	14411	90.8923	0.024	0.02	0.017	0.015	0.014	0.857787	399/10000	9	0
TrioNunataknord_2_bin.24	KnobheadnordMG_2	0.122	10.72	0	0	0	3072	0	0.002	0.001	0.001	0.001	0.001	0.820273	156/10000	5	1.13861e-172
TrioNunataknord_2_bin.27	KnobheadnordMG_2	0.067	1.468	0	0	0	757	0	0.013	0.009	0.006	0.004	0.003	0.874336	596/10000	4	0
TrioNunataknord_2_bin.28	KnobheadnordMG_2	0.08	3.345	0	0	0	2662	0	0.002	0.002	0.002	0.001	0.001	0.796446	84/10000	4	4.23132e-72
TrioNunataknord_2_bin.29	KnobheadnordMG_2	24.149	54.436	12	17	23	643621	98.7973	0.915	0.901	0.892	0.886	0.88	0.99124	8313/10000	14	0
TrioNunataknord_2_bin.33	KnobheadnordMG_2	0.467	11.733	0	0	0	6455	0	0.006	0.005	0.005	0.004	0.004	0.84754	310/10000	5	0
TrioNunataknord_2_bin.44	KnobheadnordMG_2	0.255	10.64	0	0	0	8271	90.2688	0.007	0.005	0.004	0.003	0.003	0.845129	292/10000	4	0
TrioNunataknord_2_bin.46	KnobheadnordMG_2	0.349	16.322	0	0	0	6956	90.1676	0.013	0.009	0.007	0.005	0.004	0.867219	502/10000	3	0
TrioNunataknord_2_bin.58	KnobheadnordMG_2	0.193	3.268	0	0	0	3769	90.5958	0.03	0.019	0.013	0.01	0.007	0.894543	963/10000	5	0
TrioNunataknord_2_bin.6	KnobheadnordMG_2	1.415	13.145	0	0	0	40120	91.3671	0.046	0.039	0.035	0.032	0.03	0.892414	916/10000	7	0
TrioNunataknord_2_bin.63	KnobheadnordMG_2	1.108	16.457	0	0	0	35744	91.2552	0.036	0.03	0.027	0.025	0.023	0.861323	435/10000	7	0
TrioNunataknord_2_bin.66	KnobheadnordMG_2	0.084	3.3	0	0	0	1744	0	0.004	0.003	0.003	0.002	0.002	0.863886	463/10000	4	0
TrioNunataknord_2_bin.69	KnobheadnordMG_2	0.073	2.728	0	0	0	3207	0	0.003	0.002	0.002	0.002	0.002	0.760672	32/10000	3	2.44137e-16
TrioNunataknord_2_bin.79	KnobheadnordMG_2	2.407	26.41	0	0	0	32300	92.3102	0.051	0.045	0.041	0.038	0.037	0.889142	848/10000	12	0
TrioNunataknord_2_bin.83	KnobheadnordMG_2	0.297	13.811	0	0	0	7218	0	0.005	0.004	0.003	0.003	0.003	0.853256	357/10000	5	0
TrioNunataknord_2_bin.9	KnobheadnordMG_2	0.144	2.625	0	0	0	2047	90.3596	0.024	0.016	0.011	0.008	0.006	0.872262	567/10000	3	0
TrioNunataknord_2_bin.90	KnobheadnordMG_2	0.073	1.557	0	0	0	2454	0	0.006	0.005	0.004	0.004	0.003	0.778463	52/10000	2	3.13831e-35
TrioNunataknord_2_bin.94	KnobheadnordMG_2	0.578	7.643	0	0	0	10014	91.0176	0.023	0.019	0.017	0.015	0.014	0.86622	490/10000	10	0
TrioNunataknord_2_bin.95	KnobheadnordMG_2	0.008	0.578	0	0	0	161	0	0.001	0	0	0	0	0.815778	139/10000	3	2.80569e-147
UniValnordMG_2_bin.12	KnobheadnordMG_2	285.625	296.415	249	278	306	10243414	99.8014	0.983	0.977	0.973	0.97	0.967	0.998927	9777/10000	233	0
UniValnordMG_2_bin.14	KnobheadnordMG_2	0.172	3.025	0	0	0	5010	89.9935	0.012	0.007	0.006	0.005	0.005	0.839694	255/10000	4	0
UniValnordMG_2_bin.23	KnobheadnordMG_2	96.965	114.85	20	69	169	2764065	96.3973	0.898	0.888	0.879	0.871	0.864	0.970446	5326/10000	27	0
UniValnordMG_2_bin.36	KnobheadnordMG_2	89.218	40.691	76	90	102	2152756	99.8562	0.993	0.99	0.987	0.986	0.984	0.999097	9812/10000	73	0
UniValnordMG_2_bin.45	KnobheadnordMG_2	20.11	20.863	15	19	23	404787	99.8635	0.996	0.995	0.993	0.99	0.987	0.999584	9913/10000	15	0
UniValnordMG_2_bin.58	KnobheadnordMG_2	13.478	50.45	6	10	14	504178	99.0024	0.937	0.913	0.886	0.855	0.817	0.994135	8838/10000	7	0
UniValnordMG_2_bin.66	KnobheadnordMG_2	4.055	29.422	0	0	1	100857	94.5689	0.32	0.19	0.133	0.106	0.093	0.925467	1966/10000	2	0
UniValsudMG_2_bin.107	KnobheadnordMG_2	38.306	18.3	31	37	44	817294	99.995	1	1	1	1	1	0.999995	9999/10000	30	0
UniValsudMG_2_bin.109	KnobheadnordMG_2	0.061	4.574	0	0	0	420	0	0	0	0	0	0	0.806034	108/10000	5	2.03829e-103
UniValsudMG_2_bin.113	KnobheadnordMG_2	0.278	13.847	0	0	0	5152	90.7683	0.01	0.007	0.005	0.004	0.003	0.863886	463/10000	5	0
UniValsudMG_2_bin.125	KnobheadnordMG_2	6.937	39.981	2	6	9	230533	96.9933	0.817	0.786	0.742	0.681	0.606	0.966808	4922/10000	6	0
UniValsudMG_2_bin.127	KnobheadnordMG_2	0.005	0.291	0	0	0	191	0	0.001	0.001	0	0	0	0.770586	42/10000	1	2.86278e-25
UniValsudMG_2_bin.16	KnobheadnordMG_2	0.18	10.27	0	0	0	5521	0	0.002	0.002	0.002	0.002	0.002	0.829638	198/10000	4	9.72567e-239
UniValsudMG_2_bin.19	KnobheadnordMG_2	0.079	1.072	0	0	0	1648	90.2462	0.013	0.009	0.007	0.006	0.005	0.833991	221/10000	3	1.19417e-276
UniValsudMG_2_bin.26	KnobheadnordMG_2	62.189	25.67	54	67	77	1882985	99.3953	0.964	0.96	0.956	0.953	0.95	0.995944	9182/10000	56	0
UniValsudMG_2_bin.27	KnobheadnordMG_2	8.502	35.13	0	0	0	311874	93.24	0.133	0.123	0.117	0.114	0.111	0.904072	1203/10000	40	0
UniValsudMG_2_bin.44	KnobheadnordMG_2	3.325	20.81	0	0	0	71569	93.9369	0.106	0.093	0.084	0.077	0.072	0.897578	1034/10000	11	0
UniValsudMG_2_bin.59	KnobheadnordMG_2	1.879	29.291	0	0	0	37333	91.0844	0.044	0.034	0.029	0.027	0.025	0.883222	737/10000	7	0
UniValsudMG_2_bin.68	KnobheadnordMG_2	0.444	17.464	0	0	0	10439	90.8502	0.008	0.006	0.005	0.005	0.004	0.871597	558/10000	4	0
UniValsudMG_2_bin.71	KnobheadnordMG_2	0.431	8.297	0	0	0	8855	90.4431	0.017	0.012	0.009	0.007	0.007	0.864151	466/10000	4	0
UniValsudMG_2_bin.79	KnobheadnordMG_2	0.209	10.199	0	0	0	4667	0	0.003	0.002	0.002	0.002	0.002	0.859098	412/10000	3	0
BatPronordMG_2_bin.40	KnobheadsudMG_2	2.339	4.84	0	1	3	82031	96.7925	0.581	0.429	0.323	0.247	0.19	0.942602	2890/10000	2	0
BatPronordMG_2_bin.42	KnobheadsudMG_2	7.455	8.896	0	7	12	253822	96.0634	0.691	0.669	0.646	0.623	0.596	0.944385	3007/10000	11	0
ButProsudMG_2_bin.21	KnobheadsudMG_2	63.937	41.223	36	71	86	2211098	98.8702	0.964	0.952	0.942	0.932	0.924	0.995592	9114/10000	44	0
FingerMtnordMG_2_bin.101	KnobheadsudMG_2	0.328	1.528	0	0	0	9911	91.7793	0.089	0.061	0.044	0.033	0.025	0.878211	654/10000	5	0
FingerMtnordMG_2_bin.102	KnobheadsudMG_2	0.121	2.907	0	0	0	2675	91.1922	0.014	0.01	0.008	0.007	0.006	0.86424	467/10000	3	0
FingerMtnordMG_2_bin.103	KnobheadsudMG_2	1.095	8.914	0	0	0	10480	91.7822	0.088	0.061	0.048	0.04	0.036	0.897702	1037/10000	5	0
FingerMtnordMG_2_bin.104	KnobheadsudMG_2	0.222	2.328	0	0	0	5288	90.8104	0.032	0.023	0.018	0.015	0.013	0.871149	552/10000	4	0
FingerMtnordMG_2_bin.109	KnobheadsudMG_2	0.002	0.052	0	0	0	45	0	0.001	0	0	0	0	0.760672	32/10000	1	9.33523e-16
FingerMtnordMG_2_bin.118	KnobheadsudMG_2	0.131	1.191	0	0	0	3457	90.5878	0.032	0.021	0.015	0.012	0.009	0.854157	365/10000	7	0
FingerMtnordMG_2_bin.120	KnobheadsudMG_2	0.127	1.613	0	0	0	2357	90.1442	0.016	0.013	0.01	0.009	0.008	0.83985	256/10000	4	0
FingerMtnordMG_2_bin.121	KnobheadsudMG_2	30.593	60.851	0	24	43	1767463	96.2668	0.741	0.716	0.698	0.683	0.67	0.958543	4110/10000	22	0
FingerMtnordMG_2_bin.125	KnobheadsudMG_2	3.495	14.959	0	0	2	86061	95.098	0.344	0.266	0.215	0.183	0.158	0.915021	1549/10000	6	0
FingerMtnordMG_2_bin.130	KnobheadsudMG_2	1.215	2.782	0	0	1	33184	94.8076	0.27	0.211	0.168	0.133	0.105	0.880272	687/10000	9	0
FingerMtnordMG_2_bin.137	KnobheadsudMG_2	1.048	8.176	0	0	0	29990	92.2874	0.092	0.073	0.062	0.054	0.047	0.897496	1032/10000	5	0
FingerMtnordMG_2_bin.15	KnobheadsudMG_2	2.974	23.693	0	0	0	83989	92.7144	0.127	0.105	0.093	0.083	0.077	0.899361	1078/10000	9	0
FingerMtnordMG_2_bin.17	KnobheadsudMG_2	0.004	0.313	0	0	0	160	0	0	0	0	0	0	0.766923	38/10000	3	7.53152e-21
FingerMtnordMG_2_bin.18	KnobheadsudMG_2	0.005	0.322	0	0	0	240	0	0.001	0	0	0	0	0.777744	51/10000	3	3.31263e-33
FingerMtnordMG_2_bin.19	KnobheadsudMG_2	1.026	7.541	0	0	0	24924	92.4502	0.06	0.051	0.045	0.041	0.038	0.855039	373/10000	20	0
FingerMtnordMG_2_bin.22	KnobheadsudMG_2	0.049	2.357	0	0	0	1855	0	0.004	0.002	0.002	0.002	0.001	0.79364	78/10000	3	3.82216e-63
FingerMtnordMG_2_bin.24	KnobheadsudMG_2	0.042	1.116	0	0	0	1675	0	0.006	0.004	0.003	0.002	0.002	0.802313	98/10000	2	4.63352e-88
FingerMtnordMG_2_bin.29	KnobheadsudMG_2	0.398	3.468	0	0	0	11307	91.5212	0.049	0.037	0.03	0.025	0.021	0.874684	601/10000	4	0
FingerMtnordMG_2_bin.3	KnobheadsudMG_2	0.01	0.372	0	0	0	264	0	0.002	0.001	0.001	0.001	0.001	0.804217	103/10000	3	1.39038e-94
FingerMtnordMG_2_bin.31	KnobheadsudMG_2	0.191	4.45	0	0	0	4379	90.4843	0.012	0.008	0.006	0.005	0.004	0.859592	417/10000	4	0
FingerMtnordMG_2_bin.33	KnobheadsudMG_2	0.118	1.384	0	0	0	3448	90.2736	0.029	0.019	0.013	0.01	0.008	0.849074	322/10000	5	0
FingerMtnordMG_2_bin.35	KnobheadsudMG_2	0.238	0.624	0	0	0	6049	92.5941	0.172	0.048	0.012	0.004	0.001	0.914739	1539/10000	1	0
FingerMtnordMG_2_bin.38	KnobheadsudMG_2	0.414	6.845	0	0	0	10364	91.1612	0.017	0.014	0.012	0.011	0.01	0.832899	215/10000	4	3.68722e-262
FingerMtnordMG_2_bin.41	KnobheadsudMG_2	0.199	2.289	0	0	0	3812	90.1268	0.022	0.017	0.014	0.012	0.011	0.846352	301/10000	3	0
FingerMtnordMG_2_bin.53	KnobheadsudMG_2	5.012	16.135	0	0	3	155917	95.4624	0.339	0.3	0.271	0.246	0.227	0.915385	1562/10000	17	0
FingerMtnordMG_2_bin.57	KnobheadsudMG_2	2.603	24.416	0	0	0	78283	92.5678	0.137	0.095	0.076	0.066	0.06	0.896491	1008/10000	9	0
FingerMtnordMG_2_bin.58	KnobheadsudMG_2	2.869	5.914	0	0	3	48044	95.6318	0.39	0.33	0.285	0.249	0.217	0.908011	1318/10000	11	0
FingerMtnordMG_2_bin.61	KnobheadsudMG_2	0.506	10.773	0	0	0	13557	91.4615	0.127	0.042	0.015	0.009	0.006	0.890952	885/10000	1	0
FingerMtnordMG_2_bin.63	KnobheadsudMG_2	0.094	4.897	0	0	0	4248	0	0.004	0.003	0.002	0.002	0.002	0.853483	359/10000	4	0
FingerMtnordMG_2_bin.65	KnobheadsudMG_2	0.24	1.624	0	0	0	9432	91.3856	0.065	0.04	0.027	0.02	0.015	0.880758	695/10000	3	0
FingerMtnordMG_2_bin.66	KnobheadsudMG_2	1.034	3.955	0	0	0	45631	93.7296	0.191	0.146	0.116	0.094	0.077	0.907284	1296/10000	4	0
FingerMtnordMG_2_bin.70	KnobheadsudMG_2	0.603	4.303	0	0	0	19386	91.8063	0.057	0.044	0.038	0.034	0.03	0.88189	714/10000	7	0
FingerMtnordMG_2_bin.85	KnobheadsudMG_2	0.427	2.939	0	0	0	20883	92.1205	0.084	0.06	0.045	0.035	0.029	0.891948	906/10000	4	0
FingerMtnordMG_2_bin.86	KnobheadsudMG_2	0.093	2.868	0	0	0	4103	0	0.005	0.004	0.003	0.003	0.003	0.825221	177/10000	3	1.79022e-201
FingerMtnordMG_2_bin.89	KnobheadsudMG_2	0.1	1.868	0	0	0	2093	0	0.01	0.009	0.008	0.007	0.006	0.845677	296/10000	5	0
FingerMtnordMG_2_bin.9	KnobheadsudMG_2	0.763	2.583	0	0	0	33768	93.2778	0.154	0.116	0.09	0.072	0.059	0.903532	1188/10000	4	0
FingerMtnordMG_2_bin.94	KnobheadsudMG_2	0.589	4.36	0	0	0	13562	91.6604	0.069	0.051	0.041	0.035	0.031	0.882066	717/10000	5	0
FingerMtnordMG_2_bin.96	KnobheadsudMG_2	0.453	3.882	0	0	0	8826	91.0542	0.043	0.034	0.028	0.024	0.021	0.875029	606/10000	6	0
FingerMtnordMG_2_bin.98	KnobheadsudMG_2	0.235	3.7	0	0	0	4244	90.2745	0.023	0.014	0.01	0.009	0.008	0.87496	605/10000	3	0
FingerMtnordMG_2_bin.99	KnobheadsudMG_2	0.178	4.044	0	0	0	6091	90.7981	0.04	0.023	0.014	0.01	0.007	0.859592	417/10000	3	0
FingerMtsudMG_2_bin.2	KnobheadsudMG_2	15.08	27.031	0	4	27	774217	95.9553	0.602	0.561	0.532	0.511	0.492	0.939222	2680/10000	22	0
FingerMtsudMG_2_bin.24	KnobheadsudMG_2	0.933	12.699	0	0	0	20765	91.5013	0.054	0.041	0.034	0.029	0.025	0.895937	995/10000	5	0
FingerMtsudMG_2_bin.25	KnobheadsudMG_2	0.456	8.664	0	0	0	9323	91.5244	0.026	0.021	0.017	0.015	0.014	0.830624	203/10000	16	1.19915e-242
FingerMtsudMG_2_bin.3	KnobheadsudMG_2	1.035	9.033	0	0	0	34675	92.0847	0.05	0.041	0.037	0.034	0.032	0.842131	271/10000	14	0
FingerMtsudMG_2_bin.49	KnobheadsudMG_2	1.8	17.508	0	0	0	51875	91.805	0.075	0.061	0.053	0.048	0.043	0.89733	1028/10000	7	0
FingerMtsudMG_2_bin.5	KnobheadsudMG_2	0.524	4.795	0	0	0	10984	92.4953	0.136	0.096	0.069	0.05	0.036	0.864415	469/10000	9	0
FingerMtsudMG_2_bin.50	KnobheadsudMG_2	0.149	2.348	0	0	0	2784	89.4582	0.015	0.011	0.009	0.008	0.007	0.838258	246/10000	4	0
FingerMtsudMG_2_bin.66	KnobheadsudMG_2	0.153	1.174	0	0	0	2813	91.1082	0.038	0.025	0.019	0.014	0.011	0.853596	360/10000	6	0
FingerMtsudMG_2_bin.74	KnobheadsudMG_2	0.973	6.523	0	0	0	22852	92.1387	0.083	0.065	0.054	0.047	0.042	0.888285	831/10000	5	0
FingerMtsudMG_2_bin.9	KnobheadsudMG_2	33.244	77.961	0	10	52	1916108	95.7614	0.588	0.573	0.562	0.552	0.543	0.932389	2299/10000	46	0
KnobheadnordMG_2_bin.23	KnobheadsudMG_2	5.3	21.185	0	0	1	157016	93.5764	0.261	0.215	0.189	0.173	0.161	0.924653	1930/10000	7	0
KnobheadnordMG_2_bin.34	KnobheadsudMG_2	0.309	1.919	0	0	0	8389	91.7143	0.083	0.055	0.039	0.028	0.021	0.882532	725/10000	5	0
KnobheadnordMG_2_bin.72	KnobheadsudMG_2	2.106	17.843	0	0	0	48904	92.7127	0.162	0.113	0.091	0.079	0.07	0.900032	1095/10000	8	0
KnobheadsudMG_2_bin.2	KnobheadsudMG_2	23.418	13.235	18	22	27	587358	99.9706	1	0.999	0.998	0.997	0.995	1	10000/10000	18	0
KnobheadsudMG_2_bin.4	KnobheadsudMG_2	73.696	71.15	63	71	80	1533381	99.9991	1	1	1	1	1	1	10000/10000	61	0
KnobheadsudMG_2_bin.48	KnobheadsudMG_2	14.029	6.151	10	13	17	398215	99.9978	1	0.999	0.996	0.992	0.984	1	10000/10000	11	0
KnobheadsudMG_2_bin.80	KnobheadsudMG_2	57.039	55.517	29	43	77	2497362	99.9589	1	1	1	0.999	0.999	1	10000/10000	27	0
LinTernordMG_2_bin.2	KnobheadsudMG_2	6.07	14.446	1	5	8	187023	97.6868	0.782	0.746	0.69	0.614	0.523	0.974234	5780/10000	5	0
LinTernordMG_2_bin.21	KnobheadsudMG_2	12.948	54.614	0	0	7	746734	95.6431	0.395	0.354	0.326	0.304	0.285	0.927227	2046/10000	18	0
LinTernordMG_2_bin.22	KnobheadsudMG_2	1.633	19.516	0	0	0	48864	91.709	0.065	0.05	0.042	0.037	0.034	0.88305	734/10000	6	0
LinTernordMG_2_bin.4	KnobheadsudMG_2	0.701	5.949	0	0	0	19942	91.6569	0.061	0.044	0.036	0.031	0.027	0.877955	650/10000	5	0
LinTernordMG_2_bin.44	KnobheadsudMG_2	0.634	7.515	0	0	0	17004	91.4138	0.063	0.038	0.025	0.02	0.016	0.894852	970/10000	4	0
LinTernordMG_2_bin.8	KnobheadsudMG_2	5.204	14.604	0	1	5	164100	96.3909	0.538	0.405	0.327	0.282	0.251	0.948767	3314/10000	2	0
MtNewZealnordMG_2_bin.1	KnobheadsudMG_2	2.518	7.548	0	0	2	54592	95.0351	0.315	0.266	0.229	0.2	0.174	0.902284	1154/10000	11	0
MtNewZealnordMG_2_bin.10	KnobheadsudMG_2	0.458	3.759	0	0	0	16987	92.2845	0.097	0.058	0.038	0.029	0.022	0.888183	829/10000	3	0
MtNewZealnordMG_2_bin.105	KnobheadsudMG_2	0.626	10.417	0	0	0	14816	91.1067	0.016	0.013	0.012	0.011	0.01	0.827172	186/10000	7	1.51169e-215
MtNewZealnordMG_2_bin.16	KnobheadsudMG_2	0.336	4.489	0	0	0	9496	91.726	0.076	0.052	0.037	0.027	0.021	0.879285	671/10000	5	0
MtNewZealnordMG_2_bin.19	KnobheadsudMG_2	0.724	10.169	0	0	0	17242	90.9067	0.028	0.022	0.019	0.017	0.016	0.84767	311/10000	6	0
MtNewZealnordMG_2_bin.25	KnobheadsudMG_2	6.155	43.723	0	0	0	205685	93.1702	0.2	0.152	0.13	0.117	0.108	0.904888	1226/10000	8	0
MtNewZealnordMG_2_bin.27	KnobheadsudMG_2	1.356	8.064	0	0	0	51327	93.7425	0.097	0.079	0.068	0.06	0.055	0.898153	1048/10000	5	0
MtNewZealnordMG_2_bin.7	KnobheadsudMG_2	5.753	8.538	0	4	10	167819	96.5189	0.656	0.615	0.576	0.535	0.492	0.917751	1649/10000	11	0
MtNewZealnordMG_2_bin.74	KnobheadsudMG_2	4.56	3.86	2	4	6	191023	98.9579	0.91	0.817	0.687	0.545	0.414	0.989683	8043/10000	3	0
MtNewZealnordMG_2_bin.9	KnobheadsudMG_2	0.351	11.419	0	0	0	5522	0	0.008	0.006	0.005	0.005	0.004	0.853028	355/10000	4	0
PudButnordMG_2_bin.11	KnobheadsudMG_2	3.926	2.974	2	4	5	135004	99.673	0.948	0.834	0.674	0.502	0.349	0.996422	9275/10000	3	0
PudButnordMG_2_bin.13	KnobheadsudMG_2	7.581	4.199	5	7	10	237818	99.929	0.992	0.969	0.923	0.854	0.767	0.999189	9831/10000	5	0
PudButnordMG_2_bin.2	KnobheadsudMG_2	4.423	5.79	2	3	5	88774	99.4464	0.926	0.79	0.627	0.469	0.334	0.994769	8957/10000	3	0
PudButnordMG_2_bin.22	KnobheadsudMG_2	5.196	4.539	2	4	7	278799	99.6583	0.949	0.855	0.729	0.596	0.472	0.996151	9222/10000	3	0
PudButnordMG_2_bin.3	KnobheadsudMG_2	15.209	50.837	6	9	14	869065	99.9023	0.996	0.985	0.961	0.922	0.867	0.999656	9928/10000	7	0
PudButnordMG_2_bin.36	KnobheadsudMG_2	19.149	7.088	15	19	23	691333	99.9616	1	0.999	0.998	0.996	0.993	0.999981	9996/10000	15	0
PudButnordMG_2_bin.42	KnobheadsudMG_2	7.828	4.265	5	7	10	287622	99.9363	0.994	0.977	0.938	0.874	0.787	0.999324	9859/10000	5	0
PudButnordMG_2_bin.5	KnobheadsudMG_2	5.865	7.963	2	4	7	81702	99.55	0.936	0.817	0.673	0.532	0.411	0.995143	9028/10000	3	0
PudButnordMG_2_bin.53	KnobheadsudMG_2	2.736	2.419	1	2	4	84805	99.2708	0.858	0.654	0.454	0.294	0.182	0.99145	8350/10000	2	0
PudButnordMG_2_bin.56	KnobheadsudMG_2	4.866	4.889	2	4	6	210268	99.719	0.96	0.87	0.739	0.593	0.453	0.996274	9246/10000	3	0
PudButnordMG_2_bin.59	KnobheadsudMG_2	6.331	4.112	3	6	9	159960	99.6922	0.969	0.907	0.819	0.718	0.615	0.996662	9322/10000	4	0
PudButnordMG_2_bin.60	KnobheadsudMG_2	3.955	2.726	2	4	5	161438	99.7089	0.951	0.839	0.679	0.507	0.354	0.996734	9336/10000	3	0
PudButnordMG_2_bin.67	KnobheadsudMG_2	7.633	4.447	5	7	10	205021	99.9595	0.996	0.98	0.947	0.889	0.804	0.999656	9928/10000	6	0
PudButnordMG_2_bin.81	KnobheadsudMG_2	6.195	9.158	3	5	7	160830	99.8227	0.973	0.915	0.82	0.699	0.569	0.998443	9678/10000	4	0
PudButnordMG_2_bin.85	KnobheadsudMG_2	23.525	19.878	14	19	25	721744	99.9856	1	1	1	0.999	0.998	1	10000/10000	15	0
PudButnordMG_2_bin.88	KnobheadsudMG_2	32.682	12.281	25	31	37	803640	99.9995	1	1	1	1	1	1	10000/10000	25	0
PudButnordMG_2_bin.90	KnobheadsudMG_2	29.102	60.434	17	21	28	1511473	99.9807	1	0.999	0.999	0.997	0.995	1	10000/10000	17	0
PudButnordMG_2_bin.95	KnobheadsudMG_2	7.217	5.798	4	6	9	350070	99.9468	0.992	0.968	0.916	0.835	0.732	0.999334	9861/10000	6	0
PudButsudMG_2_bin.15	KnobheadsudMG_2	30.036	12.835	23	28	34	818484	99.9987	1	1	1	1	1	1	10000/10000	23	0
PudButsudMG_2_bin.38	KnobheadsudMG_2	13.181	10.387	9	12	16	417508	99.9967	1	0.999	0.997	0.991	0.98	0.99999	9998/10000	11	0
PudButsudMG_2_bin.44	KnobheadsudMG_2	7.35	4.32	5	7	9	259398	99.9661	0.995	0.978	0.94	0.873	0.78	0.99957	9910/10000	6	0
PudButsudMG_2_bin.46	KnobheadsudMG_2	11.285	4.455	8	11	14	306323	99.9961	0.999	0.998	0.993	0.981	0.959	0.999957	9991/10000	9	0
PudButsudMG_2_bin.57	KnobheadsudMG_2	30.843	60.115	23	28	34	737621	99.8771	0.999	0.998	0.997	0.996	0.994	0.99999	9998/10000	24	0
PudButsudMG_2_bin.59	KnobheadsudMG_2	76.417	52.966	55	68	85	4599609	99.9919	1	1	1	1	1	1	10000/10000	53	0
PudButsudMG_2_bin.62	KnobheadsudMG_2	22.514	10.932	17	21	26	798224	99.9922	1	0.999	0.999	0.998	0.997	0.999995	9999/10000	18	0
PudButsudMG_2_bin.78	KnobheadsudMG_2	22.654	14.318	17	21	26	562675	99.9974	1	1	1	0.999	0.999	0.999995	9999/10000	18	0
RickerHillsnord_2_bin.11	KnobheadsudMG_2	0.691	1.099	0	0	1	19115	94.9246	0.399	0.176	0.068	0.027	0.011	0.931017	2229/10000	1	0
RickerHillsnord_2_bin.17	KnobheadsudMG_2	28.656	17.06	20	31	39	613952	98.373	0.89	0.88	0.872	0.868	0.865	0.987832	7733/10000	25	0
RickerHillsnord_2_bin.19	KnobheadsudMG_2	13.846	12.001	10	13	17	272788	98.953	0.931	0.928	0.925	0.921	0.914	0.990225	8136/10000	12	0
RickerHillsnord_2_bin.23	KnobheadsudMG_2	1.785	17.021	0	0	1	56851	94.184	0.253	0.174	0.124	0.091	0.068	0.904958	1228/10000	4	0
RickerHillsnord_2_bin.25	KnobheadsudMG_2	14.026	8.181	9	14	18	487551	98.9159	0.978	0.964	0.946	0.925	0.902	0.998038	9596/10000	10	0
RickerHillsnord_2_bin.26	KnobheadsudMG_2	2.21	9.558	0	0	1	51207	94.7821	0.352	0.188	0.122	0.096	0.082	0.94452	3016/10000	2	0
RickerHillsnord_2_bin.29	KnobheadsudMG_2	37.115	19.053	30	39	47	594718	98.8432	0.933	0.923	0.917	0.911	0.907	0.993238	8672/10000	31	0
RickerHillsnord_2_bin.30	KnobheadsudMG_2	36.458	21.215	28	38	46	813594	99.1599	0.956	0.949	0.944	0.941	0.938	0.996581	9306/10000	25	0
RickerHillsnord_2_bin.32	KnobheadsudMG_2	3.612	14.38	1	2	4	100383	98.8272	0.811	0.59	0.399	0.26	0.169	0.9847	7234/10000	2	0
RickerHillsnord_2_bin.34	KnobheadsudMG_2	7.504	19.908	0	1	5	449988	95.8892	0.504	0.386	0.319	0.282	0.256	0.954922	3796/10000	4	0
RickerHillsnord_2_bin.36	KnobheadsudMG_2	3.664	14.678	0	0	0	144718	93.3865	0.207	0.161	0.136	0.121	0.111	0.919134	1702/10000	8	0
RickerHillsnord_2_bin.37	KnobheadsudMG_2	3.409	10.867	0	2	3	84456	97.5956	0.733	0.535	0.362	0.236	0.155	0.974322	5791/10000	2	0
RickerHillsnord_2_bin.48	KnobheadsudMG_2	2.275	28.625	0	0	0	57586	91.8205	0.075	0.063	0.055	0.05	0.046	0.899757	1088/10000	13	0
RickerHillsnord_2_bin.50	KnobheadsudMG_2	9.129	10.798	1	5	15	188607	98.4251	0.817	0.715	0.628	0.563	0.513	0.982688	6930/10000	3	0
RickerHillsnord_2_bin.54	KnobheadsudMG_2	43.037	59.528	29	40	50	1501435	99.8184	0.986	0.984	0.983	0.981	0.979	0.999004	9793/10000	22	0
RickerHillsnord_2_bin.55	KnobheadsudMG_2	1.941	10.923	0	0	0	58086	93.0953	0.144	0.109	0.089	0.078	0.069	0.909938	1378/10000	5	0
RickerHillsnord_2_bin.63	KnobheadsudMG_2	0.531	2.382	0	0	0	21033	92.2075	0.117	0.082	0.064	0.05	0.041	0.873204	580/10000	4	0
RickerHillsnord_2_bin.8	KnobheadsudMG_2	0.507	0.966	0	0	1	12421	94.2276	0.305	0.125	0.047	0.018	0.007	0.906848	1283/10000	1	0
RicNunsandstonMG_3_bin.1	KnobheadsudMG_2	0.777	6.801	0	0	0	12032	0	0.033	0.029	0.027	0.025	0.023	0.879781	679/10000	7	0
RicNunsandstonMG_3_bin.11	KnobheadsudMG_2	0.203	1.29	0	0	0	8118	91.307	0.055	0.037	0.027	0.019	0.015	0.864939	475/10000	4	0
RicNunsandstonMG_3_bin.12	KnobheadsudMG_2	30.977	38.232	0	18	57	758702	95.699	0.645	0.631	0.62	0.611	0.602	0.93204	2281/10000	48	0
RicNunsandstonMG_3_bin.13	KnobheadsudMG_2	0.371	7.285	0	0	0	3354	0	0.015	0.012	0.011	0.01	0.009	0.838742	249/10000	5	0
RicNunsandstonMG_3_bin.19	KnobheadsudMG_2	0.326	4.888	0	0	0	8620	90.4268	0.021	0.018	0.015	0.014	0.012	0.844294	286/10000	5	0
RicNunsandstonMG_3_bin.21	KnobheadsudMG_2	0.949	8.851	0	0	0	22992	90.9655	0.031	0.028	0.025	0.024	0.022	0.86244	447/10000	5	0
RicNunsandstonMG_3_bin.25	KnobheadsudMG_2	1.87	8.681	0	0	0	54386	92.9681	0.178	0.123	0.098	0.086	0.077	0.902022	1147/10000	6	0
RicNunsandstonMG_3_bin.26	KnobheadsudMG_2	0.277	5.515	0	0	0	3786	0	0.015	0.012	0.01	0.009	0.009	0.855039	373/10000	6	0
RicNunsandstonMG_3_bin.35	KnobheadsudMG_2	0.001	0.096	0	0	0	35	0	0	0	0	0	0	0.763925	35/10000	2	3.00809e-18
RicNunsandstonMG_3_bin.43	KnobheadsudMG_2	2.238	10.264	0	0	0	47337	93.281	0.178	0.151	0.132	0.119	0.108	0.898519	1057/10000	13	0
RicNunsandstonMG_3_bin.47	KnobheadsudMG_2	0.049	0.87	0	0	0	814	0	0.007	0.005	0.004	0.004	0.003	0.858498	406/10000	3	0
RicNunsandstonMG_3_bin.48	KnobheadsudMG_2	9.176	52.634	0	0	4	374554	95.0542	0.335	0.299	0.274	0.254	0.236	0.913795	1506/10000	18	0
RicNunsandstonMG_3_bin.58	KnobheadsudMG_2	0.1	0.833	0	0	0	2024	90.2841	0.028	0.019	0.013	0.009	0.007	0.853934	363/10000	6	0
RicNunsandstonMG_3_bin.62	KnobheadsudMG_2	0.128	1.99	0	0	0	3121	0	0.01	0.008	0.008	0.007	0.006	0.833083	216/10000	8	8.45415e-264
RicNunsandstonMG_3_bin.63	KnobheadsudMG_2	0.326	3.922	0	0	0	6806	90.4587	0.024	0.02	0.017	0.015	0.013	0.843728	282/10000	3	0
RicNunsandstonMG_3_bin.67	KnobheadsudMG_2	0.001	0.048	0	0	0	46	0	0.001	0	0	0	0	0.765949	37/10000	1	5.69705e-20
RicNunsandstonMG_3_bin.7	KnobheadsudMG_2	0.035	4.373	0	0	0	1000	0	0.003	0.001	0.001	0	0	0.773932	46/10000	2	2.91144e-28
RicNunsandstonMG_3_bin.70	KnobheadsudMG_2	3.783	12.569	0	0	0	92842	94.4045	0.232	0.205	0.187	0.172	0.159	0.888488	835/10000	21	0
RicNunsandstonMG_3_bin.74	KnobheadsudMG_2	1.077	10.386	0	0	0	28375	92.2855	0.111	0.066	0.046	0.037	0.032	0.892368	915/10000	3	0
RicNunsandstonMG_3_bin.78	KnobheadsudMG_2	9.925	62.18	0	0	3	435767	94.9395	0.333	0.296	0.269	0.249	0.232	0.915885	1580/10000	18	0
RicNunsandstonMG_3_bin.85	KnobheadsudMG_2	0.002	0.246	0	0	0	76	0	0	0	0	0	0	0.762871	34/10000	4	2.09667e-17
RicNunsandstonMG_3_bin.86	KnobheadsudMG_2	1.198	28.78	0	0	0	28629	90.8484	0.023	0.019	0.018	0.017	0.016	0.834527	224/10000	6	5.45768e-277
RicNunsandstonMG_3_bin.88	KnobheadsudMG_2	1.13	2.725	0	0	1	42787	94.6958	0.275	0.208	0.159	0.123	0.094	0.899282	1076/10000	5	0
RicNunsandstonMG_3_bin.89	KnobheadsudMG_2	0.491	9.981	0	0	0	16441	91.3787	0.021	0.016	0.013	0.012	0.01	0.872554	571/10000	5	0
RicNunsandstonMG_3_bin.90	KnobheadsudMG_2	0.004	0.261	0	0	0	79	0	0.001	0	0	0	0	0.767872	39/10000	2	9.70242e-22
RicNunsandstonMG_3_bin.91	KnobheadsudMG_2	1.401	5.339	0	0	1	60902	94.3718	0.251	0.192	0.153	0.125	0.103	0.914682	1537/10000	4	0
RicNunsandstonMG_3_bin.93	KnobheadsudMG_2	0.268	1.93	0	0	0	9705	91.7571	0.07	0.042	0.027	0.019	0.014	0.881238	703/10000	2	0
RicNunsandstonMG_3_bin.94	KnobheadsudMG_2	0.656	5.909	0	0	0	16637	91.4502	0.054	0.042	0.036	0.031	0.027	0.887255	811/10000	8	0
RicNunsandstonMG_3_bin.95	KnobheadsudMG_2	0	0.01	0	0	0	2	0	0	0	0	0	0	0.73131	14/10000	1	0.000777253
RicNunsandstonMG_4_bin.33	KnobheadsudMG_2	2.87	4.393	0	2	4	99431	97.1184	0.715	0.558	0.408	0.285	0.196	0.963247	4555/10000	3	0
RicNunsandstonMG_4_bin.58	KnobheadsudMG_2	0.816	4.234	0	0	1	24179	94.9883	0.297	0.134	0.064	0.039	0.027	0.940765	2774/10000	1	0
RicNunsandstonMG_4_bin.63	KnobheadsudMG_2	0.624	5.023	0	0	0	12656	93.0168	0.155	0.111	0.082	0.06	0.045	0.869385	529/10000	9	0
RicNunsandstonMG_4_bin.75	KnobheadsudMG_2	0.186	2.369	0	0	0	3193	90.8628	0.027	0.02	0.016	0.013	0.011	0.870771	547/10000	5	0
RicNunsandstonMG_4_bin.86	KnobheadsudMG_2	0.807	10.95	0	0	0	14884	91.452	0.053	0.041	0.033	0.029	0.026	0.885826	784/10000	6	0
RicNunsandstonMG_4_bin.87	KnobheadsudMG_2	2.985	28.146	0	0	0	79597	92.598	0.098	0.08	0.069	0.062	0.057	0.898479	1056/10000	10	0
RicNunsandstonMG_4_bin.94	KnobheadsudMG_2	4.435	9.89	1	3	6	232043	97.7898	0.765	0.663	0.555	0.452	0.361	0.973976	5748/10000	3	0
SiePeanordMG_2_bin.15	KnobheadsudMG_2	9.065	44.91	0	0	6	380023	95.567	0.392	0.348	0.316	0.29	0.269	0.915663	1572/10000	17	0
SiePeanordMG_2_bin.16	KnobheadsudMG_2	5.554	4.759	2	5	8	161469	97.3234	0.824	0.764	0.694	0.617	0.538	0.962455	4477/10000	4	0
SiePeanordMG_2_bin.21	KnobheadsudMG_2	0.43	9.164	0	0	0	10481	90.3265	0.025	0.016	0.012	0.01	0.009	0.872844	575/10000	3	0
SiePeanordMG_2_bin.24	KnobheadsudMG_2	0.802	2.02	0	0	0	24960	93.9908	0.221	0.161	0.119	0.088	0.065	0.88305	734/10000	6	0
SiePeanordMG_2_bin.38	KnobheadsudMG_2	0.05	0.49	0	0	0	1474	90.2467	0.025	0.011	0.005	0.003	0.002	0.849074	322/10000	2	0
SiePeanordMG_2_bin.41	KnobheadsudMG_2	3.229	14.304	0	0	1	98787	93.7132	0.27	0.198	0.156	0.132	0.115	0.926333	2005/10000	4	0
SiePeanordMG_2_bin.44	KnobheadsudMG_2	1.349	10.853	0	0	0	34313	91.7487	0.083	0.061	0.05	0.044	0.039	0.899836	1090/10000	5	0
SiePeanordMG_2_bin.53	KnobheadsudMG_2	0.621	6.511	0	0	0	16710	91.5161	0.049	0.036	0.03	0.025	0.022	0.886994	806/10000	5	0
SiePeanordMG_2_bin.56	KnobheadsudMG_2	3.661	6.819	1	3	4	96666	99.1615	0.875	0.7	0.51	0.351	0.233	0.990675	8214/10000	2	0
SiePeanordMG_2_bin.60	KnobheadsudMG_2	8.969	20.495	0	0	11	256830	95.595	0.452	0.411	0.383	0.36	0.342	0.922648	1844/10000	17	0
SiePeanordMG_2_bin.70	KnobheadsudMG_2	1.514	13.394	0	0	0	41851	93.8128	0.113	0.089	0.075	0.066	0.059	0.899162	1073/10000	5	0
SiePeanordMG_2_bin.71	KnobheadsudMG_2	0.042	0.312	0	0	0	711	89.6275	0.025	0.01	0.004	0.002	0.001	0.855148	374/10000	2	0
SiePeanordMG_2_bin.9	KnobheadsudMG_2	21.833	26.397	5	19	30	738119	96.2384	0.809	0.788	0.774	0.762	0.752	0.963758	4606/10000	19	0
SiePeasudMG_2_bin.1	KnobheadsudMG_2	0.491	4.772	0	0	0	11821	91.6281	0.033	0.026	0.022	0.019	0.017	0.880394	689/10000	7	0
SiePeasudMG_2_bin.102	KnobheadsudMG_2	0.283	8.517	0	0	0	6734	90.6501	0.029	0.013	0.008	0.006	0.004	0.867872	510/10000	3	0
SiePeasudMG_2_bin.103	KnobheadsudMG_2	0.273	2.543	0	0	0	5336	90.7714	0.036	0.027	0.021	0.017	0.015	0.873774	588/10000	5	0
SiePeasudMG_2_bin.105	KnobheadsudMG_2	0.122	3.995	0	0	0	4463	0	0.004	0.003	0.002	0.002	0.002	0.842864	276/10000	3	0
SiePeasudMG_2_bin.106	KnobheadsudMG_2	0.477	4.959	0	0	0	12248	91.3052	0.047	0.032	0.025	0.021	0.018	0.872772	574/10000	4	0
SiePeasudMG_2_bin.11	KnobheadsudMG_2	0.337	3.926	0	0	0	4216	91.2563	0.046	0.03	0.022	0.017	0.014	0.887773	821/10000	4	0
SiePeasudMG_2_bin.112	KnobheadsudMG_2	0.034	1.068	0	0	0	1093	90.2547	0.006	0.003	0.003	0.002	0.002	0.830624	203/10000	3	1.19915e-242
SiePeasudMG_2_bin.114	KnobheadsudMG_2	0.128	0.728	0	0	0	3605	91.092	0.063	0.029	0.014	0.008	0.004	0.866472	493/10000	2	0
SiePeasudMG_2_bin.118	KnobheadsudMG_2	0.64	5.366	0	0	0	16870	91.7281	0.056	0.042	0.035	0.03	0.027	0.885933	786/10000	4	0
SiePeasudMG_2_bin.12	KnobheadsudMG_2	0.066	0.677	0	0	0	1805	89.7414	0.038	0.011	0.004	0.002	0.001	0.863078	454/10000	1	0
SiePeasudMG_2_bin.121	KnobheadsudMG_2	0.602	1.237	0	0	1	20581	94.618	0.327	0.146	0.06	0.026	0.013	0.925378	1962/10000	1	0
SiePeasudMG_2_bin.16	KnobheadsudMG_2	0.083	2.133	0	0	0	1733	90.3137	0.009	0.005	0.004	0.003	0.003	0.85337	358/10000	4	0
SiePeasudMG_2_bin.2	KnobheadsudMG_2	1.556	16.491	0	0	0	31663	92.3815	0.119	0.075	0.053	0.042	0.036	0.898641	1060/10000	4	0
SiePeasudMG_2_bin.22	KnobheadsudMG_2	2.607	2.928	0	2	4	112432	96.6488	0.678	0.569	0.442	0.319	0.216	0.950887	3473/10000	3	0
SiePeasudMG_2_bin.25	KnobheadsudMG_2	0.05	2.156	0	0	0	946	0	0.002	0.001	0.001	0.001	0.001	0.810409	121/10000	4	6.5679e-119
SiePeasudMG_2_bin.29	KnobheadsudMG_2	0.55	1.129	0	0	1	13872	94.3068	0.278	0.142	0.069	0.033	0.015	0.901115	1123/10000	2	0
SiePeasudMG_2_bin.3	KnobheadsudMG_2	0.418	4.372	0	0	0	9078	91.2601	0.039	0.028	0.022	0.019	0.017	0.88259	726/10000	6	0
SiePeasudMG_2_bin.31	KnobheadsudMG_2	0.792	5.222	0	0	0	15961	91.6898	0.086	0.063	0.05	0.043	0.037	0.894852	970/10000	4	0
SiePeasudMG_2_bin.35	KnobheadsudMG_2	0.371	3.6	0	0	0	10225	90.6035	0.032	0.025	0.02	0.018	0.016	0.888438	834/10000	6	0
SiePeasudMG_2_bin.36	KnobheadsudMG_2	0.238	1.267	0	0	0	8866	91.7597	0.097	0.042	0.022	0.014	0.011	0.860562	427/10000	2	0
SiePeasudMG_2_bin.38	KnobheadsudMG_2	0.473	4.839	0	0	0	9815	91.152	0.041	0.031	0.025	0.022	0.019	0.87972	678/10000	5	0
SiePeasudMG_2_bin.40	KnobheadsudMG_2	0.882	3.316	0	0	0	48693	93.2962	0.167	0.123	0.095	0.075	0.061	0.902209	1152/10000	4	0
SiePeasudMG_2_bin.41	KnobheadsudMG_2	0.001	0.033	0	0	0	26	0	0.001	0	0	0	0	0.816333	141/10000	3	2.6109e-147
SiePeasudMG_2_bin.44	KnobheadsudMG_2	0.148	3.636	0	0	0	3633	89.9666	0.012	0.007	0.004	0.004	0.003	0.865025	476/10000	4	0
SiePeasudMG_2_bin.47	KnobheadsudMG_2	0.013	0.718	0	0	0	377	0	0.002	0.001	0.001	0.001	0.001	0.837273	240/10000	3	9.57609e-304
SiePeasudMG_2_bin.50	KnobheadsudMG_2	0.302	7.964	0	0	0	10481	90.6944	0.036	0.021	0.015	0.011	0.009	0.866806	497/10000	3	0
SiePeasudMG_2_bin.51	KnobheadsudMG_2	0.479	5.595	0	0	0	13782	91.0908	0.033	0.024	0.02	0.017	0.015	0.883279	738/10000	5	0
SiePeasudMG_2_bin.52	KnobheadsudMG_2	0.028	0.585	0	0	0	762	0	0.006	0.004	0.003	0.002	0.002	0.856011	382/10000	4	0
SiePeasudMG_2_bin.55	KnobheadsudMG_2	0.03	3.65	0	0	0	704	0	0.002	0	0	0	0	0.773932	46/10000	1	2.91144e-28
SiePeasudMG_2_bin.56	KnobheadsudMG_2	0.064	2.59	0	0	0	2030	0	0.004	0.003	0.002	0.001	0.001	0.835405	229/10000	3	2.68304e-285
SiePeasudMG_2_bin.58	KnobheadsudMG_2	0.404	3.389	0	0	0	7009	90.7539	0.031	0.025	0.023	0.021	0.019	0.880516	691/10000	7	0
SiePeasudMG_2_bin.59	KnobheadsudMG_2	0.779	9.552	0	0	0	15671	91.2773	0.041	0.034	0.029	0.026	0.024	0.883336	739/10000	6	0
SiePeasudMG_2_bin.62	KnobheadsudMG_2	4.911	3.962	2	5	7	208895	98.0802	0.856	0.787	0.706	0.61	0.504	0.983172	7002/10000	4	0
SiePeasudMG_2_bin.63	KnobheadsudMG_2	0.431	5.061	0	0	0	7698	90.7294	0.041	0.028	0.022	0.018	0.015	0.876049	621/10000	4	0
SiePeasudMG_2_bin.64	KnobheadsudMG_2	1.296	15.655	0	0	0	29288	91.6885	0.058	0.043	0.036	0.031	0.028	0.890179	869/10000	5	0
SiePeasudMG_2_bin.65	KnobheadsudMG_2	0.424	7.475	0	0	0	9002	91.0063	0.033	0.024	0.019	0.016	0.014	0.86915	526/10000	5	0
SiePeasudMG_2_bin.67	KnobheadsudMG_2	0.072	1.505	0	0	0	2897	89.941	0.017	0.011	0.008	0.006	0.004	0.860658	428/10000	4	0
SiePeasudMG_2_bin.68	KnobheadsudMG_2	1.295	8.762	0	0	0	32768	92.4074	0.092	0.074	0.064	0.056	0.051	0.909686	1370/10000	5	0
SiePeasudMG_2_bin.69	KnobheadsudMG_2	0.232	2.565	0	0	0	6799	91.1494	0.056	0.038	0.027	0.02	0.015	0.875914	619/10000	4	0
SiePeasudMG_2_bin.7	KnobheadsudMG_2	0.044	1.476	0	0	0	703	0	0.002	0.001	0.001	0.001	0.001	0.85175	344/10000	3	0
SiePeasudMG_2_bin.71	KnobheadsudMG_2	0.285	8.462	0	0	0	7357	90.2107	0.009	0.006	0.005	0.004	0.004	0.873204	580/10000	4	0
SiePeasudMG_2_bin.73	KnobheadsudMG_2	2.789	4.4	0	1	4	137798	96.6532	0.535	0.443	0.365	0.299	0.242	0.937936	2604/10000	4	0
SiePeasudMG_2_bin.74	KnobheadsudMG_2	0.083	0.452	0	0	0	1892	90.7299	0.049	0.019	0.008	0.004	0.002	0.86037	425/10000	2	0
SiePeasudMG_2_bin.76	KnobheadsudMG_2	0.001	0.051	0	0	0	17	0	0	0	0	0	0	0.807087	111/10000	4	3.07874e-105
SiePeasudMG_2_bin.77	KnobheadsudMG_2	0.105	1.99	0	0	0	866	0	0.012	0.007	0.006	0.005	0.004	0.874336	596/10000	4	0
SiePeasudMG_2_bin.79	KnobheadsudMG_2	0.001	0.039	0	0	0	43	0	0.001	0	0	0	0	0.77145	43/10000	1	2.08879e-25
SiePeasudMG_2_bin.8	KnobheadsudMG_2	0.179	2.797	0	0	0	3022	89.5285	0.026	0.015	0.011	0.009	0.008	0.861511	437/10000	5	0
SiePeasudMG_2_bin.82	KnobheadsudMG_2	0.012	0.684	0	0	0	391	0	0.002	0.001	0.001	0.001	0	0.847929	313/10000	3	0
SiePeasudMG_2_bin.83	KnobheadsudMG_2	0.001	0.032	0	0	0	22	0	0.001	0	0	0	0	0.823637	170/10000	3	1.14799e-190
SiePeasudMG_2_bin.84	KnobheadsudMG_2	0.288	1.611	0	0	0	12919	91.4882	0.074	0.046	0.033	0.025	0.019	0.860944	431/10000	3	0
SiePeasudMG_2_bin.85	KnobheadsudMG_2	1.202	6.419	0	0	1	20662	94.4867	0.365	0.169	0.082	0.049	0.034	0.938601	2643/10000	2	0
SiePeasudMG_2_bin.86	KnobheadsudMG_2	1.14	8.71	0	0	0	29078	92.686	0.102	0.072	0.055	0.046	0.039	0.903169	1178/10000	4	0
SiePeasudMG_2_bin.87	KnobheadsudMG_2	0.232	4.891	0	0	0	4029	0	0.02	0.015	0.012	0.01	0.009	0.872554	571/10000	5	0
SiePeasudMG_2_bin.89	KnobheadsudMG_2	0.284	2.911	0	0	0	3288	91.1578	0.144	0.043	0.013	0.006	0.003	0.913067	1481/10000	1	0
SiePeasudMG_2_bin.92	KnobheadsudMG_2	0.016	1.285	0	0	0	571	0	0.002	0.001	0.001	0.001	0.001	0.862532	448/10000	3	0
SiePeasudMG_2_bin.93	KnobheadsudMG_2	0.047	2.05	0	0	0	1330	89.8108	0.005	0.003	0.002	0.001	0.001	0.842278	272/10000	3	0
SiePeasudMG_2_bin.95	KnobheadsudMG_2	0.216	2.795	0	0	0	2374	90.0431	0.036	0.018	0.012	0.009	0.008	0.874336	596/10000	2	0
TrioNunataknord_2_bin.100	KnobheadsudMG_2	0.127	5.984	0	0	0	783	0	0.002	0.002	0.001	0.001	0.001	0.827593	188/10000	4	1.06074e-218
TrioNunataknord_2_bin.101	KnobheadsudMG_2	0.313	7.006	0	0	0	7321	90.8962	0.029	0.021	0.018	0.015	0.013	0.870847	548/10000	4	0
TrioNunataknord_2_bin.117	KnobheadsudMG_2	0.853	3.361	0	0	0	23772	94.17	0.244	0.168	0.117	0.085	0.061	0.892182	911/10000	3	0
TrioNunataknord_2_bin.126	KnobheadsudMG_2	0.461	5.375	0	0	0	10920	91.2336	0.034	0.026	0.021	0.018	0.016	0.867872	510/10000	6	0
TrioNunataknord_2_bin.24	KnobheadsudMG_2	0.076	5.313	0	0	0	1925	0	0.002	0.002	0.002	0.002	0.001	0.824774	175/10000	3	2.25575e-198
TrioNunataknord_2_bin.27	KnobheadsudMG_2	0.18	1.931	0	0	0	2047	90.2889	0.03	0.02	0.015	0.012	0.01	0.881535	708/10000	5	0
TrioNunataknord_2_bin.28	KnobheadsudMG_2	0.128	2.685	0	0	0	4223	90.1637	0.044	0.017	0.009	0.005	0.003	0.849074	322/10000	2	0
TrioNunataknord_2_bin.29	KnobheadsudMG_2	4.489	16.714	0	1	3	119397	97.5832	0.683	0.46	0.296	0.197	0.139	0.972042	5513/10000	2	0
TrioNunataknord_2_bin.33	KnobheadsudMG_2	0.346	8.22	0	0	0	4772	90.4488	0.105	0.031	0.01	0.006	0.004	0.895635	988/10000	1	0
TrioNunataknord_2_bin.44	KnobheadsudMG_2	9.849	8.563	3	10	15	319317	95.825	0.81	0.78	0.752	0.727	0.7	0.948274	3278/10000	11	0
TrioNunataknord_2_bin.46	KnobheadsudMG_2	0.863	10.343	0	0	0	17205	91.9564	0.083	0.059	0.045	0.037	0.032	0.888387	833/10000	5	0
TrioNunataknord_2_bin.58	KnobheadsudMG_2	0.627	4.28	0	0	0	12241	91.6704	0.061	0.047	0.04	0.035	0.03	0.899599	1084/10000	5	0
TrioNunataknord_2_bin.6	KnobheadsudMG_2	0.683	5.715	0	0	0	19331	91.1579	0.051	0.04	0.033	0.029	0.026	0.896617	1011/10000	5	0
TrioNunataknord_2_bin.63	KnobheadsudMG_2	0.675	5.69	0	0	0	21738	91.7654	0.133	0.059	0.035	0.027	0.022	0.895027	974/10000	2	0
TrioNunataknord_2_bin.66	KnobheadsudMG_2	0.034	0.767	0	0	0	704	0	0.007	0.004	0.003	0.002	0.002	0.871968	563/10000	4	0
TrioNunataknord_2_bin.69	KnobheadsudMG_2	2.153	2.815	0	1	4	94574	96.2495	0.599	0.483	0.362	0.252	0.166	0.931786	2268/10000	3	0
TrioNunataknord_2_bin.79	KnobheadsudMG_2	1.036	12.021	0	0	0	13872	92.5103	0.05	0.038	0.032	0.028	0.026	0.890373	873/10000	5	0
TrioNunataknord_2_bin.83	KnobheadsudMG_2	0.228	7.943	0	0	0	5527	90.4392	0.01	0.008	0.006	0.006	0.005	0.863618	460/10000	4	0
TrioNunataknord_2_bin.9	KnobheadsudMG_2	1.235	6.203	0	0	0	17623	92.0417	0.079	0.067	0.06	0.055	0.051	0.890567	877/10000	12	0
TrioNunataknord_2_bin.90	KnobheadsudMG_2	6.544	4.422	3	6	9	219936	98.9645	0.933	0.886	0.821	0.736	0.641	0.990346	8157/10000	4	0
TrioNunataknord_2_bin.94	KnobheadsudMG_2	0.446	5.621	0	0	0	7711	91.2657	0.031	0.024	0.02	0.017	0.016	0.877176	638/10000	5	0
TrioNunataknord_2_bin.95	KnobheadsudMG_2	0.004	0.248	0	0	0	83	0	0.001	0.001	0	0	0	0.820522	157/10000	4	6.15533e-171
UniValnordMG_2_bin.12	KnobheadsudMG_2	54.319	53.452	10	56	82	1942167	97.0387	0.793	0.786	0.781	0.776	0.772	0.971374	5434/10000	51	0
UniValnordMG_2_bin.14	KnobheadsudMG_2	1.684	3.31	0	1	2	49018	96.4761	0.51	0.341	0.227	0.151	0.102	0.927806	2073/10000	2	0
UniValnordMG_2_bin.23	KnobheadsudMG_2	2.137	18.07	0	0	0	60693	91.7268	0.08	0.066	0.057	0.051	0.046	0.897908	1042/10000	8	0
UniValnordMG_2_bin.36	KnobheadsudMG_2	31.194	20.377	24	32	39	751343	99.0073	0.948	0.936	0.928	0.921	0.914	0.995016	9004/10000	25	0
UniValnordMG_2_bin.45	KnobheadsudMG_2	8.737	14.086	2	5	12	175510	98.6127	0.93	0.844	0.741	0.64	0.55	0.987917	7747/10000	3	0
UniValnordMG_2_bin.58	KnobheadsudMG_2	38.637	23.283	28	43	52	1444988	98.8655	0.906	0.896	0.887	0.88	0.874	0.990732	8224/10000	33	0
UniValnordMG_2_bin.66	KnobheadsudMG_2	0.984	7.731	0	0	0	24431	91.9049	0.082	0.064	0.053	0.046	0.04	0.894277	957/10000	8	0
UniValsudMG_2_bin.107	KnobheadsudMG_2	54.166	40.455	41	61	73	1152399	95.1316	0.854	0.85	0.847	0.845	0.843	0.95216	3572/10000	60	0
UniValsudMG_2_bin.109	KnobheadsudMG_2	0.031	2.302	0	0	0	212	0	0	0	0	0	0	0.811354	124/10000	5	4.40792e-123
UniValsudMG_2_bin.113	KnobheadsudMG_2	0.27	7.329	0	0	0	4992	90.3619	0.019	0.014	0.01	0.009	0.008	0.871224	553/10000	4	0
UniValsudMG_2_bin.125	KnobheadsudMG_2	0.921	4.069	0	0	1	30575	94.9044	0.428	0.203	0.088	0.04	0.019	0.936948	2547/10000	1	0
UniValsudMG_2_bin.127	KnobheadsudMG_2	0.341	1.613	0	0	0	11960	91.783	0.094	0.06	0.042	0.031	0.024	0.864503	470/10000	4	0
UniValsudMG_2_bin.16	KnobheadsudMG_2	0.121	5.026	0	0	0	3712	0	0.005	0.003	0.002	0.002	0.002	0.837604	242/10000	4	4.00645e-307
UniValsudMG_2_bin.19	KnobheadsudMG_2	0.12	1.611	0	0	0	2510	90.3589	0.013	0.01	0.009	0.008	0.007	0.830429	202/10000	3	4.90878e-241
UniValsudMG_2_bin.26	KnobheadsudMG_2	0.208	2.547	0	0	0	6262	91.8391	0.101	0.043	0.017	0.008	0.005	0.876383	626/10000	1	0
UniValsudMG_2_bin.27	KnobheadsudMG_2	2.77	13.055	0	0	0	101447	93.363	0.146	0.124	0.112	0.104	0.098	0.90457	1217/10000	11	0
UniValsudMG_2_bin.44	KnobheadsudMG_2	1.813	11.024	0	0	0	38943	93.9799	0.128	0.103	0.086	0.076	0.067	0.90562	1247/10000	5	0
UniValsudMG_2_bin.59	KnobheadsudMG_2	1.55	16.513	0	0	0	30775	92.958	0.164	0.098	0.063	0.046	0.036	0.903749	1194/10000	3	0
UniValsudMG_2_bin.68	KnobheadsudMG_2	0.266	8.956	0	0	0	6256	90.6099	0.013	0.008	0.006	0.005	0.004	0.87872	662/10000	3	0
UniValsudMG_2_bin.71	KnobheadsudMG_2	0.771	6.252	0	0	0	15765	91.7269	0.064	0.047	0.039	0.033	0.03	0.878593	660/10000	5	0
UniValsudMG_2_bin.79	KnobheadsudMG_2	0.167	5.671	0	0	0	3725	0	0.005	0.004	0.004	0.004	0.003	0.85633	385/10000	5	0
BatPronordMG_2_bin.40	LinTernordMG_2	1.039	10.678	0	0	0	36434	91.8628	0.087	0.069	0.061	0.055	0.051	0.85337	358/10000	39	0
BatPronordMG_2_bin.42	LinTernordMG_2	0.343	8.861	0	0	0	11725	0	0.005	0.004	0.004	0.003	0.003	0.806739	110/10000	7	3.30431e-111
ButProsudMG_2_bin.21	LinTernordMG_2	105.248	64.076	65	118	137	3645669	99.1289	0.979	0.972	0.966	0.96	0.954	0.997189	9426/10000	74	0
FingerMtnordMG_2_bin.101	LinTernordMG_2	26.599	25.268	0	26	48	806884	95.4602	0.669	0.659	0.651	0.643	0.636	0.934614	2417/10000	47	0
FingerMtnordMG_2_bin.102	LinTernordMG_2	0.092	2.895	0	0	0	2025	0	0.007	0.006	0.005	0.004	0.004	0.84754	310/10000	8	0
FingerMtnordMG_2_bin.103	LinTernordMG_2	2.393	16.863	0	0	0	22993	91.6286	0.073	0.064	0.058	0.054	0.051	0.891524	897/10000	22	0
FingerMtnordMG_2_bin.104	LinTernordMG_2	0.309	11.016	0	0	0	7373	91.0357	0.021	0.014	0.009	0.007	0.005	0.861511	437/10000	5	0
FingerMtnordMG_2_bin.109	LinTernordMG_2	0	0.021	0	0	0	12	0	0	0	0	0	0	0.743837	20/10000	1	3.37725e-08
FingerMtnordMG_2_bin.118	LinTernordMG_2	0.268	3.396	0	0	0	7072	89.8649	0.024	0.019	0.016	0.014	0.012	0.826316	182/10000	39	1.39909e-221
FingerMtnordMG_2_bin.120	LinTernordMG_2	0.003	0.211	0	0	0	47	0	0	0	0	0	0	0.815778	139/10000	5	9.72614e-154
FingerMtnordMG_2_bin.121	LinTernordMG_2	8.554	41.4	0	3	8	494598	95.9412	0.643	0.599	0.548	0.49	0.427	0.942337	2873/10000	7	0
FingerMtnordMG_2_bin.125	LinTernordMG_2	10.235	44.105	0	0	0	252716	93.4217	0.217	0.2	0.188	0.179	0.172	0.898276	1051/10000	55	0
FingerMtnordMG_2_bin.130	LinTernordMG_2	0.082	1.735	0	0	0	2247	89.7297	0.008	0.006	0.005	0.005	0.004	0.816333	141/10000	29	8.91188e-157
FingerMtnordMG_2_bin.137	LinTernordMG_2	10.591	27.145	0	1	11	303813	96.1912	0.528	0.484	0.448	0.418	0.392	0.924195	1910/10000	18	0
FingerMtnordMG_2_bin.15	LinTernordMG_2	3.048	22.708	0	0	0	86263	92.5149	0.133	0.118	0.107	0.101	0.094	0.891901	905/10000	17	0
FingerMtnordMG_2_bin.17	LinTernordMG_2	0.003	0.303	0	0	0	129	0	0	0	0	0	0	0.755851	28/10000	3	2.96739e-14
FingerMtnordMG_2_bin.18	LinTernordMG_2	0.022	1.317	0	0	0	1110	0	0.001	0.001	0.001	0	0	0.763925	35/10000	4	2.30545e-20
FingerMtnordMG_2_bin.19	LinTernordMG_2	0.02	1.566	0	0	0	491	0	0.005	0.002	0.001	0	0	0.813479	131/10000	2	1.02743e-141
FingerMtnordMG_2_bin.22	LinTernordMG_2	0.006	0.782	0	0	0	228	0	0	0	0	0	0	0.773122	45/10000	2	4.15242e-30
FingerMtnordMG_2_bin.24	LinTernordMG_2	0.012	0.869	0	0	0	466	0	0.001	0	0	0	0	0.769703	41/10000	5	4.40359e-26
FingerMtnordMG_2_bin.29	LinTernordMG_2	1.475	16.799	0	0	0	41958	92.0044	0.046	0.036	0.029	0.025	0.021	0.876979	635/10000	7	0
FingerMtnordMG_2_bin.3	LinTernordMG_2	0.001	0.095	0	0	0	26	0	0	0	0	0	0	0.782522	58/10000	4	3.46623e-44
FingerMtnordMG_2_bin.31	LinTernordMG_2	0.351	8.614	0	0	0	8064	0	0.009	0.007	0.007	0.006	0.005	0.845267	293/10000	7	0
FingerMtnordMG_2_bin.33	LinTernordMG_2	0.18	2.915	0	0	0	5296	90.185	0.02	0.016	0.014	0.012	0.01	0.820522	157/10000	21	1.62875e-181
FingerMtnordMG_2_bin.35	LinTernordMG_2	0.001	0.136	0	0	0	63	0	0	0	0	0	0	0.755851	28/10000	2	2.96739e-14
FingerMtnordMG_2_bin.38	LinTernordMG_2	0.092	7.318	0	0	0	2302	0	0.001	0.001	0.001	0.001	0.001	0.813182	130/10000	4	3.1618e-140
FingerMtnordMG_2_bin.41	LinTernordMG_2	0.006	0.442	0	0	0	116	0	0.001	0	0	0	0	0.830035	200/10000	7	2.2199e-251
FingerMtnordMG_2_bin.53	LinTernordMG_2	3.571	12.199	0	0	3	111265	95.1438	0.33	0.284	0.251	0.226	0.206	0.911696	1435/10000	15	0
FingerMtnordMG_2_bin.57	LinTernordMG_2	2.315	28.856	0	0	0	69754	91.9409	0.097	0.074	0.063	0.056	0.052	0.880211	686/10000	14	0
FingerMtnordMG_2_bin.58	LinTernordMG_2	0.657	1.96	0	0	1	11020	94.1055	0.253	0.154	0.093	0.056	0.032	0.903278	1181/10000	3	0
FingerMtnordMG_2_bin.61	LinTernordMG_2	0.867	20.57	0	0	0	22341	0	0.009	0.008	0.007	0.007	0.007	0.848057	314/10000	14	0
FingerMtnordMG_2_bin.63	LinTernordMG_2	0.187	10.637	0	0	0	8454	0	0.003	0.003	0.003	0.002	0.002	0.842131	271/10000	4	0
FingerMtnordMG_2_bin.65	LinTernordMG_2	0.128	1.39	0	0	0	5058	90.7162	0.03	0.021	0.015	0.011	0.008	0.855039	373/10000	7	0
FingerMtnordMG_2_bin.66	LinTernordMG_2	0.913	4.388	0	0	0	40521	93.3716	0.165	0.128	0.103	0.084	0.07	0.884957	768/10000	9	0
FingerMtnordMG_2_bin.70	LinTernordMG_2	0.436	5.405	0	0	0	14041	91.3174	0.04	0.033	0.028	0.024	0.022	0.865712	484/10000	18	0
FingerMtnordMG_2_bin.85	LinTernordMG_2	0.338	5.59	0	0	0	16670	91.6426	0.057	0.041	0.031	0.024	0.019	0.867054	500/10000	6	0
FingerMtnordMG_2_bin.86	LinTernordMG_2	0.202	6.125	0	0	0	8955	0	0.006	0.005	0.004	0.004	0.004	0.818219	148/10000	3	1.66017e-167
FingerMtnordMG_2_bin.89	LinTernordMG_2	0.157	5.55	0	0	0	3287	0	0.003	0.003	0.003	0.002	0.002	0.832342	212/10000	16	1.19648e-271
FingerMtnordMG_2_bin.9	LinTernordMG_2	0.659	2.314	0	0	0	29232	92.8526	0.134	0.103	0.081	0.066	0.054	0.880938	698/10000	6	0
FingerMtnordMG_2_bin.94	LinTernordMG_2	0.336	5.726	0	0	0	7756	91.8017	0.06	0.039	0.026	0.018	0.013	0.87789	649/10000	4	0
FingerMtnordMG_2_bin.96	LinTernordMG_2	0.515	8.791	0	0	0	10071	91.1099	0.026	0.017	0.014	0.011	0.009	0.868436	517/10000	4	0
FingerMtnordMG_2_bin.98	LinTernordMG_2	0.401	6.897	0	0	0	7244	0	0.013	0.012	0.01	0.01	0.009	0.862164	444/10000	7	0
FingerMtnordMG_2_bin.99	LinTernordMG_2	0.138	10.405	0	0	0	4698	89.9066	0.009	0.005	0.004	0.003	0.002	0.831396	207/10000	4	3.63581e-263
FingerMtsudMG_2_bin.2	LinTernordMG_2	33.372	56.01	0	8	63	1716011	95.7455	0.588	0.568	0.555	0.543	0.532	0.934485	2410/10000	69	0
FingerMtsudMG_2_bin.24	LinTernordMG_2	3.406	25.917	0	0	0	75997	92.0959	0.083	0.074	0.068	0.064	0.061	0.895289	980/10000	18	0
FingerMtsudMG_2_bin.25	LinTernordMG_2	0.005	0.092	0	0	0	95	0	0.003	0.001	0	0	0	0.802313	98/10000	3	1.52528e-94
FingerMtsudMG_2_bin.3	LinTernordMG_2	0.029	1.656	0	0	0	987	0	0.006	0.002	0.001	0.001	0.001	0.798212	88/10000	1	3.82946e-81
FingerMtsudMG_2_bin.49	LinTernordMG_2	43.498	31.879	35	42	49	1262589	99.8613	0.985	0.983	0.982	0.982	0.981	0.998776	9746/10000	36	0
FingerMtsudMG_2_bin.5	LinTernordMG_2	0.176	11.708	0	0	0	3697	0	0.006	0.005	0.004	0.003	0.003	0.808112	114/10000	33	6.82359e-117
FingerMtsudMG_2_bin.50	LinTernordMG_2	0.001	0.087	0	0	0	24	0	0	0	0	0	0	0.817152	144/10000	10	2.34275e-161
FingerMtsudMG_2_bin.66	LinTernordMG_2	0.151	1.706	0	0	0	2794	90.1061	0.021	0.017	0.014	0.012	0.01	0.825882	180/10000	37	2.56898e-218
FingerMtsudMG_2_bin.74	LinTernordMG_2	5.413	25.194	0	1	3	127480	98.0762	0.661	0.419	0.254	0.159	0.108	0.975868	5987/10000	2	0
FingerMtsudMG_2_bin.9	LinTernordMG_2	24.599	137.377	0	0	2	1419380	95.1224	0.369	0.286	0.241	0.218	0.206	0.913563	1498/10000	3	0
KnobheadnordMG_2_bin.23	LinTernordMG_2	25.65	37.522	14	20	26	761932	98.9677	0.949	0.933	0.918	0.907	0.896	0.993645	8747/10000	16	0
KnobheadnordMG_2_bin.34	LinTernordMG_2	39.507	23.949	21	46	57	1080782	96.2098	0.831	0.826	0.822	0.819	0.815	0.959695	4215/10000	48	0
KnobheadnordMG_2_bin.72	LinTernordMG_2	1.749	14.696	0	0	0	40707	92.7163	0.124	0.104	0.091	0.081	0.074	0.885987	787/10000	17	0
KnobheadsudMG_2_bin.2	LinTernordMG_2	13.965	27.909	0	1	19	349966	96.5076	0.536	0.497	0.468	0.444	0.425	0.927614	2064/10000	22	0
KnobheadsudMG_2_bin.4	LinTernordMG_2	0.172	14.273	0	0	0	3562	0	0.001	0.001	0.001	0.001	0.001	0.845129	292/10000	4	0
KnobheadsudMG_2_bin.48	LinTernordMG_2	0.218	2.204	0	0	0	6156	90.3641	0.026	0.021	0.017	0.015	0.013	0.823637	170/10000	31	3.80333e-202
KnobheadsudMG_2_bin.80	LinTernordMG_2	17.033	92.601	0	0	2	744498	95.4501	0.426	0.304	0.231	0.193	0.173	0.929212	2140/10000	2	0
LinTernordMG_2_bin.2	LinTernordMG_2	88.682	34.981	76	86	96	2738385	99.9983	1	1	1	1	1	1	10000/10000	74	0
LinTernordMG_2_bin.21	LinTernordMG_2	25.709	41.816	16	21	26	1488061	99.9885	1	0.999	0.998	0.997	0.994	1	10000/10000	17	0
LinTernordMG_2_bin.22	LinTernordMG_2	148.161	41.821	132	145	159	4449068	99.9901	1	1	1	1	1	1	10000/10000	124	0
LinTernordMG_2_bin.4	LinTernordMG_2	18.427	15.139	13	17	21	525946	99.9846	1	0.999	0.998	0.996	0.993	0.99999	9998/10000	14	0
LinTernordMG_2_bin.44	LinTernordMG_2	38.315	16.19	31	37	43	1034520	99.999	1	1	1	1	1	1	10000/10000	32	0
LinTernordMG_2_bin.8	LinTernordMG_2	56.367	25.367	45	54	64	1783220	99.9938	1	1	1	1	0.999	1	10000/10000	44	0
MtNewZealnordMG_2_bin.1	LinTernordMG_2	1.115	11.229	0	0	0	24211	94.066	0.23	0.146	0.091	0.056	0.036	0.900227	1100/10000	3	0
MtNewZealnordMG_2_bin.10	LinTernordMG_2	0.595	7.832	0	0	0	22147	91.8383	0.07	0.048	0.035	0.026	0.02	0.876116	622/10000	4	0
MtNewZealnordMG_2_bin.105	LinTernordMG_2	0.05	6.5	0	0	0	1175	0	0.001	0	0	0	0	0.810726	122/10000	2	1.91355e-128
MtNewZealnordMG_2_bin.16	LinTernordMG_2	50.24	23.143	45	53	61	1431781	99.2022	0.924	0.923	0.922	0.921	0.92	0.991585	8374/10000	47	0
MtNewZealnordMG_2_bin.19	LinTernordMG_2	0.043	5.308	0	0	0	1022	0	0.001	0	0	0	0	0.822703	166/10000	3	9.47532e-196
MtNewZealnordMG_2_bin.25	LinTernordMG_2	5.333	56.822	0	0	0	178544	93.0493	0.142	0.12	0.106	0.095	0.088	0.888234	830/10000	18	0
MtNewZealnordMG_2_bin.27	LinTernordMG_2	3.723	22.181	0	0	0	141266	94.0575	0.123	0.106	0.096	0.088	0.083	0.903713	1193/10000	7	0
MtNewZealnordMG_2_bin.7	LinTernordMG_2	0.225	7.619	0	0	0	6629	0	0.004	0.003	0.002	0.002	0.002	0.808782	116/10000	4	9.29689e-120
MtNewZealnordMG_2_bin.74	LinTernordMG_2	12.127	6.086	9	12	15	509625	99.1917	0.945	0.942	0.938	0.931	0.919	0.992485	8535/10000	11	0
MtNewZealnordMG_2_bin.9	LinTernordMG_2	0.7	24.503	0	0	0	11028	0	0.007	0.006	0.005	0.005	0.004	0.840777	262/10000	14	0
PudButnordMG_2_bin.11	LinTernordMG_2	0.075	2.531	0	0	0	2586	0	0.003	0.002	0.002	0.001	0.001	0.778463	52/10000	2	1.63373e-37
PudButnordMG_2_bin.13	LinTernordMG_2	0.046	5.578	0	0	0	1447	89.0172	0.007	0.001	0	0	0	0.795532	82/10000	1	2.44799e-73
PudButnordMG_2_bin.2	LinTernordMG_2	0.558	9.776	0	0	0	11208	91.2868	0.026	0.02	0.016	0.013	0.012	0.867628	507/10000	5	0
PudButnordMG_2_bin.22	LinTernordMG_2	9.641	18.016	0	0	16	516525	95.1901	0.457	0.421	0.397	0.38	0.365	0.915829	1578/10000	28	0
PudButnordMG_2_bin.3	LinTernordMG_2	5.028	37.949	0	0	0	287570	93.4234	0.171	0.149	0.134	0.123	0.113	0.901115	1123/10000	16	0
PudButnordMG_2_bin.36	LinTernordMG_2	0.009	0.139	0	0	0	322	88.8725	0.007	0.001	0	0	0	0.826746	184/10000	2	7.4514e-225
PudButnordMG_2_bin.42	LinTernordMG_2	0.087	1.918	0	0	0	3195	0	0.004	0.003	0.003	0.003	0.003	0.772295	44/10000	1	4.3605e-29
PudButnordMG_2_bin.5	LinTernordMG_2	7.892	37.742	0	0	0	110009	92.9763	0.205	0.185	0.174	0.165	0.157	0.902949	1172/10000	31	0
PudButnordMG_2_bin.53	LinTernordMG_2	0.129	1.138	0	0	0	4037	90.2671	0.032	0.021	0.015	0.011	0.009	0.861039	432/10000	6	0
PudButnordMG_2_bin.56	LinTernordMG_2	0.676	2.595	0	0	0	29138	92.8246	0.136	0.104	0.082	0.067	0.054	0.879097	668/10000	8	0
PudButnordMG_2_bin.59	LinTernordMG_2	0.014	0.146	0	0	0	363	88.4938	0.012	0.002	0	0	0	0.804217	103/10000	1	2.05879e-101
PudButnordMG_2_bin.60	LinTernordMG_2	0.056	2.043	0	0	0	2280	0	0.002	0.001	0.001	0.001	0.001	0.754543	27/10000	3	1.94306e-13
PudButnordMG_2_bin.67	LinTernordMG_2	0.073	6.116	0	0	0	1972	0	0.002	0.001	0.001	0.001	0.001	0.838258	246/10000	7	0
PudButnordMG_2_bin.81	LinTernordMG_2	1.847	17.11	0	0	0	47947	92.4842	0.157	0.089	0.058	0.045	0.039	0.891948	906/10000	3	0
PudButnordMG_2_bin.85	LinTernordMG_2	0.103	0.55	0	0	0	3154	90.75	0.072	0.021	0.005	0.002	0	0.848696	319/10000	1	0
PudButnordMG_2_bin.88	LinTernordMG_2	0.029	0.36	0	0	0	704	89.8572	0.018	0.005	0.002	0.001	0	0.833811	220/10000	1	2.49752e-285
PudButnordMG_2_bin.90	LinTernordMG_2	6.719	40.272	0	0	3	348739	95.3675	0.342	0.3	0.271	0.247	0.227	0.910964	1411/10000	11	0
PudButnordMG_2_bin.95	LinTernordMG_2	1.176	4.833	0	0	0	57112	93.7927	0.196	0.157	0.13	0.109	0.092	0.88588	785/10000	9	0
PudButsudMG_2_bin.15	LinTernordMG_2	0.054	1.87	0	0	0	1466	90.3491	0.024	0.006	0.002	0.001	0	0.83488	226/10000	1	1.12817e-295
PudButsudMG_2_bin.38	LinTernordMG_2	0.733	15.561	0	0	0	24391	0	0.011	0.01	0.01	0.01	0.01	0.822467	165/10000	21	3.70775e-194
PudButsudMG_2_bin.44	LinTernordMG_2	1.153	6.977	0	0	0	40609	92.1667	0.137	0.087	0.069	0.061	0.055	0.887722	820/10000	1	0
PudButsudMG_2_bin.46	LinTernordMG_2	0.076	1.644	0	0	0	2054	89.6417	0.006	0.005	0.004	0.004	0.003	0.814645	135/10000	14	1.06128e-147
PudButsudMG_2_bin.57	LinTernordMG_2	2.976	40.375	0	0	0	71520	91.5709	0.08	0.065	0.056	0.049	0.044	0.883563	743/10000	18	0
PudButsudMG_2_bin.59	LinTernordMG_2	22.163	92.772	0	1	4	1332023	97.8948	0.677	0.47	0.335	0.259	0.218	0.973661	5709/10000	2	0
PudButsudMG_2_bin.62	LinTernordMG_2	95.746	56.64	81	103	117	3401365	99.0921	0.924	0.918	0.912	0.907	0.904	0.990732	8224/10000	88	0
PudButsudMG_2_bin.78	LinTernordMG_2	6.795	45.201	0	0	0	168879	92.6272	0.136	0.122	0.113	0.107	0.101	0.888741	840/10000	36	0
RickerHillsnord_2_bin.11	LinTernordMG_2	5.504	15.991	0	0	0	152223	93.3764	0.21	0.19	0.176	0.166	0.157	0.880697	694/10000	56	0
RickerHillsnord_2_bin.17	LinTernordMG_2	0.51	16.086	0	0	0	10910	90.7931	0.033	0.02	0.014	0.01	0.007	0.878147	653/10000	4	0
RickerHillsnord_2_bin.19	LinTernordMG_2	3.419	20.035	1	2	4	67440	97.061	0.783	0.647	0.493	0.347	0.228	0.967688	5017/10000	3	0
RickerHillsnord_2_bin.23	LinTernordMG_2	2.269	26.21	0	0	0	72362	93.1022	0.167	0.088	0.053	0.04	0.033	0.889934	864/10000	3	0
RickerHillsnord_2_bin.25	LinTernordMG_2	0.513	11.507	0	0	0	17816	91.6109	0.086	0.059	0.044	0.034	0.026	0.86771	508/10000	5	0
RickerHillsnord_2_bin.26	LinTernordMG_2	2.552	17.552	0	0	0	59134	92.5327	0.125	0.104	0.091	0.081	0.073	0.897371	1029/10000	17	0
RickerHillsnord_2_bin.29	LinTernordMG_2	2.263	18.635	0	0	0	36201	91.4245	0.067	0.057	0.052	0.048	0.045	0.882183	719/10000	19	0
RickerHillsnord_2_bin.30	LinTernordMG_2	21.475	26.841	12	18	26	479869	98.6887	0.95	0.936	0.925	0.914	0.904	0.991263	8317/10000	12	0
RickerHillsnord_2_bin.32	LinTernordMG_2	0.837	12.495	0	0	0	23234	91.6013	0.061	0.049	0.041	0.035	0.031	0.877632	645/10000	13	0
RickerHillsnord_2_bin.34	LinTernordMG_2	10.721	40.485	0	0	3	643824	94.5154	0.324	0.287	0.264	0.247	0.233	0.932907	2326/10000	14	0
RickerHillsnord_2_bin.36	LinTernordMG_2	4.655	27.756	0	0	0	184246	91.9139	0.13	0.099	0.087	0.081	0.076	0.899242	1075/10000	11	0
RickerHillsnord_2_bin.37	LinTernordMG_2	3.734	23.128	0	0	0	92467	92.2357	0.103	0.093	0.085	0.08	0.074	0.891334	893/10000	19	0
RickerHillsnord_2_bin.48	LinTernordMG_2	17.767	21.805	0	12	32	450908	95.8727	0.675	0.65	0.632	0.616	0.601	0.932195	2289/10000	34	0
RickerHillsnord_2_bin.50	LinTernordMG_2	11.257	20.598	0	0	15	232607	96.2928	0.49	0.453	0.426	0.404	0.386	0.921612	1801/10000	21	0
RickerHillsnord_2_bin.54	LinTernordMG_2	9.107	34.203	4	7	9	318197	99.7494	0.967	0.944	0.896	0.824	0.728	0.99734	9456/10000	6	0
RickerHillsnord_2_bin.55	LinTernordMG_2	3.221	19.967	0	0	0	96587	92.7337	0.099	0.087	0.079	0.073	0.068	0.891524	897/10000	16	0
RickerHillsnord_2_bin.63	LinTernordMG_2	0.166	3.147	0	0	0	6558	0	0.005	0.004	0.004	0.004	0.004	0.769703	41/10000	2	4.40359e-26
RickerHillsnord_2_bin.8	LinTernordMG_2	6.047	16.135	0	0	0	148204	93.4088	0.244	0.218	0.201	0.19	0.18	0.88015	685/10000	55	0
RicNunsandstonMG_3_bin.1	LinTernordMG_2	1.815	14.386	0	0	0	28151	0	0.038	0.034	0.032	0.03	0.029	0.874266	595/10000	15	0
RicNunsandstonMG_3_bin.11	LinTernordMG_2	0.169	1.614	0	0	0	6849	91.0053	0.045	0.031	0.022	0.016	0.012	0.844713	289/10000	8	0
RicNunsandstonMG_3_bin.12	LinTernordMG_2	15.431	62.84	0	0	2	378664	95.3899	0.389	0.279	0.222	0.196	0.181	0.916922	1618/10000	3	0
RicNunsandstonMG_3_bin.13	LinTernordMG_2	0.005	0.296	0	0	0	49	0	0.001	0	0	0	0	0.816608	142/10000	4	2.66873e-158
RicNunsandstonMG_3_bin.19	LinTernordMG_2	0.062	3.866	0	0	0	1633	0	0.002	0.001	0.001	0.001	0.001	0.824323	173/10000	5	5.6962e-207
RicNunsandstonMG_3_bin.21	LinTernordMG_2	0.053	3.355	0	0	0	1286	0	0.002	0.001	0.001	0.001	0.001	0.846083	299/10000	3	0
RicNunsandstonMG_3_bin.25	LinTernordMG_2	1.27	12.46	0	0	0	36991	92.2634	0.107	0.089	0.077	0.068	0.06	0.883336	739/10000	14	0
RicNunsandstonMG_3_bin.26	LinTernordMG_2	0.345	9.242	0	0	0	4729	0	0.014	0.011	0.008	0.006	0.005	0.846884	305/10000	3	0
RicNunsandstonMG_3_bin.35	LinTernordMG_2	0.001	0.044	0	0	0	19	0	0	0	0	0	0	0.74722	22/10000	1	1.32614e-09
RicNunsandstonMG_3_bin.43	LinTernordMG_2	0.783	6.981	0	0	0	16588	91.8162	0.061	0.049	0.041	0.035	0.031	0.871894	562/10000	16	0
RicNunsandstonMG_3_bin.47	LinTernordMG_2	0.033	0.749	0	0	0	548	0	0.004	0.003	0.003	0.002	0.002	0.844991	291/10000	7	0
RicNunsandstonMG_3_bin.48	LinTernordMG_2	3.375	30.411	0	0	0	137787	93.8824	0.215	0.176	0.15	0.131	0.115	0.895027	974/10000	11	0
RicNunsandstonMG_3_bin.58	LinTernordMG_2	0.128	1.413	0	0	0	2597	90.3018	0.018	0.015	0.012	0.01	0.009	0.817422	145/10000	37	6.86837e-163
RicNunsandstonMG_3_bin.62	LinTernordMG_2	0.009	0.937	0	0	0	211	0	0.001	0	0	0	0	0.803086	100/10000	2	2.80864e-97
RicNunsandstonMG_3_bin.63	LinTernordMG_2	0.002	0.16	0	0	0	39	0	0	0	0	0	0	0.823867	171/10000	2	9.43065e-204
RicNunsandstonMG_3_bin.67	LinTernordMG_2	0.002	0.056	0	0	0	69	0	0.001	0	0	0	0	0.762871	34/10000	1	1.88404e-19
RicNunsandstonMG_3_bin.7	LinTernordMG_2	0.095	11.337	0	0	0	2742	0	0	0	0	0	0	0.738102	17/10000	8	3.01696e-06
RicNunsandstonMG_3_bin.70	LinTernordMG_2	0.026	2.264	0	0	0	1263	88.7869	0.01	0.003	0.001	0	0	0.827803	189/10000	2	4.43077e-233
RicNunsandstonMG_3_bin.74	LinTernordMG_2	2.353	53.58	0	0	0	62166	91.6724	0.084	0.061	0.049	0.044	0.039	0.878275	655/10000	11	0
RicNunsandstonMG_3_bin.78	LinTernordMG_2	3.484	26.451	0	0	0	153109	93.8575	0.213	0.176	0.151	0.132	0.117	0.899042	1070/10000	10	0
RicNunsandstonMG_3_bin.85	LinTernordMG_2	0.004	0.376	0	0	0	137	0	0.001	0	0	0	0	0.750323	24/10000	1	4.37263e-11
RicNunsandstonMG_3_bin.86	LinTernordMG_2	0.062	2.126	0	0	0	1465	0	0.002	0.002	0.002	0.002	0.001	0.80944	118/10000	5	1.22344e-122
RicNunsandstonMG_3_bin.88	LinTernordMG_2	1.119	5.662	0	0	0	42400	91.9931	0.09	0.076	0.068	0.062	0.057	0.854711	370/10000	36	0
RicNunsandstonMG_3_bin.89	LinTernordMG_2	1.094	21.72	0	0	0	36635	91.0692	0.022	0.019	0.017	0.015	0.014	0.864765	473/10000	9	0
RicNunsandstonMG_3_bin.90	LinTernordMG_2	0.067	2.503	0	0	0	1444	0	0.002	0.002	0.001	0.001	0.001	0.760672	32/10000	10	1.15293e-17
RicNunsandstonMG_3_bin.91	LinTernordMG_2	1.264	5.011	0	0	0	55015	93.9553	0.224	0.173	0.14	0.116	0.097	0.895158	977/10000	7	0
RicNunsandstonMG_3_bin.93	LinTernordMG_2	0.41	3.695	0	0	0	14905	92.2769	0.082	0.059	0.042	0.031	0.022	0.886626	799/10000	3	0
RicNunsandstonMG_3_bin.94	LinTernordMG_2	0.563	5.47	0	0	0	14314	91.1381	0.051	0.041	0.036	0.031	0.027	0.874753	602/10000	14	0
RicNunsandstonMG_3_bin.95	LinTernordMG_2	0	0.022	0	0	0	3	0	0	0	0	0	0	0.728733	13/10000	2	0.000546202
RicNunsandstonMG_4_bin.33	LinTernordMG_2	2.473	5.084	0	1	4	85676	96.6966	0.55	0.445	0.353	0.27	0.2	0.921637	1802/10000	4	0
RicNunsandstonMG_4_bin.58	LinTernordMG_2	2.217	6.553	0	1	3	65866	98.5905	0.667	0.498	0.336	0.212	0.126	0.977673	6224/10000	2	0
RicNunsandstonMG_4_bin.63	LinTernordMG_2	0.164	12.075	0	0	0	3333	0	0.005	0.004	0.003	0.003	0.002	0.814931	136/10000	21	3.32026e-149
RicNunsandstonMG_4_bin.75	LinTernordMG_2	0.08	2.301	0	0	0	1376	89.8803	0.016	0.009	0.005	0.004	0.002	0.860754	429/10000	4	0
RicNunsandstonMG_4_bin.86	LinTernordMG_2	0.494	21.523	0	0	0	9111	91.3427	0.034	0.023	0.016	0.012	0.009	0.87711	637/10000	4	0
RicNunsandstonMG_4_bin.87	LinTernordMG_2	1.757	16.668	0	0	0	46885	92.0132	0.083	0.07	0.062	0.056	0.051	0.882532	725/10000	17	0
RicNunsandstonMG_4_bin.94	LinTernordMG_2	30.268	34.315	5	33	42	1587407	98.2983	0.87	0.818	0.786	0.768	0.756	0.987214	7632/10000	30	0
SiePeanordMG_2_bin.15	LinTernordMG_2	6.611	29.492	0	0	7	277358	95.9494	0.476	0.398	0.355	0.324	0.299	0.923592	1884/10000	4	0
SiePeanordMG_2_bin.16	LinTernordMG_2	0.059	5.779	0	0	0	1722	89.1709	0.016	0.003	0.001	0	0	0.831396	207/10000	1	3.63581e-263
SiePeanordMG_2_bin.21	LinTernordMG_2	0.911	23.026	0	0	0	22235	90.2199	0.044	0.022	0.016	0.014	0.014	0.869697	533/10000	3	0
SiePeanordMG_2_bin.24	LinTernordMG_2	0.016	0.854	0	0	0	509	89.1493	0.006	0.002	0	0	0	0.817955	147/10000	2	5.78157e-166
SiePeanordMG_2_bin.38	LinTernordMG_2	0.008	0.385	0	0	0	231	89.1447	0.004	0.001	0	0	0	0.802313	98/10000	1	1.52528e-94
SiePeanordMG_2_bin.41	LinTernordMG_2	4.999	26.557	0	0	0	153243	93.2633	0.171	0.148	0.133	0.122	0.114	0.909305	1358/10000	10	0
SiePeanordMG_2_bin.44	LinTernordMG_2	7.784	28.566	0	0	3	198271	94.8194	0.362	0.293	0.26	0.24	0.224	0.93359	2362/10000	15	0
SiePeanordMG_2_bin.53	LinTernordMG_2	16.148	16.456	9	16	21	436134	96.4594	0.862	0.832	0.816	0.807	0.799	0.973196	5652/10000	15	0
SiePeanordMG_2_bin.56	LinTernordMG_2	2.959	13.876	0	0	0	78023	93.0322	0.16	0.129	0.113	0.103	0.095	0.896278	1003/10000	20	0
SiePeanordMG_2_bin.60	LinTernordMG_2	21.427	35.726	13	18	25	615621	98.3041	0.898	0.887	0.88	0.874	0.868	0.983929	7116/10000	16	0
SiePeanordMG_2_bin.70	LinTernordMG_2	2.72	16.891	0	0	0	75247	93.955	0.117	0.1	0.09	0.082	0.075	0.89856	1058/10000	8	0
SiePeanordMG_2_bin.71	LinTernordMG_2	0.004	0.072	0	0	0	68	0	0.004	0	0	0	0	0.808112	114/10000	2	6.82359e-117
SiePeanordMG_2_bin.9	LinTernordMG_2	2.235	12.719	0	0	1	75460	95.1674	0.301	0.237	0.191	0.156	0.127	0.9045	1215/10000	7	0
SiePeasudMG_2_bin.1	LinTernordMG_2	1.152	10.959	0	0	0	27788	91.358	0.037	0.032	0.029	0.027	0.025	0.872916	576/10000	24	0
SiePeasudMG_2_bin.102	LinTernordMG_2	0.62	22.141	0	0	0	14764	90.9534	0.009	0.008	0.007	0.006	0.006	0.850433	333/10000	10	0
SiePeasudMG_2_bin.103	LinTernordMG_2	0.088	2.085	0	0	0	1726	89.6619	0.012	0.007	0.005	0.004	0.003	0.856117	383/10000	5	0
SiePeasudMG_2_bin.105	LinTernordMG_2	0.235	7.413	0	0	0	8604	0	0.003	0.003	0.003	0.002	0.002	0.826746	184/10000	4	7.4514e-225
SiePeasudMG_2_bin.106	LinTernordMG_2	1.147	12.823	0	0	0	29530	91.5694	0.041	0.036	0.033	0.031	0.029	0.863886	463/10000	17	0
SiePeasudMG_2_bin.11	LinTernordMG_2	0.49	6.615	0	0	0	6124	91.0319	0.028	0.022	0.018	0.016	0.015	0.874266	595/10000	17	0
SiePeasudMG_2_bin.112	LinTernordMG_2	0.011	1.479	0	0	0	344	0	0	0	0	0	0	0.78902	69/10000	16	4.22616e-57
SiePeasudMG_2_bin.114	LinTernordMG_2	0.003	0.427	0	0	0	95	0	0	0	0	0	0	0.772295	44/10000	3	4.3605e-29
SiePeasudMG_2_bin.118	LinTernordMG_2	1.845	14.08	0	0	0	48709	92.3724	0.057	0.052	0.05	0.047	0.045	0.884847	766/10000	16	0
SiePeasudMG_2_bin.12	LinTernordMG_2	0.006	0.718	0	0	0	173	0	0	0	0	0	0	0.786779	65/10000	3	2.61033e-52
SiePeasudMG_2_bin.121	LinTernordMG_2	0.002	0.145	0	0	0	61	0	0	0	0	0	0	0.762871	34/10000	2	1.88404e-19
SiePeasudMG_2_bin.16	LinTernordMG_2	0.235	5.961	0	0	0	4932	90.9587	0.009	0.007	0.006	0.005	0.005	0.840316	259/10000	17	0
SiePeasudMG_2_bin.2	LinTernordMG_2	2.588	33.675	0	0	0	52760	91.6416	0.056	0.046	0.041	0.037	0.035	0.882993	733/10000	17	0
SiePeasudMG_2_bin.22	LinTernordMG_2	0.034	1.187	0	0	0	1460	0	0.002	0.001	0.001	0.001	0.001	0.763925	35/10000	8	2.30545e-20
SiePeasudMG_2_bin.25	LinTernordMG_2	0.093	4.122	0	0	0	1782	0	0.002	0.002	0.001	0.001	0.001	0.792159	75/10000	8	1.79069e-64
SiePeasudMG_2_bin.29	LinTernordMG_2	0	0	0	0	0	0	0	0	0	0	0	0	0.760672	32/10000	3	1.15293e-17
SiePeasudMG_2_bin.3	LinTernordMG_2	0.876	10.609	0	0	0	18986	90.8881	0.029	0.025	0.021	0.019	0.018	0.869852	535/10000	15	0
SiePeasudMG_2_bin.31	LinTernordMG_2	0.869	7.491	0	0	0	17533	91.4991	0.065	0.052	0.043	0.038	0.033	0.883165	736/10000	15	0
SiePeasudMG_2_bin.35	LinTernordMG_2	0.171	2.806	0	0	0	4726	90.2286	0.02	0.016	0.013	0.01	0.009	0.873418	583/10000	9	0
SiePeasudMG_2_bin.36	LinTernordMG_2	0.006	0.384	0	0	0	234	0	0.001	0	0	0	0	0.754543	27/10000	1	1.94306e-13
SiePeasudMG_2_bin.38	LinTernordMG_2	0.907	8.48	0	0	0	18851	91.4754	0.041	0.037	0.033	0.03	0.028	0.865882	486/10000	23	0
SiePeasudMG_2_bin.40	LinTernordMG_2	2.378	26.233	0	0	0	131451	92.4875	0.129	0.108	0.095	0.086	0.079	0.882474	724/10000	6	0
SiePeasudMG_2_bin.41	LinTernordMG_2	0	0.006	0	0	0	1	0	0	0	0	0	0	0.803466	101/10000	14	1.18715e-98
SiePeasudMG_2_bin.44	LinTernordMG_2	0.277	7.043	0	0	0	6765	90.2365	0.007	0.005	0.005	0.004	0.004	0.85175	344/10000	7	0
SiePeasudMG_2_bin.47	LinTernordMG_2	0.038	1.856	0	0	0	1146	0	0.002	0.002	0.001	0.001	0.001	0.816057	140/10000	3	2.95476e-155
SiePeasudMG_2_bin.50	LinTernordMG_2	0.403	11.484	0	0	0	14032	89.844	0.014	0.011	0.01	0.009	0.008	0.843728	282/10000	18	0
SiePeasudMG_2_bin.51	LinTernordMG_2	0.854	9.596	0	0	0	24623	91.1122	0.033	0.027	0.024	0.022	0.02	0.873703	587/10000	16	0
SiePeasudMG_2_bin.52	LinTernordMG_2	0.088	2.808	0	0	0	2385	0	0.005	0.004	0.003	0.003	0.003	0.838258	246/10000	7	0
SiePeasudMG_2_bin.55	LinTernordMG_2	0.061	8.14	0	0	0	1422	0	0	0	0	0	0	0.748804	23/10000	3	2.45898e-10
SiePeasudMG_2_bin.56	LinTernordMG_2	0.11	4.595	0	0	0	3510	0	0.002	0.002	0.002	0.002	0.002	0.821989	163/10000	4	5.57348e-191
SiePeasudMG_2_bin.58	LinTernordMG_2	0.045	1.087	0	0	0	772	0	0.009	0.005	0.003	0.002	0.002	0.863797	462/10000	5	0
SiePeasudMG_2_bin.59	LinTernordMG_2	0.485	18.439	0	0	0	9753	90.4497	0.019	0.013	0.009	0.007	0.006	0.867547	506/10000	4	0
SiePeasudMG_2_bin.62	LinTernordMG_2	0.964	5.158	0	0	0	40977	91.9412	0.085	0.071	0.061	0.054	0.049	0.858296	404/10000	25	0
SiePeasudMG_2_bin.63	LinTernordMG_2	4.846	12.769	0	0	7	86688	96.149	0.49	0.437	0.394	0.356	0.322	0.910841	1407/10000	14	0
SiePeasudMG_2_bin.64	LinTernordMG_2	2.232	29.66	0	0	0	50484	91.8043	0.056	0.048	0.042	0.038	0.035	0.88015	685/10000	19	0
SiePeasudMG_2_bin.65	LinTernordMG_2	0.485	13.299	0	0	0	10326	91.0247	0.017	0.013	0.01	0.009	0.008	0.857376	395/10000	6	0
SiePeasudMG_2_bin.67	LinTernordMG_2	0.028	1.862	0	0	0	1396	89.212	0.004	0.002	0.001	0.001	0.001	0.835231	228/10000	4	3.87447e-299
SiePeasudMG_2_bin.68	LinTernordMG_2	1.721	14.227	0	0	0	43613	92.3661	0.086	0.071	0.062	0.055	0.05	0.897163	1024/10000	15	0
SiePeasudMG_2_bin.69	LinTernordMG_2	0.129	3.238	0	0	0	4052	90.2643	0.027	0.019	0.013	0.01	0.007	0.850555	334/10000	9	0
SiePeasudMG_2_bin.7	LinTernordMG_2	0.066	2.617	0	0	0	1045	0	0.002	0.001	0.001	0.001	0.001	0.840162	258/10000	9	0
SiePeasudMG_2_bin.71	LinTernordMG_2	0.62	18.754	0	0	0	16029	90.3608	0.008	0.007	0.007	0.006	0.006	0.860658	428/10000	11	0
SiePeasudMG_2_bin.73	LinTernordMG_2	11.377	17.31	0	1	21	562330	95.5721	0.524	0.491	0.468	0.451	0.436	0.919747	1726/10000	30	0
SiePeasudMG_2_bin.74	LinTernordMG_2	0	0	0	0	0	0	0	0	0	0	0	0	0.775502	48/10000	2	3.1487e-33
SiePeasudMG_2_bin.76	LinTernordMG_2	0	0.037	0	0	0	11	0	0	0	0	0	0	0.787916	67/10000	5	1.08206e-54
SiePeasudMG_2_bin.77	LinTernordMG_2	0.171	3.652	0	0	0	1403	0	0.008	0.006	0.006	0.005	0.004	0.861039	432/10000	10	0
SiePeasudMG_2_bin.79	LinTernordMG_2	0	0.011	0	0	0	3	0	0	0	0	0	0	0.733716	15/10000	1	4.5931e-05
SiePeasudMG_2_bin.8	LinTernordMG_2	0.381	5.067	0	0	0	6423	90.8728	0.019	0.016	0.014	0.013	0.012	0.853821	362/10000	14	0
SiePeasudMG_2_bin.82	LinTernordMG_2	0.026	1.225	0	0	0	865	0	0.002	0.001	0.001	0.001	0.001	0.839379	253/10000	4	0
SiePeasudMG_2_bin.83	LinTernordMG_2	0	0.016	0	0	0	4	0	0	0	0	0	0	0.805677	107/10000	12	5.51189e-107
SiePeasudMG_2_bin.84	LinTernordMG_2	0.001	0.114	0	0	0	61	0	0	0	0	0	0	0.766923	38/10000	1	3.58058e-23
SiePeasudMG_2_bin.85	LinTernordMG_2	1.259	12.309	0	0	0	21645	90.9917	0.054	0.045	0.039	0.035	0.032	0.882299	721/10000	19	0
SiePeasudMG_2_bin.86	LinTernordMG_2	1.756	19.805	0	0	0	44801	91.7693	0.063	0.053	0.046	0.041	0.037	0.887773	821/10000	15	0
SiePeasudMG_2_bin.87	LinTernordMG_2	0.21	6.559	0	0	0	3652	0	0.009	0.007	0.006	0.005	0.005	0.856011	382/10000	13	0
SiePeasudMG_2_bin.89	LinTernordMG_2	0.198	6.635	0	0	0	2291	0	0.006	0.004	0.004	0.003	0.003	0.851632	343/10000	4	0
SiePeasudMG_2_bin.92	LinTernordMG_2	0.011	1.276	0	0	0	405	0	0.001	0.001	0	0	0	0.851276	340/10000	3	0
SiePeasudMG_2_bin.93	LinTernordMG_2	0.08	3.529	0	0	0	2268	0	0.003	0.002	0.002	0.002	0.002	0.820273	156/10000	12	6.02248e-180
SiePeasudMG_2_bin.95	LinTernordMG_2	0.671	7.99	0	0	0	7390	0	0.024	0.02	0.019	0.018	0.017	0.854711	370/10000	18	0
TrioNunataknord_2_bin.100	LinTernordMG_2	0.214	9.639	0	0	0	1327	0	0.002	0.002	0.001	0.001	0.001	0.811665	125/10000	11	7.75822e-133
TrioNunataknord_2_bin.101	LinTernordMG_2	0.222	15.968	0	0	0	5184	90.241	0.012	0.007	0.005	0.003	0.003	0.857272	394/10000	4	0
TrioNunataknord_2_bin.117	LinTernordMG_2	0.05	6.817	0	0	0	1396	0	0.002	0	0	0	0	0.760672	32/10000	3	1.15293e-17
TrioNunataknord_2_bin.126	LinTernordMG_2	0.745	8.86	0	0	0	17696	91.7329	0.034	0.028	0.024	0.021	0.019	0.859098	412/10000	17	0
TrioNunataknord_2_bin.24	LinTernordMG_2	0.155	12.251	0	0	0	3935	0	0.002	0.001	0.001	0.001	0.001	0.810726	122/10000	10	1.91355e-128
TrioNunataknord_2_bin.27	LinTernordMG_2	0.043	0.992	0	0	0	490	0	0.009	0.006	0.004	0.003	0.002	0.868034	512/10000	4	0
TrioNunataknord_2_bin.28	LinTernordMG_2	0.114	4.926	0	0	0	3766	0	0.003	0.002	0.002	0.002	0.002	0.787352	66/10000	7	1.69338e-53
TrioNunataknord_2_bin.29	LinTernordMG_2	21.068	40.974	8	18	24	561459	96.6121	0.857	0.838	0.82	0.805	0.792	0.977388	6186/10000	13	0
TrioNunataknord_2_bin.33	LinTernordMG_2	0.267	10.249	0	0	0	3693	0	0.006	0.005	0.004	0.004	0.004	0.836434	235/10000	5	0
TrioNunataknord_2_bin.44	LinTernordMG_2	0.356	11.513	0	0	0	11541	91.4011	0.068	0.043	0.029	0.021	0.015	0.861792	440/10000	5	0
TrioNunataknord_2_bin.46	LinTernordMG_2	0.436	20.173	0	0	0	8690	90.5364	0.012	0.008	0.005	0.004	0.004	0.861229	434/10000	4	0
TrioNunataknord_2_bin.58	LinTernordMG_2	0.168	3.579	0	0	0	3286	90.6508	0.024	0.015	0.01	0.007	0.006	0.886361	794/10000	6	0
TrioNunataknord_2_bin.6	LinTernordMG_2	1.226	11.079	0	0	0	34772	91.5352	0.048	0.04	0.036	0.033	0.03	0.889292	851/10000	13	0
TrioNunataknord_2_bin.63	LinTernordMG_2	1.952	19.057	0	0	0	62964	92.4115	0.114	0.095	0.082	0.072	0.065	0.878211	654/10000	14	0
TrioNunataknord_2_bin.66	LinTernordMG_2	0.049	1.616	0	0	0	1017	0	0.004	0.003	0.003	0.002	0.002	0.858195	403/10000	3	0
TrioNunataknord_2_bin.69	LinTernordMG_2	0.063	1.667	0	0	0	2772	0	0.003	0.002	0.002	0.002	0.002	0.772295	44/10000	1	4.3605e-29
TrioNunataknord_2_bin.79	LinTernordMG_2	2.077	26.969	0	0	0	27877	92.5585	0.054	0.048	0.044	0.042	0.04	0.884404	758/10000	15	0
TrioNunataknord_2_bin.83	LinTernordMG_2	0.331	17.051	0	0	0	8063	0	0.005	0.004	0.003	0.003	0.002	0.846485	302/10000	5	0
TrioNunataknord_2_bin.9	LinTernordMG_2	0.119	2.647	0	0	0	1694	90.5345	0.021	0.012	0.008	0.006	0.004	0.863708	461/10000	3	0
TrioNunataknord_2_bin.90	LinTernordMG_2	0.063	1.666	0	0	0	2114	0	0.003	0.002	0.002	0.002	0.002	0.772295	44/10000	1	4.3605e-29
TrioNunataknord_2_bin.94	LinTernordMG_2	0.912	11.451	0	0	0	15782	91.0554	0.027	0.023	0.021	0.019	0.018	0.863797	462/10000	17	0
TrioNunataknord_2_bin.95	LinTernordMG_2	0.004	0.294	0	0	0	88	0	0.001	0	0	0	0	0.808448	115/10000	3	2.52974e-118
UniValnordMG_2_bin.12	LinTernordMG_2	17.666	86.365	0	1	3	630896	95.7488	0.503	0.361	0.272	0.223	0.198	0.941835	2841/10000	2	0
UniValnordMG_2_bin.14	LinTernordMG_2	4.799	4.21	2	4	7	140230	98.0828	0.868	0.797	0.711	0.607	0.493	0.983239	7012/10000	4	0
UniValnordMG_2_bin.23	LinTernordMG_2	18.853	39.868	0	12	32	536941	95.6712	0.655	0.632	0.616	0.6	0.587	0.931472	2252/10000	34	0
UniValnordMG_2_bin.36	LinTernordMG_2	97.988	50.862	86	104	118	2365114	99.6766	0.982	0.978	0.974	0.971	0.969	0.998349	9659/10000	86	0
UniValnordMG_2_bin.45	LinTernordMG_2	35.068	27.886	23	31	42	705772	98.9801	0.99	0.986	0.982	0.978	0.974	0.998541	9698/10000	20	0
UniValnordMG_2_bin.58	LinTernordMG_2	86.479	47.234	76	94	107	3239733	99.0618	0.936	0.931	0.928	0.925	0.922	0.995095	9019/10000	78	0
UniValnordMG_2_bin.66	LinTernordMG_2	0.978	6.189	0	0	0	24347	91.6837	0.082	0.067	0.059	0.052	0.047	0.886626	799/10000	15	0
UniValsudMG_2_bin.107	LinTernordMG_2	0.162	14.061	0	0	0	3441	0	0.002	0.001	0.001	0.001	0.001	0.845267	293/10000	5	0
UniValsudMG_2_bin.109	LinTernordMG_2	0.056	4.153	0	0	0	383	0	0.001	0	0	0	0	0.799067	90/10000	7	8.73114e-84
UniValsudMG_2_bin.113	LinTernordMG_2	0.31	16.747	0	0	0	5732	90.5281	0.009	0.005	0.004	0.003	0.003	0.857787	399/10000	4	0
UniValsudMG_2_bin.125	LinTernordMG_2	3.742	38.189	1	3	5	124356	96.8307	0.752	0.638	0.502	0.371	0.261	0.962822	4513/10000	3	0
UniValsudMG_2_bin.127	LinTernordMG_2	0	0.021	0	0	0	5	0	0	0	0	0	0	0.765949	37/10000	1	3.17592e-22
UniValsudMG_2_bin.16	LinTernordMG_2	0.242	13.739	0	0	0	7420	0	0.003	0.002	0.002	0.002	0.002	0.823637	170/10000	3	3.80333e-202
UniValsudMG_2_bin.19	LinTernordMG_2	0.002	0.154	0	0	0	46	0	0.001	0	0	0	0	0.808782	116/10000	4	9.29689e-120
UniValsudMG_2_bin.26	LinTernordMG_2	58.172	27.463	54	64	73	1762540	98.8543	0.914	0.903	0.897	0.893	0.891	0.990387	8164/10000	57	0
UniValsudMG_2_bin.27	LinTernordMG_2	17.37	37.743	0	10	17	636941	96.1868	0.706	0.686	0.669	0.653	0.636	0.951791	3543/10000	15	0
UniValsudMG_2_bin.44	LinTernordMG_2	3.963	21.674	0	0	0	85341	93.8124	0.121	0.108	0.1	0.093	0.088	0.901797	1141/10000	16	0
UniValsudMG_2_bin.59	LinTernordMG_2	2.288	33.95	0	0	0	45511	91.2957	0.043	0.035	0.031	0.028	0.027	0.878909	665/10000	16	0
UniValsudMG_2_bin.68	LinTernordMG_2	0.556	22.788	0	0	0	13093	90.2338	0.008	0.006	0.005	0.005	0.004	0.865284	479/10000	5	0
UniValsudMG_2_bin.71	LinTernordMG_2	0.327	8.241	0	0	0	6756	90.5296	0.013	0.009	0.007	0.006	0.005	0.85789	400/10000	4	0
UniValsudMG_2_bin.79	LinTernordMG_2	0.217	11.191	0	0	0	4847	0	0.003	0.002	0.002	0.002	0.002	0.850189	331/10000	5	0
BatPronordMG_2_bin.40	MtNewZealnordMG_2	29.429	56.585	0	0	33	1032366	95.8645	0.475	0.421	0.394	0.378	0.368	0.91414	1518/10000	32	0
BatPronordMG_2_bin.42	MtNewZealnordMG_2	172.556	165.257	66	177	267	5881147	98.119	0.879	0.868	0.864	0.862	0.861	0.984706	7235/10000	64	0
ButProsudMG_2_bin.21	MtNewZealnordMG_2	230.946	140.827	136	264	304	7998591	99.0387	0.972	0.969	0.965	0.962	0.959	0.99614	9220/10000	159	0
FingerMtnordMG_2_bin.101	MtNewZealnordMG_2	32.294	40.928	0	26	46	979138	95.6375	0.715	0.702	0.691	0.681	0.672	0.94351	2949/10000	41	0
FingerMtnordMG_2_bin.102	MtNewZealnordMG_2	0.327	4.576	0	0	0	7217	89.262	0.036	0.016	0.01	0.008	0.008	0.876847	633/10000	3	0
FingerMtnordMG_2_bin.103	MtNewZealnordMG_2	2.619	23.353	0	0	0	25146	92.1029	0.075	0.065	0.059	0.055	0.051	0.899242	1075/10000	11	0
FingerMtnordMG_2_bin.104	MtNewZealnordMG_2	7.224	60.237	0	0	2	172167	95.2958	0.328	0.252	0.196	0.155	0.125	0.907384	1299/10000	7	0
FingerMtnordMG_2_bin.109	MtNewZealnordMG_2	0	0.019	0	0	0	10	0	0	0	0	0	0	0.743837	20/10000	1	2.2326e-08
FingerMtnordMG_2_bin.118	MtNewZealnordMG_2	2.767	15.743	0	0	1	73142	95.4578	0.354	0.233	0.156	0.107	0.076	0.902507	1160/10000	4	0
FingerMtnordMG_2_bin.120	MtNewZealnordMG_2	2.631	33.247	0	0	0	48761	90.9597	0.045	0.04	0.036	0.034	0.032	0.857787	399/10000	15	0
FingerMtnordMG_2_bin.121	MtNewZealnordMG_2	5.927	36.191	0	1	2	342502	96.5248	0.519	0.344	0.236	0.176	0.142	0.948507	3295/10000	2	0
FingerMtnordMG_2_bin.125	MtNewZealnordMG_2	2.977	29.231	0	0	0	73428	92.9662	0.162	0.135	0.118	0.105	0.094	0.896786	1015/10000	12	0
FingerMtnordMG_2_bin.130	MtNewZealnordMG_2	1.56	7.054	0	0	0	42672	93.9766	0.232	0.185	0.153	0.127	0.107	0.89374	945/10000	9	0
FingerMtnordMG_2_bin.137	MtNewZealnordMG_2	10.186	36.623	0	0	5	291927	96.2593	0.483	0.404	0.344	0.299	0.263	0.93161	2259/10000	6	0
FingerMtnordMG_2_bin.15	MtNewZealnordMG_2	30.813	29.102	9	34	45	872413	95.582	0.86	0.839	0.825	0.814	0.804	0.964802	4712/10000	31	0
FingerMtnordMG_2_bin.17	MtNewZealnordMG_2	0.184	2.68	0	0	0	7574	90.9381	0.019	0.015	0.012	0.01	0.009	0.805677	107/10000	22	3.85348e-108
FingerMtnordMG_2_bin.18	MtNewZealnordMG_2	0.189	5.035	0	0	0	9489	91.3397	0.007	0.006	0.006	0.005	0.005	0.790621	72/10000	23	1.60092e-61
FingerMtnordMG_2_bin.19	MtNewZealnordMG_2	1.463	17.04	0	0	0	35592	91.4586	0.038	0.03	0.026	0.023	0.021	0.84554	295/10000	5	0
FingerMtnordMG_2_bin.22	MtNewZealnordMG_2	0.448	8.243	0	0	0	16982	93.4678	0.026	0.022	0.019	0.017	0.015	0.838902	250/10000	7	0
FingerMtnordMG_2_bin.24	MtNewZealnordMG_2	7.433	8.745	5	7	10	295559	99.7534	0.91	0.897	0.87	0.822	0.751	0.994652	8935/10000	6	0
FingerMtnordMG_2_bin.29	MtNewZealnordMG_2	8.592	61.636	0	0	4	244652	96.4496	0.471	0.394	0.324	0.265	0.216	0.920875	1771/10000	6	0
FingerMtnordMG_2_bin.3	MtNewZealnordMG_2	0.127	3.777	0	0	0	3366	0	0.007	0.006	0.005	0.004	0.004	0.815498	138/10000	5	9.96264e-154
FingerMtnordMG_2_bin.31	MtNewZealnordMG_2	0.591	10.336	0	0	0	13484	91.1437	0.044	0.033	0.027	0.021	0.017	0.870391	542/10000	7	0
FingerMtnordMG_2_bin.33	MtNewZealnordMG_2	1.149	9.311	0	0	0	33752	91.5713	0.08	0.055	0.044	0.037	0.033	0.866723	496/10000	5	0
FingerMtnordMG_2_bin.35	MtNewZealnordMG_2	0.011	0.116	0	0	0	269	89.1048	0.009	0.002	0	0	0	0.803466	101/10000	1	9.69351e-100
FingerMtnordMG_2_bin.38	MtNewZealnordMG_2	10.933	49.956	0	1	3	273652	97.5091	0.525	0.375	0.281	0.225	0.194	0.955434	3839/10000	2	0
FingerMtnordMG_2_bin.41	MtNewZealnordMG_2	2.586	25.515	0	0	0	49458	91.2067	0.068	0.056	0.048	0.043	0.039	0.866136	489/10000	18	0
FingerMtnordMG_2_bin.53	MtNewZealnordMG_2	2.7	13.957	0	0	2	84077	95.1566	0.325	0.256	0.21	0.176	0.149	0.919849	1730/10000	6	0
FingerMtnordMG_2_bin.57	MtNewZealnordMG_2	2.212	18.751	0	0	0	66614	92.3507	0.097	0.082	0.072	0.065	0.059	0.894009	951/10000	9	0
FingerMtnordMG_2_bin.58	MtNewZealnordMG_2	8.569	20.157	0	4	11	143775	96.8113	0.66	0.608	0.564	0.524	0.483	0.929828	2170/10000	13	0
FingerMtnordMG_2_bin.61	MtNewZealnordMG_2	1.021	22.524	0	0	0	24462	91.0804	0.033	0.025	0.021	0.017	0.015	0.871894	562/10000	7	0
FingerMtnordMG_2_bin.63	MtNewZealnordMG_2	0.405	17.794	0	0	0	18321	90.5855	0.005	0.004	0.004	0.004	0.003	0.858899	410/10000	4	0
FingerMtnordMG_2_bin.65	MtNewZealnordMG_2	0.312	2.172	0	0	0	12225	91.3503	0.066	0.045	0.032	0.024	0.019	0.878403	657/10000	5	0
FingerMtnordMG_2_bin.66	MtNewZealnordMG_2	1.362	5.155	0	0	0	59657	93.5514	0.175	0.145	0.125	0.109	0.095	0.89365	943/10000	10	0
FingerMtnordMG_2_bin.70	MtNewZealnordMG_2	0.827	8.163	0	0	0	26618	92.0131	0.068	0.053	0.045	0.039	0.035	0.886573	798/10000	9	0
FingerMtnordMG_2_bin.85	MtNewZealnordMG_2	0.503	5.63	0	0	0	24290	91.9217	0.069	0.054	0.043	0.036	0.03	0.881238	703/10000	6	0
FingerMtnordMG_2_bin.86	MtNewZealnordMG_2	0.822	17.649	0	0	0	36375	0	0.008	0.007	0.006	0.006	0.006	0.835923	232/10000	4	0
FingerMtnordMG_2_bin.89	MtNewZealnordMG_2	1.576	18.019	0	0	0	32976	0	0.017	0.015	0.015	0.014	0.014	0.851632	343/10000	11	0
FingerMtnordMG_2_bin.9	MtNewZealnordMG_2	1.107	3.905	0	0	0	49080	93.2351	0.161	0.126	0.105	0.091	0.079	0.895071	975/10000	7	0
FingerMtnordMG_2_bin.94	MtNewZealnordMG_2	7.151	38.402	0	0	0	164775	92.9434	0.187	0.167	0.155	0.146	0.139	0.901229	1126/10000	16	0
FingerMtnordMG_2_bin.96	MtNewZealnordMG_2	5.692	33.816	0	0	3	110287	96.1621	0.442	0.347	0.269	0.211	0.167	0.915301	1559/10000	7	0
FingerMtnordMG_2_bin.98	MtNewZealnordMG_2	0.396	4.855	0	0	0	7154	0	0.018	0.016	0.015	0.014	0.013	0.877437	642/10000	7	0
FingerMtnordMG_2_bin.99	MtNewZealnordMG_2	0.38	16.483	0	0	0	13007	90.9466	0.018	0.011	0.009	0.008	0.007	0.846352	301/10000	5	0
FingerMtsudMG_2_bin.2	MtNewZealnordMG_2	82.331	51.402	50	81	115	4237730	99.6011	0.926	0.92	0.914	0.91	0.905	0.995378	9073/10000	65	0
FingerMtsudMG_2_bin.24	MtNewZealnordMG_2	9.58	25.939	5	8	11	214191	97.7322	0.885	0.872	0.854	0.826	0.782	0.978246	6301/10000	8	0
FingerMtsudMG_2_bin.25	MtNewZealnordMG_2	113.875	109.236	100	119	134	2335849	98.7358	0.959	0.958	0.957	0.956	0.955	0.990537	8190/10000	88	0
FingerMtsudMG_2_bin.3	MtNewZealnordMG_2	181.561	89.856	177	203	225	6105495	99.5411	0.878	0.874	0.872	0.871	0.87	0.99233	8507/10000	180	0
FingerMtsudMG_2_bin.49	MtNewZealnordMG_2	10.213	22.87	3	6	12	295543	99.4776	0.966	0.902	0.819	0.726	0.638	0.995862	9166/10000	4	0
FingerMtsudMG_2_bin.5	MtNewZealnordMG_2	0.775	19.233	0	0	0	16266	91.9135	0.108	0.075	0.057	0.043	0.033	0.86244	447/10000	10	0
FingerMtsudMG_2_bin.50	MtNewZealnordMG_2	3.034	29.652	0	0	0	56368	92.2593	0.131	0.105	0.09	0.079	0.071	0.875508	613/10000	20	0
FingerMtsudMG_2_bin.66	MtNewZealnordMG_2	1.464	9.539	0	0	0	27068	92.3101	0.156	0.099	0.069	0.052	0.043	0.880394	689/10000	4	0
FingerMtsudMG_2_bin.74	MtNewZealnordMG_2	1.968	15.07	0	0	0	46268	91.7881	0.077	0.067	0.061	0.056	0.052	0.885664	781/10000	9	0
FingerMtsudMG_2_bin.9	MtNewZealnordMG_2	371.35	387.46	218	354	477	21487187	99.531	0.958	0.954	0.95	0.947	0.944	0.99582	9158/10000	269	0
KnobheadnordMG_2_bin.23	MtNewZealnordMG_2	18.594	73.114	0	0	2	551946	94.6176	0.382	0.269	0.226	0.211	0.201	0.942958	2913/10000	5	0
KnobheadnordMG_2_bin.34	MtNewZealnordMG_2	40.234	33.941	19	41	52	1099818	96.3117	0.841	0.835	0.829	0.824	0.819	0.963458	4576/10000	41	0
KnobheadnordMG_2_bin.72	MtNewZealnordMG_2	17.194	22.532	1	13	28	400253	96.932	0.776	0.741	0.714	0.691	0.668	0.958974	4149/10000	12	0
KnobheadsudMG_2_bin.2	MtNewZealnordMG_2	7.594	29.34	0	0	8	190339	95.9827	0.453	0.402	0.365	0.337	0.312	0.923708	1889/10000	16	0
KnobheadsudMG_2_bin.4	MtNewZealnordMG_2	424.764	352.317	356	483	550	8842692	95.2241	0.907	0.895	0.891	0.89	0.888	0.965834	4819/10000	441	0
KnobheadsudMG_2_bin.48	MtNewZealnordMG_2	1.253	9.542	0	0	0	35428	91.1387	0.059	0.049	0.043	0.039	0.036	0.855148	374/10000	11	0
KnobheadsudMG_2_bin.80	MtNewZealnordMG_2	244.185	327.907	38	174	380	10690360	97.2837	0.875	0.867	0.861	0.856	0.851	0.977875	6251/10000	113	0
LinTernordMG_2_bin.2	MtNewZealnordMG_2	5.2	30.415	0	3	5	160356	97.1633	0.739	0.635	0.504	0.372	0.261	0.968291	5083/10000	3	0
LinTernordMG_2_bin.21	MtNewZealnordMG_2	11.414	36.997	1	6	10	659412	96.5558	0.759	0.713	0.669	0.622	0.571	0.963307	4561/10000	6	0
LinTernordMG_2_bin.22	MtNewZealnordMG_2	18.006	43.061	9	15	20	540451	98.9297	0.887	0.872	0.856	0.841	0.825	0.990387	8164/10000	13	0
LinTernordMG_2_bin.4	MtNewZealnordMG_2	1.246	11.758	0	0	0	35474	91.4807	0.049	0.043	0.038	0.035	0.032	0.872262	567/10000	8	0
LinTernordMG_2_bin.44	MtNewZealnordMG_2	6.095	15.89	3	5	7	164414	99.1599	0.928	0.878	0.791	0.673	0.54	0.991726	8399/10000	5	0
LinTernordMG_2_bin.8	MtNewZealnordMG_2	8.263	38.326	0	0	4	260992	95.5373	0.362	0.322	0.294	0.27	0.249	0.919442	1714/10000	16	0
MtNewZealnordMG_2_bin.1	MtNewZealnordMG_2	18.201	21.698	12	15	19	396178	99.9941	1	0.999	0.998	0.996	0.993	1	10000/10000	13	0
MtNewZealnordMG_2_bin.10	MtNewZealnordMG_2	32.425	50.25	20	24	30	1207434	99.9832	1	1	0.999	0.999	0.998	1	10000/10000	21	0
MtNewZealnordMG_2_bin.105	MtNewZealnordMG_2	90.965	75.739	46	62	128	2150425	99.9639	1	1	1	1	1	1	10000/10000	42	0
MtNewZealnordMG_2_bin.16	MtNewZealnordMG_2	52.899	31.65	41	48	56	1506711	99.9973	1	1	1	1	1	0.999995	9999/10000	40	0
MtNewZealnordMG_2_bin.19	MtNewZealnordMG_2	28.989	55.842	19	23	28	692942	99.9863	1	1	1	1	1	1	10000/10000	20	0
MtNewZealnordMG_2_bin.25	MtNewZealnordMG_2	33.701	42.38	22	28	36	1129836	99.9929	1	1	0.999	0.999	0.998	1	10000/10000	22	0
MtNewZealnordMG_2_bin.27	MtNewZealnordMG_2	11.524	22.752	7	9	12	437183	99.9826	1	0.995	0.984	0.96	0.915	0.999986	9997/10000	8	0
MtNewZealnordMG_2_bin.7	MtNewZealnordMG_2	283.393	104.65	247	279	313	8295813	99.9993	1	1	1	1	1	1	10000/10000	217	0
MtNewZealnordMG_2_bin.74	MtNewZealnordMG_2	20.019	6.706	16	20	24	840671	99.9988	1	1	0.999	0.999	0.998	1	10000/10000	17	0
MtNewZealnordMG_2_bin.9	MtNewZealnordMG_2	17.683	28.057	13	17	20	278242	99.9994	1	1	0.999	0.999	0.997	0.999995	9999/10000	14	0
PudButnordMG_2_bin.11	MtNewZealnordMG_2	0.112	5.043	0	0	0	3836	0	0.005	0.003	0.002	0.002	0.002	0.799067	90/10000	2	9.47633e-85
PudButnordMG_2_bin.13	MtNewZealnordMG_2	0.061	6.402	0	0	0	1904	0	0	0	0	0	0	0.790094	71/10000	2	2.76388e-60
PudButnordMG_2_bin.2	MtNewZealnordMG_2	2.265	20.24	0	0	0	45446	91.4515	0.05	0.044	0.04	0.037	0.034	0.881713	711/10000	10	0
PudButnordMG_2_bin.22	MtNewZealnordMG_2	9.67	24.031	0	0	15	517905	95.2084	0.445	0.422	0.404	0.388	0.374	0.913301	1489/10000	28	0
PudButnordMG_2_bin.3	MtNewZealnordMG_2	5.657	35.767	0	0	0	323246	93.5574	0.188	0.153	0.131	0.116	0.105	0.910251	1388/10000	8	0
PudButnordMG_2_bin.36	MtNewZealnordMG_2	0.129	0.481	0	0	0	4637	91.0125	0.096	0.024	0.005	0.002	0	0.876383	626/10000	1	0
PudButnordMG_2_bin.42	MtNewZealnordMG_2	0.004	0.103	0	0	0	138	0	0.002	0.001	0.001	0	0	0.759523	31/10000	3	4.29631e-17
PudButnordMG_2_bin.5	MtNewZealnordMG_2	2.019	10.591	0	0	0	28142	92.7592	0.152	0.125	0.108	0.095	0.086	0.904036	1202/10000	14	0
PudButnordMG_2_bin.53	MtNewZealnordMG_2	0.608	2.33	0	0	0	18839	92.2615	0.137	0.112	0.088	0.067	0.049	0.90745	1301/10000	4	0
PudButnordMG_2_bin.56	MtNewZealnordMG_2	1.152	9.979	0	0	0	49643	92.9686	0.144	0.118	0.1	0.087	0.076	0.887567	817/10000	9	0
PudButnordMG_2_bin.59	MtNewZealnordMG_2	0	0.026	0	0	0	8	0	0	0	0	0	0	0.796446	84/10000	3	8.13668e-77
PudButnordMG_2_bin.60	MtNewZealnordMG_2	0.003	0.144	0	0	0	123	0	0.001	0.001	0	0	0	0.74722	22/10000	3	8.32983e-10
PudButnordMG_2_bin.67	MtNewZealnordMG_2	0.121	9.441	0	0	0	3252	0	0.002	0.002	0.001	0.001	0.001	0.852452	350/10000	5	0
PudButnordMG_2_bin.81	MtNewZealnordMG_2	2.148	31.177	0	0	0	55768	91.953	0.052	0.044	0.041	0.038	0.036	0.878909	665/10000	8	0
PudButnordMG_2_bin.85	MtNewZealnordMG_2	5.734	30.656	0	0	2	175530	95.6067	0.403	0.264	0.175	0.121	0.089	0.909875	1376/10000	3	0
PudButnordMG_2_bin.88	MtNewZealnordMG_2	1.014	9.048	0	0	0	24801	92.5785	0.113	0.07	0.047	0.034	0.026	0.870847	548/10000	3	0
PudButnordMG_2_bin.90	MtNewZealnordMG_2	8.129	44.666	0	2	5	422154	97.3699	0.71	0.598	0.484	0.385	0.305	0.966034	4840/10000	3	0
PudButnordMG_2_bin.95	MtNewZealnordMG_2	1.849	8.519	0	0	0	89305	94.0208	0.21	0.178	0.156	0.138	0.122	0.892738	923/10000	13	0
PudButsudMG_2_bin.15	MtNewZealnordMG_2	2.958	27.503	0	0	0	80402	92.918	0.13	0.086	0.06	0.046	0.037	0.875303	610/10000	3	0
PudButsudMG_2_bin.38	MtNewZealnordMG_2	147.987	148.029	15	143	250	4669932	95.8231	0.794	0.783	0.778	0.774	0.771	0.954125	3730/10000	72	0
PudButsudMG_2_bin.44	MtNewZealnordMG_2	31.774	58.05	0	0	38	1117335	95.6609	0.451	0.414	0.396	0.385	0.376	0.91081	1406/10000	52	0
PudButsudMG_2_bin.46	MtNewZealnordMG_2	0.8	5.833	0	0	0	21667	93.1612	0.151	0.109	0.082	0.062	0.048	0.868754	521/10000	9	0
PudButsudMG_2_bin.57	MtNewZealnordMG_2	3.395	43.16	0	0	0	81058	92.0435	0.105	0.084	0.071	0.063	0.056	0.901985	1146/10000	8	0
PudButsudMG_2_bin.59	MtNewZealnordMG_2	279.86	338.549	89	193	399	16844656	99.4686	0.972	0.969	0.967	0.965	0.964	0.996657	9321/10000	94	0
PudButsudMG_2_bin.62	MtNewZealnordMG_2	52.05	35.217	40	57	68	1848605	98.5677	0.898	0.887	0.879	0.87	0.862	0.990004	8098/10000	49	0
PudButsudMG_2_bin.78	MtNewZealnordMG_2	2.848	25.174	0	0	0	70712	92.2866	0.105	0.088	0.078	0.071	0.065	0.890712	880/10000	16	0
RickerHillsnord_2_bin.11	MtNewZealnordMG_2	0.243	0.926	0	0	0	6715	92.0735	0.098	0.06	0.036	0.022	0.012	0.868436	517/10000	3	0
RickerHillsnord_2_bin.17	MtNewZealnordMG_2	3.256	30.517	0	0	0	69560	91.8392	0.08	0.069	0.062	0.056	0.053	0.894009	951/10000	10	0
RickerHillsnord_2_bin.19	MtNewZealnordMG_2	6.58	37.394	0	0	3	129305	95.6075	0.432	0.334	0.283	0.249	0.222	0.928984	2129/10000	6	0
RickerHillsnord_2_bin.23	MtNewZealnordMG_2	2.498	32.224	0	0	0	79748	92.3951	0.046	0.04	0.035	0.032	0.03	0.879347	672/10000	8	0
RickerHillsnord_2_bin.25	MtNewZealnordMG_2	3.14	22.113	0	0	0	108969	93.0975	0.173	0.149	0.131	0.119	0.109	0.886361	794/10000	22	0
RickerHillsnord_2_bin.26	MtNewZealnordMG_2	2.472	15.989	0	0	0	57237	92.7988	0.129	0.111	0.099	0.089	0.082	0.903965	1200/10000	11	0
RickerHillsnord_2_bin.29	MtNewZealnordMG_2	2.707	23.092	0	0	0	43315	91.4376	0.066	0.056	0.05	0.047	0.044	0.890519	876/10000	12	0
RickerHillsnord_2_bin.30	MtNewZealnordMG_2	33.085	35.504	17	25	41	738815	97.9465	0.929	0.919	0.909	0.9	0.892	0.988527	7848/10000	18	0
RickerHillsnord_2_bin.32	MtNewZealnordMG_2	1.438	15.719	0	0	0	39912	92.3149	0.1	0.08	0.068	0.059	0.052	0.900499	1107/10000	7	0
RickerHillsnord_2_bin.34	MtNewZealnordMG_2	13.656	59.472	0	0	2	819942	94.4777	0.293	0.265	0.245	0.229	0.217	0.928546	2108/10000	16	0
RickerHillsnord_2_bin.36	MtNewZealnordMG_2	4.422	33.413	0	0	0	174857	92.9503	0.095	0.083	0.075	0.069	0.064	0.894054	952/10000	14	0
RickerHillsnord_2_bin.37	MtNewZealnordMG_2	1.978	19.558	0	0	0	48871	92.158	0.069	0.055	0.047	0.042	0.039	0.896108	999/10000	8	0
RickerHillsnord_2_bin.48	MtNewZealnordMG_2	12.899	12.805	9	12	15	328590	99.9337	0.994	0.987	0.979	0.966	0.947	0.999459	9887/10000	10	0
RickerHillsnord_2_bin.50	MtNewZealnordMG_2	4.847	11.547	0	0	6	100199	96.0159	0.445	0.387	0.347	0.317	0.292	0.926333	2005/10000	9	0
[truncated: 2,843 more rows]

## Sheet: S2
MAG	FileName	IsCBSRepresentative	CBSRepresentative	Completeness	Contamination	Length	N50	GTDBClassification	GTDBHumanClassification	Domain	Phylum	Class	Order	Family	Genus	Species
BatPronordMG_2_bin.13	BatPronordMG_2_bin.13.fa	FALSE	ButProsudMG_2_bin.21	99.76	3.16	4555097	31708	d__Bacteria;p__Actinobacteriota;c__Actinobacteria;o__Corynebacteriales;f__Corynebacteriaceae;g__;s__	Bacteria;Actinobacteriota;Actinobacteria;Corynebacteriales;Corynebacteriaceae;;	Bacteria	Actinobacteriota	Actinobacteria	Corynebacteriales	Corynebacteriaceae
BatPronordMG_2_bin.17	BatPronordMG_2_bin.17.fa	FALSE	PudButsudMG_2_bin.59	52.81	5.28	4233097	4906	d__Bacteria;p__Chloroflexota;c__UBA5177;o__;f__;g__;s__	Bacteria;Chloroflexota;UBA5177;;;;	Bacteria	Chloroflexota	UBA5177
BatPronordMG_2_bin.21	BatPronordMG_2_bin.21.fa	FALSE	RickerHillsnord_2_bin.30	76.03	1.89	2902372	5643	d__Bacteria;p__Actinobacteriota;c__Actinobacteria;o__Frankiales;f__;g__;s__	Bacteria;Actinobacteriota;Actinobacteria;Frankiales;;;	Bacteria	Actinobacteriota	Actinobacteria	Frankiales
BatPronordMG_2_bin.23	BatPronordMG_2_bin.23.fa	FALSE	FingerMtsudMG_2_bin.49	98.01	1.99	4432961	25892	d__Bacteria;p__Proteobacteria;c__Alphaproteobacteria;o__Acetobacterales;f__Acetobacteraceae;g__70-18;s__	Bacteria;Proteobacteria;Alphaproteobacteria;Acetobacterales;Acetobacteraceae;70-18;	Bacteria	Proteobacteria	Alphaproteobacteria	Acetobacterales	Acetobacteraceae	70-18
BatPronordMG_2_bin.27	BatPronordMG_2_bin.27.fa	FALSE	RicNunsandstonMG_4_bin.94	99.37	1.89	7980233	22996	d__Bacteria;p__Chloroflexota;c__Chloroflexia;o__;f__;g__;s__	Bacteria;Chloroflexota;Chloroflexia;;;;	Bacteria	Chloroflexota	Chloroflexia
BatPronordMG_2_bin.40	BatPronordMG_2_bin.40.fa	TRUE	BatPronordMG_2_bin.40	97.22	1.39	5163541	76875	d__Bacteria;p__Armatimonadota;c__Chthonomonadetes;o__;f__;g__;s__	Bacteria;Armatimonadota;Chthonomonadetes;;;;	Bacteria	Armatimonadota	Chthonomonadetes
BatPronordMG_2_bin.42	BatPronordMG_2_bin.42.fa	TRUE	BatPronordMG_2_bin.42	98.68	1.98	5008009	70280	d__Bacteria;p__Chloroflexota;c__UBA5177;o__UBA5177;f__UBA5177;g__;s__	Bacteria;Chloroflexota;UBA5177;UBA5177;UBA5177;;	Bacteria	Chloroflexota	UBA5177	UBA5177	UBA5177
BatPronordMG_2_bin.8	BatPronordMG_2_bin.8.fa	FALSE	MtNewZealnordMG_2_bin.9	98.72	2.14	2554302	63185	d__Bacteria;p__Actinobacteriota;c__Acidimicrobiia;o__Acidimicrobiales;f__UBA7543;g__;s__	Bacteria;Actinobacteriota;Acidimicrobiia;Acidimicrobiales;UBA7543;;	Bacteria	Actinobacteriota	Acidimicrobiia	Acidimicrobiales	UBA7543
ButProsudMG_2_bin.10	ButProsudMG_2_bin.10.fa	FALSE	SiePeanordMG_2_bin.60	85.75	3.24	5408535	7040	d__Bacteria;p__Actinobacteriota;c__Actinobacteria;o__Frankiales;f__Frankiaceae;g__;s__	Bacteria;Actinobacteriota;Actinobacteria;Frankiales;Frankiaceae;;	Bacteria	Actinobacteriota	Actinobacteria	Frankiales	Frankiaceae
ButProsudMG_2_bin.19	ButProsudMG_2_bin.19.fa	FALSE	UniValsudMG_2_bin.26	69.19	3.89	3109318	6404	d__Bacteria;p__Bacteroidota;c__Bacteroidia;o__Sphingobacteriales;f__Sphingobacteriaceae;g__;s__	Bacteria;Bacteroidota;Bacteroidia;Sphingobacteriales;Sphingobacteriaceae;;	Bacteria	Bacteroidota	Bacteroidia	Sphingobacteriales	Sphingobacteriaceae
ButProsudMG_2_bin.2	ButProsudMG_2_bin.2.fa	FALSE	UniValnordMG_2_bin.36	90.34	2.16	3484847	13798	d__Bacteria;p__Actinobacteriota;c__Actinobacteria;o__Jiangellales;f__;g__;s__	Bacteria;Actinobacteriota;Actinobacteria;Jiangellales;;;	Bacteria	Actinobacteriota	Actinobacteria	Jiangellales
ButProsudMG_2_bin.21	ButProsudMG_2_bin.21.fa	TRUE	ButProsudMG_2_bin.21	100	1.7	5082936	57207	d__Bacteria;p__Actinobacteriota;c__Actinobacteria;o__Corynebacteriales;f__Corynebacteriaceae;g__;s__	Bacteria;Actinobacteriota;Actinobacteria;Corynebacteriales;Corynebacteriaceae;;	Bacteria	Actinobacteriota	Actinobacteria	Corynebacteriales	Corynebacteriaceae
ButProsudMG_2_bin.24	ButProsudMG_2_bin.24.fa	FALSE	PudButsudMG_2_bin.62	63.34	0.59	3037733	5258	d__Bacteria;p__Actinobacteriota;c__Actinobacteria;o__Corynebacteriales;f__Nakamurellaceae;g__Nakamurella;s__	Bacteria;Actinobacteriota;Actinobacteria;Corynebacteriales;Nakamurellaceae;Nakamurella;	Bacteria	Actinobacteriota	Actinobacteria	Corynebacteriales	Nakamurellaceae	Nakamurella
FingerMtnordMG_2_bin.101	FingerMtnordMG_2_bin.101.fa	TRUE	FingerMtnordMG_2_bin.101	97.22	2.78	4451761	46365	d__Bacteria;p__Armatimonadota;c__Chthonomonadetes;o__;f__;g__;s__	Bacteria;Armatimonadota;Chthonomonadetes;;;;	Bacteria	Armatimonadota	Chthonomonadetes
FingerMtnordMG_2_bin.102	FingerMtnordMG_2_bin.102.fa	TRUE	FingerMtnordMG_2_bin.102	98.56	1.55	3238311	63251	d__Bacteria;p__Proteobacteria;c__Alphaproteobacteria;o__Sphingomonadales;f__Sphingomonadaceae;g__Sphingomonas;s__	Bacteria;Proteobacteria;Alphaproteobacteria;Sphingomonadales;Sphingomonadaceae;Sphingomonas;	Bacteria	Proteobacteria	Alphaproteobacteria	Sphingomonadales	Sphingomonadaceae	Sphingomonas
FingerMtnordMG_2_bin.103	FingerMtnordMG_2_bin.103.fa	TRUE	FingerMtnordMG_2_bin.103	50.05	0.75	1411310	4282	d__Bacteria;p__Actinobacteriota;c__Actinobacteria;o__Frankiales;f__Frankiaceae;g__;s__	Bacteria;Actinobacteriota;Actinobacteria;Frankiales;Frankiaceae;;	Bacteria	Actinobacteriota	Actinobacteria	Frankiales	Frankiaceae
FingerMtnordMG_2_bin.104	FingerMtnordMG_2_bin.104.fa	TRUE	FingerMtnordMG_2_bin.104	95.1	0	3497040	50030	d__Bacteria;p__Actinobacteriota;c__Thermoleophilia;o__Solirubrobacterales;f__Solirubrobacteraceae;g__;s__	Bacteria;Actinobacteriota;Thermoleophilia;Solirubrobacterales;Solirubrobacteraceae;;	Bacteria	Actinobacteriota	Thermoleophilia	Solirubrobacterales	Solirubrobacteraceae
FingerMtnordMG_2_bin.109	FingerMtnordMG_2_bin.109.fa	TRUE	FingerMtnordMG_2_bin.109	81	2	3861869	19456	d__Bacteria;p__Cyanobacteriota;c__Cyanobacteriia;o__Cyanobacteriales;f__Chroococcidiopsidaceae;g__;s__	Bacteria;Cyanobacteriota;Cyanobacteriia;Cyanobacteriales;Chroococcidiopsidaceae;;	Bacteria	Cyanobacteriota	Cyanobacteriia	Cyanobacteriales	Chroococcidiopsidaceae
FingerMtnordMG_2_bin.111	FingerMtnordMG_2_bin.111.fa	FALSE	RicNunsandstonMG_4_bin.58	84.67	0.24	3443338	9607	d__Bacteria;p__Actinobacteriota;c__Thermoleophilia;o__Solirubrobacterales;f__Solirubrobacteraceae;g__Conexibacter;s__	Bacteria;Actinobacteriota;Thermoleophilia;Solirubrobacterales;Solirubrobacteraceae;Conexibacter;	Bacteria	Actinobacteriota	Thermoleophilia	Solirubrobacterales	Solirubrobacteraceae	Conexibacter
FingerMtnordMG_2_bin.118	FingerMtnordMG_2_bin.118.fa	TRUE	FingerMtnordMG_2_bin.118	85.98	2.78	3885134	10777	d__Bacteria;p__Armatimonadota;c__Chthonomonadetes;o__;f__;g__;s__	Bacteria;Armatimonadota;Chthonomonadetes;;;;	Bacteria	Armatimonadota	Chthonomonadetes
FingerMtnordMG_2_bin.120	FingerMtnordMG_2_bin.120.fa	TRUE	FingerMtnordMG_2_bin.120	79.14	0.93	2720286	89639	d__Bacteria;p__UBP12;c__UBA5184;o__UBA5184;f__UBA5184;g__;s__	Bacteria;UBP12;UBA5184;UBA5184;UBA5184;;	Bacteria	UBP12	UBA5184	UBA5184	UBA5184
FingerMtnordMG_2_bin.121	FingerMtnordMG_2_bin.121.fa	TRUE	FingerMtnordMG_2_bin.121	89.8	3.98	8499504	16384	d__Bacteria;p__Proteobacteria;c__Alphaproteobacteria;o__Acetobacterales;f__Acetobacteraceae;g__70-18;s__	Bacteria;Proteobacteria;Alphaproteobacteria;Acetobacterales;Acetobacteraceae;70-18;	Bacteria	Proteobacteria	Alphaproteobacteria	Acetobacterales	Acetobacteraceae	70-18
FingerMtnordMG_2_bin.125	FingerMtnordMG_2_bin.125.fa	TRUE	FingerMtnordMG_2_bin.125	98.74	1.08	3623205	64138	d__Bacteria;p__Actinobacteriota;c__Actinobacteria;o__Jiangellales;f__Jiangellaceae;g__;s__	Bacteria;Actinobacteriota;Actinobacteria;Jiangellales;Jiangellaceae;;	Bacteria	Actinobacteriota	Actinobacteria	Jiangellales	Jiangellaceae
FingerMtnordMG_2_bin.126	FingerMtnordMG_2_bin.126.fa	FALSE	RicNunsandstonMG_3_bin.11	56.3	1.16	3095745	4911	d__Bacteria;p__Planctomycetota;c__Planctomycetes;o__Isosphaerales;f__Isosphaeraceae;g__;s__	Bacteria;Planctomycetota;Planctomycetes;Isosphaerales;Isosphaeraceae;;	Bacteria	Planctomycetota	Planctomycetes	Isosphaerales	Isosphaeraceae
FingerMtnordMG_2_bin.127	FingerMtnordMG_2_bin.127.fa	FALSE	FingerMtsudMG_2_bin.2	95.91	8.09	7085680	26691	d__Bacteria;p__Proteobacteria;c__Alphaproteobacteria;o__Rhizobiales;f__Beijerinckiaceae;g__;s__	Bacteria;Proteobacteria;Alphaproteobacteria;Rhizobiales;Beijerinckiaceae;;	Bacteria	Proteobacteria	Alphaproteobacteria	Rhizobiales	Beijerinckiaceae
FingerMtnordMG_2_bin.130	FingerMtnordMG_2_bin.130.fa	TRUE	FingerMtnordMG_2_bin.130	89.88	2.78	4021029	33770	d__Bacteria;p__Armatimonadota;c__Chthonomonadetes;o__;f__;g__;s__	Bacteria;Armatimonadota;Chthonomonadetes;;;;	Bacteria	Armatimonadota	Chthonomonadetes
FingerMtnordMG_2_bin.137	FingerMtnordMG_2_bin.137.fa	TRUE	FingerMtnordMG_2_bin.137	75.93	2.25	4210472	6472	d__Bacteria;p__Actinobacteriota;c__Actinobacteria;o__Frankiales;f__Frankiaceae;g__;s__	Bacteria;Actinobacteriota;Actinobacteria;Frankiales;Frankiaceae;;	Bacteria	Actinobacteriota	Actinobacteria	Frankiales	Frankiaceae
FingerMtnordMG_2_bin.15	FingerMtnordMG_2_bin.15.fa	TRUE	FingerMtnordMG_2_bin.15	88.63	9.68	4159174	11257	d__Bacteria;p__Proteobacteria;c__Alphaproteobacteria;o__Acetobacterales;f__Acetobacteraceae;g__70-18;s__	Bacteria;Proteobacteria;Alphaproteobacteria;Acetobacterales;Acetobacteraceae;70-18;	Bacteria	Proteobacteria	Alphaproteobacteria	Acetobacterales	Acetobacteraceae	70-18
FingerMtnordMG_2_bin.16	FingerMtnordMG_2_bin.16.fa	FALSE	MtNewZealnordMG_2_bin.19	93.89	1.85	3333973	43229	d__Bacteria;p__UBP12;c__UBA5184;o__UBA5184;f__UBA5184;g__;s__	Bacteria;UBP12;UBA5184;UBA5184;UBA5184;;	Bacteria	UBP12	UBA5184	UBA5184	UBA5184
FingerMtnordMG_2_bin.17	FingerMtnordMG_2_bin.17.fa	TRUE	FingerMtnordMG_2_bin.17	99.17	3.96	6046028	86762	d__Bacteria;p__Chloroflexota;c__Ktedonobacteria;o__Ktedonobacterales;f__Ktedonobacteraceae;g__UBA7999;s__	Bacteria;Chloroflexota;Ktedonobacteria;Ktedonobacterales;Ktedonobacteraceae;UBA7999;	Bacteria	Chloroflexota	Ktedonobacteria	Ktedonobacterales	Ktedonobacteraceae	UBA7999
FingerMtnordMG_2_bin.18	FingerMtnordMG_2_bin.18.fa	TRUE	FingerMtnordMG_2_bin.18	98.18	6.44	7392838	117334	d__Bacteria;p__Chloroflexota;c__Ktedonobacteria;o__Ktedonobacterales;f__Ktedonobacteraceae;g__UBA7999;s__	Bacteria;Chloroflexota;Ktedonobacteria;Ktedonobacterales;Ktedonobacteraceae;UBA7999;	Bacteria	Chloroflexota	Ktedonobacteria	Ktedonobacterales	Ktedonobacteraceae	UBA7999
FingerMtnordMG_2_bin.19	FingerMtnordMG_2_bin.19.fa	TRUE	FingerMtnordMG_2_bin.19	92.78	0.85	3571941	106308	d__Bacteria;p__Acidobacteriota;c__Acidobacteriae;o__Acidobacteriales;f__Acidobacteriaceae;g__;s__	Bacteria;Acidobacteriota;Acidobacteriae;Acidobacteriales;Acidobacteriaceae;;	Bacteria	Acidobacteriota	Acidobacteriae	Acidobacteriales	Acidobacteriaceae
FingerMtnordMG_2_bin.22	FingerMtnordMG_2_bin.22.fa	TRUE	FingerMtnordMG_2_bin.22	97.97	0	5562730	87754	d__Bacteria;p__Acidobacteriota;c__Acidobacteriae;o__Solibacterales;f__Solibacteraceae;g__KBS-96;s__	Bacteria;Acidobacteriota;Acidobacteriae;Solibacterales;Solibacteraceae;KBS-96;	Bacteria	Acidobacteriota	Acidobacteriae	Solibacterales	Solibacteraceae	KBS-96
FingerMtnordMG_2_bin.24	FingerMtnordMG_2_bin.24.fa	TRUE	FingerMtnordMG_2_bin.24	85.94	0	5826684	20780	d__Bacteria;p__Acidobacteriota;c__Acidobacteriae;o__Solibacterales;f__Solibacteraceae;g__KBS-96;s__	Bacteria;Acidobacteriota;Acidobacteriae;Solibacterales;Solibacteraceae;KBS-96;	Bacteria	Acidobacteriota	Acidobacteriae	Solibacterales	Solibacteraceae	KBS-96
FingerMtnordMG_2_bin.26	FingerMtnordMG_2_bin.26.fa	FALSE	RicNunsandstonMG_3_bin.47	51.72	1.72	1484594	4994	d__Bacteria;p__Proteobacteria;c__Alphaproteobacteria;o__Sphingomonadales;f__Sphingomonadaceae;g__;s__	Bacteria;Proteobacteria;Alphaproteobacteria;Sphingomonadales;Sphingomonadaceae;;	Bacteria	Proteobacteria	Alphaproteobacteria	Sphingomonadales	Sphingomonadaceae
FingerMtnordMG_2_bin.27	FingerMtnordMG_2_bin.27.fa	FALSE	RicNunsandstonMG_4_bin.86	87.18	3.79	3315339	12756	d__Bacteria;p__Actinobacteriota;c__Thermoleophilia;o__Solirubrobacterales;f__Solirubrobacteraceae;g__;s__	Bacteria;Actinobacteriota;Thermoleophilia;Solirubrobacterales;Solirubrobacteraceae;;	Bacteria	Actinobacteriota	Thermoleophilia	Solirubrobacterales	Solirubrobacteraceae
FingerMtnordMG_2_bin.29	FingerMtnordMG_2_bin.29.fa	TRUE	FingerMtnordMG_2_bin.29	98.28	6.58	4177634	33668	d__Bacteria;p__Actinobacteriota;c__Thermoleophilia;o__Solirubrobacterales;f__Solirubrobacteraceae;g__;s__	Bacteria;Actinobacteriota;Thermoleophilia;Solirubrobacterales;Solirubrobacteraceae;;	Bacteria	Actinobacteriota	Thermoleophilia	Solirubrobacterales	Solirubrobacteraceae
FingerMtnordMG_2_bin.3	FingerMtnordMG_2_bin.3.fa	TRUE	FingerMtnordMG_2_bin.3	87.51	1.74	3908576	15539	d__Bacteria;p__Acidobacteriota;c__Acidobacteriae;o__Solibacterales;f__Solibacteraceae;g__KBS-96;s__	Bacteria;Acidobacteriota;Acidobacteriae;Solibacterales;Solibacteraceae;KBS-96;	Bacteria	Acidobacteriota	Acidobacteriae	Solibacterales	Solibacteraceae	KBS-96
FingerMtnordMG_2_bin.31	FingerMtnordMG_2_bin.31.fa	TRUE	FingerMtnordMG_2_bin.31	84.97	1.28	3355248	8098	d__Bacteria;p__Actinobacteriota;c__Acidimicrobiia;o__Microtrichales;f__;g__;s__	Bacteria;Actinobacteriota;Acidimicrobiia;Microtrichales;;;	Bacteria	Actinobacteriota	Acidimicrobiia	Microtrichales
FingerMtnordMG_2_bin.33	FingerMtnordMG_2_bin.33.fa	TRUE	FingerMtnordMG_2_bin.33	95.37	0.93	4326138	94057	d__Bacteria;p__Armatimonadota;c__Chthonomonadetes;o__;f__;g__;s__	Bacteria;Armatimonadota;Chthonomonadetes;;;;	Bacteria	Armatimonadota	Chthonomonadetes
FingerMtnordMG_2_bin.35	FingerMtnordMG_2_bin.35.fa	TRUE	FingerMtnordMG_2_bin.35	77.68	1.44	3701550	13311	d__Bacteria;p__Cyanobacteriota;c__Cyanobacteriia;o__Cyanobacteriales;f__Chroococcidiopsidaceae;g__;s__	Bacteria;Cyanobacteriota;Cyanobacteriia;Cyanobacteriales;Chroococcidiopsidaceae;;	Bacteria	Cyanobacteriota	Cyanobacteriia	Cyanobacteriales	Chroococcidiopsidaceae
FingerMtnordMG_2_bin.37	FingerMtnordMG_2_bin.37.fa	FALSE	RicNunsandstonMG_3_bin.43	69.48	1.74	2783531	6815	d__Bacteria;p__Proteobacteria;c__Alphaproteobacteria;o__Acetobacterales;f__Acetobacteraceae;g__70-18;s__	Bacteria;Proteobacteria;Alphaproteobacteria;Acetobacterales;Acetobacteraceae;70-18;	Bacteria	Proteobacteria	Alphaproteobacteria	Acetobacterales	Acetobacteraceae	70-18
FingerMtnordMG_2_bin.38	FingerMtnordMG_2_bin.38.fa	TRUE	FingerMtnordMG_2_bin.38	88.86	6.02	3678700	29606	d__Bacteria;p__UBP12;c__UBA5184;o__UBA5184;f__UBA5184;g__;s__	Bacteria;UBP12;UBA5184;UBA5184;UBA5184;;	Bacteria	UBP12	UBA5184	UBA5184	UBA5184
FingerMtnordMG_2_bin.41	FingerMtnordMG_2_bin.41.fa	TRUE	FingerMtnordMG_2_bin.41	95.83	1.85	2813545	231002	d__Bacteria;p__UBP12;c__UBA5184;o__UBA5184;f__UBA5184;g__;s__	Bacteria;UBP12;UBA5184;UBA5184;UBA5184;;	Bacteria	UBP12	UBA5184	UBA5184	UBA5184
FingerMtnordMG_2_bin.53	FingerMtnordMG_2_bin.53.fa	TRUE	FingerMtnordMG_2_bin.53	81.71	7.84	4585183	22530	d__Bacteria;p__Proteobacteria;c__Alphaproteobacteria;o__Acetobacterales;f__Acetobacteraceae;g__70-18;s__	Bacteria;Proteobacteria;Alphaproteobacteria;Acetobacterales;Acetobacteraceae;70-18;	Bacteria	Proteobacteria	Alphaproteobacteria	Acetobacterales	Acetobacteraceae	70-18
FingerMtnordMG_2_bin.56	FingerMtnordMG_2_bin.56.fa	FALSE	UniValsudMG_2_bin.107	92.1	3.7	3196487	35803	d__Bacteria;p__UBP12;c__UBA5184;o__UBA5184;f__UBA5184;g__;s__	Bacteria;UBP12;UBA5184;UBA5184;UBA5184;;	Bacteria	UBP12	UBA5184	UBA5184	UBA5184
FingerMtnordMG_2_bin.57	FingerMtnordMG_2_bin.57.fa	TRUE	FingerMtnordMG_2_bin.57	94.78	1.79	4430535	17476	d__Bacteria;p__Proteobacteria;c__Alphaproteobacteria;o__Acetobacterales;f__Acetobacteraceae;g__;s__	Bacteria;Proteobacteria;Alphaproteobacteria;Acetobacterales;Acetobacteraceae;;	Bacteria	Proteobacteria	Alphaproteobacteria	Acetobacterales	Acetobacteraceae
FingerMtnordMG_2_bin.58	FingerMtnordMG_2_bin.58.fa	TRUE	FingerMtnordMG_2_bin.58	94.53	1.03	2464987	33088	d__Bacteria;p__Actinobacteriota;c__Thermoleophilia;o__Solirubrobacterales;f__Solirubrobacteraceae;g__;s__	Bacteria;Actinobacteriota;Thermoleophilia;Solirubrobacterales;Solirubrobacteraceae;;	Bacteria	Actinobacteriota	Thermoleophilia	Solirubrobacterales	Solirubrobacteraceae
FingerMtnordMG_2_bin.61	FingerMtnordMG_2_bin.61.fa	TRUE	FingerMtnordMG_2_bin.61	95.73	6.7	3415374	22435	d__Bacteria;p__Actinobacteriota;c__Acidimicrobiia;o__Acidimicrobiales;f__;g__;s__	Bacteria;Actinobacteriota;Acidimicrobiia;Acidimicrobiales;;;	Bacteria	Actinobacteriota	Acidimicrobiia	Acidimicrobiales
FingerMtnordMG_2_bin.63	FingerMtnordMG_2_bin.63.fa	TRUE	FingerMtnordMG_2_bin.63	97.19	1.49	6650952	67790	d__Bacteria;p__Chloroflexota;c__UBA6077;o__;f__;g__;s__	Bacteria;Chloroflexota;UBA6077;;;;	Bacteria	Chloroflexota	UBA6077
FingerMtnordMG_2_bin.65	FingerMtnordMG_2_bin.65.fa	TRUE	FingerMtnordMG_2_bin.65	96.12	3.01	5749004	22367	d__Bacteria;p__Planctomycetota;c__Planctomycetes;o__Isosphaerales;f__Isosphaeraceae;g__;s__	Bacteria;Planctomycetota;Planctomycetes;Isosphaerales;Isosphaeraceae;;	Bacteria	Planctomycetota	Planctomycetes	Isosphaerales	Isosphaeraceae
FingerMtnordMG_2_bin.66	FingerMtnordMG_2_bin.66.fa	TRUE	FingerMtnordMG_2_bin.66	97.29	2.33	6426106	42572	d__Bacteria;p__Planctomycetota;c__Planctomycetes;o__Isosphaerales;f__Isosphaeraceae;g__;s__	Bacteria;Planctomycetota;Planctomycetes;Isosphaerales;Isosphaeraceae;;	Bacteria	Planctomycetota	Planctomycetes	Isosphaerales	Isosphaeraceae
FingerMtnordMG_2_bin.70	FingerMtnordMG_2_bin.70.fa	TRUE	FingerMtnordMG_2_bin.70	99	0	4742293	65188	d__Bacteria;p__Proteobacteria;c__Alphaproteobacteria;o__Acetobacterales;f__Acetobacteraceae;g__Acidisphaera;s__	Bacteria;Proteobacteria;Alphaproteobacteria;Acetobacterales;Acetobacteraceae;Acidisphaera;	Bacteria	Proteobacteria	Alphaproteobacteria	Acetobacterales	Acetobacteraceae	Acidisphaera
FingerMtnordMG_2_bin.77	FingerMtnordMG_2_bin.77.fa	FALSE	FingerMtsudMG_2_bin.49	80.36	3.65	2829738	23430	d__Bacteria;p__Proteobacteria;c__Alphaproteobacteria;o__Acetobacterales;f__Acetobacteraceae;g__;s__	Bacteria;Proteobacteria;Alphaproteobacteria;Acetobacterales;Acetobacteraceae;;	Bacteria	Proteobacteria	Alphaproteobacteria	Acetobacterales	Acetobacteraceae
FingerMtnordMG_2_bin.82	FingerMtnordMG_2_bin.82.fa	FALSE	RicNunsandstonMG_3_bin.85	95.21	5.94	5274128	73827	d__Bacteria;p__Chloroflexota;c__Ktedonobacteria;o__Ktedonobacterales;f__Ktedonobacteraceae;g__UBA7999;s__	Bacteria;Chloroflexota;Ktedonobacteria;Ktedonobacterales;Ktedonobacteraceae;UBA7999;	Bacteria	Chloroflexota	Ktedonobacteria	Ktedonobacterales	Ktedonobacteraceae	UBA7999
FingerMtnordMG_2_bin.85	FingerMtnordMG_2_bin.85.fa	TRUE	FingerMtnordMG_2_bin.85	92.64	6.5	7081701	41462	d__Bacteria;p__Planctomycetota;c__Planctomycetes;o__Isosphaerales;f__Isosphaeraceae;g__;s__	Bacteria;Planctomycetota;Planctomycetes;Isosphaerales;Isosphaeraceae;;	Bacteria	Planctomycetota	Planctomycetes	Isosphaerales	Isosphaeraceae
FingerMtnordMG_2_bin.86	FingerMtnordMG_2_bin.86.fa	TRUE	FingerMtnordMG_2_bin.86	93.4	5.64	6494257	15285	d__Bacteria;p__Chloroflexota;c__UBA6077;o__;f__;g__;s__	Bacteria;Chloroflexota;UBA6077;;;;	Bacteria	Chloroflexota	UBA6077
FingerMtnordMG_2_bin.89	FingerMtnordMG_2_bin.89.fa	TRUE	FingerMtnordMG_2_bin.89	93.09	0.19	3079540	14198	d__Bacteria;p__Dormibacterota;c__Dormibacteria;o__Dormibacterales;f__Dormibacteraceae;g__;s__	Bacteria;Dormibacterota;Dormibacteria;Dormibacterales;Dormibacteraceae;;	Bacteria	Dormibacterota	Dormibacteria	Dormibacterales	Dormibacteraceae
FingerMtnordMG_2_bin.9	FingerMtnordMG_2_bin.9.fa	TRUE	FingerMtnordMG_2_bin.9	81.52	1.74	6517811	41564	d__Bacteria;p__Planctomycetota;c__Planctomycetes;o__Isosphaerales;f__Isosphaeraceae;g__;s__	Bacteria;Planctomycetota;Planctomycetes;Isosphaerales;Isosphaeraceae;;	Bacteria	Planctomycetota	Planctomycetes	Isosphaerales	Isosphaeraceae
FingerMtnordMG_2_bin.94	FingerMtnordMG_2_bin.94.fa	TRUE	FingerMtnordMG_2_bin.94	76.41	7.69	3383826	6351	d__Bacteria;p__Actinobacteriota;c__Thermoleophilia;o__Solirubrobacterales;f__Solirubrobacteraceae;g__Conexibacter;s__	Bacteria;Actinobacteriota;Thermoleophilia;Solirubrobacterales;Solirubrobacteraceae;Conexibacter;	Bacteria	Actinobacteriota	Thermoleophilia	Solirubrobacterales	Solirubrobacteraceae	Conexibacter
FingerMtnordMG_2_bin.96	FingerMtnordMG_2_bin.96.fa	TRUE	FingerMtnordMG_2_bin.96	85.46	0.85	2843255	13936	d__Bacteria;p__Actinobacteriota;c__Thermoleophilia;o__Solirubrobacterales;f__Solirubrobacteraceae;g__;s__	Bacteria;Actinobacteriota;Thermoleophilia;Solirubrobacterales;Solirubrobacteraceae;;	Bacteria	Actinobacteriota	Thermoleophilia	Solirubrobacterales	Solirubrobacteraceae
FingerMtnordMG_2_bin.98	FingerMtnordMG_2_bin.98.fa	TRUE	FingerMtnordMG_2_bin.98	84.56	2.61	2652592	7804	d__Bacteria;p__Proteobacteria;c__Alphaproteobacteria;o__Caulobacterales;f__Caulobacteraceae;g__PMMR1;s__	Bacteria;Proteobacteria;Alphaproteobacteria;Caulobacterales;Caulobacteraceae;PMMR1;	Bacteria	Proteobacteria	Alphaproteobacteria	Caulobacterales	Caulobacteraceae	PMMR1
FingerMtnordMG_2_bin.99	FingerMtnordMG_2_bin.99.fa	TRUE	FingerMtnordMG_2_bin.99	99.69	0.94	5025269	50424	d__Bacteria;p__Chloroflexota;c__Chloroflexia;o__;f__;g__;s__	Bacteria;Chloroflexota;Chloroflexia;;;;	Bacteria	Chloroflexota	Chloroflexia
FingerMtsudMG_2_bin.14	FingerMtsudMG_2_bin.14.fa	FALSE	MtNewZealnordMG_2_bin.9	80.25	2.56	1706315	5965	d__Bacteria;p__Actinobacteriota;c__Acidimicrobiia;o__Acidimicrobiales;f__UBA7543;g__;s__	Bacteria;Actinobacteriota;Acidimicrobiia;Acidimicrobiales;UBA7543;;	Bacteria	Actinobacteriota	Acidimicrobiia	Acidimicrobiales	UBA7543
FingerMtsudMG_2_bin.2	FingerMtsudMG_2_bin.2.fa	TRUE	FingerMtsudMG_2_bin.2	96.29	4.81	7550681	23204	d__Bacteria;p__Proteobacteria;c__Alphaproteobacteria;o__Rhizobiales;f__Beijerinckiaceae;g__;s__	Bacteria;Proteobacteria;Alphaproteobacteria;Rhizobiales;Beijerinckiaceae;;	Bacteria	Proteobacteria	Alphaproteobacteria	Rhizobiales	Beijerinckiaceae
FingerMtsudMG_2_bin.24	FingerMtsudMG_2_bin.24.fa	TRUE	FingerMtsudMG_2_bin.24	90.83	0.53	3276360	54702	d__Bacteria;p__Actinobacteriota;c__Actinobacteria;o__Frankiales;f__Frankiaceae;g__;s__	Bacteria;Actinobacteriota;Actinobacteria;Frankiales;Frankiaceae;;	Bacteria	Actinobacteriota	Actinobacteria	Frankiales	Frankiaceae
FingerMtsudMG_2_bin.25	FingerMtsudMG_2_bin.25.fa	TRUE	FingerMtsudMG_2_bin.25	90.6	0	3009859	25333	d__Bacteria;p__Acidobacteriota;c__Acidobacteriae;o__Acidobacteriales;f__Acidobacteriaceae;g__Granulicella;s__	Bacteria;Acidobacteriota;Acidobacteriae;Acidobacteriales;Acidobacteriaceae;Granulicella;	Bacteria	Acidobacteriota	Acidobacteriae	Acidobacteriales	Acidobacteriaceae	Granulicella
FingerMtsudMG_2_bin.26	FingerMtsudMG_2_bin.26.fa	FALSE	UniValsudMG_2_bin.19	97.22	0.93	3361442	50952	d__Bacteria;p__UBP12;c__UBA5184;o__UBA5184;f__UBA5184;g__;s__	Bacteria;UBP12;UBA5184;UBA5184;UBA5184;;	Bacteria	UBP12	UBA5184	UBA5184	UBA5184
FingerMtsudMG_2_bin.27	FingerMtsudMG_2_bin.27.fa	FALSE	MtNewZealnordMG_2_bin.19	97.84	1.85	3681726	39438	d__Bacteria;p__UBP12;c__UBA5184;o__UBA5184;f__UBA5184;g__;s__	Bacteria;UBP12;UBA5184;UBA5184;UBA5184;;	Bacteria	UBP12	UBA5184	UBA5184	UBA5184
FingerMtsudMG_2_bin.3	FingerMtsudMG_2_bin.3.fa	TRUE	FingerMtsudMG_2_bin.3	96.55	0	4931783	194431	d__Bacteria;p__Acidobacteriota;c__Acidobacteriae;o__Acidobacteriales;f__Acidobacteriaceae;g__;s__	Bacteria;Acidobacteriota;Acidobacteriae;Acidobacteriales;Acidobacteriaceae;;	Bacteria	Acidobacteriota	Acidobacteriae	Acidobacteriales	Acidobacteriaceae
FingerMtsudMG_2_bin.32	FingerMtsudMG_2_bin.32.fa	FALSE	UniValnordMG_2_bin.36	74.28	1.52	2904907	8875	d__Bacteria;p__Actinobacteriota;c__Actinobacteria;o__Jiangellales;f__;g__;s__	Bacteria;Actinobacteriota;Actinobacteria;Jiangellales;;;	Bacteria	Actinobacteriota	Actinobacteria	Jiangellales
FingerMtsudMG_2_bin.36	FingerMtsudMG_2_bin.36.fa	FALSE	SiePeanordMG_2_bin.44	83.43	7.25	5880933	16400	d__Bacteria;p__Actinobacteriota;c__Actinobacteria;o__Frankiales;f__Frankiaceae;g__;s__	Bacteria;Actinobacteriota;Actinobacteria;Frankiales;Frankiaceae;;	Bacteria	Actinobacteriota	Actinobacteria	Frankiales	Frankiaceae
FingerMtsudMG_2_bin.46	FingerMtsudMG_2_bin.46.fa	FALSE	LinTernordMG_2_bin.22	75.72	4.32	2593850	8834	d__Bacteria;p__Actinobacteriota;c__Actinobacteria;o__Frankiales;f__Frankiaceae;g__;s__	Bacteria;Actinobacteriota;Actinobacteria;Frankiales;Frankiaceae;;	Bacteria	Actinobacteriota	Actinobacteria	Frankiales	Frankiaceae
FingerMtsudMG_2_bin.49	FingerMtsudMG_2_bin.49.fa	TRUE	FingerMtsudMG_2_bin.49	97.01	1	4243580	25974	d__Bacteria;p__Proteobacteria;c__Alphaproteobacteria;o__Acetobacterales;f__Acetobacteraceae;g__70-18;s__	Bacteria;Proteobacteria;Alphaproteobacteria;Acetobacterales;Acetobacteraceae;70-18;	Bacteria	Proteobacteria	Alphaproteobacteria	Acetobacterales	Acetobacteraceae	70-18
FingerMtsudMG_2_bin.5	FingerMtsudMG_2_bin.5.fa	TRUE	FingerMtsudMG_2_bin.5	76.8	1.85	3090209	12426	d__Bacteria;p__Armatimonadota;c__Chthonomonadetes;o__;f__;g__;s__	Bacteria;Armatimonadota;Chthonomonadetes;;;;	Bacteria	Armatimonadota	Chthonomonadetes
FingerMtsudMG_2_bin.50	FingerMtsudMG_2_bin.50.fa	TRUE	FingerMtsudMG_2_bin.50	89.2	3.09	2726072	10307	d__Bacteria;p__UBP12;c__UBA5184;o__UBA5184;f__UBA5184;g__;s__	Bacteria;UBP12;UBA5184;UBA5184;UBA5184;;	Bacteria	UBP12	UBA5184	UBA5184	UBA5184
FingerMtsudMG_2_bin.54	FingerMtsudMG_2_bin.54.fa	FALSE	PudButsudMG_2_bin.62	96.33	0.92	4774918	12779	d__Bacteria;p__Actinobacteriota;c__Actinobacteria;o__Corynebacteriales;f__Nakamurellaceae;g__Nakamurella;s__	Bacteria;Actinobacteriota;Actinobacteria;Corynebacteriales;Nakamurellaceae;Nakamurella;	Bacteria	Actinobacteriota	Actinobacteria	Corynebacteriales	Nakamurellaceae	Nakamurella
FingerMtsudMG_2_bin.55	FingerMtsudMG_2_bin.55.fa	FALSE	FingerMtnordMG_2_bin.19	90.33	0.85	3358921	276966	d__Bacteria;p__Acidobacteriota;c__Acidobacteriae;o__Acidobacteriales;f__Acidobacteriaceae;g__;s__	Bacteria;Acidobacteriota;Acidobacteriae;Acidobacteriales;Acidobacteriaceae;;	Bacteria	Acidobacteriota	Acidobacteriae	Acidobacteriales	Acidobacteriaceae
FingerMtsudMG_2_bin.62	FingerMtsudMG_2_bin.62.fa	FALSE	SiePeanordMG_2_bin.60	76.3	8.09	7049571	6376	d__Bacteria;p__Actinobacteriota;c__Actinobacteria;o__Frankiales;f__Frankiaceae;g__;s__	Bacteria;Actinobacteriota;Actinobacteria;Frankiales;Frankiaceae;;	Bacteria	Actinobacteriota	Actinobacteria	Frankiales	Frankiaceae
FingerMtsudMG_2_bin.66	FingerMtsudMG_2_bin.66.fa	TRUE	FingerMtsudMG_2_bin.66	56.67	1.85	2721847	6657	d__Bacteria;p__Armatimonadota;c__Chthonomonadetes;o__;f__;g__;s__	Bacteria;Armatimonadota;Chthonomonadetes;;;;	Bacteria	Armatimonadota	Chthonomonadetes
FingerMtsudMG_2_bin.74	FingerMtsudMG_2_bin.74.fa	TRUE	FingerMtsudMG_2_bin.74	73.07	1.33	3454576	5636	d__Bacteria;p__Actinobacteriota;c__Actinobacteria;o__Corynebacteriales;f__Nakamurellaceae;g__Nakamurella;s__	Bacteria;Actinobacteriota;Actinobacteria;Corynebacteriales;Nakamurellaceae;Nakamurella;	Bacteria	Actinobacteriota	Actinobacteria	Corynebacteriales	Nakamurellaceae	Nakamurella
FingerMtsudMG_2_bin.76	FingerMtsudMG_2_bin.76.fa	FALSE	MtNewZealnordMG_2_bin.7	59.08	1.98	2445912	6311	d__Bacteria;p__Chloroflexota;c__UBA5177;o__UBA5177;f__UBA5177;g__;s__	Bacteria;Chloroflexota;UBA5177;UBA5177;UBA5177;;	Bacteria	Chloroflexota	UBA5177	UBA5177	UBA5177
FingerMtsudMG_2_bin.81	FingerMtsudMG_2_bin.81.fa	FALSE	RicNunsandstonMG_3_bin.85	93.23	5.94	5866838	99720	d__Bacteria;p__Chloroflexota;c__Ktedonobacteria;o__Ktedonobacterales;f__Ktedonobacteraceae;g__UBA7999;s__	Bacteria;Chloroflexota;Ktedonobacteria;Ktedonobacterales;Ktedonobacteraceae;UBA7999;	Bacteria	Chloroflexota	Ktedonobacteria	Ktedonobacterales	Ktedonobacteraceae	UBA7999
FingerMtsudMG_2_bin.85	FingerMtsudMG_2_bin.85.fa	FALSE	RicNunsandstonMG_3_bin.88	91.36	0.93	5356124	44246	d__Bacteria;p__Armatimonadota;c__Chthonomonadetes;o__;f__;g__;s__	Bacteria;Armatimonadota;Chthonomonadetes;;;;	Bacteria	Armatimonadota	Chthonomonadetes
FingerMtsudMG_2_bin.86	FingerMtsudMG_2_bin.86.fa	FALSE	UniValsudMG_2_bin.107	89.75	1.85	2654181	18724	d__Bacteria;p__UBP12;c__UBA5184;o__UBA5184;f__UBA5184;g__;s__	Bacteria;UBP12;UBA5184;UBA5184;UBA5184;;	Bacteria	UBP12	UBA5184	UBA5184	UBA5184
FingerMtsudMG_2_bin.9	FingerMtsudMG_2_bin.9.fa	TRUE	FingerMtsudMG_2_bin.9	85.11	7.7	8468528	13806	d__Bacteria;p__Chloroflexota;c__UBA5177;o__;f__;g__;s__	Bacteria;Chloroflexota;UBA5177;;;;	Bacteria	Chloroflexota	UBA5177
FingerMtsudMG_2_bin.91	FingerMtsudMG_2_bin.91.fa	FALSE	MtNewZealnordMG_2_bin.16	89.35	1.85	3695985	12238	d__Bacteria;p__Armatimonadota;c__Chthonomonadetes;o__;f__;g__;s__	Bacteria;Armatimonadota;Chthonomonadetes;;;;	Bacteria	Armatimonadota	Chthonomonadetes
FingerMtsudMG_2_bin.92	FingerMtsudMG_2_bin.92.fa	FALSE	RicNunsandstonMG_4_bin.33	87.88	0.94	3899563	8587	d__Bacteria;p__Chloroflexota;c__Chloroflexia;o__;f__;g__;s__	Bacteria;Chloroflexota;Chloroflexia;;;;	Bacteria	Chloroflexota	Chloroflexia
KnobheadnordMG_2_bin.10	KnobheadnordMG_2_bin.10.fa	FALSE	RickerHillsnord_2_bin.48	92.78	1	3632444	41434	d__Bacteria;p__Proteobacteria;c__Alphaproteobacteria;o__Acetobacterales;f__Acetobacteraceae;g__;s__	Bacteria;Proteobacteria;Alphaproteobacteria;Acetobacterales;Acetobacteraceae;;	Bacteria	Proteobacteria	Alphaproteobacteria	Acetobacterales	Acetobacteraceae
KnobheadnordMG_2_bin.11	KnobheadnordMG_2_bin.11.fa	FALSE	UniValnordMG_2_bin.45	86.19	2.34	2743596	8895	d__Bacteria;p__Actinobacteriota;c__Actinobacteria;o__Actinomycetales;f__Dermatophilaceae;g__GCA-2748155;s__	Bacteria;Actinobacteriota;Actinobacteria;Actinomycetales;Dermatophilaceae;GCA-2748155;	Bacteria	Actinobacteriota	Actinobacteria	Actinomycetales	Dermatophilaceae	GCA-2748155
KnobheadnordMG_2_bin.18	KnobheadnordMG_2_bin.18.fa	FALSE	MtNewZealnordMG_2_bin.74	96.71	2.33	6199637	21270	d__Bacteria;p__Planctomycetota;c__Planctomycetes;o__Isosphaerales;f__Isosphaeraceae;g__;s__	Bacteria;Planctomycetota;Planctomycetes;Isosphaerales;Isosphaeraceae;;	Bacteria	Planctomycetota	Planctomycetes	Isosphaerales	Isosphaeraceae
KnobheadnordMG_2_bin.20	KnobheadnordMG_2_bin.20.fa	FALSE	RicNunsandstonMG_4_bin.94	96.54	2.36	7361965	11942	d__Bacteria;p__Chloroflexota;c__Chloroflexia;o__;f__;g__;s__	Bacteria;Chloroflexota;Chloroflexia;;;;	Bacteria	Chloroflexota	Chloroflexia
KnobheadnordMG_2_bin.22	KnobheadnordMG_2_bin.22.fa	FALSE	FingerMtsudMG_2_bin.49	96.52	2.11	4096290	36248	d__Bacteria;p__Proteobacteria;c__Alphaproteobacteria;o__Acetobacterales;f__Acetobacteraceae;g__70-18;s__	Bacteria;Proteobacteria;Alphaproteobacteria;Acetobacterales;Acetobacteraceae;70-18;	Bacteria	Proteobacteria	Alphaproteobacteria	Acetobacterales	Acetobacteraceae	70-18
KnobheadnordMG_2_bin.23	KnobheadnordMG_2_bin.23.fa	TRUE	KnobheadnordMG_2_bin.23	98.67	2.91	4353957	35293	d__Bacteria;p__Actinobacteriota;c__Actinobacteria;o__Corynebacteriales;f__Corynebacteriaceae;g__;s__	Bacteria;Actinobacteriota;Actinobacteria;Corynebacteriales;Corynebacteriaceae;;	Bacteria	Actinobacteriota	Actinobacteria	Corynebacteriales	Corynebacteriaceae
KnobheadnordMG_2_bin.33	KnobheadnordMG_2_bin.33.fa	FALSE	UniValnordMG_2_bin.36	75.05	1.76	2264968	5417	d__Bacteria;p__Actinobacteriota;c__Actinobacteria;o__Jiangellales;f__Jiangellaceae;g__;s__	Bacteria;Actinobacteriota;Actinobacteria;Jiangellales;Jiangellaceae;;	Bacteria	Actinobacteriota	Actinobacteria	Jiangellales	Jiangellaceae
KnobheadnordMG_2_bin.34	KnobheadnordMG_2_bin.34.fa	TRUE	KnobheadnordMG_2_bin.34	94.44	1.3	4009868	38330	d__Bacteria;p__Armatimonadota;c__Chthonomonadetes;o__;f__;g__;s__	Bacteria;Armatimonadota;Chthonomonadetes;;;;	Bacteria	Armatimonadota	Chthonomonadetes
KnobheadnordMG_2_bin.35	KnobheadnordMG_2_bin.35.fa	FALSE	UniValsudMG_2_bin.107	97.84	1.16	3134126	83045	d__Bacteria;p__UBP12;c__UBA5184;o__UBA5184;f__UBA5184;g__;s__	Bacteria;UBP12;UBA5184;UBA5184;UBA5184;;	Bacteria	UBP12	UBA5184	UBA5184	UBA5184
KnobheadnordMG_2_bin.48	KnobheadnordMG_2_bin.48.fa	FALSE	ButProsudMG_2_bin.21	69.51	3.4	3746708	10605	d__Bacteria;p__Actinobacteriota;c__Actinobacteria;o__Corynebacteriales;f__Corynebacteriaceae;g__;s__	Bacteria;Actinobacteriota;Actinobacteria;Corynebacteriales;Corynebacteriaceae;;	Bacteria	Actinobacteriota	Actinobacteria	Corynebacteriales	Corynebacteriaceae
KnobheadnordMG_2_bin.56	KnobheadnordMG_2_bin.56.fa	FALSE	PudButsudMG_2_bin.15	89.13	0.85	3592326	143963	d__Bacteria;p__Acidobacteriota;c__Acidobacteriae;o__Acidobacteriales;f__Acidobacteriaceae;g__;s__	Bacteria;Acidobacteriota;Acidobacteriae;Acidobacteriales;Acidobacteriaceae;;	Bacteria	Acidobacteriota	Acidobacteriae	Acidobacteriales	Acidobacteriaceae
KnobheadnordMG_2_bin.7	KnobheadnordMG_2_bin.7.fa	FALSE	TrioNunataknord_2_bin.29	95.87	5.95	4437733	22084	d__Bacteria;p__Actinobacteriota;c__Actinobacteria;o__Corynebacteriales;f__Corynebacteriaceae;g__;s__	Bacteria;Actinobacteriota;Actinobacteria;Corynebacteriales;Corynebacteriaceae;;	Bacteria	Actinobacteriota	Actinobacteria	Corynebacteriales	Corynebacteriaceae
KnobheadnordMG_2_bin.72	KnobheadnordMG_2_bin.72.fa	TRUE	KnobheadnordMG_2_bin.72	94.03	0.75	3423286	70594	d__Bacteria;p__Proteobacteria;c__Alphaproteobacteria;o__Acetobacterales;f__Acetobacteraceae;g__70-18;s__	Bacteria;Proteobacteria;Alphaproteobacteria;Acetobacterales;Acetobacteraceae;70-18;	Bacteria	Proteobacteria	Alphaproteobacteria	Acetobacterales	Acetobacteraceae	70-18
KnobheadsudMG_2_bin.12	KnobheadsudMG_2_bin.12.fa	FALSE	PudButsudMG_2_bin.46	82.1	0.19	3475458	13277	d__Bacteria;p__Armatimonadota;c__Chthonomonadetes;o__;f__;g__;s__	Bacteria;Armatimonadota;Chthonomonadetes;;;;	Bacteria	Armatimonadota	Chthonomonadetes
KnobheadsudMG_2_bin.2	KnobheadsudMG_2_bin.2.fa	TRUE	KnobheadsudMG_2_bin.2	89.32	2.78	3684617	17966	d__Bacteria;p__Actinobacteriota;c__Actinobacteria;o__Actinomycetales;f__Dermatophilaceae;g__GCA-2748155;s__	Bacteria;Actinobacteriota;Actinobacteria;Actinomycetales;Dermatophilaceae;GCA-2748155;	Bacteria	Actinobacteriota	Actinobacteria	Actinomycetales	Dermatophilaceae	GCA-2748155
KnobheadsudMG_2_bin.22	KnobheadsudMG_2_bin.22.fa	FALSE	PudButnordMG_2_bin.85	93.88	1.71	4046589	47909	d__Bacteria;p__Acidobacteriota;c__Acidobacteriae;o__Acidobacteriales;f__Acidobacteriaceae;g__;s__	Bacteria;Acidobacteriota;Acidobacteriae;Acidobacteriales;Acidobacteriaceae;;	Bacteria	Acidobacteriota	Acidobacteriae	Acidobacteriales	Acidobacteriaceae
KnobheadsudMG_2_bin.25	KnobheadsudMG_2_bin.25.fa	FALSE	RickerHillsnord_2_bin.25	71.05	3.02	3752593	5450	d__Bacteria;p__Chloroflexota;c__Chloroflexia;o__;f__;g__;s__	Bacteria;Chloroflexota;Chloroflexia;;;;	Bacteria	Chloroflexota	Chloroflexia
KnobheadsudMG_2_bin.3	KnobheadsudMG_2_bin.3.fa	FALSE	PudButsudMG_2_bin.78	99.55	3.6	4165139	67097	d__Bacteria;p__Actinobacteriota;c__Actinobacteria;o__Jiangellales;f__;g__;s__	Bacteria;Actinobacteriota;Actinobacteria;Jiangellales;;;	Bacteria	Actinobacteriota	Actinobacteria	Jiangellales
KnobheadsudMG_2_bin.30	KnobheadsudMG_2_bin.30.fa	FALSE	PudButsudMG_2_bin.62	98.25	1.68	5364474	63401	d__Bacteria;p__Actinobacteriota;c__Actinobacteria;o__Corynebacteriales;f__Nakamurellaceae;g__Nakamurella;s__	Bacteria;Actinobacteriota;Actinobacteria;Corynebacteriales;Nakamurellaceae;Nakamurella;	Bacteria	Actinobacteriota	Actinobacteria	Corynebacteriales	Nakamurellaceae	Nakamurella
KnobheadsudMG_2_bin.4	KnobheadsudMG_2_bin.4.fa	TRUE	KnobheadsudMG_2_bin.4	97.84	0.93	3047759	103498	d__Bacteria;p__UBP12;c__UBA5184;o__UBA5184;f__UBA5184;g__;s__	Bacteria;UBP12;UBA5184;UBA5184;UBA5184;;	Bacteria	UBP12	UBA5184	UBA5184	UBA5184
KnobheadsudMG_2_bin.40	KnobheadsudMG_2_bin.40.fa	FALSE	PudButnordMG_2_bin.3	53.13	0.6	2500974	4136	d__Bacteria;p__Proteobacteria;c__Alphaproteobacteria;o__Acetobacterales;f__Acetobacteraceae;g__70-18;s__	Bacteria;Proteobacteria;Alphaproteobacteria;Acetobacterales;Acetobacteraceae;70-18;	Bacteria	Proteobacteria	Alphaproteobacteria	Acetobacterales	Acetobacteraceae	70-18
KnobheadsudMG_2_bin.48	KnobheadsudMG_2_bin.48.fa	TRUE	KnobheadsudMG_2_bin.48	93.52	1.01	4165032	18911	d__Bacteria;p__Armatimonadota;c__Chthonomonadetes;o__;f__;g__;s__	Bacteria;Armatimonadota;Chthonomonadetes;;;;	Bacteria	Armatimonadota	Chthonomonadetes
KnobheadsudMG_2_bin.64	KnobheadsudMG_2_bin.64.fa	FALSE	PudButnordMG_2_bin.36	77.75	0.79	4249181	8286	d__Bacteria;p__Bacteroidota;c__Bacteroidia;o__Cytophagales;f__Hymenobacteraceae;g__Hymenobacter;s__	Bacteria;Bacteroidota;Bacteroidia;Cytophagales;Hymenobacteraceae;Hymenobacter;	Bacteria	Bacteroidota	Bacteroidia	Cytophagales	Hymenobacteraceae	Hymenobacter
KnobheadsudMG_2_bin.67	KnobheadsudMG_2_bin.67.fa	FALSE	PudButsudMG_2_bin.57	65.71	1.74	2356107	5581	d__Bacteria;p__Proteobacteria;c__Alphaproteobacteria;o__Acetobacterales;f__Acetobacteraceae;g__;s__	Bacteria;Proteobacteria;Alphaproteobacteria;Acetobacterales;Acetobacteraceae;;	Bacteria	Proteobacteria	Alphaproteobacteria	Acetobacterales	Acetobacteraceae
KnobheadsudMG_2_bin.76	KnobheadsudMG_2_bin.76.fa	FALSE	PudButsudMG_2_bin.38	94.05	2.48	4535936	20984	d__Bacteria;p__Chloroflexota;c__UBA5177;o__UBA5177;f__UBA5177;g__;s__	Bacteria;Chloroflexota;UBA5177;UBA5177;UBA5177;;	Bacteria	Chloroflexota	UBA5177	UBA5177	UBA5177
KnobheadsudMG_2_bin.80	KnobheadsudMG_2_bin.80.fa	TRUE	KnobheadsudMG_2_bin.80	52.38	0.16	6419621	10377	d__Bacteria;p__Chloroflexota;c__UBA5177;o__;f__;g__;s__	Bacteria;Chloroflexota;UBA5177;;;;	Bacteria	Chloroflexota	UBA5177
LinTernordMG_2_bin.19	LinTernordMG_2_bin.19.fa	FALSE	FingerMtsudMG_2_bin.49	83.28	2.45	3562414	7083	d__Bacteria;p__Proteobacteria;c__Alphaproteobacteria;o__Acetobacterales;f__Acetobacteraceae;g__;s__	Bacteria;Proteobacteria;Alphaproteobacteria;Acetobacterales;Acetobacteraceae;;	Bacteria	Proteobacteria	Alphaproteobacteria	Acetobacterales	Acetobacteraceae
LinTernordMG_2_bin.2	LinTernordMG_2_bin.2.fa	TRUE	LinTernordMG_2_bin.2	98.53	0.59	4520567	83280	d__Bacteria;p__Actinobacteriota;c__Actinobacteria;o__Frankiales;f__Frankiaceae;g__;s__	Bacteria;Actinobacteriota;Actinobacteria;Frankiales;Frankiaceae;;	Bacteria	Actinobacteriota	Actinobacteria	Frankiales	Frankiaceae
LinTernordMG_2_bin.21	LinTernordMG_2_bin.21.fa	TRUE	LinTernordMG_2_bin.21	95.23	2.99	8490106	15822	d__Bacteria;p__Proteobacteria;c__Alphaproteobacteria;o__Acetobacterales;f__Acetobacteraceae;g__70-18;s__	Bacteria;Proteobacteria;Alphaproteobacteria;Acetobacterales;Acetobacteraceae;70-18;	Bacteria	Proteobacteria	Alphaproteobacteria	Acetobacterales	Acetobacteraceae	70-18
LinTernordMG_2_bin.22	LinTernordMG_2_bin.22.fa	TRUE	LinTernordMG_2_bin.22	98.84	1.08	4401328	93592	d__Bacteria;p__Actinobacteriota;c__Actinobacteria;o__Frankiales;f__Frankiaceae;g__;s__	Bacteria;Actinobacteriota;Actinobacteria;Frankiales;Frankiaceae;;	Bacteria	Actinobacteriota	Actinobacteria	Frankiales	Frankiaceae
LinTernordMG_2_bin.25	LinTernordMG_2_bin.25.fa	FALSE	UniValsudMG_2_bin.26	97.14	0.95	4425687	89038	d__Bacteria;p__Bacteroidota;c__Bacteroidia;o__Sphingobacteriales;f__Sphingobacteriaceae;g__;s__	Bacteria;Bacteroidota;Bacteroidia;Sphingobacteriales;Sphingobacteriaceae;;	Bacteria	Bacteroidota	Bacteroidia	Sphingobacteriales	Sphingobacteriaceae
LinTernordMG_2_bin.27	LinTernordMG_2_bin.27.fa	FALSE	RicNunsandstonMG_4_bin.94	99.37	2.83	7579982	23305	d__Bacteria;p__Chloroflexota;c__Chloroflexia;o__;f__;g__;s__	Bacteria;Chloroflexota;Chloroflexia;;;;	Bacteria	Chloroflexota	Chloroflexia
LinTernordMG_2_bin.33	LinTernordMG_2_bin.33.fa	FALSE	MtNewZealnordMG_2_bin.74	94.09	2.75	6184926	18078	d__Bacteria;p__Planctomycetota;c__Planctomycetes;o__Isosphaerales;f__Isosphaeraceae;g__;s__	Bacteria;Planctomycetota;Planctomycetes;Isosphaerales;Isosphaeraceae;;	Bacteria	Planctomycetota	Planctomycetes	Isosphaerales	Isosphaeraceae
LinTernordMG_2_bin.4	LinTernordMG_2_bin.4.fa	TRUE	LinTernordMG_2_bin.4	96.17	1.01	4186231	23145	d__Bacteria;p__Actinobacteriota;c__Actinobacteria;o__Corynebacteriales;f__Nakamurellaceae;g__Nakamurella_A;s__	Bacteria;Actinobacteriota;Actinobacteria;Corynebacteriales;Nakamurellaceae;Nakamurella_A;	Bacteria	Actinobacteriota	Actinobacteria	Corynebacteriales	Nakamurellaceae	Nakamurella_A
LinTernordMG_2_bin.44	LinTernordMG_2_bin.44.fa	TRUE	LinTernordMG_2_bin.44	92.26	0.87	3948692	82047	d__Bacteria;p__Actinobacteriota;c__Actinobacteria;o__Corynebacteriales;f__Pseudonocardiaceae;g__Actinomycetospora;s__	Bacteria;Actinobacteriota;Actinobacteria;Corynebacteriales;Pseudonocardiaceae;Actinomycetospora;	Bacteria	Actinobacteriota	Actinobacteria	Corynebacteriales	Pseudonocardiaceae	Actinomycetospora
LinTernordMG_2_bin.53	LinTernordMG_2_bin.53.fa	FALSE	UniValnordMG_2_bin.36	89.05	2.34	3041561	11802	d__Bacteria;p__Actinobacteriota;c__Actinobacteria;o__Jiangellales;f__;g__;s__	Bacteria;Actinobacteriota;Actinobacteria;Jiangellales;;;	Bacteria	Actinobacteriota	Actinobacteria	Jiangellales
LinTernordMG_2_bin.56	LinTernordMG_2_bin.56.fa	FALSE	MtNewZealnordMG_2_bin.16	95.37	0.93	4120592	77001	d__Bacteria;p__Armatimonadota;c__Chthonomonadetes;o__;f__;g__;s__	Bacteria;Armatimonadota;Chthonomonadetes;;;;	Bacteria	Armatimonadota	Chthonomonadetes
LinTernordMG_2_bin.58	LinTernordMG_2_bin.58.fa	FALSE	UniValnordMG_2_bin.58	75.38	0.69	3242871	6721	d__Bacteria;p__Proteobacteria;c__Alphaproteobacteria;o__Rhizobiales;f__Beijerinckiaceae;g__;s__	Bacteria;Proteobacteria;Alphaproteobacteria;Rhizobiales;Beijerinckiaceae;;	Bacteria	Proteobacteria	Alphaproteobacteria	Rhizobiales	Beijerinckiaceae
LinTernordMG_2_bin.65	LinTernordMG_2_bin.65.fa	FALSE	PudButsudMG_2_bin.62	71.72	0.59	2600305	7069	d__Bacteria;p__Actinobacteriota;c__Actinobacteria;o__Corynebacteriales;f__Nakamurellaceae;g__Nakamurella;s__	Bacteria;Actinobacteriota;Actinobacteria;Corynebacteriales;Nakamurellaceae;Nakamurella;	Bacteria	Actinobacteriota	Actinobacteria	Corynebacteriales	Nakamurellaceae	Nakamurella
LinTernordMG_2_bin.8	LinTernordMG_2_bin.8.fa	TRUE	LinTernordMG_2_bin.8	95.59	0.41	4640496	19069	d__Bacteria;p__Actinobacteriota;c__Actinobacteria;o__Actinomycetales;f__Dermatophilaceae;g__GCA-2748155;s__	Bacteria;Actinobacteriota;Actinobacteria;Actinomycetales;Dermatophilaceae;GCA-2748155;	Bacteria	Actinobacteriota	Actinobacteria	Actinomycetales	Dermatophilaceae	GCA-2748155
MtNewZealnordMG_2_bin.1	MtNewZealnordMG_2_bin.1.fa	TRUE	MtNewZealnordMG_2_bin.1	97.01	0.85	3189028	51237	d__Bacteria;p__Actinobacteriota;c__Thermoleophilia;o__Solirubrobacterales;f__Solirubrobacteraceae;g__;s__	Bacteria;Actinobacteriota;Thermoleophilia;Solirubrobacterales;Solirubrobacteraceae;;	Bacteria	Actinobacteriota	Thermoleophilia	Solirubrobacterales	Solirubrobacteraceae
MtNewZealnordMG_2_bin.10	MtNewZealnordMG_2_bin.10.fa	TRUE	MtNewZealnordMG_2_bin.10	97.86	2.99	5460720	49258	d__Bacteria;p__Actinobacteriota;c__Thermoleophilia;o__Solirubrobacterales;f__Solirubrobacteraceae;g__;s__	Bacteria;Actinobacteriota;Thermoleophilia;Solirubrobacterales;Solirubrobacteraceae;;	Bacteria	Actinobacteriota	Thermoleophilia	Solirubrobacterales	Solirubrobacteraceae
MtNewZealnordMG_2_bin.103	MtNewZealnordMG_2_bin.103.fa	FALSE	RicNunsandstonMG_3_bin.85	93.23	5.94	5622945	73216	d__Bacteria;p__Chloroflexota;c__Ktedonobacteria;o__Ktedonobacterales;f__Ktedonobacteraceae;g__UBA7999;s__	Bacteria;Chloroflexota;Ktedonobacteria;Ktedonobacterales;Ktedonobacteraceae;UBA7999;	Bacteria	Chloroflexota	Ktedonobacteria	Ktedonobacterales	Ktedonobacteraceae	UBA7999
MtNewZealnordMG_2_bin.105	MtNewZealnordMG_2_bin.105.fa	TRUE	MtNewZealnordMG_2_bin.105	94.91	0	3468607	67372	d__Bacteria;p__UBP12;c__UBA5184;o__UBA5184;f__UBA5184;g__;s__	Bacteria;UBP12;UBA5184;UBA5184;UBA5184;;	Bacteria	UBP12	UBA5184	UBA5184	UBA5184
MtNewZealnordMG_2_bin.11	MtNewZealnordMG_2_bin.11.fa	FALSE	SiePeanordMG_2_bin.21	81.29	1.28	2749243	6988	d__Bacteria;p__Actinobacteriota;c__Acidimicrobiia;o__Microtrichales;f__UBA9382;g__;s__	Bacteria;Actinobacteriota;Acidimicrobiia;Microtrichales;UBA9382;;	Bacteria	Actinobacteriota	Acidimicrobiia	Microtrichales	UBA9382
MtNewZealnordMG_2_bin.13	MtNewZealnordMG_2_bin.13.fa	FALSE	RicNunsandstonMG_4_bin.87	97.51	0.75	3862057	37558	d__Bacteria;p__Proteobacteria;c__Alphaproteobacteria;o__Acetobacterales;f__Acetobacteraceae;g__70-18;s__	Bacteria;Proteobacteria;Alphaproteobacteria;Acetobacterales;Acetobacteraceae;70-18;	Bacteria	Proteobacteria	Alphaproteobacteria	Acetobacterales	Acetobacteraceae	70-18
MtNewZealnordMG_2_bin.16	MtNewZealnordMG_2_bin.16.fa	TRUE	MtNewZealnordMG_2_bin.16	97.22	0.93	4172824	40055	d__Bacteria;p__Armatimonadota;c__Chthonomonadetes;o__;f__;g__;s__	Bacteria;Armatimonadota;Chthonomonadetes;;;;	Bacteria	Armatimonadota	Chthonomonadetes
MtNewZealnordMG_2_bin.19	MtNewZealnordMG_2_bin.19.fa	TRUE	MtNewZealnordMG_2_bin.19	96.91	0.93	3500797	197358	d__Bacteria;p__UBP12;c__UBA5184;o__UBA5184;f__UBA5184;g__;s__	Bacteria;UBP12;UBA5184;UBA5184;UBA5184;;	Bacteria	UBP12	UBA5184	UBA5184	UBA5184
MtNewZealnordMG_2_bin.2	MtNewZealnordMG_2_bin.2.fa	FALSE	BatPronordMG_2_bin.42	93.73	1.98	4217126	48200	d__Bacteria;p__Chloroflexota;c__UBA5177;o__UBA5177;f__UBA5177;g__;s__	Bacteria;Chloroflexota;UBA5177;UBA5177;UBA5177;;	Bacteria	Chloroflexota	UBA5177	UBA5177	UBA5177
MtNewZealnordMG_2_bin.24	MtNewZealnordMG_2_bin.24.fa	FALSE	RickerHillsnord_2_bin.48	63.79	1.55	2606950	7705	d__Bacteria;p__Proteobacteria;c__Alphaproteobacteria;o__Acetobacterales;f__Acetobacteraceae;g__70-18;s__	Bacteria;Proteobacteria;Alphaproteobacteria;Acetobacterales;Acetobacteraceae;70-18;	Bacteria	Proteobacteria	Alphaproteobacteria	Acetobacterales	Acetobacteraceae	70-18
MtNewZealnordMG_2_bin.25	MtNewZealnordMG_2_bin.25.fa	TRUE	MtNewZealnordMG_2_bin.25	95.52	1.52	4920825	16992	d__Bacteria;p__Proteobacteria;c__Alphaproteobacteria;o__Acetobacterales;f__Acetobacteraceae;g__70-18;s__	Bacteria;Proteobacteria;Alphaproteobacteria;Acetobacterales;Acetobacteraceae;70-18;	Bacteria	Proteobacteria	Alphaproteobacteria	Acetobacterales	Acetobacteraceae	70-18
MtNewZealnordMG_2_bin.27	MtNewZealnordMG_2_bin.27.fa	TRUE	MtNewZealnordMG_2_bin.27	71.56	9.57	5562112	5164	d__Bacteria;p__Actinobacteriota;c__Acidimicrobiia;o__Acidimicrobiales;f__;g__;s__	Bacteria;Actinobacteriota;Acidimicrobiia;Acidimicrobiales;;;	Bacteria	Actinobacteriota	Acidimicrobiia	Acidimicrobiales
MtNewZealnordMG_2_bin.36	MtNewZealnordMG_2_bin.36.fa	FALSE	FingerMtsudMG_2_bin.3	87.93	0	4654335	607357	d__Bacteria;p__Acidobacteriota;c__Acidobacteriae;o__Acidobacteriales;f__Acidobacteriaceae;g__;s__	Bacteria;Acidobacteriota;Acidobacteriae;Acidobacteriales;Acidobacteriaceae;;	Bacteria	Acidobacteriota	Acidobacteriae	Acidobacteriales	Acidobacteriaceae
MtNewZealnordMG_2_bin.39	MtNewZealnordMG_2_bin.39.fa	FALSE	RicNunsandstonMG_4_bin.33	94.17	2.83	4826292	16879	d__Bacteria;p__Chloroflexota;c__Chloroflexia;o__;f__;g__;s__	Bacteria;Chloroflexota;Chloroflexia;;;;	Bacteria	Chloroflexota	Chloroflexia
MtNewZealnordMG_2_bin.40	MtNewZealnordMG_2_bin.40.fa	FALSE	RicNunsandstonMG_4_bin.58	96.15	1.28	4102797	39513	d__Bacteria;p__Actinobacteriota;c__Thermoleophilia;o__Solirubrobacterales;f__Solirubrobacteraceae;g__;s__	Bacteria;Actinobacteriota;Thermoleophilia;Solirubrobacterales;Solirubrobacteraceae;;	Bacteria	Actinobacteriota	Thermoleophilia	Solirubrobacterales	Solirubrobacteraceae
MtNewZealnordMG_2_bin.41	MtNewZealnordMG_2_bin.41.fa	FALSE	RicNunsandstonMG_4_bin.63	74.28	0.93	3196067	13078	d__Bacteria;p__Armatimonadota;c__Chthonomonadetes;o__;f__;g__;s__	Bacteria;Armatimonadota;Chthonomonadetes;;;;	Bacteria	Armatimonadota	Chthonomonadetes
MtNewZealnordMG_2_bin.42	MtNewZealnordMG_2_bin.42.fa	FALSE	RicNunsandstonMG_3_bin.88	91.67	0.93	5411828	67655	d__Bacteria;p__Armatimonadota;c__Chthonomonadetes;o__;f__;g__;s__	Bacteria;Armatimonadota;Chthonomonadetes;;;;	Bacteria	Armatimonadota	Chthonomonadetes
MtNewZealnordMG_2_bin.51	MtNewZealnordMG_2_bin.51.fa	FALSE	UniValnordMG_2_bin.45	80.41	9.84	4083052	10855	d__Bacteria;p__Actinobacteriota;c__Actinobacteria;o__Actinomycetales;f__Dermatophilaceae;g__GCA-2748155;s__	Bacteria;Actinobacteriota;Actinobacteria;Actinomycetales;Dermatophilaceae;GCA-2748155;	Bacteria	Actinobacteriota	Actinobacteria	Actinomycetales	Dermatophilaceae	GCA-2748155
MtNewZealnordMG_2_bin.53	MtNewZealnordMG_2_bin.53.fa	FALSE	LinTernordMG_2_bin.22	65.92	2.25	4580711	6237	d__Bacteria;p__Actinobacteriota;c__Actinobacteria;o__Frankiales;f__Frankiaceae;g__;s__	Bacteria;Actinobacteriota;Actinobacteria;Frankiales;Frankiaceae;;	Bacteria	Actinobacteriota	Actinobacteria	Frankiales	Frankiaceae
MtNewZealnordMG_2_bin.54	MtNewZealnordMG_2_bin.54.fa	FALSE	FingerMtsudMG_2_bin.24	78.24	1.44	3048302	6575	d__Bacteria;p__Actinobacteriota;c__Actinobacteria;o__Frankiales;f__Frankiaceae;g__;s__	Bacteria;Actinobacteriota;Actinobacteria;Frankiales;Frankiaceae;;	Bacteria	Actinobacteriota	Actinobacteria	Frankiales	Frankiaceae
MtNewZealnordMG_2_bin.55	MtNewZealnordMG_2_bin.55.fa	FALSE	RicNunsandstonMG_4_bin.94	78.25	1.89	5850282	7620	d__Bacteria;p__Chloroflexota;c__Chloroflexia;o__;f__;g__;s__	Bacteria;Chloroflexota;Chloroflexia;;;;	Bacteria	Chloroflexota	Chloroflexia
MtNewZealnordMG_2_bin.57	MtNewZealnordMG_2_bin.57.fa	FALSE	PudButsudMG_2_bin.62	80.6	0.99	3366900	7965	d__Bacteria;p__Actinobacteriota;c__Actinobacteria;o__Corynebacteriales;f__Nakamurellaceae;g__Nakamurella;s__	Bacteria;Actinobacteriota;Actinobacteria;Corynebacteriales;Nakamurellaceae;Nakamurella;	Bacteria	Actinobacteriota	Actinobacteria	Corynebacteriales	Nakamurellaceae	Nakamurella
MtNewZealnordMG_2_bin.58	MtNewZealnordMG_2_bin.58.fa	FALSE	SiePeanordMG_2_bin.44	92.45	8.73	2856440	14118	d__Bacteria;p__Actinobacteriota;c__Actinobacteria;o__Frankiales;f__Frankiaceae;g__;s__	Bacteria;Actinobacteriota;Actinobacteria;Frankiales;Frankiaceae;;	Bacteria	Actinobacteriota	Actinobacteria	Frankiales	Frankiaceae
MtNewZealnordMG_2_bin.64	MtNewZealnordMG_2_bin.64.fa	FALSE	UniValsudMG_2_bin.107	96.91	0.93	3124515	153452	d__Bacteria;p__UBP12;c__UBA5184;o__UBA5184;f__UBA5184;g__;s__	Bacteria;UBP12;UBA5184;UBA5184;UBA5184;;	Bacteria	UBP12	UBA5184	UBA5184	UBA5184
MtNewZealnordMG_2_bin.7	MtNewZealnordMG_2_bin.7.fa	TRUE	MtNewZealnordMG_2_bin.7	95.71	1.98	4294652	57873	d__Bacteria;p__Chloroflexota;c__UBA5177;o__UBA5177;f__UBA5177;g__;s__	Bacteria;Chloroflexota;UBA5177;UBA5177;UBA5177;;	Bacteria	Chloroflexota	UBA5177	UBA5177	UBA5177
MtNewZealnordMG_2_bin.71	MtNewZealnordMG_2_bin.71.fa	FALSE	RicNunsandstonMG_4_bin.75	58.48	0.43	1349536	5683	d__Bacteria;p__Actinobacteriota;c__Thermoleophilia;o__Solirubrobacterales;f__Solirubrobacteraceae;g__;s__	Bacteria;Actinobacteriota;Thermoleophilia;Solirubrobacterales;Solirubrobacteraceae;;	Bacteria	Actinobacteriota	Thermoleophilia	Solirubrobacterales	Solirubrobacteraceae
MtNewZealnordMG_2_bin.74	MtNewZealnordMG_2_bin.74.fa	TRUE	MtNewZealnordMG_2_bin.74	99.03	2.33	6139375	40584	d__Bacteria;p__Planctomycetota;c__Planctomycetes;o__Isosphaerales;f__Isosphaeraceae;g__;s__	Bacteria;Planctomycetota;Planctomycetes;Isosphaerales;Isosphaeraceae;;	Bacteria	Planctomycetota	Planctomycetes	Isosphaerales	Isosphaeraceae
MtNewZealnordMG_2_bin.76	MtNewZealnordMG_2_bin.76.fa	FALSE	UniValnordMG_2_bin.36	98.74	1.98	3291883	109468	d__Bacteria;p__Actinobacteriota;c__Actinobacteria;o__Jiangellales;f__;g__;s__	Bacteria;Actinobacteriota;Actinobacteria;Jiangellales;;;	Bacteria	Actinobacteriota	Actinobacteria	Jiangellales
MtNewZealnordMG_2_bin.8	MtNewZealnordMG_2_bin.8.fa	FALSE	UniValsudMG_2_bin.19	96.91	0	3190947	82189	d__Bacteria;p__UBP12;c__UBA5184;o__UBA5184;f__UBA5184;g__;s__	Bacteria;UBP12;UBA5184;UBA5184;UBA5184;;	Bacteria	UBP12	UBA5184	UBA5184	UBA5184
MtNewZealnordMG_2_bin.81	MtNewZealnordMG_2_bin.81.fa	FALSE	RicNunsandstonMG_4_bin.86	96.87	0.43	2827877	74725	d__Bacteria;p__Actinobacteriota;c__Thermoleophilia;o__Solirubrobacterales;f__Solirubrobacteraceae;g__;s__	Bacteria;Actinobacteriota;Thermoleophilia;Solirubrobacterales;Solirubrobacteraceae;;	Bacteria	Actinobacteriota	Thermoleophilia	Solirubrobacterales	Solirubrobacteraceae
MtNewZealnordMG_2_bin.82	MtNewZealnordMG_2_bin.82.fa	FALSE	RickerHillsnord_2_bin.30	68.97	1.72	2551914	6576	d__Bacteria;p__Actinobacteriota;c__Actinobacteria;o__Frankiales;f__;g__;s__	Bacteria;Actinobacteriota;Actinobacteria;Frankiales;;;	Bacteria	Actinobacteriota	Actinobacteria	Frankiales
MtNewZealnordMG_2_bin.9	MtNewZealnordMG_2_bin.9.fa	TRUE	MtNewZealnordMG_2_bin.9	97.86	1.28	2307454	90335	d__Bacteria;p__Actinobacteriota;c__Acidimicrobiia;o__Acidimicrobiales;f__UBA7543;g__;s__	Bacteria;Actinobacteriota;Acidimicrobiia;Acidimicrobiales;UBA7543;;	Bacteria	Actinobacteriota	Acidimicrobiia	Acidimicrobiales	UBA7543
MtNewZealnordMG_2_bin.91	MtNewZealnordMG_2_bin.91.fa	FALSE	SiePeanordMG_2_bin.60	71	5.86	4975519	8418	d__Bacteria;p__Actinobacteriota;c__Actinobacteria;o__Frankiales;f__;g__;s__	Bacteria;Actinobacteriota;Actinobacteria;Frankiales;;;	Bacteria	Actinobacteriota	Actinobacteria	Frankiales
PudButnordMG_2_bin.11	PudButnordMG_2_bin.11.fa	TRUE	PudButnordMG_2_bin.11	90.87	0.88	5048858	25584	d__Bacteria;p__Acidobacteriota;c__Acidobacteriae;o__Solibacterales;f__Solibacteraceae;g__;s__	Bacteria;Acidobacteriota;Acidobacteriae;Solibacterales;Solibacteraceae;;	Bacteria	Acidobacteriota	Acidobacteriae	Solibacterales	Solibacteraceae
PudButnordMG_2_bin.13	PudButnordMG_2_bin.13.fa	TRUE	PudButnordMG_2_bin.13	95.67	7.55	4604500	46736	d__Bacteria;p__Acidobacteriota;c__Blastocatellia;o__Pyrinomonadales;f__Pyrinomonadaceae;g__;s__	Bacteria;Acidobacteriota;Blastocatellia;Pyrinomonadales;Pyrinomonadaceae;;	Bacteria	Acidobacteriota	Blastocatellia	Pyrinomonadales	Pyrinomonadaceae
PudButnordMG_2_bin.18	PudButnordMG_2_bin.18.fa	FALSE	PudButsudMG_2_bin.57	76.75	3.68	3081100	7929	d__Bacteria;p__Proteobacteria;c__Alphaproteobacteria;o__Acetobacterales;f__Acetobacteraceae;g__70-18;s__	Bacteria;Proteobacteria;Alphaproteobacteria;Acetobacterales;Acetobacteraceae;70-18;	Bacteria	Proteobacteria	Alphaproteobacteria	Acetobacterales	Acetobacteraceae	70-18
PudButnordMG_2_bin.2	PudButnordMG_2_bin.2.fa	TRUE	PudButnordMG_2_bin.2	87.5	3.02	2946940	7473	d__Bacteria;p__Actinobacteriota;c__Thermoleophilia;o__Solirubrobacterales;f__Thermoleophilaceae;g__;s__	Bacteria;Actinobacteriota;Thermoleophilia;Solirubrobacterales;Thermoleophilaceae;;	Bacteria	Actinobacteriota	Thermoleophilia	Solirubrobacterales	Thermoleophilaceae
PudButnordMG_2_bin.22	PudButnordMG_2_bin.22.fa	TRUE	PudButnordMG_2_bin.22	77.99	6.71	7868604	6059	d__Bacteria;p__Chloroflexota;c__Chloroflexia;o__;f__;g__;s__	Bacteria;Chloroflexota;Chloroflexia;;;;	Bacteria	Chloroflexota	Chloroflexia
PudButnordMG_2_bin.3	PudButnordMG_2_bin.3.fa	TRUE	PudButnordMG_2_bin.3	97.39	3.57	8394840	19505	d__Bacteria;p__Proteobacteria;c__Alphaproteobacteria;o__Acetobacterales;f__Acetobacteraceae;g__70-18;s__	Bacteria;Proteobacteria;Alphaproteobacteria;Acetobacterales;Acetobacteraceae;70-18;	Bacteria	Proteobacteria	Alphaproteobacteria	Acetobacterales	Acetobacteraceae	70-18
PudButnordMG_2_bin.36	PudButnordMG_2_bin.36.fa	TRUE	PudButnordMG_2_bin.36	96.91	0.5	5280580	27091	d__Bacteria;p__Bacteroidota;c__Bacteroidia;o__Cytophagales;f__Hymenobacteraceae;g__Hymenobacter;s__	Bacteria;Bacteroidota;Bacteroidia;Cytophagales;Hymenobacteraceae;Hymenobacter;	Bacteria	Bacteroidota	Bacteroidia	Cytophagales	Hymenobacteraceae	Hymenobacter
PudButnordMG_2_bin.39	PudButnordMG_2_bin.39.fa	FALSE	PudButsudMG_2_bin.62	98.72	2.74	5832207	64148	d__Bacteria;p__Actinobacteriota;c__Actinobacteria;o__Corynebacteriales;f__Nakamurellaceae;g__Nakamurella;s__	Bacteria;Actinobacteriota;Actinobacteria;Corynebacteriales;Nakamurellaceae;Nakamurella;	Bacteria	Actinobacteriota	Actinobacteria	Corynebacteriales	Nakamurellaceae	Nakamurella
PudButnordMG_2_bin.4	PudButnordMG_2_bin.4.fa	FALSE	ButProsudMG_2_bin.21	100	3.48	5201941	89155	d__Bacteria;p__Actinobacteriota;c__Actinobacteria;o__Corynebacteriales;f__Corynebacteriaceae;g__;s__	Bacteria;Actinobacteriota;Actinobacteria;Corynebacteriales;Corynebacteriaceae;;	Bacteria	Actinobacteriota	Actinobacteria	Corynebacteriales	Corynebacteriaceae
PudButnordMG_2_bin.42	PudButnordMG_2_bin.42.fa	TRUE	PudButnordMG_2_bin.42	99.37	3.45	5376709	32101	d__Bacteria;p__Bacteroidota;c__Bacteroidia;o__Chitinophagales;f__Chitinophagaceae;g__Segetibacter;s__	Bacteria;Bacteroidota;Bacteroidia;Chitinophagales;Chitinophagaceae;Segetibacter;	Bacteria	Bacteroidota	Bacteroidia	Chitinophagales	Chitinophagaceae	Segetibacter
PudButnordMG_2_bin.5	PudButnordMG_2_bin.5.fa	TRUE	PudButnordMG_2_bin.5	54.31	0.34	2044557	4119	d__Bacteria;p__Actinobacteriota;c__Actinobacteria;o__Jiangellales;f__Jiangellaceae;g__;s__	Bacteria;Actinobacteriota;Actinobacteria;Jiangellales;Jiangellaceae;;	Bacteria	Actinobacteriota	Actinobacteria	Jiangellales	Jiangellaceae
PudButnordMG_2_bin.50	PudButnordMG_2_bin.50.fa	FALSE	KnobheadsudMG_2_bin.2	74.31	2.17	3116368	9332	d__Bacteria;p__Actinobacteriota;c__Actinobacteria;o__Actinomycetales;f__Dermatophilaceae;g__GCA-2748155;s__	Bacteria;Actinobacteriota;Actinobacteria;Actinomycetales;Dermatophilaceae;GCA-2748155;	Bacteria	Actinobacteriota	Actinobacteria	Actinomycetales	Dermatophilaceae	GCA-2748155
PudButnordMG_2_bin.53	PudButnordMG_2_bin.53.fa	TRUE	PudButnordMG_2_bin.53	60.53	3.51	4535420	4305	d__Bacteria;p__Planctomycetota;c__Planctomycetes;o__Isosphaerales;f__Isosphaeraceae;g__;s__	Bacteria;Planctomycetota;Planctomycetes;Isosphaerales;Isosphaeraceae;;	Bacteria	Planctomycetota	Planctomycetes	Isosphaerales	Isosphaeraceae
PudButnordMG_2_bin.56	PudButnordMG_2_bin.56.fa	TRUE	PudButnordMG_2_bin.56	96.64	3.49	6336561	14880	d__Bacteria;p__Planctomycetota;c__Planctomycetes;o__Isosphaerales;f__Isosphaeraceae;g__;s__	Bacteria;Planctomycetota;Planctomycetes;Isosphaerales;Isosphaeraceae;;	Bacteria	Planctomycetota	Planctomycetes	Isosphaerales	Isosphaeraceae
PudButnordMG_2_bin.59	PudButnordMG_2_bin.59.fa	TRUE	PudButnordMG_2_bin.59	81.34	5.13	3709250	10581	d__Bacteria;p__Acidobacteriota;c__Blastocatellia;o__Pyrinomonadales;f__Pyrinomonadaceae;g__;s__	Bacteria;Acidobacteriota;Blastocatellia;Pyrinomonadales;Pyrinomonadaceae;;	Bacteria	Acidobacteriota	Blastocatellia	Pyrinomonadales	Pyrinomonadaceae
PudButnordMG_2_bin.60	PudButnordMG_2_bin.60.fa	TRUE	PudButnordMG_2_bin.60	92.69	1.78	5971398	15190	d__Bacteria;p__Bacteroidota;c__Bacteroidia;o__Chitinophagales;f__Chitinophagaceae;g__;s__	Bacteria;Bacteroidota;Bacteroidia;Chitinophagales;Chitinophagaceae;;	Bacteria	Bacteroidota	Bacteroidia	Chitinophagales	Chitinophagaceae
PudButnordMG_2_bin.62	PudButnordMG_2_bin.62.fa	FALSE	RickerHillsnord_2_bin.19	97.86	0.85	3066470	225075	d__Bacteria;p__Actinobacteriota;c__Thermoleophilia;o__Solirubrobacterales;f__Solirubrobacteraceae;g__;s__	Bacteria;Actinobacteriota;Thermoleophilia;Solirubrobacterales;Solirubrobacteraceae;;	Bacteria	Actinobacteriota	Thermoleophilia	Solirubrobacterales	Solirubrobacteraceae
PudButnordMG_2_bin.66	PudButnordMG_2_bin.66.fa	FALSE	KnobheadsudMG_2_bin.4	97.84	0.93	3054591	103497	d__Bacteria;p__UBP12;c__UBA5184;o__UBA5184;f__UBA5184;g__;s__	Bacteria;UBP12;UBA5184;UBA5184;UBA5184;;	Bacteria	UBP12	UBA5184	UBA5184	UBA5184
PudButnordMG_2_bin.67	PudButnordMG_2_bin.67.fa	TRUE	PudButnordMG_2_bin.67	93.06	0	3942532	37800	d__Bacteria;p__Armatimonadota;c__CG2-30-59-28;o__;f__;g__;s__	Bacteria;Armatimonadota;CG2-30-59-28;;;;	Bacteria	Armatimonadota	CG2-30-59-28
PudButnordMG_2_bin.70	PudButnordMG_2_bin.70.fa	FALSE	KnobheadsudMG_2_bin.48	91.48	0.93	4324321	74989	d__Bacteria;p__Armatimonadota;c__Chthonomonadetes;o__;f__;g__;s__	Bacteria;Armatimonadota;Chthonomonadetes;;;;	Bacteria	Armatimonadota	Chthonomonadetes
PudButnordMG_2_bin.75	PudButnordMG_2_bin.75.fa	FALSE	RickerHillsnord_2_bin.25	61.55	2.36	3130204	5108	d__Bacteria;p__Chloroflexota;c__Chloroflexia;o__;f__;g__;s__	Bacteria;Chloroflexota;Chloroflexia;;;;	Bacteria	Chloroflexota	Chloroflexia
PudButnordMG_2_bin.77	PudButnordMG_2_bin.77.fa	FALSE	TrioNunataknord_2_bin.90	77.04	1.05	3373459	7410	d__Bacteria;p__Bacteroidota;c__Bacteroidia;o__Chitinophagales;f__Chitinophagaceae;g__Segetibacter;s__	Bacteria;Bacteroidota;Bacteroidia;Chitinophagales;Chitinophagaceae;Segetibacter;	Bacteria	Bacteroidota	Bacteroidia	Chitinophagales	Chitinophagaceae	Segetibacter
PudButnordMG_2_bin.8	PudButnordMG_2_bin.8.fa	FALSE	RickerHillsnord_2_bin.17	88.03	0	2455154	14316	d__Bacteria;p__Actinobacteriota;c__Thermoleophilia;o__Solirubrobacterales;f__Solirubrobacteraceae;g__;s__	Bacteria;Actinobacteriota;Thermoleophilia;Solirubrobacterales;Solirubrobacteraceae;;	Bacteria	Actinobacteriota	Thermoleophilia	Solirubrobacterales	Solirubrobacteraceae
PudButnordMG_2_bin.80	PudButnordMG_2_bin.80.fa	FALSE	PudButsudMG_2_bin.15	97.65	0.85	3899600	105018	d__Bacteria;p__Acidobacteriota;c__Acidobacteriae;o__Acidobacteriales;f__Acidobacteriaceae;g__;s__	Bacteria;Acidobacteriota;Acidobacteriae;Acidobacteriales;Acidobacteriaceae;;	Bacteria	Acidobacteriota	Acidobacteriae	Acidobacteriales	Acidobacteriaceae
PudButnordMG_2_bin.81	PudButnordMG_2_bin.81.fa	TRUE	PudButnordMG_2_bin.81	72.42	2.16	3813827	5890	d__Bacteria;p__Actinobacteriota;c__Actinobacteria;o__Propionibacteriales;f__Actinopolymorphaceae;g__;s__	Bacteria;Actinobacteriota;Actinobacteria;Propionibacteriales;Actinopolymorphaceae;;	Bacteria	Actinobacteriota	Actinobacteria	Propionibacteriales	Actinopolymorphaceae
PudButnordMG_2_bin.83	PudButnordMG_2_bin.83.fa	FALSE	UniValnordMG_2_bin.36	53.8	2.02	1868745	4669	d__Bacteria;p__Actinobacteriota;c__Actinobacteria;o__Jiangellales;f__;g__;s__	Bacteria;Actinobacteriota;Actinobacteria;Jiangellales;;;	Bacteria	Actinobacteriota	Actinobacteria	Jiangellales
PudButnordMG_2_bin.85	PudButnordMG_2_bin.85.fa	TRUE	PudButnordMG_2_bin.85	99.09	0.85	4501055	114495	d__Bacteria;p__Acidobacteriota;c__Acidobacteriae;o__Acidobacteriales;f__Acidobacteriaceae;g__;s__	Bacteria;Acidobacteriota;Acidobacteriae;Acidobacteriales;Acidobacteriaceae;;	Bacteria	Acidobacteriota	Acidobacteriae	Acidobacteriales	Acidobacteriaceae
PudButnordMG_2_bin.88	PudButnordMG_2_bin.88.fa	TRUE	PudButnordMG_2_bin.88	94.23	0	3600372	180747	d__Bacteria;p__Acidobacteriota;c__Acidobacteriae;o__Acidobacteriales;f__Acidobacteriaceae;g__;s__	Bacteria;Acidobacteriota;Acidobacteriae;Acidobacteriales;Acidobacteriaceae;;	Bacteria	Acidobacteriota	Acidobacteriae	Acidobacteriales	Acidobacteriaceae
PudButnordMG_2_bin.90	PudButnordMG_2_bin.90.fa	TRUE	PudButnordMG_2_bin.90	96.27	2.74	7632054	26995	d__Bacteria;p__Proteobacteria;c__Alphaproteobacteria;o__Acetobacterales;f__Acetobacteraceae;g__70-18;s__	Bacteria;Proteobacteria;Alphaproteobacteria;Acetobacterales;Acetobacteraceae;70-18;	Bacteria	Proteobacteria	Alphaproteobacteria	Acetobacterales	Acetobacteraceae	70-18
PudButnordMG_2_bin.95	PudButnordMG_2_bin.95.fa	TRUE	PudButnordMG_2_bin.95	99.61	1.16	7093949	42611	d__Bacteria;p__Planctomycetota;c__Planctomycetes;o__Isosphaerales;f__Isosphaeraceae;g__;s__	Bacteria;Planctomycetota;Planctomycetes;Isosphaerales;Isosphaeraceae;;	Bacteria	Planctomycetota	Planctomycetes	Isosphaerales	Isosphaeraceae
PudButsudMG_2_bin.11	PudButsudMG_2_bin.11.fa	FALSE	RickerHillsnord_2_bin.17	97.44	0	3145654	104066	d__Bacteria;p__Actinobacteriota;c__Thermoleophilia;o__Solirubrobacterales;f__Solirubrobacteraceae;g__;s__	Bacteria;Actinobacteriota;Thermoleophilia;Solirubrobacterales;Solirubrobacteraceae;;	Bacteria	Actinobacteriota	Thermoleophilia	Solirubrobacterales	Solirubrobacteraceae
PudButsudMG_2_bin.15	PudButsudMG_2_bin.15.fa	TRUE	PudButsudMG_2_bin.15	97.65	0.85	3995156	134848	d__Bacteria;p__Acidobacteriota;c__Acidobacteriae;o__Acidobacteriales;f__Acidobacteriaceae;g__;s__	Bacteria;Acidobacteriota;Acidobacteriae;Acidobacteriales;Acidobacteriaceae;;	Bacteria	Acidobacteriota	Acidobacteriae	Acidobacteriales	Acidobacteriaceae
PudButsudMG_2_bin.19	PudButsudMG_2_bin.19.fa	FALSE	UniValnordMG_2_bin.58	97.49	4.23	6014766	23346	d__Bacteria;p__Proteobacteria;c__Alphaproteobacteria;o__Rhizobiales;f__Beijerinckiaceae;g__;s__	Bacteria;Proteobacteria;Alphaproteobacteria;Rhizobiales;Beijerinckiaceae;;	Bacteria	Proteobacteria	Alphaproteobacteria	Rhizobiales	Beijerinckiaceae
PudButsudMG_2_bin.22	PudButsudMG_2_bin.22.fa	FALSE	MtNewZealnordMG_2_bin.74	63.65	0.58	3909174	5207	d__Bacteria;p__Planctomycetota;c__Planctomycetes;o__Isosphaerales;f__Isosphaeraceae;g__;s__	Bacteria;Planctomycetota;Planctomycetes;Isosphaerales;Isosphaeraceae;;	Bacteria	Planctomycetota	Planctomycetes	Isosphaerales	Isosphaeraceae
PudButsudMG_2_bin.32	PudButsudMG_2_bin.32.fa	FALSE	PudButnordMG_2_bin.90	87.58	2.12	7489980	7098	d__Bacteria;p__Proteobacteria;c__Alphaproteobacteria;o__Acetobacterales;f__Acetobacteraceae;g__70-18;s__	Bacteria;Proteobacteria;Alphaproteobacteria;Acetobacterales;Acetobacteraceae;70-18;	Bacteria	Proteobacteria	Alphaproteobacteria	Acetobacterales	Acetobacteraceae	70-18
PudButsudMG_2_bin.38	PudButsudMG_2_bin.38.fa	TRUE	PudButsudMG_2_bin.38	98.28	1.98	4639873	72985	d__Bacteria;p__Chloroflexota;c__UBA5177;o__UBA5177;f__UBA5177;g__;s__	Bacteria;Chloroflexota;UBA5177;UBA5177;UBA5177;;	Bacteria	Chloroflexota	UBA5177	UBA5177	UBA5177
PudButsudMG_2_bin.44	PudButsudMG_2_bin.44.fa	TRUE	PudButsudMG_2_bin.44	97.22	0.93	5175327	53702	d__Bacteria;p__Armatimonadota;c__Chthonomonadetes;o__;f__;g__;s__	Bacteria;Armatimonadota;Chthonomonadetes;;;;	Bacteria	Armatimonadota	Chthonomonadetes
PudButsudMG_2_bin.46	PudButsudMG_2_bin.46.fa	TRUE	PudButsudMG_2_bin.46	86.73	0	3980036	53624	d__Bacteria;p__Armatimonadota;c__Chthonomonadetes;o__;f__;g__;s__	Bacteria;Armatimonadota;Chthonomonadetes;;;;	Bacteria	Armatimonadota	Chthonomonadetes
PudButsudMG_2_bin.51	PudButsudMG_2_bin.51.fa	FALSE	RickerHillsnord_2_bin.19	96.15	3.42	3139849	31187	d__Bacteria;p__Actinobacteriota;c__Thermoleophilia;o__Solirubrobacterales;f__Solirubrobacteraceae;g__;s__	Bacteria;Actinobacteriota;Thermoleophilia;Solirubrobacterales;Solirubrobacteraceae;;	Bacteria	Actinobacteriota	Thermoleophilia	Solirubrobacterales	Solirubrobacteraceae
PudButsudMG_2_bin.57	PudButsudMG_2_bin.57.fa	TRUE	PudButsudMG_2_bin.57	86.76	1.86	3503500	8697	d__Bacteria;p__Proteobacteria;c__Alphaproteobacteria;o__Acetobacterales;f__Acetobacteraceae;g__70-18;s__	Bacteria;Proteobacteria;Alphaproteobacteria;Acetobacterales;Acetobacteraceae;70-18;	Bacteria	Proteobacteria	Alphaproteobacteria	Acetobacterales	Acetobacteraceae	70-18
PudButsudMG_2_bin.59	PudButsudMG_2_bin.59.fa	TRUE	PudButsudMG_2_bin.59	66.49	7.4	8820318	19689	d__Bacteria;p__Chloroflexota;c__UBA5177;o__;f__;g__;s__	Bacteria;Chloroflexota;UBA5177;;;;	Bacteria	Chloroflexota	UBA5177
PudButsudMG_2_bin.62	PudButsudMG_2_bin.62.fa	TRUE	PudButsudMG_2_bin.62	98.72	1.45	5207754	64148	d__Bacteria;p__Actinobacteriota;c__Actinobacteria;o__Corynebacteriales;f__Nakamurellaceae;g__Nakamurella;s__	Bacteria;Actinobacteriota;Actinobacteria;Corynebacteriales;Nakamurellaceae;Nakamurella;	Bacteria	Actinobacteriota	Actinobacteria	Corynebacteriales	Nakamurellaceae	Nakamurella
PudButsudMG_2_bin.71	PudButsudMG_2_bin.71.fa	FALSE	KnobheadsudMG_2_bin.4	96.91	0.93	3028596	103497	d__Bacteria;p__UBP12;c__UBA5184;o__UBA5184;f__UBA5184;g__;s__	Bacteria;UBP12;UBA5184;UBA5184;UBA5184;;	Bacteria	UBP12	UBA5184	UBA5184	UBA5184
PudButsudMG_2_bin.78	PudButsudMG_2_bin.78.fa	TRUE	PudButsudMG_2_bin.78	99.55	0.72	3647565	108319	d__Bacteria;p__Actinobacteriota;c__Actinobacteria;o__Jiangellales;f__;g__;s__	Bacteria;Actinobacteriota;Actinobacteria;Jiangellales;;;	Bacteria	Actinobacteriota	Actinobacteria	Jiangellales
PudButsudMG_2_bin.82	PudButsudMG_2_bin.82.fa	FALSE	KnobheadsudMG_2_bin.80	76.14	5.83	7434860	15049	d__Bacteria;p__Chloroflexota;c__UBA5177;o__;f__;g__;s__	Bacteria;Chloroflexota;UBA5177;;;;	Bacteria	Chloroflexota	UBA5177
RickerHillsnord_2_bin.11	RickerHillsnord_2_bin.11.fa	TRUE	RickerHillsnord_2_bin.11	95.24	0.24	4049997	101815	d__Bacteria;p__Bacteroidota;c__Bacteroidia;o__Sphingobacteriales;f__Sphingobacteriaceae;g__;s__	Bacteria;Bacteroidota;Bacteroidia;Sphingobacteriales;Sphingobacteriaceae;;	Bacteria	Bacteroidota	Bacteroidia	Sphingobacteriales	Sphingobacteriaceae
RickerHillsnord_2_bin.17	RickerHillsnord_2_bin.17.fa	TRUE	RickerHillsnord_2_bin.17	98.29	0.07	3139948	78187	d__Bacteria;p__Actinobacteriota;c__Thermoleophilia;o__Solirubrobacterales;f__Solirubrobacteraceae;g__;s__	Bacteria;Actinobacteriota;Thermoleophilia;Solirubrobacterales;Solirubrobacteraceae;;	Bacteria	Actinobacteriota	Thermoleophilia	Solirubrobacterales	Solirubrobacteraceae
RickerHillsnord_2_bin.19	RickerHillsnord_2_bin.19.fa	TRUE	RickerHillsnord_2_bin.19	97.01	0.43	2887856	624779	d__Bacteria;p__Actinobacteriota;c__Thermoleophilia;o__Solirubrobacterales;f__Solirubrobacteraceae;g__;s__	Bacteria;Actinobacteriota;Thermoleophilia;Solirubrobacterales;Solirubrobacteraceae;;	Bacteria	Actinobacteriota	Thermoleophilia	Solirubrobacterales	Solirubrobacteraceae
RickerHillsnord_2_bin.20	RickerHillsnord_2_bin.20.fa	FALSE	SiePeanordMG_2_bin.60	99.11	2.7	6976979	40089	d__Bacteria;p__Actinobacteriota;c__Actinobacteria;o__Frankiales;f__Frankiaceae;g__;s__	Bacteria;Actinobacteriota;Actinobacteria;Frankiales;Frankiaceae;;	Bacteria	Actinobacteriota	Actinobacteria	Frankiales	Frankiaceae
RickerHillsnord_2_bin.22	RickerHillsnord_2_bin.22.fa	FALSE	TrioNunataknord_2_bin.29	93.42	2.43	3328094	39915	d__Bacteria;p__Actinobacteriota;c__Actinobacteria;o__Corynebacteriales;f__Corynebacteriaceae;g__;s__	Bacteria;Actinobacteriota;Actinobacteria;Corynebacteriales;Corynebacteriaceae;;	Bacteria	Actinobacteriota	Actinobacteria	Corynebacteriales	Corynebacteriaceae
RickerHillsnord_2_bin.23	RickerHillsnord_2_bin.23.fa	TRUE	RickerHillsnord_2_bin.23	99.12	0.59	4682746	74562	d__Bacteria;p__Actinobacteriota;c__Actinobacteria;o__Propionibacteriales;f__Actinopolymorphaceae;g__;s__	Bacteria;Actinobacteriota;Actinobacteria;Propionibacteriales;Actinopolymorphaceae;;	Bacteria	Actinobacteriota	Actinobacteria	Propionibacteriales	Actinopolymorphaceae
RickerHillsnord_2_bin.25	RickerHillsnord_2_bin.25.fa	TRUE	RickerHillsnord_2_bin.25	98.11	1.89	5106037	24408	d__Bacteria;p__Chloroflexota;c__Chloroflexia;o__;f__;g__;s__	Bacteria;Chloroflexota;Chloroflexia;;;;	Bacteria	Chloroflexota	Chloroflexia
RickerHillsnord_2_bin.26	RickerHillsnord_2_bin.26.fa	TRUE	RickerHillsnord_2_bin.26	86.36	0.86	3407737	64486	d__Bacteria;p__Actinobacteriota;c__Actinobacteria;o__Frankiales;f__Frankiaceae;g__;s__	Bacteria;Actinobacteriota;Actinobacteria;Frankiales;Frankiaceae;;	Bacteria	Actinobacteriota	Actinobacteria	Frankiales	Frankiaceae
RickerHillsnord_2_bin.27	RickerHillsnord_2_bin.27.fa	FALSE	FingerMtsudMG_2_bin.24	61.99	1.8	2078259	4480	d__Bacteria;p__Actinobacteriota;c__Actinobacteria;o__Frankiales;f__Frankiaceae;g__;s__	Bacteria;Actinobacteriota;Actinobacteria;Frankiales;Frankiaceae;;	Bacteria	Actinobacteriota	Actinobacteria	Frankiales	Frankiaceae
RickerHillsnord_2_bin.29	RickerHillsnord_2_bin.29.fa	TRUE	RickerHillsnord_2_bin.29	74.85	6.14	2351566	7426	d__Bacteria;p__Actinobacteriota;c__Actinobacteria;o__Corynebacteriales;f__Geodermatophilaceae;g__;s__	Bacteria;Actinobacteriota;Actinobacteria;Corynebacteriales;Geodermatophilaceae;;	Bacteria	Actinobacteriota	Actinobacteria	Corynebacteriales	Geodermatophilaceae
RickerHillsnord_2_bin.30	RickerHillsnord_2_bin.30.fa	TRUE	RickerHillsnord_2_bin.30	97.49	1.89	3278910	17455	d__Bacteria;p__Actinobacteriota;c__Actinobacteria;o__Frankiales;f__;g__;s__	Bacteria;Actinobacteriota;Actinobacteria;Frankiales;;;	Bacteria	Actinobacteriota	Actinobacteria	Frankiales
RickerHillsnord_2_bin.31	RickerHillsnord_2_bin.31.fa	FALSE	UniValnordMG_2_bin.58	93.07	2.06	5545044	16229	d__Bacteria;p__Proteobacteria;c__Alphaproteobacteria;o__Rhizobiales;f__Beijerinckiaceae;g__;s__	Bacteria;Proteobacteria;Alphaproteobacteria;Rhizobiales;Beijerinckiaceae;;	Bacteria	Proteobacteria	Alphaproteobacteria	Rhizobiales	Beijerinckiaceae
RickerHillsnord_2_bin.32	RickerHillsnord_2_bin.32.fa	TRUE	RickerHillsnord_2_bin.32	87.47	2.65	4086836	14642	d__Bacteria;p__Proteobacteria;c__Alphaproteobacteria;o__Acetobacterales;f__Acetobacteraceae;g__70-18;s__	Bacteria;Proteobacteria;Alphaproteobacteria;Acetobacterales;Acetobacteraceae;70-18;	Bacteria	Proteobacteria	Alphaproteobacteria	Acetobacterales	Acetobacteraceae	70-18
RickerHillsnord_2_bin.34	RickerHillsnord_2_bin.34.fa	TRUE	RickerHillsnord_2_bin.34	99.19	8.11	8810123	16600	d__Bacteria;p__Actinobacteriota;c__Actinobacteria;o__Frankiales;f__Frankiaceae;g__;s__	Bacteria;Actinobacteriota;Actinobacteria;Frankiales;Frankiaceae;;	Bacteria	Actinobacteriota	Actinobacteria	Frankiales	Frankiaceae
RickerHillsnord_2_bin.36	RickerHillsnord_2_bin.36.fa	TRUE	RickerHillsnord_2_bin.36	93.81	6.38	5801178	56811	d__Bacteria;p__Actinobacteriota;c__Actinobacteria;o__Corynebacteriales;f__Jatrophihabitantaceae;g__Iso899;s__	Bacteria;Actinobacteriota;Actinobacteria;Corynebacteriales;Jatrophihabitantaceae;Iso899;	Bacteria	Actinobacteriota	Actinobacteria	Corynebacteriales	Jatrophihabitantaceae	Iso899
RickerHillsnord_2_bin.37	RickerHillsnord_2_bin.37.fa	TRUE	RickerHillsnord_2_bin.37	90.2	4.31	3629803	12333	d__Bacteria;p__Actinobacteriota;c__Actinobacteria;o__Frankiales;f__Frankiaceae;g__;s__	Bacteria;Actinobacteriota;Actinobacteria;Frankiales;Frankiaceae;;	Bacteria	Actinobacteriota	Actinobacteria	Frankiales	Frankiaceae
RickerHillsnord_2_bin.38	RickerHillsnord_2_bin.38.fa	FALSE	PudButnordMG_2_bin.90	87.85	5.35	6280693	9703	d__Bacteria;p__Proteobacteria;c__Alphaproteobacteria;o__Acetobacterales;f__Acetobacteraceae;g__70-18;s__	Bacteria;Proteobacteria;Alphaproteobacteria;Acetobacterales;Acetobacteraceae;70-18;	Bacteria	Proteobacteria	Alphaproteobacteria	Acetobacterales	Acetobacteraceae	70-18
RickerHillsnord_2_bin.48	RickerHillsnord_2_bin.48.fa	TRUE	RickerHillsnord_2_bin.48	95.99	0.5	3726360	26043	d__Bacteria;p__Proteobacteria;c__Alphaproteobacteria;o__Acetobacterales;f__Acetobacteraceae;g__;s__	Bacteria;Proteobacteria;Alphaproteobacteria;Acetobacterales;Acetobacteraceae;;	Bacteria	Proteobacteria	Alphaproteobacteria	Acetobacterales	Acetobacteraceae
RickerHillsnord_2_bin.5	RickerHillsnord_2_bin.5.fa	FALSE	PudButsudMG_2_bin.62	80.44	2.38	3817312	11684	d__Bacteria;p__Actinobacteriota;c__Actinobacteria;o__Corynebacteriales;f__Nakamurellaceae;g__Nakamurella;s__	Bacteria;Actinobacteriota;Actinobacteria;Corynebacteriales;Nakamurellaceae;Nakamurella;	Bacteria	Actinobacteriota	Actinobacteria	Corynebacteriales	Nakamurellaceae	Nakamurella
RickerHillsnord_2_bin.50	RickerHillsnord_2_bin.50.fa	TRUE	RickerHillsnord_2_bin.50	72.45	8.62	3039889	5641	d__Bacteria;p__Actinobacteriota;c__Actinobacteria;o__Actinomycetales;f__Dermatophilaceae;g__GCA-2748155;s__	Bacteria;Actinobacteriota;Actinobacteria;Actinomycetales;Dermatophilaceae;GCA-2748155;	Bacteria	Actinobacteriota	Actinobacteria	Actinomycetales	Dermatophilaceae	GCA-2748155
RickerHillsnord_2_bin.52	RickerHillsnord_2_bin.52.fa	FALSE	ButProsudMG_2_bin.21	81.25	1.54	4176299	11281	d__Bacteria;p__Actinobacteriota;c__Actinobacteria;o__Corynebacteriales;f__Corynebacteriaceae;g__;s__	Bacteria;Actinobacteriota;Actinobacteria;Corynebacteriales;Corynebacteriaceae;;	Bacteria	Actinobacteriota	Actinobacteria	Corynebacteriales	Corynebacteriaceae
RickerHillsnord_2_bin.54	RickerHillsnord_2_bin.54.fa	TRUE	RickerHillsnord_2_bin.54	95.77	0.25	5127552	25610	d__Bacteria;p__Proteobacteria;c__Alphaproteobacteria;o__Acetobacterales;f__Acetobacteraceae;g__70-18;s__	Bacteria;Proteobacteria;Alphaproteobacteria;Acetobacterales;Acetobacteraceae;70-18;	Bacteria	Proteobacteria	Alphaproteobacteria	Acetobacterales	Acetobacteraceae	70-18
RickerHillsnord_2_bin.55	RickerHillsnord_2_bin.55.fa	TRUE	RickerHillsnord_2_bin.55	94.98	2.76	4399153	18589	d__Bacteria;p__Actinobacteriota;c__Actinobacteria;o__Corynebacteriales;f__Jatrophihabitantaceae;g__Jatrophihabitans;s__	Bacteria;Actinobacteriota;Actinobacteria;Corynebacteriales;Jatrophihabitantaceae;Jatrophihabitans;	Bacteria	Actinobacteriota	Actinobacteria	Corynebacteriales	Jatrophihabitantaceae	Jatrophihabitans
RickerHillsnord_2_bin.56	RickerHillsnord_2_bin.56.fa	FALSE	UniValnordMG_2_bin.45	92.54	4.92	2925716	11837	d__Bacteria;p__Actinobacteriota;c__Actinobacteria;o__Actinomycetales;f__Dermatophilaceae;g__GCA-2748155;s__	Bacteria;Actinobacteriota;Actinobacteria;Actinomycetales;Dermatophilaceae;GCA-2748155;	Bacteria	Actinobacteriota	Actinobacteria	Actinomycetales	Dermatophilaceae	GCA-2748155
RickerHillsnord_2_bin.62	RickerHillsnord_2_bin.62.fa	FALSE	SiePeanordMG_2_bin.56	99.46	7.12	4781159	76989	d__Bacteria;p__Actinobacteriota;c__Actinobacteria;o__Actinomycetales;f__Dermatophilaceae;g__GCA-2748155;s__	Bacteria;Actinobacteriota;Actinobacteria;Actinomycetales;Dermatophilaceae;GCA-2748155;	Bacteria	Actinobacteriota	Actinobacteria	Actinomycetales	Dermatophilaceae	GCA-2748155
RickerHillsnord_2_bin.63	RickerHillsnord_2_bin.63.fa	TRUE	RickerHillsnord_2_bin.63	98.03	1.72	5801261	65770	d__Bacteria;p__Bacteroidota;c__Bacteroidia;o__Chitinophagales;f__Chitinophagaceae;g__Segetibacter;s__	Bacteria;Bacteroidota;Bacteroidia;Chitinophagales;Chitinophagaceae;Segetibacter;	Bacteria	Bacteroidota	Bacteroidia	Chitinophagales	Chitinophagaceae	Segetibacter
RickerHillsnord_2_bin.68	RickerHillsnord_2_bin.68.fa	FALSE	SiePeasudMG_2_bin.73	66.37	1.89	4512175	7545	d__Bacteria;p__Chloroflexota;c__Chloroflexia;o__;f__;g__;s__	Bacteria;Chloroflexota;Chloroflexia;;;;	Bacteria	Chloroflexota	Chloroflexia
RickerHillsnord_2_bin.7	RickerHillsnord_2_bin.7.fa	FALSE	LinTernordMG_2_bin.4	87.5	0.75	3883788	23512	d__Bacteria;p__Actinobacteriota;c__Actinobacteria;o__Corynebacteriales;f__Nakamurellaceae;g__Nakamurella_A;s__	Bacteria;Actinobacteriota;Actinobacteria;Corynebacteriales;Nakamurellaceae;Nakamurella_A;	Bacteria	Actinobacteriota	Actinobacteria	Corynebacteriales	Nakamurellaceae	Nakamurella_A
RickerHillsnord_2_bin.8	RickerHillsnord_2_bin.8.fa	TRUE	RickerHillsnord_2_bin.8	92.38	1.35	3590319	44736	d__Bacteria;p__Bacteroidota;c__Bacteroidia;o__Sphingobacteriales;f__Sphingobacteriaceae;g__;s__	Bacteria;Bacteroidota;Bacteroidia;Sphingobacteriales;Sphingobacteriaceae;;	Bacteria	Bacteroidota	Bacteroidia	Sphingobacteriales	Sphingobacteriaceae
RicNunsandstonMG_3_bin.1	RicNunsandstonMG_3_bin.1.fa	TRUE	RicNunsandstonMG_3_bin.1	81.86	2.31	2274946	7422	d__Bacteria;p__Dormibacterota;c__Dormibacteria;o__UBA8260;f__UBA8260;g__;s__	Bacteria;Dormibacterota;Dormibacteria;UBA8260;UBA8260;;	Bacteria	Dormibacterota	Dormibacteria	UBA8260	UBA8260
RicNunsandstonMG_3_bin.101	RicNunsandstonMG_3_bin.101.fa	FALSE	FingerMtnordMG_2_bin.118	55.68	1.85	3137657	7776	d__Bacteria;p__Armatimonadota;c__Chthonomonadetes;o__;f__;g__;s__	Bacteria;Armatimonadota;Chthonomonadetes;;;;	Bacteria	Armatimonadota	Chthonomonadetes
RicNunsandstonMG_3_bin.11	RicNunsandstonMG_3_bin.11.fa	TRUE	RicNunsandstonMG_3_bin.11	84.38	1.27	5750565	11405	d__Bacteria;p__Planctomycetota;c__Planctomycetes;o__Isosphaerales;f__Isosphaeraceae;g__;s__	Bacteria;Planctomycetota;Planctomycetes;Isosphaerales;Isosphaeraceae;;	Bacteria	Planctomycetota	Planctomycetes	Isosphaerales	Isosphaeraceae
RicNunsandstonMG_3_bin.12	RicNunsandstonMG_3_bin.12.fa	TRUE	RicNunsandstonMG_3_bin.12	60.87	8.91	3600735	6209	d__Bacteria;p__Chloroflexota;c__UBA5177;o__;f__;g__;s__	Bacteria;Chloroflexota;UBA5177;;;;	Bacteria	Chloroflexota	UBA5177
RicNunsandstonMG_3_bin.13	RicNunsandstonMG_3_bin.13.fa	TRUE	RicNunsandstonMG_3_bin.13	59.41	0	1322563	6085	d__Bacteria;p__UBP12;c__UBA5184;o__UBA5184;f__UBA5184;g__;s__	Bacteria;UBP12;UBA5184;UBA5184;UBA5184;;	Bacteria	UBP12	UBA5184	UBA5184	UBA5184
RicNunsandstonMG_3_bin.19	RicNunsandstonMG_3_bin.19.fa	TRUE	RicNunsandstonMG_3_bin.19	97.53	1.85	3892451	178551	d__Bacteria;p__UBP12;c__UBA5184;o__UBA5184;f__UBA5184;g__;s__	Bacteria;UBP12;UBA5184;UBA5184;UBA5184;;	Bacteria	UBP12	UBA5184	UBA5184	UBA5184
RicNunsandstonMG_3_bin.20	RicNunsandstonMG_3_bin.20.fa	FALSE	FingerMtnordMG_2_bin.120	63.58	0.62	2290680	142769	d__Bacteria;p__UBP12;c__UBA5184;o__UBA5184;f__UBA5184;g__;s__	Bacteria;UBP12;UBA5184;UBA5184;UBA5184;;	Bacteria	UBP12	UBA5184	UBA5184	UBA5184
RicNunsandstonMG_3_bin.21	RicNunsandstonMG_3_bin.21.fa	TRUE	RicNunsandstonMG_3_bin.21	96.45	1.85	3555411	157766	d__Bacteria;p__UBP12;c__UBA5184;o__UBA5184;f__UBA5184;g__;s__	Bacteria;UBP12;UBA5184;UBA5184;UBA5184;;	Bacteria	UBP12	UBA5184	UBA5184	UBA5184
RicNunsandstonMG_3_bin.25	RicNunsandstonMG_3_bin.25.fa	TRUE	RicNunsandstonMG_3_bin.25	88.5	8.68	4286451	15729	d__Bacteria;p__Proteobacteria;c__Alphaproteobacteria;o__Acetobacterales;f__Acetobacteraceae;g__70-18;s__	Bacteria;Proteobacteria;Alphaproteobacteria;Acetobacterales;Acetobacteraceae;70-18;	Bacteria	Proteobacteria	Alphaproteobacteria	Acetobacterales	Acetobacteraceae	70-18
RicNunsandstonMG_3_bin.26	RicNunsandstonMG_3_bin.26.fa	TRUE	RicNunsandstonMG_3_bin.26	74.3	1.85	2015448	6360	d__Bacteria;p__Dormibacterota;c__Dormibacteria;o__Dormibacterales;f__Dormibacteraceae;g__;s__	Bacteria;Dormibacterota;Dormibacteria;Dormibacterales;Dormibacteraceae;;	Bacteria	Dormibacterota	Dormibacteria	Dormibacterales	Dormibacteraceae
RicNunsandstonMG_3_bin.35	RicNunsandstonMG_3_bin.35.fa	TRUE	RicNunsandstonMG_3_bin.35	93.23	2.97	5181161	56969	d__Bacteria;p__Chloroflexota;c__Ktedonobacteria;o__Ktedonobacterales;f__Ktedonobacteraceae;g__UBA7999;s__	Bacteria;Chloroflexota;Ktedonobacteria;Ktedonobacterales;Ktedonobacteraceae;UBA7999;	Bacteria	Chloroflexota	Ktedonobacteria	Ktedonobacterales	Ktedonobacteraceae	UBA7999
RicNunsandstonMG_3_bin.36	RicNunsandstonMG_3_bin.36.fa	FALSE	LinTernordMG_2_bin.22	89.06	3.33	3905573	10660	d__Bacteria;p__Actinobacteriota;c__Actinobacteria;o__Frankiales;f__Frankiaceae;g__;s__	Bacteria;Actinobacteriota;Actinobacteria;Frankiales;Frankiaceae;;	Bacteria	Actinobacteriota	Actinobacteria	Frankiales	Frankiaceae
RicNunsandstonMG_3_bin.39	RicNunsandstonMG_3_bin.39.fa	FALSE	MtNewZealnordMG_2_bin.10	64.55	2.14	3269118	5036	d__Bacteria;p__Actinobacteriota;c__Thermoleophilia;o__Solirubrobacterales;f__Solirubrobacteraceae;g__;s__	Bacteria;Actinobacteriota;Thermoleophilia;Solirubrobacterales;Solirubrobacteraceae;;	Bacteria	Actinobacteriota	Thermoleophilia	Solirubrobacterales	Solirubrobacteraceae
RicNunsandstonMG_3_bin.41	RicNunsandstonMG_3_bin.41.fa	FALSE	FingerMtsudMG_2_bin.3	95.69	5.17	5948693	112408	d__Bacteria;p__Acidobacteriota;c__Acidobacteriae;o__Acidobacteriales;f__Acidobacteriaceae;g__;s__	Bacteria;Acidobacteriota;Acidobacteriae;Acidobacteriales;Acidobacteriaceae;;	Bacteria	Acidobacteriota	Acidobacteriae	Acidobacteriales	Acidobacteriaceae
RicNunsandstonMG_3_bin.43	RicNunsandstonMG_3_bin.43.fa	TRUE	RicNunsandstonMG_3_bin.43	81.51	1.74	3112855	29944	d__Bacteria;p__Proteobacteria;c__Alphaproteobacteria;o__Acetobacterales;f__Acetobacteraceae;g__70-18;s__	Bacteria;Proteobacteria;Alphaproteobacteria;Acetobacterales;Acetobacteraceae;70-18;	Bacteria	Proteobacteria	Alphaproteobacteria	Acetobacterales	Acetobacteraceae	70-18
RicNunsandstonMG_3_bin.47	RicNunsandstonMG_3_bin.47.fa	TRUE	RicNunsandstonMG_3_bin.47	88.7	0.88	2455979	9921	d__Bacteria;p__Proteobacteria;c__Alphaproteobacteria;o__Sphingomonadales;f__Sphingomonadaceae;g__;s__	Bacteria;Proteobacteria;Alphaproteobacteria;Sphingomonadales;Sphingomonadaceae;;	Bacteria	Proteobacteria	Alphaproteobacteria	Sphingomonadales	Sphingomonadaceae
RicNunsandstonMG_3_bin.48	RicNunsandstonMG_3_bin.48.fa	TRUE	RicNunsandstonMG_3_bin.48	95.77	1.24	6012734	27406	d__Bacteria;p__Proteobacteria;c__Alphaproteobacteria;o__Acetobacterales;f__Acetobacteraceae;g__70-18;s__	Bacteria;Proteobacteria;Alphaproteobacteria;Acetobacterales;Acetobacteraceae;70-18;	Bacteria	Proteobacteria	Alphaproteobacteria	Acetobacterales	Acetobacteraceae	70-18
RicNunsandstonMG_3_bin.55	RicNunsandstonMG_3_bin.55.fa	FALSE	FingerMtnordMG_2_bin.38	66.64	2.78	2425237	6422	d__Bacteria;p__UBP12;c__UBA5184;o__UBA5184;f__UBA5184;g__;s__	Bacteria;UBP12;UBA5184;UBA5184;UBA5184;;	Bacteria	UBP12	UBA5184	UBA5184	UBA5184
RicNunsandstonMG_3_bin.58	RicNunsandstonMG_3_bin.58.fa	TRUE	RicNunsandstonMG_3_bin.58	58.22	0.93	2981558	6436	d__Bacteria;p__Armatimonadota;c__Chthonomonadetes;o__;f__;g__;s__	Bacteria;Armatimonadota;Chthonomonadetes;;;;	Bacteria	Armatimonadota	Chthonomonadetes
RicNunsandstonMG_3_bin.59	RicNunsandstonMG_3_bin.59.fa	FALSE	UniValnordMG_2_bin.36	85.69	5.54	4086533	8275	d__Bacteria;p__Actinobacteriota;c__Actinobacteria;o__Jiangellales;f__;g__;s__	Bacteria;Actinobacteriota;Actinobacteria;Jiangellales;;;	Bacteria	Actinobacteriota	Actinobacteria	Jiangellales
RicNunsandstonMG_3_bin.62	RicNunsandstonMG_3_bin.62.fa	TRUE	RicNunsandstonMG_3_bin.62	96.55	0	3591229	57798	d__Bacteria;p__Acidobacteriota;c__Acidobacteriae;o__Acidobacteriales;f__Acidobacteriaceae;g__;s__	Bacteria;Acidobacteriota;Acidobacteriae;Acidobacteriales;Acidobacteriaceae;;	Bacteria	Acidobacteriota	Acidobacteriae	Acidobacteriales	Acidobacteriaceae
RicNunsandstonMG_3_bin.63	RicNunsandstonMG_3_bin.63.fa	TRUE	RicNunsandstonMG_3_bin.63	90.23	1.85	3067001	15015	d__Bacteria;p__UBP12;c__UBA5184;o__UBA5184;f__UBA5184;g__;s__	Bacteria;UBP12;UBA5184;UBA5184;UBA5184;;	Bacteria	UBP12	UBA5184	UBA5184	UBA5184
RicNunsandstonMG_3_bin.67	RicNunsandstonMG_3_bin.67.fa	TRUE	RicNunsandstonMG_3_bin.67	95.48	1.78	5543589	29180	d__Bacteria;p__Cyanobacteriota;c__Cyanobacteriia;o__Cyanobacteriales;f__Chroococcidiopsidaceae;g__;s__	Bacteria;Cyanobacteriota;Cyanobacteriia;Cyanobacteriales;Chroococcidiopsidaceae;;	Bacteria	Cyanobacteriota	Cyanobacteriia	Cyanobacteriales	Chroococcidiopsidaceae
RicNunsandstonMG_3_bin.69	RicNunsandstonMG_3_bin.69.fa	FALSE	MtNewZealnordMG_2_bin.25	95.02	2.72	4219833	26088	d__Bacteria;p__Proteobacteria;c__Alphaproteobacteria;o__Acetobacterales;f__Acetobacteraceae;g__70-18;s__	Bacteria;Proteobacteria;Alphaproteobacteria;Acetobacterales;Acetobacteraceae;70-18;	Bacteria	Proteobacteria	Alphaproteobacteria	Acetobacterales	Acetobacteraceae	70-18
RicNunsandstonMG_3_bin.7	RicNunsandstonMG_3_bin.7.fa	TRUE	RicNunsandstonMG_3_bin.7	70.34	2.56	4218963	10630	d__Bacteria;p__Cyanobacteriota;c__Cyanobacteriia;o__Cyanobacteriales;f__Chroococcidiopsidaceae;g__;s__	Bacteria;Cyanobacteriota;Cyanobacteriia;Cyanobacteriales;Chroococcidiopsidaceae;;	Bacteria	Cyanobacteriota	Cyanobacteriia	Cyanobacteriales	Chroococcidiopsidaceae
RicNunsandstonMG_3_bin.70	RicNunsandstonMG_3_bin.70.fa	TRUE	RicNunsandstonMG_3_bin.70	89.66	4.31	3586442	45814	d__Bacteria;p__Acidobacteriota;c__Acidobacteriae;o__Acidobacteriales;f__Acidobacteriaceae;g__;s__	Bacteria;Acidobacteriota;Acidobacteriae;Acidobacteriales;Acidobacteriaceae;;	Bacteria	Acidobacteriota	Acidobacteriae	Acidobacteriales	Acidobacteriaceae
RicNunsandstonMG_3_bin.74	RicNunsandstonMG_3_bin.74.fa	TRUE	RicNunsandstonMG_3_bin.74	98.13	1.24	3884097	23959	d__Bacteria;p__Proteobacteria;c__Alphaproteobacteria;o__Acetobacterales;f__Acetobacteraceae;g__;s__	Bacteria;Proteobacteria;Alphaproteobacteria;Acetobacterales;Acetobacteraceae;;	Bacteria	Proteobacteria	Alphaproteobacteria	Acetobacterales	Acetobacteraceae
RicNunsandstonMG_3_bin.76	RicNunsandstonMG_3_bin.76.fa	FALSE	UniValsudMG_2_bin.107	90.74	0.93	2691632	28154	d__Bacteria;p__UBP12;c__UBA5184;o__UBA5184;f__UBA5184;g__;s__	Bacteria;UBP12;UBA5184;UBA5184;UBA5184;;	Bacteria	UBP12	UBA5184	UBA5184	UBA5184
RicNunsandstonMG_3_bin.78	RicNunsandstonMG_3_bin.78.fa	TRUE	RicNunsandstonMG_3_bin.78	94.87	2.59	6466793	21555	d__Bacteria;p__Proteobacteria;c__Alphaproteobacteria;o__Acetobacterales;f__Acetobacteraceae;g__70-18;s__	Bacteria;Proteobacteria;Alphaproteobacteria;Acetobacterales;Acetobacteraceae;70-18;	Bacteria	Proteobacteria	Alphaproteobacteria	Acetobacterales	Acetobacteraceae	70-18
RicNunsandstonMG_3_bin.79	RicNunsandstonMG_3_bin.79.fa	FALSE	LinTernordMG_2_bin.2	64.29	2.75	2644616	7075	d__Bacteria;p__Actinobacteriota;c__Actinobacteria;o__Frankiales;f__Frankiaceae;g__;s__	Bacteria;Actinobacteriota;Actinobacteria;Frankiales;Frankiaceae;;	Bacteria	Actinobacteriota	Actinobacteria	Frankiales	Frankiaceae
RicNunsandstonMG_3_bin.82	RicNunsandstonMG_3_bin.82.fa	FALSE	RicNunsandstonMG_4_bin.86	82.22	3.09	2742467	8355	d__Bacteria;p__Actinobacteriota;c__Thermoleophilia;o__Solirubrobacterales;f__Solirubrobacteraceae;g__;s__	Bacteria;Actinobacteriota;Thermoleophilia;Solirubrobacterales;Solirubrobacteraceae;;	Bacteria	Actinobacteriota	Thermoleophilia	Solirubrobacterales	Solirubrobacteraceae
RicNunsandstonMG_3_bin.84	RicNunsandstonMG_3_bin.84.fa	FALSE	RicNunsandstonMG_4_bin.75	54.63	1.28	1295218	4477	d__Bacteria;p__Actinobacteriota;c__Thermoleophilia;o__Solirubrobacterales;f__Solirubrobacteraceae;g__;s__	Bacteria;Actinobacteriota;Thermoleophilia;Solirubrobacterales;Solirubrobacteraceae;;	Bacteria	Actinobacteriota	Thermoleophilia	Solirubrobacterales	Solirubrobacteraceae
RicNunsandstonMG_3_bin.85	RicNunsandstonMG_3_bin.85.fa	TRUE	RicNunsandstonMG_3_bin.85	97.19	5.94	5536946	96144	d__Bacteria;p__Chloroflexota;c__Ktedonobacteria;o__Ktedonobacterales;f__Ktedonobacteraceae;g__UBA7999;s__	Bacteria;Chloroflexota;Ktedonobacteria;Ktedonobacterales;Ktedonobacteraceae;UBA7999;	Bacteria	Chloroflexota	Ktedonobacteria	Ktedonobacterales	Ktedonobacteraceae	UBA7999
RicNunsandstonMG_3_bin.86	RicNunsandstonMG_3_bin.86.fa	TRUE	RicNunsandstonMG_3_bin.86	96.3	0	3497644	136676	d__Bacteria;p__UBP12;c__UBA5184;o__UBA5184;f__UBA5184;g__;s__	Bacteria;UBP12;UBA5184;UBA5184;UBA5184;;	Bacteria	UBP12	UBA5184	UBA5184	UBA5184
RicNunsandstonMG_3_bin.88	RicNunsandstonMG_3_bin.88.fa	TRUE	RicNunsandstonMG_3_bin.88	97.22	0.93	5581177	55061	d__Bacteria;p__Armatimonadota;c__Chthonomonadetes;o__;f__;g__;s__	Bacteria;Armatimonadota;Chthonomonadetes;;;;	Bacteria	Armatimonadota	Chthonomonadetes
RicNunsandstonMG_3_bin.89	RicNunsandstonMG_3_bin.89.fa	TRUE	RicNunsandstonMG_3_bin.89	97.42	0.53	4927165	65045	d__Bacteria;p__Actinobacteriota;c__Actinobacteria;o__Streptosporangiales;f__Streptosporangiaceae;g__UBA8262;s__	Bacteria;Actinobacteriota;Actinobacteria;Streptosporangiales;Streptosporangiaceae;UBA8262;	Bacteria	Actinobacteriota	Actinobacteria	Streptosporangiales	Streptosporangiaceae	UBA8262
RicNunsandstonMG_3_bin.90	RicNunsandstonMG_3_bin.90.fa	TRUE	RicNunsandstonMG_3_bin.90	97.62	0.71	3149446	124159	d__Bacteria;p__Bacteroidota;c__Bacteroidia;o__Sphingobacteriales;f__;g__;s__	Bacteria;Bacteroidota;Bacteroidia;Sphingobacteriales;;;	Bacteria	Bacteroidota	Bacteroidia	Sphingobacteriales
RicNunsandstonMG_3_bin.91	RicNunsandstonMG_3_bin.91.fa	TRUE	RicNunsandstonMG_3_bin.91	99.61	1.16	6400170	41243	d__Bacteria;p__Planctomycetota;c__Planctomycetes;o__Isosphaerales;f__Isosphaeraceae;g__;s__	Bacteria;Planctomycetota;Planctomycetes;Isosphaerales;Isosphaeraceae;;	Bacteria	Planctomycetota	Planctomycetes	Isosphaerales	Isosphaeraceae
RicNunsandstonMG_3_bin.93	RicNunsandstonMG_3_bin.93.fa	TRUE	RicNunsandstonMG_3_bin.93	97.44	2.99	5319949	19928	d__Bacteria;p__Actinobacteriota;c__Thermoleophilia;o__Solirubrobacterales;f__Solirubrobacteraceae;g__;s__	Bacteria;Actinobacteriota;Thermoleophilia;Solirubrobacterales;Solirubrobacteraceae;;	Bacteria	Actinobacteriota	Thermoleophilia	Solirubrobacterales	Solirubrobacteraceae
RicNunsandstonMG_3_bin.94	RicNunsandstonMG_3_bin.94.fa	TRUE	RicNunsandstonMG_3_bin.94	95.48	2.25	3736464	50225	d__Bacteria;p__Proteobacteria;c__Alphaproteobacteria;o__Acetobacterales;f__Acetobacteraceae;g__70-18;s__	Bacteria;Proteobacteria;Alphaproteobacteria;Acetobacterales;Acetobacteraceae;70-18;	Bacteria	Proteobacteria	Alphaproteobacteria	Acetobacterales	Acetobacteraceae	70-18
RicNunsandstonMG_3_bin.95	RicNunsandstonMG_3_bin.95.fa	TRUE	RicNunsandstonMG_3_bin.95	66.61	2.97	2740885	11376	d__Bacteria;p__Chloroflexota;c__Ktedonobacteria;o__Ktedonobacterales;f__Ktedonobacteraceae;g__UBA7999;s__	Bacteria;Chloroflexota;Ktedonobacteria;Ktedonobacterales;Ktedonobacteraceae;UBA7999;	Bacteria	Chloroflexota	Ktedonobacteria	Ktedonobacterales	Ktedonobacteraceae	UBA7999
RicNunsandstonMG_3_bin.99	RicNunsandstonMG_3_bin.99.fa	FALSE	FingerMtnordMG_2_bin.17	88.91	9.9	6504462	22739	d__Bacteria;p__Chloroflexota;c__Ktedonobacteria;o__Ktedonobacterales;f__Ktedonobacteraceae;g__UBA7999;s__	Bacteria;Chloroflexota;Ktedonobacteria;Ktedonobacterales;Ktedonobacteraceae;UBA7999;	Bacteria	Chloroflexota	Ktedonobacteria	Ktedonobacterales	Ktedonobacteraceae	UBA7999
RicNunsandstonMG_4_bin.12	RicNunsandstonMG_4_bin.12.fa	FALSE	UniValnordMG_2_bin.45	87.48	4.32	3741325	8894	d__Bacteria;p__Actinobacteriota;c__Actinobacteria;o__Actinomycetales;f__Dermatophilaceae;g__GCA-2748155;s__	Bacteria;Actinobacteriota;Actinobacteria;Actinomycetales;Dermatophilaceae;GCA-2748155;	Bacteria	Actinobacteriota	Actinobacteria	Actinomycetales	Dermatophilaceae	GCA-2748155
RicNunsandstonMG_4_bin.13	RicNunsandstonMG_4_bin.13.fa	FALSE	MtNewZealnordMG_2_bin.19	96.91	1.85	3659227	27997	d__Bacteria;p__UBP12;c__UBA5184;o__UBA5184;f__UBA5184;g__;s__	Bacteria;UBP12;UBA5184;UBA5184;UBA5184;;	Bacteria	UBP12	UBA5184	UBA5184	UBA5184
RicNunsandstonMG_4_bin.20	RicNunsandstonMG_4_bin.20.fa	FALSE	MtNewZealnordMG_2_bin.16	97.22	1.85	4326955	50283	d__Bacteria;p__Armatimonadota;c__Chthonomonadetes;o__;f__;g__;s__	Bacteria;Armatimonadota;Chthonomonadetes;;;;	Bacteria	Armatimonadota	Chthonomonadetes
RicNunsandstonMG_4_bin.23	RicNunsandstonMG_4_bin.23.fa	FALSE	RickerHillsnord_2_bin.30	55.95	3.74	2006239	4960	d__Bacteria;p__Actinobacteriota;c__Actinobacteria;o__Frankiales;f__;g__;s__	Bacteria;Actinobacteriota;Actinobacteria;Frankiales;;;	Bacteria	Actinobacteriota	Actinobacteria	Frankiales
RicNunsandstonMG_4_bin.26	RicNunsandstonMG_4_bin.26.fa	FALSE	MtNewZealnordMG_2_bin.10	95.94	5.13	5535920	19401	d__Bacteria;p__Actinobacteriota;c__Thermoleophilia;o__Solirubrobacterales;f__Solirubrobacteraceae;g__;s__	Bacteria;Actinobacteriota;Thermoleophilia;Solirubrobacterales;Solirubrobacteraceae;;	Bacteria	Actinobacteriota	Thermoleophilia	Solirubrobacterales	Solirubrobacteraceae
RicNunsandstonMG_4_bin.29	RicNunsandstonMG_4_bin.29.fa	FALSE	UniValsudMG_2_bin.19	95.88	0	3192627	60902	d__Bacteria;p__UBP12;c__UBA5184;o__UBA5184;f__UBA5184;g__;s__	Bacteria;UBP12;UBA5184;UBA5184;UBA5184;;	Bacteria	UBP12	UBA5184	UBA5184	UBA5184
RicNunsandstonMG_4_bin.3	RicNunsandstonMG_4_bin.3.fa	FALSE	PudButsudMG_2_bin.62	96.4	2.19	5011146	23746	d__Bacteria;p__Actinobacteriota;c__Actinobacteria;o__Corynebacteriales;f__Nakamurellaceae;g__Nakamurella;s__	Bacteria;Actinobacteriota;Actinobacteria;Corynebacteriales;Nakamurellaceae;Nakamurella;	Bacteria	Actinobacteriota	Actinobacteria	Corynebacteriales	Nakamurellaceae	Nakamurella
RicNunsandstonMG_4_bin.30	RicNunsandstonMG_4_bin.30.fa	FALSE	MtNewZealnordMG_2_bin.1	70.09	0.78	1934378	5317	d__Bacteria;p__Actinobacteriota;c__Thermoleophilia;o__Solirubrobacterales;f__Solirubrobacteraceae;g__;s__	Bacteria;Actinobacteriota;Thermoleophilia;Solirubrobacterales;Solirubrobacteraceae;;	Bacteria	Actinobacteriota	Thermoleophilia	Solirubrobacterales	Solirubrobacteraceae
RicNunsandstonMG_4_bin.32	RicNunsandstonMG_4_bin.32.fa	FALSE	RicNunsandstonMG_3_bin.85	93.23	6.03	5593594	60901	d__Bacteria;p__Chloroflexota;c__Ktedonobacteria;o__Ktedonobacterales;f__Ktedonobacteraceae;g__UBA7999;s__	Bacteria;Chloroflexota;Ktedonobacteria;Ktedonobacterales;Ktedonobacteraceae;UBA7999;	Bacteria	Chloroflexota	Ktedonobacteria	Ktedonobacterales	Ktedonobacteraceae	UBA7999
RicNunsandstonMG_4_bin.33	RicNunsandstonMG_4_bin.33.fa	TRUE	RicNunsandstonMG_4_bin.33	98.11	2.83	5095263	24133	d__Bacteria;p__Chloroflexota;c__Chloroflexia;o__;f__;g__;s__	Bacteria;Chloroflexota;Chloroflexia;;;;	Bacteria	Chloroflexota	Chloroflexia
RicNunsandstonMG_4_bin.37	RicNunsandstonMG_4_bin.37.fa	FALSE	RickerHillsnord_2_bin.48	97.21	1	3976060	51251	d__Bacteria;p__Proteobacteria;c__Alphaproteobacteria;o__Acetobacterales;f__Acetobacteraceae;g__70-18;s__	Bacteria;Proteobacteria;Alphaproteobacteria;Acetobacterales;Acetobacteraceae;70-18;	Bacteria	Proteobacteria	Alphaproteobacteria	Acetobacterales	Acetobacteraceae	70-18
RicNunsandstonMG_4_bin.42	RicNunsandstonMG_4_bin.42.fa	FALSE	RicNunsandstonMG_3_bin.88	95.37	0.93	5402726	70288	d__Bacteria;p__Armatimonadota;c__Chthonomonadetes;o__;f__;g__;s__	Bacteria;Armatimonadota;Chthonomonadetes;;;;	Bacteria	Armatimonadota	Chthonomonadetes
RicNunsandstonMG_4_bin.46	RicNunsandstonMG_4_bin.46.fa	FALSE	ButProsudMG_2_bin.21	57.2	1.38	1439932	5268	d__Bacteria;p__Actinobacteriota;c__Actinobacteria;o__Corynebacteriales;f__Corynebacteriaceae;g__;s__	Bacteria;Actinobacteriota;Actinobacteria;Corynebacteriales;Corynebacteriaceae;;	Bacteria	Actinobacteriota	Actinobacteria	Corynebacteriales	Corynebacteriaceae
RicNunsandstonMG_4_bin.47	RicNunsandstonMG_4_bin.47.fa	FALSE	UniValnordMG_2_bin.36	99.28	1.35	3382500	124724	d__Bacteria;p__Actinobacteriota;c__Actinobacteria;o__Jiangellales;f__;g__;s__	Bacteria;Actinobacteriota;Actinobacteria;Jiangellales;;;	Bacteria	Actinobacteriota	Actinobacteria	Jiangellales
RicNunsandstonMG_4_bin.56	RicNunsandstonMG_4_bin.56.fa	FALSE	MtNewZealnordMG_2_bin.105	90.17	0	3515908	50476	d__Bacteria;p__UBP12;c__UBA5184;o__UBA5184;f__UBA5184;g__;s__	Bacteria;UBP12;UBA5184;UBA5184;UBA5184;;	Bacteria	UBP12	UBA5184	UBA5184	UBA5184
RicNunsandstonMG_4_bin.58	RicNunsandstonMG_4_bin.58.fa	TRUE	RicNunsandstonMG_4_bin.58	97.86	0.85	4353186	40305	d__Bacteria;p__Actinobacteriota;c__Thermoleophilia;o__Solirubrobacterales;f__Solirubrobacteraceae;g__;s__	Bacteria;Actinobacteriota;Thermoleophilia;Solirubrobacterales;Solirubrobacteraceae;;	Bacteria	Actinobacteriota	Thermoleophilia	Solirubrobacterales	Solirubrobacteraceae
RicNunsandstonMG_4_bin.6	RicNunsandstonMG_4_bin.6.fa	FALSE	MtNewZealnordMG_2_bin.9	83.9	0.52	1821545	8867	d__Bacteria;p__Actinobacteriota;c__Acidimicrobiia;o__Acidimicrobiales;f__UBA7543;g__;s__	Bacteria;Actinobacteriota;Acidimicrobiia;Acidimicrobiales;UBA7543;;	Bacteria	Actinobacteriota	Acidimicrobiia	Acidimicrobiales	UBA7543
RicNunsandstonMG_4_bin.62	RicNunsandstonMG_4_bin.62.fa	FALSE	BatPronordMG_2_bin.42	94.72	1.98	4259635	40894	d__Bacteria;p__Chloroflexota;c__UBA5177;o__UBA5177;f__UBA5177;g__;s__	Bacteria;Chloroflexota;UBA5177;UBA5177;UBA5177;;	Bacteria	Chloroflexota	UBA5177	UBA5177	UBA5177
RicNunsandstonMG_4_bin.63	RicNunsandstonMG_4_bin.63.fa	TRUE	RicNunsandstonMG_4_bin.63	73.97	0	2986875	10848	d__Bacteria;p__Armatimonadota;c__Chthonomonadetes;o__;f__;g__;s__	Bacteria;Armatimonadota;Chthonomonadetes;;;;	Bacteria	Armatimonadota	Chthonomonadetes
RicNunsandstonMG_4_bin.66	RicNunsandstonMG_4_bin.66.fa	FALSE	FingerMtsudMG_2_bin.3	68.38	0	2443247	671739	d__Bacteria;p__Acidobacteriota;c__Acidobacteriae;o__Acidobacteriales;f__Acidobacteriaceae;g__;s__	Bacteria;Acidobacteriota;Acidobacteriae;Acidobacteriales;Acidobacteriaceae;;	Bacteria	Acidobacteriota	Acidobacteriae	Acidobacteriales	Acidobacteriaceae
RicNunsandstonMG_4_bin.69	RicNunsandstonMG_4_bin.69.fa	FALSE	RickerHillsnord_2_bin.54	92.58	1.16	5407546	19726	d__Bacteria;p__Proteobacteria;c__Alphaproteobacteria;o__Acetobacterales;f__Acetobacteraceae;g__70-18;s__	Bacteria;Proteobacteria;Alphaproteobacteria;Acetobacterales;Acetobacteraceae;70-18;	Bacteria	Proteobacteria	Alphaproteobacteria	Acetobacterales	Acetobacteraceae	70-18
RicNunsandstonMG_4_bin.73	RicNunsandstonMG_4_bin.73.fa	FALSE	MtNewZealnordMG_2_bin.74	93.34	2.33	5905099	16658	d__Bacteria;p__Planctomycetota;c__Planctomycetes;o__Isosphaerales;f__Isosphaeraceae;g__;s__	Bacteria;Planctomycetota;Planctomycetes;Isosphaerales;Isosphaeraceae;;	Bacteria	Planctomycetota	Planctomycetes	Isosphaerales	Isosphaeraceae
RicNunsandstonMG_4_bin.74	RicNunsandstonMG_4_bin.74.fa	FALSE	MtNewZealnordMG_2_bin.7	95.71	1.98	4495618	54078	d__Bacteria;p__Chloroflexota;c__UBA5177;o__UBA5177;f__UBA5177;g__;s__	Bacteria;Chloroflexota;UBA5177;UBA5177;UBA5177;;	Bacteria	Chloroflexota	UBA5177	UBA5177	UBA5177
RicNunsandstonMG_4_bin.75	RicNunsandstonMG_4_bin.75.fa	TRUE	RicNunsandstonMG_4_bin.75	83.16	3.42	2520760	10699	d__Bacteria;p__Actinobacteriota;c__Thermoleophilia;o__Solirubrobacterales;f__Solirubrobacteraceae;g__;s__	Bacteria;Actinobacteriota;Thermoleophilia;Solirubrobacterales;Solirubrobacteraceae;;	Bacteria	Actinobacteriota	Thermoleophilia	Solirubrobacterales	Solirubrobacteraceae
RicNunsandstonMG_4_bin.83	RicNunsandstonMG_4_bin.83.fa	FALSE	SiePeanordMG_2_bin.44	83.82	0.78	2204717	93154	d__Bacteria;p__Actinobacteriota;c__Actinobacteria;o__Frankiales;f__Frankiaceae;g__;s__	Bacteria;Actinobacteriota;Actinobacteria;Frankiales;Frankiaceae;;	Bacteria	Actinobacteriota	Actinobacteria	Frankiales	Frankiaceae
RicNunsandstonMG_4_bin.85	RicNunsandstonMG_4_bin.85.fa	FALSE	UniValsudMG_2_bin.107	95.06	0.93	3192957	153455	d__Bacteria;p__UBP12;c__UBA5184;o__UBA5184;f__UBA5184;g__;s__	Bacteria;UBP12;UBA5184;UBA5184;UBA5184;;	Bacteria	UBP12	UBA5184	UBA5184	UBA5184
RicNunsandstonMG_4_bin.86	RicNunsandstonMG_4_bin.86.fa	TRUE	RicNunsandstonMG_4_bin.86	96.87	0.43	2712030	76969	d__Bacteria;p__Actinobacteriota;c__Thermoleophilia;o__Solirubrobacterales;f__Solirubrobacteraceae;g__;s__	Bacteria;Actinobacteriota;Thermoleophilia;Solirubrobacterales;Solirubrobacteraceae;;	Bacteria	Actinobacteriota	Thermoleophilia	Solirubrobacterales	Solirubrobacteraceae
RicNunsandstonMG_4_bin.87	RicNunsandstonMG_4_bin.87.fa	TRUE	RicNunsandstonMG_4_bin.87	97.51	0.5	3925654	81905	d__Bacteria;p__Proteobacteria;c__Alphaproteobacteria;o__Acetobacterales;f__Acetobacteraceae;g__70-18;s__	Bacteria;Proteobacteria;Alphaproteobacteria;Acetobacterales;Acetobacteraceae;70-18;	Bacteria	Proteobacteria	Alphaproteobacteria	Acetobacterales	Acetobacteraceae	70-18
RicNunsandstonMG_4_bin.94	RicNunsandstonMG_4_bin.94.fa	TRUE	RicNunsandstonMG_4_bin.94	96.54	0.69	7672941	14336	d__Bacteria;p__Chloroflexota;c__Chloroflexia;o__;f__;g__;s__	Bacteria;Chloroflexota;Chloroflexia;;;;	Bacteria	Chloroflexota	Chloroflexia
SiePeanordMG_2_bin.10	SiePeanordMG_2_bin.10.fa	FALSE	UniValnordMG_2_bin.36	82.07	3.69	2828122	7635	d__Bacteria;p__Actinobacteriota;c__Actinobacteria;o__Propionibacteriales;f__;g__;s__	Bacteria;Actinobacteriota;Actinobacteria;Propionibacteriales;;;	Bacteria	Actinobacteriota	Actinobacteria	Propionibacteriales
SiePeanordMG_2_bin.12	SiePeanordMG_2_bin.12.fa	FALSE	RicNunsandstonMG_4_bin.94	92.77	0	6614265	25827	d__Bacteria;p__Chloroflexota;c__Chloroflexia;o__;f__;g__;s__	Bacteria;Chloroflexota;Chloroflexia;;;;	Bacteria	Chloroflexota	Chloroflexia
SiePeanordMG_2_bin.15	SiePeanordMG_2_bin.15.fa	TRUE	SiePeanordMG_2_bin.15	98.01	0	6175993	29885	d__Bacteria;p__Proteobacteria;c__Alphaproteobacteria;o__Acetobacterales;f__Acetobacteraceae;g__70-18;s__	Bacteria;Proteobacteria;Alphaproteobacteria;Acetobacterales;Acetobacteraceae;70-18;	Bacteria	Proteobacteria	Alphaproteobacteria	Acetobacterales	Acetobacteraceae	70-18
SiePeanordMG_2_bin.16	SiePeanordMG_2_bin.16.fa	TRUE	SiePeanordMG_2_bin.16	96.58	4.27	4272109	72589	d__Bacteria;p__Acidobacteriota;c__Blastocatellia;o__Pyrinomonadales;f__Pyrinomonadaceae;g__;s__	Bacteria;Acidobacteriota;Blastocatellia;Pyrinomonadales;Pyrinomonadaceae;;	Bacteria	Acidobacteriota	Blastocatellia	Pyrinomonadales	Pyrinomonadaceae
SiePeanordMG_2_bin.2	SiePeanordMG_2_bin.2.fa	FALSE	LinTernordMG_2_bin.8	50	4.31	2927111	9364	d__Bacteria;p__Actinobacteriota;c__Actinobacteria;o__Actinomycetales;f__Dermatophilaceae;g__GCA-2748155;s__	Bacteria;Actinobacteriota;Actinobacteria;Actinomycetales;Dermatophilaceae;GCA-2748155;	Bacteria	Actinobacteriota	Actinobacteria	Actinomycetales	Dermatophilaceae	GCA-2748155
SiePeanordMG_2_bin.20	SiePeanordMG_2_bin.20.fa	FALSE	RickerHillsnord_2_bin.48	91.54	0.5	3825686	17701	d__Bacteria;p__Proteobacteria;c__Alphaproteobacteria;o__Acetobacterales;f__Acetobacteraceae;g__;s__	Bacteria;Proteobacteria;Alphaproteobacteria;Acetobacterales;Acetobacteraceae;;	Bacteria	Proteobacteria	Alphaproteobacteria	Acetobacterales	Acetobacteraceae
SiePeanordMG_2_bin.21	SiePeanordMG_2_bin.21.fa	TRUE	SiePeanordMG_2_bin.21	99.15	1.28	3584882	98355	d__Bacteria;p__Actinobacteriota;c__Acidimicrobiia;o__Microtrichales;f__UBA9382;g__;s__	Bacteria;Actinobacteriota;Acidimicrobiia;Microtrichales;UBA9382;;	Bacteria	Actinobacteriota	Acidimicrobiia	Microtrichales	UBA9382
SiePeanordMG_2_bin.24	SiePeanordMG_2_bin.24.fa	TRUE	SiePeanordMG_2_bin.24	94.44	0.31	4590238	131260	d__Bacteria;p__Armatimonadota;c__CG2-30-59-28;o__;f__;g__;s__	Bacteria;Armatimonadota;CG2-30-59-28;;;;	Bacteria	Armatimonadota	CG2-30-59-28
SiePeanordMG_2_bin.38	SiePeanordMG_2_bin.38.fa	TRUE	SiePeanordMG_2_bin.38	82.87	7.96	4359424	44747	d__Bacteria;p__Armatimonadota;c__CG2-30-59-28;o__;f__;g__;s__	Bacteria;Armatimonadota;CG2-30-59-28;;;;	Bacteria	Armatimonadota	CG2-30-59-28
SiePeanordMG_2_bin.41	SiePeanordMG_2_bin.41.fa	TRUE	SiePeanordMG_2_bin.41	93.44	2.19	4496820	96517	d__Bacteria;p__Actinobacteriota;c__Actinobacteria;o__Actinomycetales;f__Dermatophilaceae;g__UBA4719;s__	Bacteria;Actinobacteriota;Actinobacteria;Actinomycetales;Dermatophilaceae;UBA4719;	Bacteria	Actinobacteriota	Actinobacteria	Actinomycetales	Dermatophilaceae	UBA4719
SiePeanordMG_2_bin.44	SiePeanordMG_2_bin.44.fa	TRUE	SiePeanordMG_2_bin.44	89.64	1.09	3738388	39334	d__Bacteria;p__Actinobacteriota;c__Actinobacteria;o__Frankiales;f__Frankiaceae;g__;s__	Bacteria;Actinobacteriota;Actinobacteria;Frankiales;Frankiaceae;;	Bacteria	Actinobacteriota	Actinobacteria	Frankiales	Frankiaceae
SiePeanordMG_2_bin.5	SiePeanordMG_2_bin.5.fa	FALSE	ButProsudMG_2_bin.21	90.8	1.21	3162651	20284	d__Bacteria;p__Actinobacteriota;c__Actinobacteria;o__Corynebacteriales;f__Corynebacteriaceae;g__;s__	Bacteria;Actinobacteriota;Actinobacteria;Corynebacteriales;Corynebacteriaceae;;	Bacteria	Actinobacteriota	Actinobacteria	Corynebacteriales	Corynebacteriaceae
SiePeanordMG_2_bin.53	SiePeanordMG_2_bin.53.fa	TRUE	SiePeanordMG_2_bin.53	95.9	1.28	3963796	81553	d__Bacteria;p__Actinobacteriota;c__Actinobacteria;o__Frankiales;f__Frankiaceae;g__;s__	Bacteria;Actinobacteriota;Actinobacteria;Frankiales;Frankiaceae;;	Bacteria	Actinobacteriota	Actinobacteria	Frankiales	Frankiaceae
SiePeanordMG_2_bin.56	SiePeanordMG_2_bin.56.fa	TRUE	SiePeanordMG_2_bin.56	99.46	0	3878681	112524	d__Bacteria;p__Actinobacteriota;c__Actinobacteria;o__Actinomycetales;f__Dermatophilaceae;g__GCA-2748155;s__	Bacteria;Actinobacteriota;Actinobacteria;Actinomycetales;Dermatophilaceae;GCA-2748155;	Bacteria	Actinobacteriota	Actinobacteria	Actinomycetales	Dermatophilaceae	GCA-2748155
SiePeanordMG_2_bin.57	SiePeanordMG_2_bin.57.fa	FALSE	PudButsudMG_2_bin.44	97.22	1.85	5081387	136156	d__Bacteria;p__Armatimonadota;c__Chthonomonadetes;o__;f__;g__;s__	Bacteria;Armatimonadota;Chthonomonadetes;;;;	Bacteria	Armatimonadota	Chthonomonadetes
SiePeanordMG_2_bin.6	SiePeanordMG_2_bin.6.fa	FALSE	UniValnordMG_2_bin.45	85.89	1.94	2802444	10475	d__Bacteria;p__Actinobacteriota;c__Actinobacteria;o__Actinomycetales;f__Dermatophilaceae;g__GCA-2748155;s__	Bacteria;Actinobacteriota;Actinobacteria;Actinomycetales;Dermatophilaceae;GCA-2748155;	Bacteria	Actinobacteriota	Actinobacteria	Actinomycetales	Dermatophilaceae	GCA-2748155
SiePeanordMG_2_bin.60	SiePeanordMG_2_bin.60.fa	TRUE	SiePeanordMG_2_bin.60	98.84	1.62	4216848	72067	d__Bacteria;p__Actinobacteriota;c__Actinobacteria;o__Frankiales;f__Frankiaceae;g__;s__	Bacteria;Actinobacteriota;Actinobacteria;Frankiales;Frankiaceae;;	Bacteria	Actinobacteriota	Actinobacteria	Frankiales	Frankiaceae
SiePeanordMG_2_bin.61	SiePeanordMG_2_bin.61.fa	FALSE	PudButsudMG_2_bin.62	70.47	0.47	2527425	8155	d__Bacteria;p__Actinobacteriota;c__Actinobacteria;o__Corynebacteriales;f__Nakamurellaceae;g__Nakamurella;s__	Bacteria;Actinobacteriota;Actinobacteria;Corynebacteriales;Nakamurellaceae;Nakamurella;	Bacteria	Actinobacteriota	Actinobacteria	Corynebacteriales	Nakamurellaceae	Nakamurella
SiePeanordMG_2_bin.63	SiePeanordMG_2_bin.63.fa	FALSE	UniValsudMG_2_bin.26	96.67	0.24	4201095	77353	d__Bacteria;p__Bacteroidota;c__Bacteroidia;o__Sphingobacteriales;f__Sphingobacteriaceae;g__;s__	Bacteria;Bacteroidota;Bacteroidia;Sphingobacteriales;Sphingobacteriaceae;;	Bacteria	Bacteroidota	Bacteroidia	Sphingobacteriales	Sphingobacteriaceae
SiePeanordMG_2_bin.70	SiePeanordMG_2_bin.70.fa	TRUE	SiePeanordMG_2_bin.70	85.87	0.72	4062206	11003	d__Bacteria;p__Actinobacteriota;c__Actinobacteria;o__Actinomycetales;f__Dermatophilaceae;g__Branchiibius;s__	Bacteria;Actinobacteriota;Actinobacteria;Actinomycetales;Dermatophilaceae;Branchiibius;	Bacteria	Actinobacteriota	Actinobacteria	Actinomycetales	Dermatophilaceae	Branchiibius
SiePeanordMG_2_bin.71	SiePeanordMG_2_bin.71.fa	TRUE	SiePeanordMG_2_bin.71	60.03	8.78	2500596	9301	d__Bacteria;p__Armatimonadota;c__CG2-30-59-28;o__;f__;g__;s__	Bacteria;Armatimonadota;CG2-30-59-28;;;;	Bacteria	Armatimonadota	CG2-30-59-28
SiePeanordMG_2_bin.9	SiePeanordMG_2_bin.9.fa	TRUE	SiePeanordMG_2_bin.9	96.77	0.25	4972331	28174	d__Bacteria;p__Proteobacteria;c__Alphaproteobacteria;o__Acetobacterales;f__Acetobacteraceae;g__70-18;s__	Bacteria;Proteobacteria;Alphaproteobacteria;Acetobacterales;Acetobacteraceae;70-18;	Bacteria	Proteobacteria	Alphaproteobacteria	Acetobacterales	Acetobacteraceae	70-18
SiePeanordMG_2_bin.90	SiePeanordMG_2_bin.90.fa	FALSE	RickerHillsnord_2_bin.19	90.34	3.42	2565338	8883	d__Bacteria;p__Actinobacteriota;c__Thermoleophilia;o__Solirubrobacterales;f__Solirubrobacteraceae;g__;s__	Bacteria;Actinobacteriota;Thermoleophilia;Solirubrobacterales;Solirubrobacteraceae;;	Bacteria	Actinobacteriota	Thermoleophilia	Solirubrobacterales	Solirubrobacteraceae
SiePeasudMG_2_bin.1	SiePeasudMG_2_bin.1.fa	TRUE	SiePeasudMG_2_bin.1	88.78	0.78	3544616	39724	d__Bacteria;p__Actinobacteriota;c__Actinobacteria;o__Actinomycetales;f__GCA-002748415;g__;s__	Bacteria;Actinobacteriota;Actinobacteria;Actinomycetales;GCA-002748415;;	Bacteria	Actinobacteriota	Actinobacteria	Actinomycetales	GCA-002748415
SiePeasudMG_2_bin.102	SiePeasudMG_2_bin.102.fa	TRUE	SiePeasudMG_2_bin.102	99.15	6.41	3498681	109243	d__Bacteria;p__Actinobacteriota;c__Acidimicrobiia;o__Microtrichales;f__;g__;s__	Bacteria;Actinobacteriota;Acidimicrobiia;Microtrichales;;;	Bacteria	Actinobacteriota	Acidimicrobiia	Microtrichales
SiePeasudMG_2_bin.103	SiePeasudMG_2_bin.103.fa	TRUE	SiePeasudMG_2_bin.103	97.84	0	2875011	35601	d__Bacteria;p__Actinobacteriota;c__Thermoleophilia;o__Solirubrobacterales;f__Thermoleophilaceae;g__;s__	Bacteria;Actinobacteriota;Thermoleophilia;Solirubrobacterales;Thermoleophilaceae;;	Bacteria	Actinobacteriota	Thermoleophilia	Solirubrobacterales	Thermoleophilaceae
SiePeasudMG_2_bin.105	SiePeasudMG_2_bin.105.fa	TRUE	SiePeasudMG_2_bin.105	97.77	0	5392185	32910	d__Bacteria;p__Chloroflexota;c__Chloroflexia;o__Thermomicrobiales;f__UBA6265;g__;s__	Bacteria;Chloroflexota;Chloroflexia;Thermomicrobiales;UBA6265;;	Bacteria	Chloroflexota	Chloroflexia	Thermomicrobiales	UBA6265
SiePeasudMG_2_bin.106	SiePeasudMG_2_bin.106.fa	TRUE	SiePeasudMG_2_bin.106	83.44	1.6	3779099	10221	d__Bacteria;p__Actinobacteriota;c__Actinobacteria;o__Propionibacteriales;f__Propionibacteriaceae;g__Friedmanniella;s__	Bacteria;Actinobacteriota;Actinobacteria;Propionibacteriales;Propionibacteriaceae;Friedmanniella;	Bacteria	Actinobacteriota	Actinobacteria	Propionibacteriales	Propionibacteriaceae	Friedmanniella
SiePeasudMG_2_bin.107	SiePeasudMG_2_bin.107.fa	FALSE	LinTernordMG_2_bin.8	76.03	1.16	2327070	9232	d__Bacteria;p__Actinobacteriota;c__Actinobacteria;o__Actinomycetales;f__Dermatophilaceae;g__GCA-2748155;s__	Bacteria;Actinobacteriota;Actinobacteria;Actinomycetales;Dermatophilaceae;GCA-2748155;	Bacteria	Actinobacteriota	Actinobacteria	Actinomycetales	Dermatophilaceae	GCA-2748155
SiePeasudMG_2_bin.11	SiePeasudMG_2_bin.11.fa	TRUE	SiePeasudMG_2_bin.11	55.53	2.07	1838911	4747	d__Bacteria;p__Actinobacteriota;c__Actinobacteria;o__Propionibacteriales;f__Actinopolymorphaceae;g__;s__	Bacteria;Actinobacteriota;Actinobacteria;Propionibacteriales;Actinopolymorphaceae;;	Bacteria	Actinobacteriota	Actinobacteria	Propionibacteriales	Actinopolymorphaceae
SiePeasudMG_2_bin.112	SiePeasudMG_2_bin.112.fa	TRUE	SiePeasudMG_2_bin.112	93.52	3.27	4777173	84841	d__Bacteria;p__Armatimonadota;c__CG2-30-59-28;o__;f__;g__;s__	Bacteria;Armatimonadota;CG2-30-59-28;;;;	Bacteria	Armatimonadota	CG2-30-59-28
SiePeasudMG_2_bin.114	SiePeasudMG_2_bin.114.fa	TRUE	SiePeasudMG_2_bin.114	95.77	4.27	4149260	78315	d__Bacteria;p__Acidobacteriota;c__Blastocatellia;o__Pyrinomonadales;f__Pyrinomonadaceae;g__GCA-002050365;s__	Bacteria;Acidobacteriota;Blastocatellia;Pyrinomonadales;Pyrinomonadaceae;GCA-002050365;	Bacteria	Acidobacteriota	Blastocatellia	Pyrinomonadales	Pyrinomonadaceae	GCA-002050365
SiePeasudMG_2_bin.118	SiePeasudMG_2_bin.118.fa	TRUE	SiePeasudMG_2_bin.118	95.51	1.93	3877420	31438	d__Bacteria;p__Actinobacteriota;c__Actinobacteria;o__Propionibacteriales;f__Propionibacteriaceae;g__Friedmanniella;s__	Bacteria;Actinobacteriota;Actinobacteria;Propionibacteriales;Propionibacteriaceae;Friedmanniella;	Bacteria	Actinobacteriota	Actinobacteria	Propionibacteriales	Propionibacteriaceae	Friedmanniella
SiePeasudMG_2_bin.119	SiePeasudMG_2_bin.119.fa	FALSE	PudButnordMG_2_bin.36	70.69	0	4610060	17726	d__Bacteria;p__Bacteroidota;c__Bacteroidia;o__Cytophagales;f__Hymenobacteraceae;g__Hymenobacter;s__	Bacteria;Bacteroidota;Bacteroidia;Cytophagales;Hymenobacteraceae;Hymenobacter;	Bacteria	Bacteroidota	Bacteroidia	Cytophagales	Hymenobacteraceae	Hymenobacter
SiePeasudMG_2_bin.12	SiePeasudMG_2_bin.12.fa	TRUE	SiePeasudMG_2_bin.12	88.43	0	4035208	26485	d__Bacteria;p__Armatimonadota;c__CG2-30-59-28;o__;f__;g__;s__	Bacteria;Armatimonadota;CG2-30-59-28;;;;	Bacteria	Armatimonadota	CG2-30-59-28
SiePeasudMG_2_bin.120	SiePeasudMG_2_bin.120.fa	FALSE	RickerHillsnord_2_bin.17	91.88	1.4	2831218	17923	d__Bacteria;p__Actinobacteriota;c__Thermoleophilia;o__Solirubrobacterales;f__Solirubrobacteraceae;g__;s__	Bacteria;Actinobacteriota;Thermoleophilia;Solirubrobacterales;Solirubrobacteraceae;;	Bacteria	Actinobacteriota	Thermoleophilia	Solirubrobacterales	Solirubrobacteraceae
SiePeasudMG_2_bin.121	SiePeasudMG_2_bin.121.fa	TRUE	SiePeasudMG_2_bin.121	97.04	0.49	5005116	35092	d__Bacteria;p__Bacteroidota;c__Bacteroidia;o__Chitinophagales;f__Chitinophagaceae;g__Segetibacter;s__	Bacteria;Bacteroidota;Bacteroidia;Chitinophagales;Chitinophagaceae;Segetibacter;	Bacteria	Bacteroidota	Bacteroidia	Chitinophagales	Chitinophagaceae	Segetibacter
SiePeasudMG_2_bin.16	SiePeasudMG_2_bin.16.fa	TRUE	SiePeasudMG_2_bin.16	91.51	2.29	3086659	12822	d__Bacteria;p__Actinobacteriota;c__Actinobacteria;o__Actinomycetales;f__Micrococcaceae;g__Arthrobacter_D;s__	Bacteria;Actinobacteriota;Actinobacteria;Actinomycetales;Micrococcaceae;Arthrobacter_D;	Bacteria	Actinobacteriota	Actinobacteria	Actinomycetales	Micrococcaceae	Arthrobacter_D
SiePeasudMG_2_bin.2	SiePeasudMG_2_bin.2.fa	TRUE	SiePeasudMG_2_bin.2	94.05	0.72	2994940	425878	d__Bacteria;p__Actinobacteriota;c__Actinobacteria;o__Frankiales;f__Frankiaceae;g__;s__	Bacteria;Actinobacteriota;Actinobacteria;Frankiales;Frankiaceae;;	Bacteria	Actinobacteriota	Actinobacteria	Frankiales	Frankiaceae
SiePeasudMG_2_bin.22	SiePeasudMG_2_bin.22.fa	TRUE	SiePeasudMG_2_bin.22	98.52	0.74	6315077	71203	d__Bacteria;p__Bacteroidota;c__Bacteroidia;o__Chitinophagales;f__Chitinophagaceae;g__;s__	Bacteria;Bacteroidota;Bacteroidia;Chitinophagales;Chitinophagaceae;;	Bacteria	Bacteroidota	Bacteroidia	Chitinophagales	Chitinophagaceae
SiePeasudMG_2_bin.25	SiePeasudMG_2_bin.25.fa	TRUE	SiePeasudMG_2_bin.25	86.26	2.05	2808682	19459	d__Bacteria;p__Actinobacteriota;c__Rubrobacteria;o__Rubrobacterales;f__Rubrobacteraceae;g__Rubrobacter_A;s__	Bacteria;Actinobacteriota;Rubrobacteria;Rubrobacterales;Rubrobacteraceae;Rubrobacter_A;	Bacteria	Actinobacteriota	Rubrobacteria	Rubrobacterales	Rubrobacteraceae	Rubrobacter_A
SiePeasudMG_2_bin.29	SiePeasudMG_2_bin.29.fa	TRUE	SiePeasudMG_2_bin.29	95.73	4.32	3705937	66609	d__Bacteria;p__Acidobacteriota;c__Blastocatellia;o__Pyrinomonadales;f__Pyrinomonadaceae;g__GCA-002050365;s__	Bacteria;Acidobacteriota;Blastocatellia;Pyrinomonadales;Pyrinomonadaceae;GCA-002050365;	Bacteria	Acidobacteriota	Blastocatellia	Pyrinomonadales	Pyrinomonadaceae	GCA-002050365
SiePeasudMG_2_bin.3	SiePeasudMG_2_bin.3.fa	TRUE	SiePeasudMG_2_bin.3	78.77	0.78	3168940	7886	d__Bacteria;p__Actinobacteriota;c__Actinobacteria;o__Propionibacteriales;f__Propionibacteriaceae;g__Friedmanniella;s__	Bacteria;Actinobacteriota;Actinobacteria;Propionibacteriales;Propionibacteriaceae;Friedmanniella;	Bacteria	Actinobacteriota	Actinobacteria	Propionibacteriales	Propionibacteriaceae	Friedmanniella
SiePeasudMG_2_bin.31	SiePeasudMG_2_bin.31.fa	TRUE	SiePeasudMG_2_bin.31	57.76	1.72	2968237	5442	d__Bacteria;p__Actinobacteriota;c__Actinobacteria;o__Frankiales;f__;g__;s__	Bacteria;Actinobacteriota;Actinobacteria;Frankiales;;;	Bacteria	Actinobacteriota	Actinobacteria	Frankiales
SiePeasudMG_2_bin.35	SiePeasudMG_2_bin.35.fa	TRUE	SiePeasudMG_2_bin.35	92.67	1.84	4060583	8962	d__Bacteria;p__Proteobacteria;c__Alphaproteobacteria;o__Acetobacterales;f__Acetobacteraceae;g__Belnapia;s__	Bacteria;Proteobacteria;Alphaproteobacteria;Acetobacterales;Acetobacteraceae;Belnapia;	Bacteria	Proteobacteria	Alphaproteobacteria	Acetobacterales	Acetobacteraceae	Belnapia
SiePeasudMG_2_bin.36	SiePeasudMG_2_bin.36.fa	TRUE	SiePeasudMG_2_bin.36	97.29	1.48	5449252	52079	d__Bacteria;p__Bacteroidota;c__Bacteroidia;o__Chitinophagales;f__Chitinophagaceae;g__Segetibacter;s__	Bacteria;Bacteroidota;Bacteroidia;Chitinophagales;Chitinophagaceae;Segetibacter;	Bacteria	Bacteroidota	Bacteroidia	Chitinophagales	Chitinophagaceae	Segetibacter
SiePeasudMG_2_bin.38	SiePeasudMG_2_bin.38.fa	TRUE	SiePeasudMG_2_bin.38	88.38	0.18	3056127	20052	d__Bacteria;p__Actinobacteriota;c__Actinobacteria;o__Actinomycetales;f__Dermatophilaceae;g__;s__	Bacteria;Actinobacteriota;Actinobacteria;Actinomycetales;Dermatophilaceae;;	Bacteria	Actinobacteriota	Actinobacteria	Actinomycetales	Dermatophilaceae
SiePeasudMG_2_bin.40	SiePeasudMG_2_bin.40.fa	TRUE	SiePeasudMG_2_bin.40	97.48	0.94	8098720	32075	d__Bacteria;p__Chloroflexota;c__Chloroflexia;o__;f__;g__;s__	Bacteria;Chloroflexota;Chloroflexia;;;;	Bacteria	Chloroflexota	Chloroflexia
SiePeasudMG_2_bin.41	SiePeasudMG_2_bin.41.fa	TRUE	SiePeasudMG_2_bin.41	91.54	1.62	3538045	43885	d__Bacteria;p__Deinococcota;c__Deinococci;o__Deinococcales;f__Trueperaceae;g__Truepera_A;s__	Bacteria;Deinococcota;Deinococci;Deinococcales;Trueperaceae;Truepera_A;	Bacteria	Deinococcota	Deinococci	Deinococcales	Trueperaceae	Truepera_A
SiePeasudMG_2_bin.44	SiePeasudMG_2_bin.44.fa	TRUE	SiePeasudMG_2_bin.44	96.58	2.56	3596202	79227	d__Bacteria;p__Actinobacteriota;c__Acidimicrobiia;o__Microtrichales;f__;g__;s__	Bacteria;Actinobacteriota;Acidimicrobiia;Microtrichales;;;	Bacteria	Actinobacteriota	Acidimicrobiia	Microtrichales
SiePeasudMG_2_bin.47	SiePeasudMG_2_bin.47.fa	TRUE	SiePeasudMG_2_bin.47	98.43	0.38	4424852	69263	d__Bacteria;p__Chloroflexota;c__Chloroflexia;o__Thermomicrobiales;f__UBA6265;g__;s__	Bacteria;Chloroflexota;Chloroflexia;Thermomicrobiales;UBA6265;;	Bacteria	Chloroflexota	Chloroflexia	Thermomicrobiales	UBA6265
SiePeasudMG_2_bin.50	SiePeasudMG_2_bin.50.fa	TRUE	SiePeasudMG_2_bin.50	98.68	0.47	5112218	110523	d__Bacteria;p__Proteobacteria;c__Alphaproteobacteria;o__Rhizobiales;f__Beijerinckiaceae;g__;s__	Bacteria;Proteobacteria;Alphaproteobacteria;Rhizobiales;Beijerinckiaceae;;	Bacteria	Proteobacteria	Alphaproteobacteria	Rhizobiales	Beijerinckiaceae
SiePeasudMG_2_bin.51	SiePeasudMG_2_bin.51.fa	TRUE	SiePeasudMG_2_bin.51	95.41	0.81	4239310	185577	d__Bacteria;p__Actinobacteriota;c__Actinobacteria;o__Actinomycetales;f__GCA-002748415;g__;s__	Bacteria;Actinobacteriota;Actinobacteria;Actinomycetales;GCA-002748415;;	Bacteria	Actinobacteriota	Actinobacteria	Actinomycetales	GCA-002748415
SiePeasudMG_2_bin.52	SiePeasudMG_2_bin.52.fa	TRUE	SiePeasudMG_2_bin.52	97.8	0	4016357	167968	d__Bacteria;p__Chloroflexota;c__Chloroflexia;o__Thermomicrobiales;f__UBA6265;g__;s__	Bacteria;Chloroflexota;Chloroflexia;Thermomicrobiales;UBA6265;;	Bacteria	Chloroflexota	Chloroflexia	Thermomicrobiales	UBA6265
SiePeasudMG_2_bin.54	SiePeasudMG_2_bin.54.fa	FALSE	SiePeanordMG_2_bin.9	88.89	0.75	5435308	9786	d__Bacteria;p__Proteobacteria;c__Alphaproteobacteria;o__Acetobacterales;f__Acetobacteraceae;g__70-18;s__	Bacteria;Proteobacteria;Alphaproteobacteria;Acetobacterales;Acetobacteraceae;70-18;	Bacteria	Proteobacteria	Alphaproteobacteria	Acetobacterales	Acetobacteraceae	70-18
SiePeasudMG_2_bin.55	SiePeasudMG_2_bin.55.fa	TRUE	SiePeasudMG_2_bin.55	91	0.22	3448137	46092	d__Bacteria;p__Cyanobacteriota;c__Cyanobacteriia;o__Cyanobacteriales;f__Chroococcidiopsidaceae;g__Aliterella;s__	Bacteria;Cyanobacteriota;Cyanobacteriia;Cyanobacteriales;Chroococcidiopsidaceae;Aliterella;	Bacteria	Cyanobacteriota	Cyanobacteriia	Cyanobacteriales	Chroococcidiopsidaceae	Aliterella
SiePeasudMG_2_bin.56	SiePeasudMG_2_bin.56.fa	TRUE	SiePeasudMG_2_bin.56	93.4	0	4703127	82895	d__Bacteria;p__Chloroflexota;c__Chloroflexia;o__Thermomicrobiales;f__UBA6265;g__;s__	Bacteria;Chloroflexota;Chloroflexia;Thermomicrobiales;UBA6265;;	Bacteria	Chloroflexota	Chloroflexia	Thermomicrobiales	UBA6265
SiePeasudMG_2_bin.58	SiePeasudMG_2_bin.58.fa	TRUE	SiePeasudMG_2_bin.58	86.59	3.88	2549593	8784	d__Bacteria;p__Actinobacteriota;c__Thermoleophilia;o__Solirubrobacterales;f__70-9;g__;s__	Bacteria;Actinobacteriota;Thermoleophilia;Solirubrobacterales;70-9;;	Bacteria	Actinobacteriota	Thermoleophilia	Solirubrobacterales	70-9
SiePeasudMG_2_bin.59	SiePeasudMG_2_bin.59.fa	TRUE	SiePeasudMG_2_bin.59	99.15	0.85	2955955	696224	d__Bacteria;p__Actinobacteriota;c__Thermoleophilia;o__Solirubrobacterales;f__Solirubrobacteraceae;g__;s__	Bacteria;Actinobacteriota;Thermoleophilia;Solirubrobacterales;Solirubrobacteraceae;;	Bacteria	Actinobacteriota	Thermoleophilia	Solirubrobacterales	Solirubrobacteraceae
SiePeasudMG_2_bin.60	SiePeasudMG_2_bin.60.fa	FALSE	TrioNunataknord_2_bin.28	94.17	0.94	4811278	155671	d__Bacteria;p__Chloroflexota;c__Chloroflexia;o__Thermomicrobiales;f__UBA6265;g__;s__	Bacteria;Chloroflexota;Chloroflexia;Thermomicrobiales;UBA6265;;	Bacteria	Chloroflexota	Chloroflexia	Thermomicrobiales	UBA6265
SiePeasudMG_2_bin.62	SiePeasudMG_2_bin.62.fa	TRUE	SiePeasudMG_2_bin.62	82.02	2.23	6243661	10708	d__Bacteria;p__Chloroflexota;c__Chloroflexia;o__;f__;g__;s__	Bacteria;Chloroflexota;Chloroflexia;;;;	Bacteria	Chloroflexota	Chloroflexia
SiePeasudMG_2_bin.63	SiePeasudMG_2_bin.63.fa	TRUE	SiePeasudMG_2_bin.63	74.94	0.94	2631676	6770	d__Bacteria;p__Actinobacteriota;c__Actinobacteria;o__Corynebacteriales;f__Nakamurellaceae;g__Nakamurella_A;s__	Bacteria;Actinobacteriota;Actinobacteria;Corynebacteriales;Nakamurellaceae;Nakamurella_A;	Bacteria	Actinobacteriota	Actinobacteria	Corynebacteriales	Nakamurellaceae	Nakamurella_A
SiePeasudMG_2_bin.64	SiePeasudMG_2_bin.64.fa	TRUE	SiePeasudMG_2_bin.64	98.27	1.04	3323017	90683	d__Bacteria;p__Actinobacteriota;c__Actinobacteria;o__Propionibacteriales;f__Nocardioidaceae;g__;s__	Bacteria;Actinobacteriota;Actinobacteria;Propionibacteriales;Nocardioidaceae;;	Bacteria	Actinobacteriota	Actinobacteria	Propionibacteriales	Nocardioidaceae
SiePeasudMG_2_bin.65	SiePeasudMG_2_bin.65.fa	TRUE	SiePeasudMG_2_bin.65	80.48	3.42	3123558	14486	d__Bacteria;p__Actinobacteriota;c__Thermoleophilia;o__Solirubrobacterales;f__Solirubrobacteraceae;g__;s__	Bacteria;Actinobacteriota;Thermoleophilia;Solirubrobacterales;Solirubrobacteraceae;;	Bacteria	Actinobacteriota	Thermoleophilia	Solirubrobacterales	Solirubrobacteraceae
SiePeasudMG_2_bin.67	SiePeasudMG_2_bin.67.fa	TRUE	SiePeasudMG_2_bin.67	99.69	0.94	5136276	31920	d__Bacteria;p__Chloroflexota;c__Chloroflexia;o__;f__;g__;s__	Bacteria;Chloroflexota;Chloroflexia;;;;	Bacteria	Chloroflexota	Chloroflexia
SiePeasudMG_2_bin.68	SiePeasudMG_2_bin.68.fa	TRUE	SiePeasudMG_2_bin.68	98.11	0.8	3728716	179595	d__Bacteria;p__Actinobacteriota;c__Actinobacteria;o__Frankiales;f__Frankiaceae;g__;s__	Bacteria;Actinobacteriota;Actinobacteria;Frankiales;Frankiaceae;;	Bacteria	Actinobacteriota	Actinobacteria	Frankiales	Frankiaceae
SiePeasudMG_2_bin.69	SiePeasudMG_2_bin.69.fa	TRUE	SiePeasudMG_2_bin.69	57.54	0	4060621	5475	d__Bacteria;p__Planctomycetota;c__Planctomycetes;o__Isosphaerales;f__Isosphaeraceae;g__;s__	Bacteria;Planctomycetota;Planctomycetes;Isosphaerales;Isosphaeraceae;;	Bacteria	Planctomycetota	Planctomycetes	Isosphaerales	Isosphaeraceae
SiePeasudMG_2_bin.7	SiePeasudMG_2_bin.7.fa	TRUE	SiePeasudMG_2_bin.7	75.69	1.83	2336229	8401	d__Bacteria;p__Chloroflexota;c__Ellin6529;o__CSP1-4;f__CSP1-4;g__RBG-16-69-14;s__	Bacteria;Chloroflexota;Ellin6529;CSP1-4;CSP1-4;RBG-16-69-14;	Bacteria	Chloroflexota	Ellin6529	CSP1-4	CSP1-4	RBG-16-69-14
SiePeasudMG_2_bin.71	SiePeasudMG_2_bin.71.fa	TRUE	SiePeasudMG_2_bin.71	99.15	2.99	3797817	131964	d__Bacteria;p__Actinobacteriota;c__Acidimicrobiia;o__Microtrichales;f__;g__;s__	Bacteria;Actinobacteriota;Acidimicrobiia;Microtrichales;;;	Bacteria	Actinobacteriota	Acidimicrobiia	Microtrichales
SiePeasudMG_2_bin.73	SiePeasudMG_2_bin.73.fa	TRUE	SiePeasudMG_2_bin.73	98.43	2.83	7260048	34929	d__Bacteria;p__Chloroflexota;c__Chloroflexia;o__;f__;g__;s__	Bacteria;Chloroflexota;Chloroflexia;;;;	Bacteria	Chloroflexota	Chloroflexia
SiePeasudMG_2_bin.74	SiePeasudMG_2_bin.74.fa	TRUE	SiePeasudMG_2_bin.74	93.16	3.42	3367042	45555	d__Bacteria;p__Acidobacteriota;c__Blastocatellia;o__Pyrinomonadales;f__Pyrinomonadaceae;g__GCA-002050365;s__	Bacteria;Acidobacteriota;Blastocatellia;Pyrinomonadales;Pyrinomonadaceae;GCA-002050365;	Bacteria	Acidobacteriota	Blastocatellia	Pyrinomonadales	Pyrinomonadaceae	GCA-002050365
SiePeasudMG_2_bin.76	SiePeasudMG_2_bin.76.fa	TRUE	SiePeasudMG_2_bin.76	93.64	2.9	3607396	52923	d__Bacteria;p__Deinococcota;c__Deinococci;o__Deinococcales;f__Trueperaceae;g__Truepera_A;s__	Bacteria;Deinococcota;Deinococci;Deinococcales;Trueperaceae;Truepera_A;	Bacteria	Deinococcota	Deinococci	Deinococcales	Trueperaceae	Truepera_A
SiePeasudMG_2_bin.77	SiePeasudMG_2_bin.77.fa	TRUE	SiePeasudMG_2_bin.77	57.07	2.14	1209639	4441	d__Bacteria;p__Actinobacteriota;c__Acidimicrobiia;o__Microtrichales;f__;g__;s__	Bacteria;Actinobacteriota;Acidimicrobiia;Microtrichales;;;	Bacteria	Actinobacteriota	Acidimicrobiia	Microtrichales
SiePeasudMG_2_bin.79	SiePeasudMG_2_bin.79.fa	TRUE	SiePeasudMG_2_bin.79	99.04	0.33	3982189	68417	d__Bacteria;p__Cyanobacteriota;c__Cyanobacteriia;o__Cyanobacteriales;f__Chroococcidiopsidaceae;g__Aliterella;s__	Bacteria;Cyanobacteriota;Cyanobacteriia;Cyanobacteriales;Chroococcidiopsidaceae;Aliterella;	Bacteria	Cyanobacteriota	Cyanobacteriia	Cyanobacteriales	Chroococcidiopsidaceae	Aliterella
SiePeasudMG_2_bin.8	SiePeasudMG_2_bin.8.fa	TRUE	SiePeasudMG_2_bin.8	65.17	0	2477343	16347	d__Bacteria;p__Actinobacteriota;c__Actinobacteria;o__Actinomycetales;f__Micrococcaceae;g__Arthrobacter_D;s__	Bacteria;Actinobacteriota;Actinobacteria;Actinomycetales;Micrococcaceae;Arthrobacter_D;	Bacteria	Actinobacteriota	Actinobacteria	Actinomycetales	Micrococcaceae	Arthrobacter_D
SiePeasudMG_2_bin.82	SiePeasudMG_2_bin.82.fa	TRUE	SiePeasudMG_2_bin.82	94.44	0.93	4848798	57959	d__Bacteria;p__Armatimonadota;c__Chthonomonadetes;o__Chthonomonadales;f__;g__;s__	Bacteria;Armatimonadota;Chthonomonadetes;Chthonomonadales;;;	Bacteria	Armatimonadota	Chthonomonadetes	Chthonomonadales
SiePeasudMG_2_bin.83	SiePeasudMG_2_bin.83.fa	TRUE	SiePeasudMG_2_bin.83	95.76	1.2	3534792	49904	d__Bacteria;p__Deinococcota;c__Deinococci;o__Deinococcales;f__Trueperaceae;g__Truepera_A;s__	Bacteria;Deinococcota;Deinococci;Deinococcales;Trueperaceae;Truepera_A;	Bacteria	Deinococcota	Deinococci	Deinococcales	Trueperaceae	Truepera_A
SiePeasudMG_2_bin.84	SiePeasudMG_2_bin.84.fa	TRUE	SiePeasudMG_2_bin.84	98.52	2.22	6581582	71672	d__Bacteria;p__Bacteroidota;c__Bacteroidia;o__Chitinophagales;f__Chitinophagaceae;g__Segetibacter;s__	Bacteria;Bacteroidota;Bacteroidia;Chitinophagales;Chitinophagaceae;Segetibacter;	Bacteria	Bacteroidota	Bacteroidia	Chitinophagales	Chitinophagaceae	Segetibacter
SiePeasudMG_2_bin.85	SiePeasudMG_2_bin.85.fa	TRUE	SiePeasudMG_2_bin.85	55.6	3.45	2527187	7702	d__Bacteria;p__Actinobacteriota;c__Actinobacteria;o__Actinomycetales;f__Angustibacteraceae;g__;s__	Bacteria;Actinobacteriota;Actinobacteria;Actinomycetales;Angustibacteraceae;;	Bacteria	Actinobacteriota	Actinobacteria	Actinomycetales	Angustibacteraceae
SiePeasudMG_2_bin.86	SiePeasudMG_2_bin.86.fa	TRUE	SiePeasudMG_2_bin.86	82.76	0	3754592	71463	d__Bacteria;p__Actinobacteriota;c__Actinobacteria;o__Frankiales;f__Frankiaceae;g__;s__	Bacteria;Actinobacteriota;Actinobacteria;Frankiales;Frankiaceae;;	Bacteria	Actinobacteriota	Actinobacteria	Frankiales	Frankiaceae
SiePeasudMG_2_bin.87	SiePeasudMG_2_bin.87.fa	TRUE	SiePeasudMG_2_bin.87	92.43	1.47	2556089	15707	d__Bacteria;p__Proteobacteria;c__Alphaproteobacteria;o__Sphingomonadales;f__Sphingomonadaceae;g__;s__	Bacteria;Proteobacteria;Alphaproteobacteria;Sphingomonadales;Sphingomonadaceae;;	Bacteria	Proteobacteria	Alphaproteobacteria	Sphingomonadales	Sphingomonadaceae
SiePeasudMG_2_bin.89	SiePeasudMG_2_bin.89.fa	TRUE	SiePeasudMG_2_bin.89	57.98	0	1698001	5299	d__Bacteria;p__Actinobacteriota;c__Acidimicrobiia;o__;f__;g__;s__	Bacteria;Actinobacteriota;Acidimicrobiia;;;;	Bacteria	Actinobacteriota	Acidimicrobiia
SiePeasudMG_2_bin.91	SiePeasudMG_2_bin.91.fa	FALSE	UniValnordMG_2_bin.36	94.02	3.38	3106603	16127	d__Bacteria;p__Actinobacteriota;c__Actinobacteria;o__Jiangellales;f__;g__;s__	Bacteria;Actinobacteriota;Actinobacteria;Jiangellales;;;	Bacteria	Actinobacteriota	Actinobacteria	Jiangellales
SiePeasudMG_2_bin.92	SiePeasudMG_2_bin.92.fa	TRUE	SiePeasudMG_2_bin.92	81.44	2.27	5152510	13210	d__Bacteria;p__Planctomycetota;c__Planctomycetes;o__Gemmatales;f__Gemmataceae;g__Fimbriiglobus;s__	Bacteria;Planctomycetota;Planctomycetes;Gemmatales;Gemmataceae;Fimbriiglobus;	Bacteria	Planctomycetota	Planctomycetes	Gemmatales	Gemmataceae	Fimbriiglobus
SiePeasudMG_2_bin.93	SiePeasudMG_2_bin.93.fa	TRUE	SiePeasudMG_2_bin.93	96.7	0.94	4180248	134299	d__Bacteria;p__Chloroflexota;c__Chloroflexia;o__Thermomicrobiales;f__UBA6265;g__;s__	Bacteria;Chloroflexota;Chloroflexia;Thermomicrobiales;UBA6265;;	Bacteria	Chloroflexota	Chloroflexia	Thermomicrobiales	UBA6265
SiePeasudMG_2_bin.95	SiePeasudMG_2_bin.95.fa	TRUE	SiePeasudMG_2_bin.95	58.6	0.34	1621785	7476	d__Bacteria;p__Actinobacteriota;c__Actinobacteria;o__Actinomycetales;f__Micrococcaceae;g__Arthrobacter_D;s__	Bacteria;Actinobacteriota;Actinobacteria;Actinomycetales;Micrococcaceae;Arthrobacter_D;	Bacteria	Actinobacteriota	Actinobacteria	Actinomycetales	Micrococcaceae	Arthrobacter_D
TrioNunataknord_2_bin.100	TrioNunataknord_2_bin.100.fa	TRUE	TrioNunataknord_2_bin.100	76.54	0	913544	606960	d__Bacteria;p__Patescibacteria;c__Kazan;o__;f__;g__;s__	Bacteria;Patescibacteria;Kazan;;;;	Bacteria	Patescibacteria	Kazan
TrioNunataknord_2_bin.101	TrioNunataknord_2_bin.101.fa	TRUE	TrioNunataknord_2_bin.101	96.58	0.43	3439601	185564	d__Bacteria;p__Actinobacteriota;c__Thermoleophilia;o__Solirubrobacterales;f__Thermoleophilaceae;g__;s__	Bacteria;Actinobacteriota;Thermoleophilia;Solirubrobacterales;Thermoleophilaceae;;	Bacteria	Actinobacteriota	Thermoleophilia	Solirubrobacterales	Thermoleophilaceae
TrioNunataknord_2_bin.106	TrioNunataknord_2_bin.106.fa	FALSE	UniValsudMG_2_bin.79	89.45	0.92	3056648	129178	d__Bacteria;p__Chloroflexota;c__Ellin6529;o__CSP1-4;f__CSP1-4;g__RBG-16-69-14;s__	Bacteria;Chloroflexota;Ellin6529;CSP1-4;CSP1-4;RBG-16-69-14;	Bacteria	Chloroflexota	Ellin6529	CSP1-4	CSP1-4	RBG-16-69-14
TrioNunataknord_2_bin.109	TrioNunataknord_2_bin.109.fa	FALSE	SiePeasudMG_2_bin.105	99.81	0.94	5459286	60561	d__Bacteria;p__Chloroflexota;c__Chloroflexia;o__Thermomicrobiales;f__UBA6265;g__;s__	Bacteria;Chloroflexota;Chloroflexia;Thermomicrobiales;UBA6265;;	Bacteria	Chloroflexota	Chloroflexia	Thermomicrobiales	UBA6265
TrioNunataknord_2_bin.115	TrioNunataknord_2_bin.115.fa	FALSE	RickerHillsnord_2_bin.48	92.54	0.5	3793095	24938	d__Bacteria;p__Proteobacteria;c__Alphaproteobacteria;o__Acetobacterales;f__Acetobacteraceae;g__70-18;s__	Bacteria;Proteobacteria;Alphaproteobacteria;Acetobacterales;Acetobacteraceae;70-18;	Bacteria	Proteobacteria	Alphaproteobacteria	Acetobacterales	Acetobacteraceae	70-18
TrioNunataknord_2_bin.117	TrioNunataknord_2_bin.117.fa	TRUE	TrioNunataknord_2_bin.117	97.44	4.27	4104275	63495	d__Bacteria;p__Acidobacteriota;c__Blastocatellia;o__Pyrinomonadales;f__Pyrinomonadaceae;g__;s__	Bacteria;Acidobacteriota;Blastocatellia;Pyrinomonadales;Pyrinomonadaceae;;	Bacteria	Acidobacteriota	Blastocatellia	Pyrinomonadales	Pyrinomonadaceae
TrioNunataknord_2_bin.126	TrioNunataknord_2_bin.126.fa	TRUE	TrioNunataknord_2_bin.126	89.01	2.1	3488808	14979	d__Bacteria;p__Actinobacteriota;c__Actinobacteria;o__Corynebacteriales;f__Geodermatophilaceae;g__;s__	Bacteria;Actinobacteriota;Actinobacteria;Corynebacteriales;Geodermatophilaceae;;	Bacteria	Actinobacteriota	Actinobacteria	Corynebacteriales	Geodermatophilaceae
TrioNunataknord_2_bin.20	TrioNunataknord_2_bin.20.fa	FALSE	SiePeasudMG_2_bin.58	76.94	2.59	2039203	5813	d__Bacteria;p__Actinobacteriota;c__Thermoleophilia;o__Solirubrobacterales;f__70-9;g__;s__	Bacteria;Actinobacteriota;Thermoleophilia;Solirubrobacterales;70-9;;	Bacteria	Actinobacteriota	Thermoleophilia	Solirubrobacterales	70-9
TrioNunataknord_2_bin.21	TrioNunataknord_2_bin.21.fa	FALSE	LinTernordMG_2_bin.4	69.2	6.18	3146056	14949	d__Bacteria;p__Actinobacteriota;c__Actinobacteria;o__Corynebacteriales;f__Nakamurellaceae;g__Nakamurella_A;s__	Bacteria;Actinobacteriota;Actinobacteria;Corynebacteriales;Nakamurellaceae;Nakamurella_A;	Bacteria	Actinobacteriota	Actinobacteria	Corynebacteriales	Nakamurellaceae	Nakamurella_A
TrioNunataknord_2_bin.23	TrioNunataknord_2_bin.23.fa	FALSE	UniValsudMG_2_bin.59	94.86	1.26	3138747	173220	d__Bacteria;p__Actinobacteriota;c__Actinobacteria;o__Frankiales;f__Frankiaceae;g__;s__	Bacteria;Actinobacteriota;Actinobacteria;Frankiales;Frankiaceae;;	Bacteria	Actinobacteriota	Actinobacteria	Frankiales	Frankiaceae
TrioNunataknord_2_bin.24	TrioNunataknord_2_bin.24.fa	TRUE	TrioNunataknord_2_bin.24	98.68	0.88	3722345	32158	d__Bacteria;p__Actinobacteriota;c__Rubrobacteria;o__Rubrobacterales;f__Rubrobacteraceae;g__Rubrobacter_A;s__	Bacteria;Actinobacteriota;Rubrobacteria;Rubrobacterales;Rubrobacteraceae;Rubrobacter_A;	Bacteria	Actinobacteriota	Rubrobacteria	Rubrobacterales	Rubrobacteraceae	Rubrobacter_A
TrioNunataknord_2_bin.27	TrioNunataknord_2_bin.27.fa	TRUE	TrioNunataknord_2_bin.27	58.9	6.41	1670667	4645	d__Bacteria;p__Actinobacteriota;c__Thermoleophilia;o__Solirubrobacterales;f__Thermoleophilaceae;g__;s__	Bacteria;Actinobacteriota;Thermoleophilia;Solirubrobacterales;Thermoleophilaceae;;	Bacteria	Actinobacteriota	Thermoleophilia	Solirubrobacterales	Thermoleophilaceae
TrioNunataknord_2_bin.28	TrioNunataknord_2_bin.28.fa	TRUE	TrioNunataknord_2_bin.28	96.23	0.94	4874472	133466	d__Bacteria;p__Chloroflexota;c__Chloroflexia;o__Thermomicrobiales;f__UBA6265;g__;s__	Bacteria;Chloroflexota;Chloroflexia;Thermomicrobiales;UBA6265;;	Bacteria	Chloroflexota	Chloroflexia	Thermomicrobiales	UBA6265
TrioNunataknord_2_bin.29	TrioNunataknord_2_bin.29.fa	TRUE	TrioNunataknord_2_bin.29	99.03	1.9	3913334	102235	d__Bacteria;p__Actinobacteriota;c__Actinobacteria;o__Corynebacteriales;f__Corynebacteriaceae;g__;s__	Bacteria;Actinobacteriota;Actinobacteria;Corynebacteriales;Corynebacteriaceae;;	Bacteria	Actinobacteriota	Actinobacteria	Corynebacteriales	Corynebacteriaceae
TrioNunataknord_2_bin.3	TrioNunataknord_2_bin.3.fa	FALSE	RickerHillsnord_2_bin.36	95.68	8.96	5577523	50674	d__Bacteria;p__Actinobacteriota;c__Actinobacteria;o__Corynebacteriales;f__Jatrophihabitantaceae;g__Iso899;s__	Bacteria;Actinobacteriota;Actinobacteria;Corynebacteriales;Jatrophihabitantaceae;Iso899;	Bacteria	Actinobacteriota	Actinobacteria	Corynebacteriales	Jatrophihabitantaceae	Iso899
TrioNunataknord_2_bin.33	TrioNunataknord_2_bin.33.fa	TRUE	TrioNunataknord_2_bin.33	68.71	2.51	2031253	6165	d__Bacteria;p__Proteobacteria;c__Alphaproteobacteria;o__Sphingomonadales;f__Sphingomonadaceae;g__;s__	Bacteria;Proteobacteria;Alphaproteobacteria;Sphingomonadales;Sphingomonadaceae;;	Bacteria	Proteobacteria	Alphaproteobacteria	Sphingomonadales	Sphingomonadaceae
TrioNunataknord_2_bin.34	TrioNunataknord_2_bin.34.fa	FALSE	UniValsudMG_2_bin.44	70.49	3.45	3198280	11577	d__Bacteria;p__Actinobacteriota;c__Actinobacteria;o__Propionibacteriales;f__;g__;s__	Bacteria;Actinobacteriota;Actinobacteria;Propionibacteriales;;;	Bacteria	Actinobacteriota	Actinobacteria	Propionibacteriales
TrioNunataknord_2_bin.35	TrioNunataknord_2_bin.35.fa	FALSE	UniValsudMG_2_bin.68	93.16	1.71	3332999	26652	d__Bacteria;p__Actinobacteriota;c__Acidimicrobiia;o__Microtrichales;f__;g__;s__	Bacteria;Actinobacteriota;Acidimicrobiia;Microtrichales;;;	Bacteria	Actinobacteriota	Acidimicrobiia	Microtrichales
TrioNunataknord_2_bin.37	TrioNunataknord_2_bin.37.fa	FALSE	RickerHillsnord_2_bin.17	68.83	6.84	2231361	8483	d__Bacteria;p__Actinobacteriota;c__Thermoleophilia;o__Solirubrobacterales;f__Solirubrobacteraceae;g__;s__	Bacteria;Actinobacteriota;Thermoleophilia;Solirubrobacterales;Solirubrobacteraceae;;	Bacteria	Actinobacteriota	Thermoleophilia	Solirubrobacterales	Solirubrobacteraceae
TrioNunataknord_2_bin.39	TrioNunataknord_2_bin.39.fa	FALSE	SiePeasudMG_2_bin.63	53.97	2	2175424	4644	d__Bacteria;p__Actinobacteriota;c__Actinobacteria;o__Corynebacteriales;f__Nakamurellaceae;g__Nakamurella_A;s__	Bacteria;Actinobacteriota;Actinobacteria;Corynebacteriales;Nakamurellaceae;Nakamurella_A;	Bacteria	Actinobacteriota	Actinobacteria	Corynebacteriales	Nakamurellaceae	Nakamurella_A
TrioNunataknord_2_bin.43	TrioNunataknord_2_bin.43.fa	FALSE	RickerHillsnord_2_bin.54	71.46	2.61	4002753	7043	d__Bacteria;p__Proteobacteria;c__Alphaproteobacteria;o__Acetobacterales;f__Acetobacteraceae;g__70-18;s__	Bacteria;Proteobacteria;Alphaproteobacteria;Acetobacterales;Acetobacteraceae;70-18;	Bacteria	Proteobacteria	Alphaproteobacteria	Acetobacterales	Acetobacteraceae	70-18
TrioNunataknord_2_bin.44	TrioNunataknord_2_bin.44.fa	TRUE	TrioNunataknord_2_bin.44	99.06	0.94	4771714	45841	d__Bacteria;p__Chloroflexota;c__Chloroflexia;o__;f__;g__;s__	Bacteria;Chloroflexota;Chloroflexia;;;;	Bacteria	Chloroflexota	Chloroflexia
TrioNunataknord_2_bin.46	TrioNunataknord_2_bin.46.fa	TRUE	TrioNunataknord_2_bin.46	72.08	2.56	2928785	10139	d__Bacteria;p__Actinobacteriota;c__Thermoleophilia;o__Solirubrobacterales;f__Thermoleophilaceae;g__;s__	Bacteria;Actinobacteriota;Thermoleophilia;Solirubrobacterales;Thermoleophilaceae;;	Bacteria	Actinobacteriota	Thermoleophilia	Solirubrobacterales	Thermoleophilaceae
TrioNunataknord_2_bin.47	TrioNunataknord_2_bin.47.fa	FALSE	UniValnordMG_2_bin.36	99.28	1.35	3576563	172852	d__Bacteria;p__Actinobacteriota;c__Actinobacteria;o__Jiangellales;f__;g__;s__	Bacteria;Actinobacteriota;Actinobacteria;Jiangellales;;;	Bacteria	Actinobacteriota	Actinobacteria	Jiangellales
TrioNunataknord_2_bin.55	TrioNunataknord_2_bin.55.fa	FALSE	UniValsudMG_2_bin.109	72.76	0	1073255	50478	d__Bacteria;p__Patescibacteria;c__Kazan;o__;f__;g__;s__	Bacteria;Patescibacteria;Kazan;;;;	Bacteria	Patescibacteria	Kazan
TrioNunataknord_2_bin.58	TrioNunataknord_2_bin.58.fa	TRUE	TrioNunataknord_2_bin.58	83.55	1.37	2873552	6825	d__Bacteria;p__Actinobacteriota;c__Thermoleophilia;o__Solirubrobacterales;f__Solirubrobacteraceae;g__;s__	Bacteria;Actinobacteriota;Thermoleophilia;Solirubrobacterales;Solirubrobacteraceae;;	Bacteria	Actinobacteriota	Thermoleophilia	Solirubrobacterales	Solirubrobacteraceae
TrioNunataknord_2_bin.6	TrioNunataknord_2_bin.6.fa	TRUE	TrioNunataknord_2_bin.6	64.66	6.9	4165363	5075	d__Bacteria;p__Actinobacteriota;c__Actinobacteria;o__Corynebacteriales;f__Geodermatophilaceae;g__;s__	Bacteria;Actinobacteriota;Actinobacteria;Corynebacteriales;Geodermatophilaceae;;	Bacteria	Actinobacteriota	Actinobacteria	Corynebacteriales	Geodermatophilaceae
TrioNunataknord_2_bin.60	TrioNunataknord_2_bin.60.fa	FALSE	RickerHillsnord_2_bin.26	68.21	5.72	3137029	6962	d__Bacteria;p__Actinobacteriota;c__Actinobacteria;o__Frankiales;f__Frankiaceae;g__;s__	Bacteria;Actinobacteriota;Actinobacteria;Frankiales;Frankiaceae;;	Bacteria	Actinobacteriota	Actinobacteria	Frankiales	Frankiaceae
TrioNunataknord_2_bin.63	TrioNunataknord_2_bin.63.fa	TRUE	TrioNunataknord_2_bin.63	97.77	0.27	4744453	116978	d__Bacteria;p__Actinobacteriota;c__Actinobacteria;o__Corynebacteriales;f__Nakamurellaceae;g__Nakamurella_A;s__	Bacteria;Actinobacteriota;Actinobacteria;Corynebacteriales;Nakamurellaceae;Nakamurella_A;	Bacteria	Actinobacteriota	Actinobacteria	Corynebacteriales	Nakamurellaceae	Nakamurella_A
TrioNunataknord_2_bin.66	TrioNunataknord_2_bin.66.fa	TRUE	TrioNunataknord_2_bin.66	58.13	9.54	3039286	4064	d__Bacteria;p__Chloroflexota;c__Chloroflexia;o__Thermomicrobiales;f__UBA6265;g__;s__	Bacteria;Chloroflexota;Chloroflexia;Thermomicrobiales;UBA6265;;	Bacteria	Chloroflexota	Chloroflexia	Thermomicrobiales	UBA6265
TrioNunataknord_2_bin.67	TrioNunataknord_2_bin.67.fa	FALSE	UniValsudMG_2_bin.16	97.17	2.94	4515951	28855	d__Bacteria;p__Chloroflexota;c__Chloroflexia;o__Thermomicrobiales;f__UBA6265;g__;s__	Bacteria;Chloroflexota;Chloroflexia;Thermomicrobiales;UBA6265;;	Bacteria	Chloroflexota	Chloroflexia	Thermomicrobiales	UBA6265
TrioNunataknord_2_bin.69	TrioNunataknord_2_bin.69.fa	TRUE	TrioNunataknord_2_bin.69	99.01	1.97	6437620	53642	d__Bacteria;p__Bacteroidota;c__Bacteroidia;o__Chitinophagales;f__Chitinophagaceae;g__;s__	Bacteria;Bacteroidota;Bacteroidia;Chitinophagales;Chitinophagaceae;;	Bacteria	Bacteroidota	Bacteroidia	Chitinophagales	Chitinophagaceae
TrioNunataknord_2_bin.79	TrioNunataknord_2_bin.79.fa	TRUE	TrioNunataknord_2_bin.79	51.25	2.14	1970635	4079	d__Bacteria;p__Actinobacteriota;c__Actinobacteria;o__Propionibacteriales;f__Propionibacteriaceae;g__;s__	Bacteria;Actinobacteriota;Actinobacteria;Propionibacteriales;Propionibacteriaceae;;	Bacteria	Actinobacteriota	Actinobacteria	Propionibacteriales	Propionibacteriaceae
TrioNunataknord_2_bin.83	TrioNunataknord_2_bin.83.fa	TRUE	TrioNunataknord_2_bin.83	95.83	1.72	3572795	234048	d__Bacteria;p__Actinobacteriota;c__Thermoleophilia;o__20CM-4-69-9;f__20CM-4-69-9;g__;s__	Bacteria;Actinobacteriota;Thermoleophilia;20CM-4-69-9;20CM-4-69-9;;	Bacteria	Actinobacteriota	Thermoleophilia	20CM-4-69-9	20CM-4-69-9
TrioNunataknord_2_bin.87	TrioNunataknord_2_bin.87.fa	FALSE	SiePeasudMG_2_bin.62	71.68	6.73	4696139	6305	d__Bacteria;p__Chloroflexota;c__Chloroflexia;o__;f__;g__;s__	Bacteria;Chloroflexota;Chloroflexia;;;;	Bacteria	Chloroflexota	Chloroflexia
TrioNunataknord_2_bin.9	TrioNunataknord_2_bin.9.fa	TRUE	TrioNunataknord_2_bin.9	61.03	2.56	2095923	9213	d__Bacteria;p__Actinobacteriota;c__Thermoleophilia;o__Solirubrobacterales;f__Solirubrobacteraceae;g__;s__	Bacteria;Actinobacteriota;Thermoleophilia;Solirubrobacterales;Solirubrobacteraceae;;	Bacteria	Actinobacteriota	Thermoleophilia	Solirubrobacterales	Solirubrobacteraceae
TrioNunataknord_2_bin.90	TrioNunataknord_2_bin.90.fa	TRUE	TrioNunataknord_2_bin.90	99.26	0.74	4919147	98200	d__Bacteria;p__Bacteroidota;c__Bacteroidia;o__Chitinophagales;f__Chitinophagaceae;g__Segetibacter;s__	Bacteria;Bacteroidota;Bacteroidia;Chitinophagales;Chitinophagaceae;Segetibacter;	Bacteria	Bacteroidota	Bacteroidia	Chitinophagales	Chitinophagaceae	Segetibacter
TrioNunataknord_2_bin.94	TrioNunataknord_2_bin.94.fa	TRUE	TrioNunataknord_2_bin.94	61.49	2.82	2544541	5620	d__Bacteria;p__Actinobacteriota;c__Actinobacteria;o__Propionibacteriales;f__Propionibacteriaceae;g__;s__	Bacteria;Actinobacteriota;Actinobacteria;Propionibacteriales;Propionibacteriaceae;;	Bacteria	Actinobacteriota	Actinobacteria	Propionibacteriales	Propionibacteriaceae
TrioNunataknord_2_bin.95	TrioNunataknord_2_bin.95.fa	TRUE	TrioNunataknord_2_bin.95	88.82	0.44	2916615	12251	d__Bacteria;p__Actinobacteriota;c__Rubrobacteria;o__Rubrobacterales;f__Rubrobacteraceae;g__Rubrobacter_A;s__	Bacteria;Actinobacteriota;Rubrobacteria;Rubrobacterales;Rubrobacteraceae;Rubrobacter_A;	Bacteria	Actinobacteriota	Rubrobacteria	Rubrobacterales	Rubrobacteraceae	Rubrobacter_A
UniValnordMG_2_bin.12	UniValnordMG_2_bin.12.fa	TRUE	UniValnordMG_2_bin.12	68.57	4.46	5245431	6710	d__Bacteria;p__Chloroflexota;c__UBA5177;o__;f__;g__;s__	Bacteria;Chloroflexota;UBA5177;;;;	Bacteria	Chloroflexota	UBA5177
UniValnordMG_2_bin.14	UniValnordMG_2_bin.14.fa	TRUE	UniValnordMG_2_bin.14	87.05	1.89	4286477	13125	d__Bacteria;p__Chloroflexota;c__Chloroflexia;o__;f__;g__;s__	Bacteria;Chloroflexota;Chloroflexia;;;;	Bacteria	Chloroflexota	Chloroflexia
UniValnordMG_2_bin.23	UniValnordMG_2_bin.23.fa	TRUE	UniValnordMG_2_bin.23	98.26	1	4181771	52225	d__Bacteria;p__Proteobacteria;c__Alphaproteobacteria;o__Acetobacterales;f__Acetobacteraceae;g__70-18;s__	Bacteria;Proteobacteria;Alphaproteobacteria;Acetobacterales;Acetobacteraceae;70-18;	Bacteria	Proteobacteria	Alphaproteobacteria	Acetobacterales	Acetobacteraceae	70-18
UniValnordMG_2_bin.24	UniValnordMG_2_bin.24.fa	FALSE	SiePeanordMG_2_bin.56	53.08	1.08	2283827	4086	d__Bacteria;p__Actinobacteriota;c__Actinobacteria;o__Actinomycetales;f__Dermatophilaceae;g__GCA-2748155;s__	Bacteria;Actinobacteriota;Actinobacteria;Actinomycetales;Dermatophilaceae;GCA-2748155;	Bacteria	Actinobacteriota	Actinobacteria	Actinomycetales	Dermatophilaceae	GCA-2748155
UniValnordMG_2_bin.32	UniValnordMG_2_bin.32.fa	FALSE	PudButsudMG_2_bin.62	90.33	2.97	5374444	9021	d__Bacteria;p__Actinobacteriota;c__Actinobacteria;o__Corynebacteriales;f__Nakamurellaceae;g__Nakamurella;s__	Bacteria;Actinobacteriota;Actinobacteria;Corynebacteriales;Nakamurellaceae;Nakamurella;	Bacteria	Actinobacteriota	Actinobacteria	Corynebacteriales	Nakamurellaceae	Nakamurella
UniValnordMG_2_bin.36	UniValnordMG_2_bin.36.fa	TRUE	UniValnordMG_2_bin.36	98.74	1.19	3531420	55197	d__Bacteria;p__Actinobacteriota;c__Actinobacteria;o__Jiangellales;f__;g__;s__	Bacteria;Actinobacteriota;Actinobacteria;Jiangellales;;;	Bacteria	Actinobacteriota	Actinobacteria	Jiangellales
UniValnordMG_2_bin.40	UniValnordMG_2_bin.40.fa	FALSE	RicNunsandstonMG_4_bin.58	95.73	0.5	3826470	24398	d__Bacteria;p__Actinobacteriota;c__Thermoleophilia;o__Solirubrobacterales;f__Solirubrobacteraceae;g__;s__	Bacteria;Actinobacteriota;Thermoleophilia;Solirubrobacterales;Solirubrobacteraceae;;	Bacteria	Actinobacteriota	Thermoleophilia	Solirubrobacterales	Solirubrobacteraceae
UniValnordMG_2_bin.44	UniValnordMG_2_bin.44.fa	FALSE	ButProsudMG_2_bin.21	55.16	1.94	1972365	5785	d__Bacteria;p__Actinobacteriota;c__Actinobacteria;o__Corynebacteriales;f__Corynebacteriaceae;g__;s__	Bacteria;Actinobacteriota;Actinobacteria;Corynebacteriales;Corynebacteriaceae;;	Bacteria	Actinobacteriota	Actinobacteria	Corynebacteriales	Corynebacteriaceae
UniValnordMG_2_bin.45	UniValnordMG_2_bin.45.fa	TRUE	UniValnordMG_2_bin.45	97.85	3.22	2951941	17234	d__Bacteria;p__Actinobacteriota;c__Actinobacteria;o__Actinomycetales;f__Dermatophilaceae;g__GCA-2748155;s__	Bacteria;Actinobacteriota;Actinobacteria;Actinomycetales;Dermatophilaceae;GCA-2748155;	Bacteria	Actinobacteriota	Actinobacteria	Actinomycetales	Dermatophilaceae	GCA-2748155
UniValnordMG_2_bin.46	UniValnordMG_2_bin.46.fa	FALSE	LinTernordMG_2_bin.21	87.21	4.02	5315094	7601	d__Bacteria;p__Proteobacteria;c__Alphaproteobacteria;o__Acetobacterales;f__Acetobacteraceae;g__70-18;s__	Bacteria;Proteobacteria;Alphaproteobacteria;Acetobacterales;Acetobacteraceae;70-18;	Bacteria	Proteobacteria	Alphaproteobacteria	Acetobacterales	Acetobacteraceae	70-18
UniValnordMG_2_bin.58	UniValnordMG_2_bin.58.fa	TRUE	UniValnordMG_2_bin.58	98.24	1.43	5491415	28389	d__Bacteria;p__Proteobacteria;c__Alphaproteobacteria;o__Rhizobiales;f__Beijerinckiaceae;g__;s__	Bacteria;Proteobacteria;Alphaproteobacteria;Rhizobiales;Beijerinckiaceae;;	Bacteria	Proteobacteria	Alphaproteobacteria	Rhizobiales	Beijerinckiaceae
UniValnordMG_2_bin.59	UniValnordMG_2_bin.59.fa	FALSE	PudButsudMG_2_bin.15	90.17	0.85	3649958	148004	d__Bacteria;p__Acidobacteriota;c__Acidobacteriae;o__Acidobacteriales;f__Acidobacteriaceae;g__;s__	Bacteria;Acidobacteriota;Acidobacteriae;Acidobacteriales;Acidobacteriaceae;;	Bacteria	Acidobacteriota	Acidobacteriae	Acidobacteriales	Acidobacteriaceae
UniValnordMG_2_bin.60	UniValnordMG_2_bin.60.fa	FALSE	SiePeanordMG_2_bin.60	83.13	4.82	8307599	7520	d__Bacteria;p__Actinobacteriota;c__Actinobacteria;o__Frankiales;f__;g__;s__	Bacteria;Actinobacteriota;Actinobacteria;Frankiales;;;	Bacteria	Actinobacteriota	Actinobacteria	Frankiales
UniValnordMG_2_bin.66	UniValnordMG_2_bin.66.fa	TRUE	UniValnordMG_2_bin.66	97.76	1.06	3661480	66315	d__Bacteria;p__Proteobacteria;c__Alphaproteobacteria;o__Acetobacterales;f__Acetobacteraceae;g__70-18;s__	Bacteria;Proteobacteria;Alphaproteobacteria;Acetobacterales;Acetobacteraceae;70-18;	Bacteria	Proteobacteria	Alphaproteobacteria	Acetobacterales	Acetobacteraceae	70-18
UniValnordMG_2_bin.69	UniValnordMG_2_bin.69.fa	FALSE	RicNunsandstonMG_4_bin.86	96.58	2.99	3453249	46222	d__Bacteria;p__Actinobacteriota;c__Thermoleophilia;o__Solirubrobacterales;f__Solirubrobacteraceae;g__;s__	Bacteria;Actinobacteriota;Thermoleophilia;Solirubrobacterales;Solirubrobacteraceae;;	Bacteria	Actinobacteriota	Thermoleophilia	Solirubrobacterales	Solirubrobacteraceae
UniValsudMG_2_bin.10	UniValsudMG_2_bin.10.fa	FALSE	RickerHillsnord_2_bin.17	62.07	6.9	2321545	5038	d__Bacteria;p__Actinobacteriota;c__Thermoleophilia;o__Solirubrobacterales;f__Solirubrobacteraceae;g__;s__	Bacteria;Actinobacteriota;Thermoleophilia;Solirubrobacterales;Solirubrobacteraceae;;	Bacteria	Actinobacteriota	Thermoleophilia	Solirubrobacterales	Solirubrobacteraceae
UniValsudMG_2_bin.104	UniValsudMG_2_bin.104.fa	FALSE	RickerHillsnord_2_bin.36	63.42	2.59	2621619	6258	d__Bacteria;p__Actinobacteriota;c__Actinobacteria;o__Corynebacteriales;f__Jatrophihabitantaceae;g__Iso899;s__	Bacteria;Actinobacteriota;Actinobacteria;Corynebacteriales;Jatrophihabitantaceae;Iso899;	Bacteria	Actinobacteriota	Actinobacteria	Corynebacteriales	Jatrophihabitantaceae	Iso899
UniValsudMG_2_bin.105	UniValsudMG_2_bin.105.fa	FALSE	SiePeanordMG_2_bin.60	98.3	4.5	5653772	29549	d__Bacteria;p__Actinobacteriota;c__Actinobacteria;o__Frankiales;f__Frankiaceae;g__;s__	Bacteria;Actinobacteriota;Actinobacteria;Frankiales;Frankiaceae;;	Bacteria	Actinobacteriota	Actinobacteria	Frankiales	Frankiaceae
UniValsudMG_2_bin.107	UniValsudMG_2_bin.107.fa	TRUE	UniValsudMG_2_bin.107	97.84	0.93	3119912	100552	d__Bacteria;p__UBP12;c__UBA5184;o__UBA5184;f__UBA5184;g__;s__	Bacteria;UBP12;UBA5184;UBA5184;UBA5184;;	Bacteria	UBP12	UBA5184	UBA5184	UBA5184
UniValsudMG_2_bin.109	UniValsudMG_2_bin.109.fa	TRUE	UniValsudMG_2_bin.109	73.68	0	1014279	35591	d__Bacteria;p__Patescibacteria;c__Saccharimonadia;o__;f__;g__;s__	Bacteria;Patescibacteria;Saccharimonadia;;;;	Bacteria	Patescibacteria	Saccharimonadia
UniValsudMG_2_bin.111	UniValsudMG_2_bin.111.fa	FALSE	SiePeanordMG_2_bin.24	87.96	0.31	4606111	42666	d__Bacteria;p__Armatimonadota;c__CG2-30-59-28;o__;f__;g__;s__	Bacteria;Armatimonadota;CG2-30-59-28;;;;	Bacteria	Armatimonadota	CG2-30-59-28
UniValsudMG_2_bin.112	UniValsudMG_2_bin.112.fa	FALSE	SiePeanordMG_2_bin.15	96.02	0.86	6312590	22862	d__Bacteria;p__Proteobacteria;c__Alphaproteobacteria;o__Acetobacterales;f__Acetobacteraceae;g__70-18;s__	Bacteria;Proteobacteria;Alphaproteobacteria;Acetobacterales;Acetobacteraceae;70-18;	Bacteria	Proteobacteria	Alphaproteobacteria	Acetobacterales	Acetobacteraceae	70-18
UniValsudMG_2_bin.113	UniValsudMG_2_bin.113.fa	TRUE	UniValsudMG_2_bin.113	98.71	0.86	2720142	371239	d__Bacteria;p__Actinobacteriota;c__Thermoleophilia;o__Solirubrobacterales;f__70-9;g__;s__	Bacteria;Actinobacteriota;Thermoleophilia;Solirubrobacterales;70-9;;	Bacteria	Actinobacteriota	Thermoleophilia	Solirubrobacterales	70-9
UniValsudMG_2_bin.114	UniValsudMG_2_bin.114.fa	FALSE	UniValnordMG_2_bin.36	59.9	1.08	1868597	5198	d__Bacteria;p__Actinobacteriota;c__Actinobacteria;o__Jiangellales;f__;g__;s__	Bacteria;Actinobacteriota;Actinobacteria;Jiangellales;;;	Bacteria	Actinobacteriota	Actinobacteria	Jiangellales
UniValsudMG_2_bin.115	UniValsudMG_2_bin.115.fa	FALSE	MtNewZealnordMG_2_bin.7	95.71	3.3	4241137	41774	d__Bacteria;p__Chloroflexota;c__UBA5177;o__UBA5177;f__UBA5177;g__;s__	Bacteria;Chloroflexota;UBA5177;UBA5177;UBA5177;;	Bacteria	Chloroflexota	UBA5177	UBA5177	UBA5177
UniValsudMG_2_bin.119	UniValsudMG_2_bin.119.fa	FALSE	SiePeanordMG_2_bin.41	67.11	0.43	3307264	6437	d__Bacteria;p__Actinobacteriota;c__Actinobacteria;o__Actinomycetales;f__Dermatophilaceae;g__UBA4719;s__	Bacteria;Actinobacteriota;Actinobacteria;Actinomycetales;Dermatophilaceae;UBA4719;	Bacteria	Actinobacteriota	Actinobacteria	Actinomycetales	Dermatophilaceae	UBA4719
UniValsudMG_2_bin.121	UniValsudMG_2_bin.121.fa	FALSE	SiePeasudMG_2_bin.105	88.21	0.47	5272299	13860	d__Bacteria;p__Chloroflexota;c__Chloroflexia;o__Thermomicrobiales;f__UBA6265;g__;s__	Bacteria;Chloroflexota;Chloroflexia;Thermomicrobiales;UBA6265;;	Bacteria	Chloroflexota	Chloroflexia	Thermomicrobiales	UBA6265
UniValsudMG_2_bin.125	UniValsudMG_2_bin.125.fa	TRUE	UniValsudMG_2_bin.125	74.69	5.61	4876346	6993	d__Bacteria;p__Chloroflexota;c__UBA5177;o__;f__;g__;s__	Bacteria;Chloroflexota;UBA5177;;;;	Bacteria	Chloroflexota	UBA5177
UniValsudMG_2_bin.127	UniValsudMG_2_bin.127.fa	TRUE	UniValsudMG_2_bin.127	82.37	2.96	5145101	7351	d__Bacteria;p__Bacteroidota;c__Bacteroidia;o__Chitinophagales;f__Chitinophagaceae;g__Segetibacter;s__	Bacteria;Bacteroidota;Bacteroidia;Chitinophagales;Chitinophagaceae;Segetibacter;	Bacteria	Bacteroidota	Bacteroidia	Chitinophagales	Chitinophagaceae	Segetibacter
[truncated: 37 more rows]

## Sheet: S3
Phylum	Median	Q1	Q3	IQR	Mean	SD	#CBS
[truncated: 12 more rows]

## Sheet: S4
Order	# CBS	# GTDB Repr.	Increase %
[truncated: 19 more rows]

## Sheet: S5
ID	Extended ID	Site	Card	Latitude	Longitude	Coordinates (DMS)	Altitude (m a.s.l.)	Temperature (°C)	Humidity (%)	Sampling date	SRA accession	BioProject	Genbank accession	IMG Genome ID	N50
[truncated: 18 more rows]

[truncated: 5 more sheets: S6, S7, S8, S9, S10]
